# Supplementary material
Source: MDPI journal article supplement (https://www.mdpi.com/1996-1073/13/11/2747)
Supplement: s1 [file s1]

Archive with 5 entries (5 files):
- z.Appendix A - List of biogas feedstock terms and variants.pdf
- z.Appendix B - List of biomass application terms and variants.pdf
- z.Appendix C - List of validated co-occurrences.pdf
- z.Appendix D - Co-occurences matrix and link to the source codes.pdf
- z.Appendix E - List of literature with the co-occurences.xlsx
