# Supplementary material
Source: MDPI journal article supplement (https://www.mdpi.com/1996-1073/13/11/2747)

**Link to the source codes:** <https://github.com/cbdavis/Biogase-Feedstock-Application-Cooccurrence>

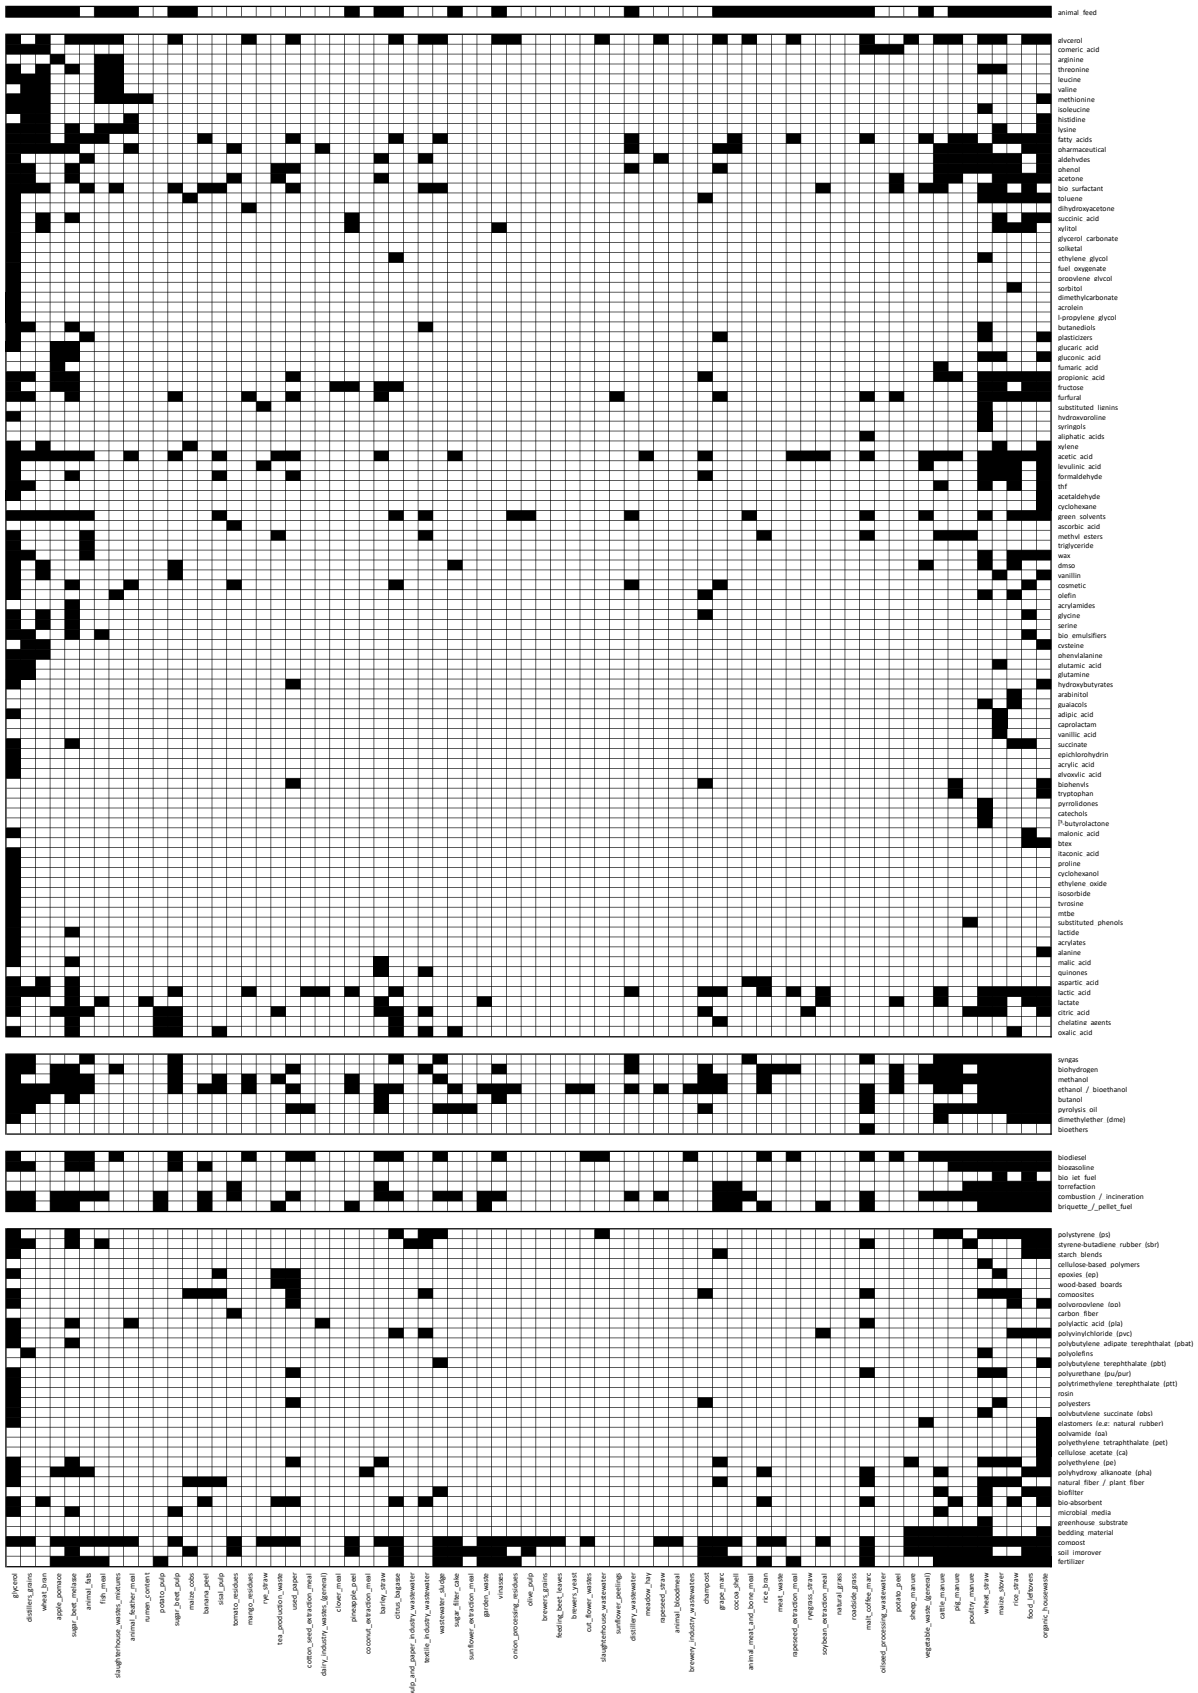

Supplement: s1 [file s1]
