# Supplementary material
Source: MDPI journal article supplement (https://www.mdpi.com/1996-1073/13/11/2747)
Supplement: s1 [file s1 › z.Appendix B - List of biomass application terms and variants.pdf]

Appendix B: List of biomass application terms and variants

| CATEGORY    | APPLICATION TERM            | VARIANTS OF THE TERM                                                                                                                                                                                                                                                                                                                                                                                                                                                                                                                                                       | REFERENCES |
|-------------|-----------------------------|----------------------------------------------------------------------------------------------------------------------------------------------------------------------------------------------------------------------------------------------------------------------------------------------------------------------------------------------------------------------------------------------------------------------------------------------------------------------------------------------------------------------------------------------------------------------------|------------|
| ANIMAL_FEED | animal_feed                 | animal_feed; animal_feed_supplement; animal_feed_protein; food_and_animal_feed; food_and_animal_feed_industries; animal_diet; feed_products; feed_formulation; poultry_feed; herbal_feed_additives; different_feed_additives; fodder_production; animal_fodder; forage; forage_crop; forage_crops; perennial_forage; forage_source; grass_forage; other_forages; fresh_forage; perennial_forages; forage_grass; forage_types; livestock_biomass; grazed_biomass; concentrate; concentrate_mixtures; concentrate_mix; concentrate_intake; compound_feed; pet_food; pet_feed |            |
| CHEMICALS   |                             |                                                                                                                                                                                                                                                                                                                                                                                                                                                                                                                                                                            | [1-6]      |
| CHEMICALS   | acetaldehyde                | acetaldehyde; gaseous_acetaldehyde; ch3cho                                                                                                                                                                                                                                                                                                                                                                                                                                                                                                                                 |            |
| CHEMICALS   | acetic_acid                 | acetic_acid; acetic_acid_(ch3cooh); acetic_acid_solutions; pure_acetic_acid; high_acetic_acid; e.g._acetic_acid; acetic_and_propionic_acid; acetic_and_formic_acid; more_acetic_acid                                                                                                                                                                                                                                                                                                                                                                                       |            |
| CHEMICALS   | oxalic_acid                 | oxalic_acid; dilute_oxalic_acid; aqueous_oxalic_acid; oxalic_and_acetic_acids; acetic_and_oxalic_acids; crystalline_oxalic_acid; oxalic_and_oxamic_acids                                                                                                                                                                                                                                                                                                                                                                                                                   |            |
| CHEMICALS   | ethylene_glycol             | ethylene_glycol; (ethylene_glycol; mono_ethylene_glycol; ethylene_glycol_steam; ethylene_glycol_ethers; water_and_ethylene_glycol                                                                                                                                                                                                                                                                                                                                                                                                                                          |            |
| CHEMICALS   | ethylene_oxide              | ethylene_oxide; ethylene_oxidation                                                                                                                                                                                                                                                                                                                                                                                                                                                                                                                                         |            |
| CHEMICALS   | glyoxylic_acid              | glyoxylic_acid                                                                                                                                                                                                                                                                                                                                                                                                                                                                                                                                                             |            |
| CHEMICALS   | 3-hydroxypropionic_acid     | 3-hydroxypropionic_acid; -hydroxypropionic; hydroxy_propionic_acid                                                                                                                                                                                                                                                                                                                                                                                                                                                                                                         |            |
| CHEMICALS   | lactic_acid                 | lactic_acid; (lactic_acid; )_lactic_acid; (l_lactic_acid; g_lactic_acid; e.g._lactic_acid; more_lactic_acid; lactic_acid_formation; lactic_and_acetic_acid; lactic_acid_content; mainly_lactic_acid; lactic_acid_conversion; acetic_and_lactic_acid; lactic_acid_productivity                                                                                                                                                                                                                                                                                              |            |
| CHEMICALS   | malonic_acid                | malonic_acid                                                                                                                                                                                                                                                                                                                                                                                                                                                                                                                                                               |            |
| CHEMICALS   | propionic_acid              | propionic_acid; propionic_acids; acetic_and_propionic_acid; propionic_and_butyric_acids; propionic_acid_accumulation; especially_propionic_acid; hydroxy_propionic_acid                                                                                                                                                                                                                                                                                                                                                                                                    |            |
| CHEMICALS   | acetone                     | acetone; acetone&butanol; solvent_acetone; (acetone; acetone_results; acetone_solution; acetone_condensation; acetone_concentration; acetone_butanol_ethanol_mixture; acetone_n_butanol_ethanol; acetone_content; acetone_conversions                                                                                                                                                                                                                                                                                                                                      |            |
| CHEMICALS   | 1,2-propanediol             | 1,2-propanediol                                                                                                                                                                                                                                                                                                                                                                                                                                                                                                                                                            |            |
| CHEMICALS   | 1,3-propanediol             | 1,3-propanediol                                                                                                                                                                                                                                                                                                                                                                                                                                                                                                                                                            |            |
| CHEMICALS   | acetoin                     | acetoin                                                                                                                                                                                                                                                                                                                                                                                                                                                                                                                                                                    |            |
| CHEMICALS   | aspartic_acid               | aspartic_acid; aspartic; aspartic_and_glutamic_acids; glutamic_and_aspartic_acids                                                                                                                                                                                                                                                                                                                                                                                                                                                                                          |            |
| CHEMICALS   | fumaric_acid                | fumaric_acid; fumaric_acid_production; fumaric_acid_recovery; fumaric_acid_biosynthesis; bio_based_fumaric_acid; conventional_fumaric_acid_fermentation; fumaric_acid_monoethyl; fumaric_acid_monoethyl_ester                                                                                                                                                                                                                                                                                                                                                              |            |
| CHEMICALS   | 3-hydroxybutyrolactone      | 3-hydroxybutyrolactone                                                                                                                                                                                                                                                                                                                                                                                                                                                                                                                                                     |            |
| CHEMICALS   | malic_acid                  | malic_acid; malic_acids; polymalic_acid; citric_and_malic_acids; malic_and_citric_acids; mainly_malic_acid; l_malic_acid; poly(malic_acid                                                                                                                                                                                                                                                                                                                                                                                                                                  |            |
| CHEMICALS   | succinic_acid               | succinic_acid; succinic_acid_productivity; succinic_acid_fermentation; final_succinic_acid_concentration; fermentation_derived_succinic_acid; efficient_succinic_acid_production; economical_succinic_acid_production; bio_based_succinic_acid_production; homo_succinic_acid_production; bio_based_succinate_production; bio_based_succinate                                                                                                                                                                                                                              |            |
| CHEMICALS   | 2,3-butanediol              | 2,3-butanediol                                                                                                                                                                                                                                                                                                                                                                                                                                                                                                                                                             |            |
| CHEMICALS   | 1,4-butanediol              | 1,4-butanediol                                                                                                                                                                                                                                                                                                                                                                                                                                                                                                                                                             |            |
| CHEMICALS   | 1,2,4-butanetriol           | 1,2,4-butanetriol                                                                                                                                                                                                                                                                                                                                                                                                                                                                                                                                                          |            |
| CHEMICALS   | arabinitol                  | arabinitol; arabitol                                                                                                                                                                                                                                                                                                                                                                                                                                                                                                                                                       |            |
| CHEMICALS   | furfural                    | furfural; furfural_(hmf; -furfuraldehyde; furfural_formation; furfural_and_acetic_acid; furfural_conversion                                                                                                                                                                                                                                                                                                                                                                                                                                                                |            |
| CHEMICALS   | glutamic_acid               | glutamic_acid; d_glutamic_acid; aspartic_and_glutamic_acids; glutamic_acid_production; glutamic_and_aspartic_acids; poly(l^3_glutamic_acid; glutamate; glutamate_synthase; glutamate_production                                                                                                                                                                                                                                                                                                                                                                            |            |
| CHEMICALS   | glutaric_acid               | glutaric_acid                                                                                                                                                                                                                                                                                                                                                                                                                                                                                                                                                              |            |
| CHEMICALS   | itaconic_acid               | itaconic_acid; itaconic_acid_yields; renewable_itaconic_acid                                                                                                                                                                                                                                                                                                                                                                                                                                                                                                               |            |
| CHEMICALS   | levulinic_acid              | levulinic_acid; to_levulinic_acid; hydroxymethylfurfural_and_levulinic_acid; derived_levulinic_acid; renewable_levulinic_acid; furfural_and_levulinic_acid; levulinic_acid_yield; bio_based_levulinic_acid; levulinic_acid_hydrogenation                                                                                                                                                                                                                                                                                                                                   |            |
| CHEMICALS   | xylitol                     | xylitol; xylitol_yield; xylitol_formation; xylitol_productivity; biotechnological_xylitol_production; xylitol_concentration; biomass_derived_xylitol; nearly_%_xylitol_conversion; xylitol_bioproduction; xylitol_hydrogenolysis                                                                                                                                                                                                                                                                                                                                           |            |
| CHEMICALS   | xylonic_acid                | xylonic_acid; xylonic                                                                                                                                                                                                                                                                                                                                                                                                                                                                                                                                                      |            |
| CHEMICALS   | aconitic_acid               | aconitic_acid                                                                                                                                                                                                                                                                                                                                                                                                                                                                                                                                                              |            |
| CHEMICALS   | adipic_acid                 | adipic_acid; bio_adipic_acid_production                                                                                                                                                                                                                                                                                                                                                                                                                                                                                                                                    |            |
| CHEMICALS   | ascorbic_acid               | ascorbic_acid; (ascorbic_acid; ascorbic_acid_content                                                                                                                                                                                                                                                                                                                                                                                                                                                                                                                       |            |
| CHEMICALS   | citric_acid                 | citric_acid; (citric_acid; citric_acid_solutions; citric_acid_solution; citric_acid_concentration; g/l_citric_acid; malic_and_citric_acids; citric_acid_productivity; m_citric_acid; citric_acid_fermentation; citric_and_malic_acids; citric_acid_monohydrate; citric_acid_factory                                                                                                                                                                                                                                                                                        |            |
| CHEMICALS   | fructose                    | fructose; fructose_concentration; %_fructose_conversion; only_fructose                                                                                                                                                                                                                                                                                                                                                                                                                                                                                                     |            |
| CHEMICALS   | 2,5_furan_dicarboxylic_acid | 2,5_furan_dicarboxylic_acid                                                                                                                                                                                                                                                                                                                                                                                                                                                                                                                                                |            |
| CHEMICALS   | glucaric_acid               | glucaric; glucaric_acid                                                                                                                                                                                                                                                                                                                                                                                                                                                                                                                                                    |            |
| CHEMICALS   | gluconic_acid               | gluconic_acid                                                                                                                                                                                                                                                                                                                                                                                                                                                                                                                                                              |            |
| CHEMICALS   | kojic_acid                  | kojic_acid                                                                                                                                                                                                                                                                                                                                                                                                                                                                                                                                                                 |            |
| CHEMICALS   | coumaric_acid               | coumaric_acid; coumaric; coumaric_acid                                                                                                                                                                                                                                                                                                                                                                                                                                                                                                                                     |            |
| CHEMICALS   | sorbitol                    | sorbitol                                                                                                                                                                                                                                                                                                                                                                                                                                                                                                                                                                   |            |
| CHEMICALS   | aconic_acid                 | aconic_acid                                                                                                                                                                                                                                                                                                                                                                                                                                                                                                                                                                |            |
| CHEMICALS   | btx                         | btx; btx_aromatics                                                                                                                                                                                                                                                                                                                                                                                                                                                                                                                                                         |            |
| CHEMICALS   | btex                        | btex; btex_concentration; btexs                                                                                                                                                                                                                                                                                                                                                                                                                                                                                                                                            |            |
| CHEMICALS   | toluene                     | toluene; -toluene; (toluene; toluene_solution; toluene_solvent; toluene_formation; toluene_solutions                                                                                                                                                                                                                                                                                                                                                                                                                                                                       |            |
| CHEMICALS   | xylene                      | xylene; xylenes_(btex; p_xylenes; o_xylene; xylene_(btex                                                                                                                                                                                                                                                                                                                                                                                                                                                                                                                   |            |
| CHEMICALS   | benzen                      | benzen; benzene.; benzene_compounds                                                                                                                                                                                                                                                                                                                                                                                                                                                                                                                                        |            |
| CHEMICALS   | cyclohexane                 | cyclohexane; cyclohexane_ring; higher_cyclohexane_conversion                                                                                                                                                                                                                                                                                                                                                                                                                                                                                                               |            |
| CHEMICALS   | styrenes                    | styrenes; p_substituted_styrenes; styrene_monomer; styrene_conversion                                                                                                                                                                                                                                                                                                                                                                                                                                                                                                      |            |
| CHEMICALS   | biphenyls                   | biphenyls                                                                                                                                                                                                                                                                                                                                                                                                                                                                                                                                                                  |            |
| CHEMICALS   | phenol                      | phenol; high_phenol_concentration; phenol_compounds; aqueous_phenol_solutions; phenol_production; higher_phenol_concentrations; aqueous_phenol_solution                                                                                                                                                                                                                                                                                                                                                                                                                    |            |

|           |                            |                                                                                                                                                                                                                                                                                                                                             |  |
|-----------|----------------------------|---------------------------------------------------------------------------------------------------------------------------------------------------------------------------------------------------------------------------------------------------------------------------------------------------------------------------------------------|--|
| CHEMICALS | substituted_phenols        | substituted_phenols; nitro_substituted_phenols; para_substituted_phenols; methoxy_substituted_phenols; various_phenols                                                                                                                                                                                                                      |  |
| CHEMICALS | catechols                  | catechols; catecholate                                                                                                                                                                                                                                                                                                                      |  |
| CHEMICALS | cresols                    | cresols; p_cresols                                                                                                                                                                                                                                                                                                                          |  |
| CHEMICALS | resorcinols                | resorcinols; -methylresorcinol; resorcinol_formaldehyde; model_compound_resorcinol                                                                                                                                                                                                                                                          |  |
| CHEMICALS | eugenol                    | eugenol; isoeugenol                                                                                                                                                                                                                                                                                                                         |  |
| CHEMICALS | syringols                  | syringols; syringyl_phenols                                                                                                                                                                                                                                                                                                                 |  |
| CHEMICALS | coniferols                 | coniferols                                                                                                                                                                                                                                                                                                                                  |  |
| CHEMICALS | guaiacols                  | guaiacols; guaiacol_derivatives                                                                                                                                                                                                                                                                                                             |  |
| CHEMICALS | vanillin                   | vanillin; natural_vanillin; vanillin_concentration; 13c_vanillin; vanillyl; vanillin_production                                                                                                                                                                                                                                             |  |
| CHEMICALS | vanillic_acid              | vanillic_acid; vanillic                                                                                                                                                                                                                                                                                                                     |  |
| CHEMICALS | dmsol                      | dmsol; dmsol_solvent; %_dimethylsulfoxide; dimethyl_sulfoxide@€"ionic_liquid_mixtures; dimethyl_sulfate; dimethylsulfone                                                                                                                                                                                                                    |  |
| CHEMICALS | aromatic_acids             | aromatic_acids; aromatic_organic_acids; aromatic_and_aliphatic_(short_chain_carboxylic_acids; major_aromatic_compounds; aromatic_organic_compounds                                                                                                                                                                                          |  |
| CHEMICALS | aliphatic_acids            | aliphatic_acids; aliphatic_short_chain_carboxylic_acids; aromatic_and_aliphatic_(short_chain_carboxylic_acids; short_chain_aliphatic_carboxylic_acids                                                                                                                                                                                       |  |
| CHEMICALS | syringaldehyde             | syringaldehyde; syringaldazine; acetosyringone                                                                                                                                                                                                                                                                                              |  |
| CHEMICALS | aldehydes                  | aldehydes; aldehydes/ketones; aliphatic_aldehydes; different_aldehydes; aliphatic_and_aromatic_aldehydes; linear_aldehydes; unsaturated_aldehydes                                                                                                                                                                                           |  |
| CHEMICALS | quinones                   | quinones; semiquinones; benzoquinones; hydroquinones; quinone_groups; semiquinone_type_radicals; quinone_intermediates; naphthoquinones; corresponding_quinones; quinonic_compounds; quinone                                                                                                                                                |  |
| CHEMICALS | cyclohexanol/_cyclohexanal | cyclohexanol; cyclohexanone_conversion; cyclohexanone_selectivity; cyclohexane_conversion; cyclohexanal; cyclohexane_conversion; cyclohexanone_selectivity                                                                                                                                                                                  |  |
| CHEMICALS | beta_keto_adipate          | beta_keto_adipate; l^2_ketoadipate_pathway                                                                                                                                                                                                                                                                                                  |  |
| CHEMICALS | substituted_lignins        | substituted_lignins; isolated_lignins; extracted_lignins; wood_lignins; treated_lignin; milled_wood_lignins; obtained_lignins; kraft_lignins; organosolv_lignins; wood_lignin; different_lignins                                                                                                                                            |  |
| CHEMICALS | triglyceride               | triglyceride; triglyceride_transesterification; triglyceride_conversion                                                                                                                                                                                                                                                                     |  |
| CHEMICALS | fatty_acids                | fatty_acids; fatty_acid_triglycerides; fatty_acid_esterification; several_fatty_acids; esterified_fatty_acids; various_fatty_acids; bacterial_fatty_acids; mainly_fatty_acids; total_fatty_acids; monounsaturated_fatty_acid; polyunsaturated_fatty_acids; predominant_fatty_acids; c16_fatty_acids; essential_fatty_acids; c18_fatty_acids |  |
| CHEMICALS | 1,3-propanediol            | 1,3-propanediol                                                                                                                                                                                                                                                                                                                             |  |
| CHEMICALS | propylene_glycol           | propylene_glycol                                                                                                                                                                                                                                                                                                                            |  |
| CHEMICALS | epichlorohydrin            | epichlorohydrin                                                                                                                                                                                                                                                                                                                             |  |
| CHEMICALS | dihydroxyacetone           | dihydroxyacetone; -dihydroxyacetone                                                                                                                                                                                                                                                                                                         |  |
| CHEMICALS | quinolines                 | quinolines; quinoline_derivatives; isoquinolines; tetrahydroquinolines; tetrahydroquinoline; -tetrahydroquinoline; polyquinoline                                                                                                                                                                                                            |  |
| CHEMICALS | acrolein                   | acrolein; acrolein_yield; renewable_acrolein_production                                                                                                                                                                                                                                                                                     |  |
| CHEMICALS | acrylic_acid               | acrylic_acid; poly_acrylic_acid; cyanoacrylic_acid; poly(acrylic_acid                                                                                                                                                                                                                                                                       |  |
| CHEMICALS | glycerol_carbonate         | glycerol_carbonate; glycerol_carbonate_synthesis                                                                                                                                                                                                                                                                                            |  |
| CHEMICALS | solketal                   | solketal; solketal_yield; glycerol_acetalization                                                                                                                                                                                                                                                                                            |  |
| CHEMICALS | nitroglycerine             | nitroglycerine                                                                                                                                                                                                                                                                                                                              |  |
| CHEMICALS | alanine                    | alanine; (alanine; l^2_alanine                                                                                                                                                                                                                                                                                                              |  |
| CHEMICALS | arginine                   | arginine                                                                                                                                                                                                                                                                                                                                    |  |
| CHEMICALS | aspartate                  | aspartate; l_aspartate; asparagine                                                                                                                                                                                                                                                                                                          |  |
| CHEMICALS | cysteine                   | cysteine; cystein; amino_acid_cysteine                                                                                                                                                                                                                                                                                                      |  |
| CHEMICALS | glutamine                  | glutamine                                                                                                                                                                                                                                                                                                                                   |  |
| CHEMICALS | histidine                  | histidine                                                                                                                                                                                                                                                                                                                                   |  |
| CHEMICALS | hydroxyproline             | hydroxyproline                                                                                                                                                                                                                                                                                                                              |  |
| CHEMICALS | isoleucine                 | isoleucine                                                                                                                                                                                                                                                                                                                                  |  |
| CHEMICALS | leucine                    | leucine                                                                                                                                                                                                                                                                                                                                     |  |
| CHEMICALS | lysine                     | lysine                                                                                                                                                                                                                                                                                                                                      |  |
| CHEMICALS | phenylalanine              | phenylalanine                                                                                                                                                                                                                                                                                                                               |  |
| CHEMICALS | proline                    | proline; proline_content; proline_derivatives; proline_concentrations; free_proline                                                                                                                                                                                                                                                         |  |
| CHEMICALS | serine                     | serine                                                                                                                                                                                                                                                                                                                                      |  |
| CHEMICALS | tryptophan                 | tryptophan; tryptophan_like_substances; tryptophan_like_component; tyrosine_like_proteins                                                                                                                                                                                                                                                   |  |
| CHEMICALS | threonine                  | threonine                                                                                                                                                                                                                                                                                                                                   |  |
| CHEMICALS | valine                     | valine                                                                                                                                                                                                                                                                                                                                      |  |
| CHEMICALS | glycine                    | glycine                                                                                                                                                                                                                                                                                                                                     |  |
| CHEMICALS | methionine                 | methionine; dl_methionine                                                                                                                                                                                                                                                                                                                   |  |
| CHEMICALS | tyrosine                   | tyrosine; tyrosine_like_proteins                                                                                                                                                                                                                                                                                                            |  |
| CHEMICALS | methyl_esters              | methyl_esters; methyl_ester; their_methyl_esters; their_methyl_ester; methyl_ester_production; oil_methyl_esters; fatty_acids_methyl_esters; oleic_acid_methyl_ester; methyl_ester_content; methyl_ester_conversion; lauric_acid_methyl_ester; acid_methyl_ester; fatty_acid_methyl_ester; rapeseed_oil_methyl_esters                       |  |
| CHEMICALS | formaldehyde               | formaldehyde; gaseous_formaldehyde; formaldehyde_gas; formaldehyde_formation; formaldehyde_conversion; formaldehyde_generation                                                                                                                                                                                                              |  |
| CHEMICALS | dimethylcarbonate          | dimethylcarbonate; dimethyl_carbonate                                                                                                                                                                                                                                                                                                       |  |
| CHEMICALS | mtbe                       | mtbe; methyl_tert_butyl_ether; methyl_tertiary_butyl_ether; (mtbe; methyl_t_butyl_ether                                                                                                                                                                                                                                                     |  |
| CHEMICALS | olefin                     | olefin; olefins; lower_olefin; olefin_conversion; olefin_formation; other_olefins; corresponding_olefins; lower_olefins; olefines; higher_olefins; it_olefins; olefin_production                                                                                                                                                            |  |
| CHEMICALS | isobutene                  | isobutene; isobutene_yield; isobutene_selectivity; iso_butene                                                                                                                                                                                                                                                                               |  |
| CHEMICALS | α-olefins                  | α-olefins; alpha_olefins                                                                                                                                                                                                                                                                                                                    |  |
| CHEMICALS | wax                        | wax; waxes; natural_waxes; synthetic_waxes; epicuticular_waxes; normal_paraffins; paraffinic_hydrocarbons                                                                                                                                                                                                                                   |  |
| CHEMICALS | 1,3-PDO                    | 1,3-PDO                                                                                                                                                                                                                                                                                                                                     |  |
| CHEMICALS | propylalcohol              | propylalcohol                                                                                                                                                                                                                                                                                                                               |  |
| CHEMICALS | epoxides                   | epoxides; epoxide; corresponding_epoxides; epoxidation; various_epoxides; other_epoxides; mono_epoxide; corresponding_epoxide; epoxide_product; epoxidation_process                                                                                                                                                                         |  |
| CHEMICALS | acrylates                  | acrylates; acrylate; acrylated; acrylate_groups; ethyl_acrylate; butyl_acrylate; diacrylate; methyl_acrylate                                                                                                                                                                                                                                |  |
| CHEMICALS | l-propylene_glycol         | l-propylene_glycol; propylene_glycol; bio_propylene_glycol; polyethylene_glycol_(peg                                                                                                                                                                                                                                                        |  |
| CHEMICALS | lactide                    | lactide; lactides; l_lactide; rac_lactide; poly(lactide; polylactides; d_lactide; polylactide; poly_lactide; poly(lactide_co_glycolide)_(plga); poly(l_lactide; poly_l_lactide; poly(l_lactic_acid; polyglycolide                                                                                                                           |  |
| CHEMICALS | acrylamides                | acrylamides; acrylamide                                                                                                                                                                                                                                                                                                                     |  |
| CHEMICALS | propionol                  | propionol                                                                                                                                                                                                                                                                                                                                   |  |
| CHEMICALS | 2-amino-1,3-PDO            | 2-amino-1,3-PDO                                                                                                                                                                                                                                                                                                                             |  |
| CHEMICALS | 2-aminomalonic             | 2-aminomalonic                                                                                                                                                                                                                                                                                                                              |  |
| CHEMICALS | amino-3HP                  | amino-3HP                                                                                                                                                                                                                                                                                                                                   |  |

|           |                                   |                                                                                                                                                                                                                                                                                                                                                                                                                                                                                                                                                                                                                                                                                                                                                                                                                                                                                                                                                                                                                                                                        |           |
|-----------|-----------------------------------|------------------------------------------------------------------------------------------------------------------------------------------------------------------------------------------------------------------------------------------------------------------------------------------------------------------------------------------------------------------------------------------------------------------------------------------------------------------------------------------------------------------------------------------------------------------------------------------------------------------------------------------------------------------------------------------------------------------------------------------------------------------------------------------------------------------------------------------------------------------------------------------------------------------------------------------------------------------------------------------------------------------------------------------------------------------------|-----------|
| CHEMICALS | thf                               | thf; tetrahydrofuran; tetrahydrofurane; tetrahydrofurans; thf_solvent; thf_solution; thf_solubles                                                                                                                                                                                                                                                                                                                                                                                                                                                                                                                                                                                                                                                                                                                                                                                                                                                                                                                                                                      |           |
| CHEMICALS | γ-butyrolactone                   | γ-butyrolactone; γ-butyrolactone; butyrolactone; γ-butyrolactone; γ-butyrolactone                                                                                                                                                                                                                                                                                                                                                                                                                                                                                                                                                                                                                                                                                                                                                                                                                                                                                                                                                                                      |           |
| CHEMICALS | pyrrolidones                      | pyrrolidones; pyrrolidone; -pyrrolidone; pyrrolidinone                                                                                                                                                                                                                                                                                                                                                                                                                                                                                                                                                                                                                                                                                                                                                                                                                                                                                                                                                                                                                 |           |
| CHEMICALS | 4,4-bionelle                      | 4,4-bionelle                                                                                                                                                                                                                                                                                                                                                                                                                                                                                                                                                                                                                                                                                                                                                                                                                                                                                                                                                                                                                                                           |           |
| CHEMICALS | hydroxybutyric acid               | hydroxybutyric acid; hydroxybutyric_acid; -hydroxybutyric                                                                                                                                                                                                                                                                                                                                                                                                                                                                                                                                                                                                                                                                                                                                                                                                                                                                                                                                                                                                              |           |
| CHEMICALS | hydroxybutyrolactone              | hydroxybutyrolactone                                                                                                                                                                                                                                                                                                                                                                                                                                                                                                                                                                                                                                                                                                                                                                                                                                                                                                                                                                                                                                                   |           |
| CHEMICALS | hydroxybutyrate                   | hydroxybutyrate; hydroxybutyrate; -hydroxybutyrate                                                                                                                                                                                                                                                                                                                                                                                                                                                                                                                                                                                                                                                                                                                                                                                                                                                                                                                                                                                                                     |           |
| CHEMICALS | epoxy-γ-butyrolactone             | epoxy-γ-butyrolactone                                                                                                                                                                                                                                                                                                                                                                                                                                                                                                                                                                                                                                                                                                                                                                                                                                                                                                                                                                                                                                                  |           |
| CHEMICALS | butenoic acid                     | butenoic_acid                                                                                                                                                                                                                                                                                                                                                                                                                                                                                                                                                                                                                                                                                                                                                                                                                                                                                                                                                                                                                                                          |           |
| CHEMICALS | butanediols                       | butanediols; butanediol; -butanediol                                                                                                                                                                                                                                                                                                                                                                                                                                                                                                                                                                                                                                                                                                                                                                                                                                                                                                                                                                                                                                   |           |
| CHEMICALS | butenols                          | butenols                                                                                                                                                                                                                                                                                                                                                                                                                                                                                                                                                                                                                                                                                                                                                                                                                                                                                                                                                                                                                                                               |           |
| CHEMICALS | δ-aminolevulinate                 | δ-aminolevulinate                                                                                                                                                                                                                                                                                                                                                                                                                                                                                                                                                                                                                                                                                                                                                                                                                                                                                                                                                                                                                                                      |           |
| CHEMICALS | 2-methyl_thf                      | 2-methyl_thf; methyl_tetrahydrofuran                                                                                                                                                                                                                                                                                                                                                                                                                                                                                                                                                                                                                                                                                                                                                                                                                                                                                                                                                                                                                                   |           |
| CHEMICALS | 1,4-diols                         | 1,4-diols                                                                                                                                                                                                                                                                                                                                                                                                                                                                                                                                                                                                                                                                                                                                                                                                                                                                                                                                                                                                                                                              |           |
| CHEMICALS | succinate                         | succinate; succinate_production; succinate_recovery; final_succinate_concentration; succinate_biosynthesis; bio_based_succinate; high_succinate_yield; bio_based_succinate_production                                                                                                                                                                                                                                                                                                                                                                                                                                                                                                                                                                                                                                                                                                                                                                                                                                                                                  |           |
| CHEMICALS | glycerol                          | glycerol; bio_glycerol_conversion; glycerol_concentrations; %_glycerol_conversion; glycerol_fraction; high_glycerol_conversion; crude_glycerol_combustion; biomass_glycerol; glycerol_combustion; only_glycerol; glycerol_aqueous_solution; glycerol_concentrations; residual_glycerol; crude_glycerol_addition; technical_glycerol; cinnamoyl_glycerol; biomass_glycerol; refined_glycerol                                                                                                                                                                                                                                                                                                                                                                                                                                                                                                                                                                                                                                                                            |           |
| CHEMICALS | lactate                           | lactate; lactate_concentration; lactate_production; lactate_accumulation; lactate_fermentation; only_lactate                                                                                                                                                                                                                                                                                                                                                                                                                                                                                                                                                                                                                                                                                                                                                                                                                                                                                                                                                           |           |
| CHEMICALS | hydroxy_furans                    | hydroxy_furans; hydroxy_methyl_furfural                                                                                                                                                                                                                                                                                                                                                                                                                                                                                                                                                                                                                                                                                                                                                                                                                                                                                                                                                                                                                                |           |
| CHEMICALS | 1,5-pentanediol                   | 1,5-pentanediol                                                                                                                                                                                                                                                                                                                                                                                                                                                                                                                                                                                                                                                                                                                                                                                                                                                                                                                                                                                                                                                        |           |
| CHEMICALS | caprolactam                       | caprolactam; ε-caprolactam; η-caprolactam; caprolactam_selectivity                                                                                                                                                                                                                                                                                                                                                                                                                                                                                                                                                                                                                                                                                                                                                                                                                                                                                                                                                                                                     |           |
| CHEMICALS | 1,5-diaminopentane                | 1,5-diaminopentane                                                                                                                                                                                                                                                                                                                                                                                                                                                                                                                                                                                                                                                                                                                                                                                                                                                                                                                                                                                                                                                     |           |
| CHEMICALS | gluconolactones                   | gluconolactones                                                                                                                                                                                                                                                                                                                                                                                                                                                                                                                                                                                                                                                                                                                                                                                                                                                                                                                                                                                                                                                        |           |
| CHEMICALS | monolactones                      | monolactones                                                                                                                                                                                                                                                                                                                                                                                                                                                                                                                                                                                                                                                                                                                                                                                                                                                                                                                                                                                                                                                           |           |
| CHEMICALS | isoboride                         | isoboride; isoboride_production; isoboride_conversion; isoboride_yield; %_isoboride_selectivity                                                                                                                                                                                                                                                                                                                                                                                                                                                                                                                                                                                                                                                                                                                                                                                                                                                                                                                                                                        |           |
| CHEMICALS | fuel_oxygenate                    | fuel_oxygenate; fuel_oxygenates; oxygenated_fuels; oxygenated_fuel_additives                                                                                                                                                                                                                                                                                                                                                                                                                                                                                                                                                                                                                                                                                                                                                                                                                                                                                                                                                                                           |           |
| CHEMICALS | antifreeze_and_deicers            | antifreeze_and_deicers; antifreeze; deicer                                                                                                                                                                                                                                                                                                                                                                                                                                                                                                                                                                                                                                                                                                                                                                                                                                                                                                                                                                                                                             |           |
| CHEMICALS | green_solvents                    | green_solvents; green_solvent; new_green_solvents; two_green_solvents; green_solvent_system; potential_green_solvents; alternative_solvents; conventional_solvents; conventional_organic_solvents; environmentally_benign_solvents; renewable_solvents; traditional_solvents; traditional_organic_solvents; solvents; selective_solvents                                                                                                                                                                                                                                                                                                                                                                                                                                                                                                                                                                                                                                                                                                                               |           |
| CHEMICALS | bio_emulsifiers                   | bio_emulsifiers; bio_emulsifier; emulsifiers; different_emulsifiers; emulsifier; emulsifier_production; emulsifying_agents; bioemulsifiers                                                                                                                                                                                                                                                                                                                                                                                                                                                                                                                                                                                                                                                                                                                                                                                                                                                                                                                             |           |
| CHEMICALS | chelating_agents                  | chelating_agents; chelating_agent; various_chelating_agents; organic_chelating_agents; different_chelating_agents                                                                                                                                                                                                                                                                                                                                                                                                                                                                                                                                                                                                                                                                                                                                                                                                                                                                                                                                                      |           |
| CHEMICALS | plasticizers                      | plasticizers; plasticizer; phthalate_plasticizers; plasticisers; bio_based_plasticizers; green_plasticizer; bio_plasticizer; plasticiser; bio_based_plasticizer                                                                                                                                                                                                                                                                                                                                                                                                                                                                                                                                                                                                                                                                                                                                                                                                                                                                                                        |           |
| CHEMICALS | bio_surfactant                    | bio_surfactant; bio_surfactants; two_surfactants; chemical_surfactants; surfactant; other_surfactants; surfactant_production; synthetic_surfactants; surfactant-; natural_surfactants; biodegradable_surfactants; mixed_surfactants; organic_surfactant; surfactant_present; different_surfactants; surfactant_type; organic_surfactants; surfactants                                                                                                                                                                                                                                                                                                                                                                                                                                                                                                                                                                                                                                                                                                                  |           |
| CHEMICALS | pharmaceutical                    | pharmaceutical; pharmaceutical_industries; pharmaceutical_processing; pharmaceutical_products; pharmaceutical_application; pharmaceutical_uses; pharmaceutical_research; pharmaceutical_production; pharmaceutical_materials; pharmaceutical_interest; pharmaceutical_product; pharmaceutical_processes; pharmaceutical_industry; pharmaceutical_applications; pharmaceuticals; pharmaceutical_and_chemical_industries; pharmaceutical_chemistry; pharmaceutical_manufacturing; pharmaceutical_sector; medical; medicine; medical_sciences; medical_science; medical_technology; clinical_medicine; hospital; clinical; biomedical; biomedical_sciences; transfusion_medicine; new_medical_devices; biomedical_engineering; medical_products; bio_medical_engineering; pediatrics; medical_application; biomedical_materials; medical_treatment; biomedical_research; conventional_medicine; traditional_medicine; personalized_medicine; modern_medicine; medicines; pharmacology; biological_medicines; biomedicine; veterinary_medicine; pharmacy; chinese_medicine |           |
| CHEMICALS | cosmetic                          | cosmetics; cosmetic_industry; cosmetic_products; cosmetic_applications; cosmetic_and_pharmaceutical_industries; pharmaceutical_and_cosmetic_industries; cosmetic_formulations; cosmetics_industry; cosmetics_products; cosmetics_and_pharmaceutical_industries; food_and_cosmetic_industries; natural_cosmetics; cosmetic_ingredients; cosmetology; modern_cosmetics                                                                                                                                                                                                                                                                                                                                                                                                                                                                                                                                                                                                                                                                                                   |           |
| MATERIALS |                                   |                                                                                                                                                                                                                                                                                                                                                                                                                                                                                                                                                                                                                                                                                                                                                                                                                                                                                                                                                                                                                                                                        | [1,4,7,8] |
| MATERIALS | polyethylene_(PE)                 | polyethylene; polyethylenes; low_density_polyethylene; (low_density_polyethylene; high_density_polyethylene; hdpe_high_density_polyethylene; linear_low_density_polyethylene; expanded_polyethylene; linear_polyethylene; co_pyrolysis_of_low_density_polyethylene; recycled_polyethylene; ldpe; hdpe; cross_linked_polyethylene; PE_plastic; high_density_polyethylene_geomembrane                                                                                                                                                                                                                                                                                                                                                                                                                                                                                                                                                                                                                                                                                    |           |
| MATERIALS | polymethylmethacrylate_(PMMA)     | polymethylmethacrylate; polymethacrylate; polymethyl_methacrylate; polymethacrylates; poly(methyl_methacrylate; pmma; pmma_plastic; (pmma; pmma_matrix; pmma_films                                                                                                                                                                                                                                                                                                                                                                                                                                                                                                                                                                                                                                                                                                                                                                                                                                                                                                     |           |
| MATERIALS | polyamide_(PA)                    | polyamide; polyamides; polyamide_membrane; bio_based_polyamide; polyamidoamine; PA_plastic; PA_nylon                                                                                                                                                                                                                                                                                                                                                                                                                                                                                                                                                                                                                                                                                                                                                                                                                                                                                                                                                                   |           |
| MATERIALS | polystyrene_(PS)                  | polystyrene; polystyrenes; expanded_polystyrene; sulfonated_polystyrene; petrol_based_polystyrene; extruded_polystyrene; high_impact_polystyrene; polystyrene_resins; chloromethylated_polystyrene; polystyrene_networks; tissue_culture_polystyrene; polystyrene_sulfonate; expanded_polyethylene; recycled_high_impact_polystyrene; polystyrene_beads; ps; (ps; ps_plastic; ps_production                                                                                                                                                                                                                                                                                                                                                                                                                                                                                                                                                                                                                                                                            |           |
| MATERIALS | polyurethane_(PU/PUR)             | polyurethane; polyurethane_foam; polyurethanes; polyurethane_foams; biopolyurethane; flexible_polyurethane_foam; polyurethane_resin; polyurethane_coating; polyurethane_sheets; flexible_polyurethane_foams; polyurethane_coatings; polyurethane_synthesis; rigid_polyurethane_foams; polyurethane_wood_adhesives; polyurethane_elastomer; thermoplastic_polyurethanes; biodegradable_polyurethane; hydrophilic_polyurethane; polyurethane_chemistry; polyurethane_sheets; PU_plastic; PUR_plastic                                                                                                                                                                                                                                                                                                                                                                                                                                                                                                                                                                     |           |
| MATERIALS | polyvinylchloride_(PVC)           | polyvinylchloride; polyvinyl_chloride; pvc; polyvinyl; poly(vinyl_chloride; PVC_plastic; (vinyl_chloride; poly_vinyl_chloride; plasticized_poly(vinyl_chloride; rigid_poly(vinyl_chloride; pvc_materials; chlorinated_polymers; pure_pvc; plasticized_poly(vinyl_chloride; polyvinyl; (pvc; pvc_products                                                                                                                                                                                                                                                                                                                                                                                                                                                                                                                                                                                                                                                                                                                                                               |           |
| MATERIALS | polyethylene_tetraphthalate_(PET) | polyethylene_tetraphthalate; polyethylene_terephthalate; pet_(polyethylene_terephthalate; flexible_polyethylene_terephthalate; polyethylene_terephthalate; polyethyleneterephthalate; pet; pet_plastic; pet_(polyethylene_terephthalate; poly(ethylene_terephthalate; pet_bottles; pet_like_plastic                                                                                                                                                                                                                                                                                                                                                                                                                                                                                                                                                                                                                                                                                                                                                                    |           |
| MATERIALS | polyethylether_ketone_(PEEK)      | polyethylether_ketone; polyetheretherketone; PEEK; PEEK_plastic                                                                                                                                                                                                                                                                                                                                                                                                                                                                                                                                                                                                                                                                                                                                                                                                                                                                                                                                                                                                        |           |
| MATERIALS | epoxies_(EP)                      | epoxies; epoxy_resins; epoxy; bio_based_epoxy_resins; epoxy_resin                                                                                                                                                                                                                                                                                                                                                                                                                                                                                                                                                                                                                                                                                                                                                                                                                                                                                                                                                                                                      |           |

|                            |                                          |                                                                                                                                                                                                                                                                                                                                                                                                                                                                                                                                                                                              |        |
|----------------------------|------------------------------------------|----------------------------------------------------------------------------------------------------------------------------------------------------------------------------------------------------------------------------------------------------------------------------------------------------------------------------------------------------------------------------------------------------------------------------------------------------------------------------------------------------------------------------------------------------------------------------------------------|--------|
| MATERIALS                  | elastomers_such_as_natural_rubber_(NR)   | elastomer; elastomer_composites; biodegradable_polyester_elastomers; bio_elastomers; polyurethane_elastomer; bioelastomer; biodegradable_elastomers; natural_rubber_latex; rubber; rubber_products; rubber_polymer; rubber_production; tire_rubber; rubber_industry; rubbers; ground_tire_rubber                                                                                                                                                                                                                                                                                             |        |
| MATERIALS                  | polybutylene_adipate_terephthalat_(PBAT) | polybutylene_adipate_terephthalat; poly(butylene_adipate_co_terephthalate)_ (pbat; adipate_co_terephthalate)_ (pbat; PBAT; PBAT_plastic                                                                                                                                                                                                                                                                                                                                                                                                                                                      |        |
| MATERIALS                  | polybutylene_succinate_(PBS)             | polybutylene_succinate; butylene_succinate; poly(butylene_succinate; polybutylene; poly_(butylene_succinate; biodegradable_poly(butylene_succinate; PBS; PBS_plastic                                                                                                                                                                                                                                                                                                                                                                                                                         |        |
| MATERIALS                  | polyhydroxy_alkanoate_(PHA)              | polyhydroxy_alkanoate; polyhydroxyalkanoate; polyhydroxyalkanoates; polyhydroxyalkanoates; polyhydroxyalkanoates_production; polyhydroxyalkanoate_synthesis; polyhydroxyalkanoate_production; medium_chain_length_polyhydroxyalkanoates; polyhydroxyalkanoates; mixed_culture_polyhydroxyalkanoate_production; pha_production; pha_productivity; hydroxyalkanoate; pha_production_process; pha_producers; pha_contents; pha_production_capacity; hydroxyalkanoates; pha_content; pha_synthesis; pha_accumulation; high_pha_content; pha_composition; polyhydroxyalkanoates; Pha_plastic; pha |        |
| MATERIALS                  | polylactic_acid_(PLA)                    | polylactic_acid; polylactic; biodegradable_polylactic_acid; poly(lactic_acid; pla; biodegradable_poly(lactic_acid; poly_lactic_acid; polylactide_polymers; poly_lactic_acid; (lactic_acid; poly(l_lactic_acid; (l_lactic_acid; poly_l_lactic_acid; lactic_acid_monomer; polylactide; polylactides; pla_composites; pla_products; neat_pla; poly(lactic; pla_blends; poly(lactide; pla_matrix; pure_pla; pla_properties; pla_processing; pla_based_materials                                                                                                                                  |        |
| MATERIALS                  | polypropylene_(PP)                       | polypropylene; porous_polypropylene; polypropylene_(pp; recycled_polyethylene; polypropylene_composites; polypropylene_matrix; linear_polyethylene; polypropylene_addition; PP_plastic                                                                                                                                                                                                                                                                                                                                                                                                       |        |
| MATERIALS                  | starch_blends                            | starch_blends; starch_blend; starch_based_plastics; starch_based_polymers; starch_based_polymer; starch_based_thermoplastics; starch_based_films; starch_based_materials; starch_based_products; corn_starch_based_films; starch_based_foams; biodegradable_thermoplastic_starch; starch_based_trays; starch_based_biomaterials; starch_polymers                                                                                                                                                                                                                                             |        |
| MATERIALS                  | polycarbonates_(PC)                      | polycarbonates; polycarbonate; aliphatic_polycarbonates; aliphatic_polycarbonate                                                                                                                                                                                                                                                                                                                                                                                                                                                                                                             |        |
| MATERIALS                  | polytrimethylene_terephthalate_(PTT)     | polytrimethylene_terephthalate; ptt; poly(trimethylene                                                                                                                                                                                                                                                                                                                                                                                                                                                                                                                                       |        |
| MATERIALS                  | styrene-butadiene_rubber_(SBR)           | styrene_butadiene_rubber; sbr                                                                                                                                                                                                                                                                                                                                                                                                                                                                                                                                                                |        |
| MATERIALS                  | polybutylene_terephthalate_(PBT)         | polybutylene_terephthalate; poly(butylene_terephthalate; pbt                                                                                                                                                                                                                                                                                                                                                                                                                                                                                                                                 |        |
| MATERIALS                  | furan-based_polymers                     | furan-based_polymers                                                                                                                                                                                                                                                                                                                                                                                                                                                                                                                                                                         |        |
| MATERIALS                  | polyesters                               | polyesters; biodegradable_polyesters; aliphatic_polyesters; other_polyesters; degradable_polyesters; aromatic_polyesters; unsaturated_polyesters; bio_based_polyesters; polyester; novel_polyesters; biodegradable_polyester; polyester_synthesis; biodegradable_thermoplastic_polyester; aliphatic_polyester                                                                                                                                                                                                                                                                                |        |
| MATERIALS                  | polyterpene_resins                       | polystyrene_resins                                                                                                                                                                                                                                                                                                                                                                                                                                                                                                                                                                           |        |
| MATERIALS                  | terpene-based_polymers                   | terpene-based_polymers                                                                                                                                                                                                                                                                                                                                                                                                                                                                                                                                                                       |        |
| MATERIALS                  | polyethylene_furanoate_(PEF)             | polyethylene_furanoate; PEF_plastic                                                                                                                                                                                                                                                                                                                                                                                                                                                                                                                                                          |        |
| MATERIALS                  | superabsorbent_polymers                  | superabsorbent_polymers                                                                                                                                                                                                                                                                                                                                                                                                                                                                                                                                                                      |        |
| MATERIALS                  | cellulose-based_polymers                 | cellulose-based_polymers; cellulose_polymers                                                                                                                                                                                                                                                                                                                                                                                                                                                                                                                                                 |        |
| MATERIALS                  | starch-based_polymers                    | starch-based_polymers; starch_based_polymers; starch_based_polymer                                                                                                                                                                                                                                                                                                                                                                                                                                                                                                                           |        |
| MATERIALS                  | lignin-based_polymers                    | lignin-based_polymers                                                                                                                                                                                                                                                                                                                                                                                                                                                                                                                                                                        |        |
| MATERIALS                  | cellulose_acetate_(CA)                   | cellulose_acetate; cellulose_acetates                                                                                                                                                                                                                                                                                                                                                                                                                                                                                                                                                        |        |
| MATERIALS                  | polyolefins                              | polyolefins; polyolefin                                                                                                                                                                                                                                                                                                                                                                                                                                                                                                                                                                      |        |
| MATERIALS                  | rosin                                    | rosin                                                                                                                                                                                                                                                                                                                                                                                                                                                                                                                                                                                        |        |
| MATERIALS                  | composites                               | composite; composites; natural_fiber_reinforced_composites; fiber_reinforced_composite_materials; natural_fiber_polymer_composites; reinforced_epoxy_composites; reinforced_polymer_composites; reinforced_composites; natural_fibre_composites; composites; green_composite; hybrid_composite; other_composite_materials                                                                                                                                                                                                                                                                    |        |
| MATERIALS                  | carbon_fiber                             | carbon_fiber; carbon_fibres; carbon_fiber_textiles                                                                                                                                                                                                                                                                                                                                                                                                                                                                                                                                           |        |
| MATERIALS                  | natural_fiber_/plant_fiber               | plant_fiber; plant_fibers; plant_fibres; natural_fiber; bamboo_fiber; cellulose_fiber; natural_cellulose_fiber; cellulosic_fiber; natural_cellulose_fibers; cellulose_fibers; wood_fibers; wood_fiber; lignocellulosic_fiber; natural_fibers; natural_fibre; agricultural_fibers; a_natural_fibers; natural_fibres; sisal_fiber; lignocellulosic_fibers; kenaf_fiber                                                                                                                                                                                                                         |        |
| MATERIALS                  | wood-based_boards                        | wood-based_boards; wood_based_panels; wood_panels; particleboard_production; wood_particleboard; wood_based_panel; fiberboards; particleboards; cement_bonded_particleboards; fibreboards; particleboard; wood_based_products; particleboard_manufacture                                                                                                                                                                                                                                                                                                                                     |        |
| MATERIALS                  | biobased_paint                           | biobased_paint; paint; paints                                                                                                                                                                                                                                                                                                                                                                                                                                                                                                                                                                |        |
| MATERIALS                  | bioadhesive                              | bioadhesive; bioadhesives; bio_adhesive; adhesive                                                                                                                                                                                                                                                                                                                                                                                                                                                                                                                                            |        |
| MATERIALS                  | biofilter                                | biofilter; biofilters; biofilter_unit; biofilter_material; biofilter_media; biofiltration_system; compost_biofilter; organic_biofilter; two_biofilters; biofiltration; biofiltration_column; pilot_scale_biofilter; all_the_biofilters; biofiltration_columns; water_biofiltration; biofiltration_processes                                                                                                                                                                                                                                                                                  |        |
| MATERIALS                  | microbial_media                          | microbial_growth_media; microbial_substrates; microbial_substrate; microbial_cultivation; growing_substrate; growing_medium                                                                                                                                                                                                                                                                                                                                                                                                                                                                  |        |
| MATERIALS                  | greenhouse_substrate                     | greenhouse_substrate; plant_growth_medium; soilless_substrates                                                                                                                                                                                                                                                                                                                                                                                                                                                                                                                               |        |
| MATERIALS                  | bio-absorbent                            | bio-absorbent; absorbent; absorbents; bioabsorbent; renewable_absorbent; adsorption_material; adsorbent; potential_adsorbent; efficient_adsorption_material; alternative_adsorbent; adsorbent_material; good_adsorbent; adsorption_materials; efficient_adsorbent                                                                                                                                                                                                                                                                                                                            |        |
| MATERIALS                  | bio-desiccant                            | bio-desiccant                                                                                                                                                                                                                                                                                                                                                                                                                                                                                                                                                                                |        |
| MATERIALS                  | bedding_material                         | bedding_material; animal_bedding; sawdust_bedding; straw_bedding; sheep_bedding; bedding_materials; bedding; farm_bedding                                                                                                                                                                                                                                                                                                                                                                                                                                                                    |        |
| MATERIALS                  | fertilizer                               | fertilizer; potential_fertilizer; valuable_fertilizer; commercial_fertilizers; other_fertilizers; waste_compost; organic_waste_compost                                                                                                                                                                                                                                                                                                                                                                                                                                                       |        |
| MATERIALS                  | compost                                  | compost; composting; organic_waste_composts; waste_compost; organic_waste_compost                                                                                                                                                                                                                                                                                                                                                                                                                                                                                                            |        |
| MATERIALS                  | soil_improver                            | soil_improver; soil_improvers; top_soil_improvers; soil_improvements; beneficial_soil_amendment; valuable_soil_amendment; common_soil_amendment; agricultural_soil_amendments; good_soil_amendment; soil_conditioner; soil_amendment; soil_improvement; soil_amender; biochar_soil_amendment; soil_amenders; pathogen_free_soil_amendments; soil_improvering; organic_waste_soil_improvers; waste_soil_improver; organic_waste_soil_improver                                                                                                                                                 |        |
| ENERGY; CHEMICALS & ENERGY |                                          |                                                                                                                                                                                                                                                                                                                                                                                                                                                                                                                                                                                              | [9-15] |
| ENERGY                     | dedicated_combustion_/incineration       | dedicated_combustion; combustion; firing; co-combustion; incineration; co-firing; proper_combustion; combustion_purposes; different_combustion_processes; high_temperature_combustion_processes; (l_combustion; advanced_combustion; co_firing_technology; co_firing_plants; co_firing_potential; co_firing_case; co_firing_power_generation; co_firing_applications; coal/biomass_combustion; lignite_combustion; soot_combustion; thermal_power_stations; incineration_methods; incineration_technologies; incinerate; incineration_facilities; mass_burn_incineration                     |        |

|                    |                          |                                                                                                                                                                                                                                                                                                                                                                                                                                                                                                                                                                                                                                                                                                                                                                                                                                                                                                                                                                                                                                                                                                                                                                                                                                                                                                                                                                                                                                                                                                                                                                                                        |            |
|--------------------|--------------------------|--------------------------------------------------------------------------------------------------------------------------------------------------------------------------------------------------------------------------------------------------------------------------------------------------------------------------------------------------------------------------------------------------------------------------------------------------------------------------------------------------------------------------------------------------------------------------------------------------------------------------------------------------------------------------------------------------------------------------------------------------------------------------------------------------------------------------------------------------------------------------------------------------------------------------------------------------------------------------------------------------------------------------------------------------------------------------------------------------------------------------------------------------------------------------------------------------------------------------------------------------------------------------------------------------------------------------------------------------------------------------------------------------------------------------------------------------------------------------------------------------------------------------------------------------------------------------------------------------------|------------|
| ENERGY             | briquette/_pellet_fuel   | briquette; pellet_fuel; pellet; briquetted; densification; pelletization; (briquettes; briquette_fuel; briquette_production; bio_briquettes; briquette_producers; biomass_briquette_fuel; biomass_briquetting; fuel_pellet_production; pellet_combustion; fuel_pellets_production; pellet_producers; pelletizing_process; biofuel_pellets; densified_fuel; pellet_plants; large_scale_pellet_production; biomass_pellet; fuel_pellet; pelletized; fuel_pellet_production; densification_processes; densification_technologies; pelletization_process; co_pelletization; produced_pellets; pelletizing_properties; biomass_densification; densified_biomass; pelletised; pelletized_biomass; pelleting_process                                                                                                                                                                                                                                                                                                                                                                                                                                                                                                                                                                                                                                                                                                                                                                                                                                                                                          |            |
| ENERGY             | torrefaction             | torrefaction; torrefied_biomass; torrefied_biomass_samples; torrefied_biomass_pellets; torrefied_mä; torrefied_gc; torrefied_sample; torrefied_wood; torrefied_pks; torrefaction_processes; torrefaction_treatment; torrefaction_technology; biomass_torrefaction_process; torrefied; torrefaction_plant                                                                                                                                                                                                                                                                                                                                                                                                                                                                                                                                                                                                                                                                                                                                                                                                                                                                                                                                                                                                                                                                                                                                                                                                                                                                                               |            |
| ENERGY             | biodiesel                | biodiesel; renewable_biodiesel_production; integrated_biodiesel_production; enhanced_biodiesel_production; further_biodiesel_production; potential_biodiesel_production; (biodiesel; karanja_biodiesel_production; biodiesel_producer; commercial_biodiesel; biodiesel_fuel_production; derived_biodiesel; fame_diesel; oleic_acid_methyl_ester; oil_methyl_esters; obtained_biodiesels; fatty_acid_methyl_ester; biodieselâ€ diesel_blends; three_biodiesels; pure_biodiesel; fatty_acid_methyl_ester_(fame; biodiesel_blend; neat_biodiesel; faee_diesel; reference_diesel; abe_diesel_blends; real_diesel; pure_diesel; diesel_fuel; renewable_diesel_fuels; synthetic_diesel; fischer_tropsch_diesel; ft_diesel; diesel_fuel_production; fischer_tropsch_fuels; renewable_diesel_fuels; syndiesel; synthetic_diesel; fischer-tropsch_biodiesel; fischerâ€ tropsch_fuels; fischer_tropsch_fuels; fischer_tropsch_(ft; ft_biodiesel; ft_biofuels; neat_biodiesel; product_biodiesel; e.g._biodiesel; biodiesel_scenario; resultant_biodiesel; pure_biodiesel; first_generation_biodiesel; resulting_biodiesel; obtained_biodiesel; renewable_diesel; renewable_diesel_fuels; renewable_diesel_production; renewable_jet_fuel_process; diesel_fuel_production; green_diesel_fractions; renewable_biodiesel_production; green_diesel; green_diesel_fractions; renewable_diesel_fuels; renewable_diesel_production; diesel_fuel_range; diesel_fuel_production; synthetic_diesel; diesel_fuels; hrd; diesel_product; green_diesel_fractions; htu_diesel; renewable_diesel_fuels; alternative_diesel_fuel | [13,16-18] |
| ENERGY             | bio_jet_fuel             | bio_jet_fuel; alcohol-to-jet; oil-to-jet; hefa-sp; sugar-to-jet; gas-to-jet; ft-sp; ft-ska; bio_aviation_fuel; synthetic_jet_fuel; synthetic_aviation_fuel; bio_kerosene; bio_jet_fuel_production; bio_jet_fuel_yield; renewable_jet_fuel_process; alternative_jet_fuels; hydrotreated_renewable_jet_fuel; jet_fuel_production; jp_jet_fuel; biojet_fuel_production; biomass_derived_jet_fuel; biojet_fuel; alternative_jet_fuels; renewable_jet_fuel_process; biomass_derived_jet_fuel; hydrotreated_renewable_jet_fuel; biofuelsâ€ aviation_biofuels; jet_fuel_production; bio_jet_fuel_production; hefa; bio_aviation_fuels; renewable_aviation_fuel; aviation_fuels; alternative_aviation_fuels; bio_based_aviation_fuels; aviation_biofuels; renewable_jet_fuel_process; jet_fuel_production; alternative_jet_fuels; biomass_derived_jet_fuel; renewable_jet_fuel_process; bio_jet_fuel_production; jp_jet_fuel; hydrotreated_renewable_jet_fuel; aviation_fuel; traditional_jet_fuels; aviation_fuels; renewable_aviation_fuel; bio_based_aviation_fuels; aviation_fuels; alternative_aviation_fuels; bio_aviation_fuels; bio_aviation_fuel; aviation_bio_kerosene; paraffinic_kerosene; %_kerosene; synthetic_paraffinic_kerosene; biokerosene; pure_kerosene; aviation_biofuels; aviation_fuels                                                                                                                                                                                                                                                                                                | [19-23]    |
| ENERGY             | waste_vegetable_oil_fuel | waste_vegetable_oil_fuel                                                                                                                                                                                                                                                                                                                                                                                                                                                                                                                                                                                                                                                                                                                                                                                                                                                                                                                                                                                                                                                                                                                                                                                                                                                                                                                                                                                                                                                                                                                                                                               |            |
| ENERGY             | biogasoline              | gasoline; e.g._gasoline; bio_gasoline; renewable_gasoline; green_gasoline; gasoline_production; bio_gasoline_production; %_gasoline; synthetic_gasoline; commercial_gasoline; biorenewable_gasoline; gasoline_products; aviation_gasoline; pure_gasoline                                                                                                                                                                                                                                                                                                                                                                                                                                                                                                                                                                                                                                                                                                                                                                                                                                                                                                                                                                                                                                                                                                                                                                                                                                                                                                                                               |            |
| CHEMICALS_&_ENERGY | syngas                   | syngas; syngas_product; syngas_components; syngas_mixture; obtained_syngas; syngas_mixtures; clean_syngas_production; (syngas; synthesis_gases; syngas_combustion; enhanced_syngas_production; generated_syngas; synthetic_gas; synthetic_gasification_gas; bio_synthetic_gas; synthetic_gas_(syngas; synthetic_gas_mixtures; raw_synthesis_gas; clean_synthesis_gas; synthetic_gasified_biomass; produced_synthesis_gas; synthetic_fuel_gas; rich_synthesis_gas; high_quality_synthesis_gas; clean_hydrogen_rich_synthesis_gas                                                                                                                                                                                                                                                                                                                                                                                                                                                                                                                                                                                                                                                                                                                                                                                                                                                                                                                                                                                                                                                                        |            |
| CHEMICALS_&_ENERGY | biohydrogen              | biohydrogen; biohydrogen_production_processes; biohydrogen_gas; dark_fermentative_biohydrogen_production; biohydrogen_production_systems; biohydrogen_production_pathways; biohydrogen_production_technologies; lignocellulosic_biohydrogen_production; fermentative_biohydrogen; biohydrogen_yields; chapter_biohydrogen_production; fermentative_hydrogen_production_process; dark_fermentation; dark_fermentations; (dark_fermentation; dark_fermentation_processes; dark_fermentation_system; dark_fermentation_hydrogen_production; dark_fermentative_bio_hydrogen_production; dark_fermentation_technology; hydrogen_dark_fermentation; dark_fermentative_biohydrogen_production; batch_dark_fermentation; sequential_dark_fermentation; anaerobic_dark_fermentation; photobiological_hydrogen; photobiological_hydrogen_production; microbiological_hydrogen_production; photoelectrochemical_hydrogen_production; continuous_photo_fermentative_hydrogen_production; hydrogen_photoproduction; biochemical_hydrogen_potential; microbial_hydrogen_production; hydrogen_dark_fermentation; biological_h2_production; photosynthesis_hydrogen; bacterial_photosynthesis; photoautotrophic_hydrogen; photoheterotrophic_hydrogen; photobiological_hydrogen_production; photosynthetic_bacterium_rhodobacter_sphaeroides; sequential_dark_and_photo_fermentation_process; photo_fermentative_h2_production; dark_fermentation_hydrogen_production; dark_and_photo_fermentation_processes                                                                                                           |            |
| CHEMICALS_&_ENERGY | pyrolysis_oil            | pyrolysis_oil_products; upgraded_pyrolysis_oil; produced_pyrolysis_oil; crude_pyrolysis_oil; co_pyrolysis_oil; upgraded_pyrolysis_oils; raw_pyrolysis_oil; flash_pyrolysis_oil; pyrolysis_oil_production; produced_pyrolysis_oils; pyrolysis_oil_combustion; fast_pyrolysis_oil_(po; biocrude; bio-oil; ht_l_biocrude; hydrothermal_liquefaction_biocrude; biocrude_oil_yield; biocrude_upgrading; biocrude_quantity; biocrude_oil_production; total_biocrude_yield; two_biocrudes; maximum_biocrude_oil_yield; hydrothermal_liquefaction                                                                                                                                                                                                                                                                                                                                                                                                                                                                                                                                                                                                                                                                                                                                                                                                                                                                                                                                                                                                                                                              | [24,25]    |
| CHEMICALS_&_ENERGY | ethanol/_bioethanol      | ethanol, bioethanol, combined_ethanol; either_ethanol; subsequent_ethanol_production; ethanol_producer; commercial_ethanol; ethanol_processing; >ethanol; w/w)_ethanol; higher_ethanol_conversion; based_ethanol_production; first_generation_bioethanol_production; industrial_bioethanol_production; bioethanol_fuel; sustainable_bioethanol_production; advanced_bioethanol_production; integrated_bioethanol_production; bioethanol_processing; bioethanol_production_processes; second_generation_bioethanol_production_plant; first_and_second_generation_bioethanol_production; first_and_second_generation_bioethanol; produced_bioethanol; bioethanol_conversion                                                                                                                                                                                                                                                                                                                                                                                                                                                                                                                                                                                                                                                                                                                                                                                                                                                                                                                              | [26,27]    |
| CHEMICALS_&_ENERGY | methanol                 | methanol                                                                                                                                                                                                                                                                                                                                                                                                                                                                                                                                                                                                                                                                                                                                                                                                                                                                                                                                                                                                                                                                                                                                                                                                                                                                                                                                                                                                                                                                                                                                                                                               | [28,29]    |
| CHEMICALS_&_ENERGY | butanol                  | butanol; acetoneâ€ butanol; (n_butanol; acetone_n_butanol_ethanol; butanol_conversion; acetone_butanol_ethanol_mixture; butanol; isopropanol_n_butanol_ethanol; n_butanol_conversion; l_butanol; acetoneâ€ butanol_fermentation; butanol_concentration                                                                                                                                                                                                                                                                                                                                                                                                                                                                                                                                                                                                                                                                                                                                                                                                                                                                                                                                                                                                                                                                                                                                                                                                                                                                                                                                                 |            |
| CHEMICALS_&_ENERGY | dimethylfuran            | dimethylfuran                                                                                                                                                                                                                                                                                                                                                                                                                                                                                                                                                                                                                                                                                                                                                                                                                                                                                                                                                                                                                                                                                                                                                                                                                                                                                                                                                                                                                                                                                                                                                                                          |            |
| CHEMICALS_&_ENERGY | dimethylether_(DME)      | dimethylether; dimethylether_(dme; dimethyl_ether; dimethyl_ether_production; di_methyl_ether; dimethyl_ether_synthesis; dme; bio_dimethyl_ether; bio-dme; bio_dimethyl_ether; single_step_dimethyl_ether_synthesis; dme_production; direct_dme_synthesis; dme_synthesis; dme_production; dme_yield                                                                                                                                                                                                                                                                                                                                                                                                                                                                                                                                                                                                                                                                                                                                                                                                                                                                                                                                                                                                                                                                                                                                                                                                                                                                                                    | [29-32]    |
| CHEMICALS_&_ENERGY | bioethers                | bioethers                                                                                                                                                                                                                                                                                                                                                                                                                                                                                                                                                                                                                                                                                                                                                                                                                                                                                                                                                                                                                                                                                                                                                                                                                                                                                                                                                                                                                                                                                                                                                                                              |            |

## References

1. Davis, C.B.; Aid, G.; Zhu, B. Secondary Resources in the Bio-Based Economy: A Computer Assisted Survey of Value Pathways in Academic Literature. *Waste and Biomass Valorization*
2. Vlaamse, K.; Van Belgie, A. *Industrial Biomass: Source of Chemicals, Materials, and Energy* ; 2010;
3. Werpy, T.; Petersen, G. Top Value Added Chemicals from Biomass: Volume I -- Results of Screening for Potential Candidates from Sugars and Synthesis Gas. Office of Scientific and Technical Information (OSTI). *Off. Sci. Tech. Inf.* **2004**, 69, doi:10.2172/15008859.
4. Clark, J.; Deswarte, F. *Introduction to Chemicals from Biomass* ; Clark, J., Deswarte, F., Eds.; Wiley, 2015; Vol. 9781118714485; ISBN 9781118714485.
5. Holladay, J.E.; Bozell, J.J.; White, J.F.; Johnson, D. *Top Value-Added Chemicals from Biomass - Volume II—Results of Screening for Potential Candidates from Biorefinery Lignin* ; 2007;
6. van Ree, R.; de Jong, E.; Kwant, K. *Task 42 - Biobased Chemicals value added products from biorefineries* ; 2012;
7. Ashby, M.F.; Jones, D.R.H. (David R.H. *Engineering materials 1 : an introduction to properties, applications and design* ; Elsevier Butterworth-Heinemann, 2005; ISBN 9780080468624.
8. Mirabal, A.S.; Scholz, L.; Carus, M. *Market study on Bio-based Polymers in the World Capacities, Production and Applications: Status Quo and Trends towards 2020* ; 2013;
9. Biofuel Biofuels - Types of Biofuels Available online: <http://biofuel.org.uk/types-of-biofuels.html> (accessed on Apr 18, 2020).
10. Physics Energy – The Physics Hypertextbook Available online: <https://physics.info/energy/> (accessed on Apr 18, 2020).
11. Ho, D.P.; Ngo, H.H.; Guo, W. A mini review on renewable sources for biofuel. *Bioresour. Technol.* **2014**, *169*, 742–749.
12. Mustafa, N. What are the differences between (bio-jet, bio-ethanol and bio-diesel)? Available online: [https://www.researchgate.net/post/What\\_are\\_the\\_differences\\_between\\_bio-jet\\_bio-ethanol\\_and\\_bio-diesel](https://www.researchgate.net/post/What_are_the_differences_between_bio-jet_bio-ethanol_and_bio-diesel) (accessed on Apr 18, 2020).
13. Bauen, Ausilio; Berndes, Göran; Junginger, Martin; Londo, Marc; Vuille, F. *KEY MESSAGES BIOENERGY-A SUSTAINABLE AND RELIABLE ENERGY SOURCE A review of status and prospects* ; 2009;
14. Basu, P. *Biomass Gasification, Pyrolysis and Torrefaction: Practical Design and Theory* ; Elsevier Inc., 2013; ISBN 9780123964885.
15. Wikipedia Vegetable oil fuel - Wikipedia Available online: [https://en.wikipedia.org/wiki/Vegetable\\_oil\\_fuel](https://en.wikipedia.org/wiki/Vegetable_oil_fuel) (accessed on Apr 18, 2020).
16. Beta Analytic Hydrogenation-Derived Renewable Diesel - ASTM D6866 Available online: <https://www.betalabservices.com/biofuels/renewable-diesel-hdrd.html> (accessed on Apr 18, 2020).
17. Wikipedia Diesel fuel - Wikipedia Available online: [https://en.wikipedia.org/wiki/Diesel\\_fuel#Synthetic\\_diesel](https://en.wikipedia.org/wiki/Diesel_fuel#Synthetic_diesel) (accessed on Apr 18, 2020).
18. Elobio HTU diesel Available online: <https://www.elobio.eu/biofuels/htu-diesel/> (accessed on Apr 18, 2020).
19. US Federal Aviation Administration New Alternative Jet Fuel Approved Available online: [https://www.faa.gov/news/updates/?newsId=85425&omniRss=news\\_updatesAoc&cid=101\\_N\\_U](https://www.faa.gov/news/updates/?newsId=85425&omniRss=news_updatesAoc&cid=101_N_U) (accessed on Apr 18, 2020).
20. ICAO *ICAO Environmental Report- Aviation and Climate Change* ; 2010;
21. Wikipedia Aviation biofuel - Wikipedia Available online: [https://en.wikipedia.org/wiki/Aviation\\_biofuel](https://en.wikipedia.org/wiki/Aviation_biofuel) (accessed on Apr 18, 2020).
22. Wikipedia Jet fuel - Wikipedia Available online: [https://en.wikipedia.org/wiki/Jet\\_fuel](https://en.wikipedia.org/wiki/Jet_fuel) (accessed on Apr 18, 2020).
23. Wang, W.C.; Tao, L. Bio-jet fuel conversion technologies. *Renew. Sustain. Energy Rev.* **2016**, *53*, 801–822.
24. Wikipedia Pyrolysis oil - Wikipedia Available online: [https://en.wikipedia.org/wiki/Pyrolysis\\_oil](https://en.wikipedia.org/wiki/Pyrolysis_oil) (accessed on Apr 18, 2020).
25. Sadaka, Sammy; Boateng, A.A. *Agriculture and Natural Resources* .
26. Devarapalli, M.; Atiyeh, H.K. A review of conversion processes for bioethanol production with a focus on syngas fermentation. *Biofuel Res. J.* **2015**, *7*, 268–280,
27. Zabel, H.; Sahu, J.N.; Suely, A.; Boyce, A.N.; Faruq, G. Bioethanol production from renewable sources: Current perspectives and technological progress. *Renew. Sustain. Energy Rev.* **2017**, *71*, 475–501.
28. Markowska, A.; Michalkiewicz, B. Biosynthesis of methanol from methane by *Methylosinus trichosporium* OB3b. *Chem. Pap.* **2009**, *63*, 105–110, doi:10.2478/s11696-008-0100-5.
29. Thuijl, E.V.; Ree, R.V.; Lange, T.J.D. *Biofuel Production Chains: Background Document for Modelling the EY Biofuel Market using the BIOTRANS Model* ; 2003;
30. De Falco, M. *Dimethyl Ether (DME) Production* ;
31. Wikipedia Dimethyl ether - Wikipedia Available online: [https://en.wikipedia.org/wiki/Dimethyl\\_ether](https://en.wikipedia.org/wiki/Dimethyl_ether) (accessed on Apr 18, 2020).
32. Azizi, Z.; Rezaeimanesh, M.; Tohidian, T.; Rahimpour, M.R. Dimethyl ether: A review of technologies and production challenges. *Chem. Eng. Process. Process Intensif.* **2014**, *82*,
