# Supplementary material
Source: MDPI journal article supplement (https://www.mdpi.com/1996-1073/13/11/2747)
Supplement: s1 [file s1 › z.Appendix C - List of validated co-occurrences.pdf]

# Appendix C: List of validated co-occurrences

| NO                                                                  | BIOMASS                  | APPLICATION                        | THE CO-OCCURRENCE REPRESENTS THE ASSUMED CONNECTION | PERCENTAGE of the co-occurrence which represents the assumed connection over total validated co-occurrences | REFERENCES |
|---------------------------------------------------------------------|--------------------------|------------------------------------|-----------------------------------------------------|-------------------------------------------------------------------------------------------------------------|------------|
| Type of validation: top most frequent co-occurrences (f ∈ [20;238]) |                          |                                    |                                                     | 95%                                                                                                         |            |
| 1                                                                   | organic_housewaste       | compost                            | yes                                                 |                                                                                                             | [1]        |
| 2                                                                   | organic_housewaste       | dedicated_combustion/_incineration | yes                                                 |                                                                                                             | [2]        |
| 3                                                                   | glycerol                 | biodiesel                          | yes                                                 |                                                                                                             | [3]        |
| 4                                                                   | food_leftovers           | compost                            | yes                                                 |                                                                                                             | [4]        |
| 5                                                                   | glycerol                 | ethanol/_bioethanol                | yes                                                 |                                                                                                             | [5]        |
| 6                                                                   | glycerol                 | methanol                           | yes                                                 |                                                                                                             | [6]        |
| 7                                                                   | maize_stover             | ethanol/_bioethanol                | yes                                                 |                                                                                                             | [7]        |
| 8                                                                   | poultry_manure           | compost                            | yes                                                 |                                                                                                             | [8]        |
| 9                                                                   | pig_manure               | compost                            | yes                                                 |                                                                                                             | [9]        |
| 10                                                                  | animal_fats              | biodiesel                          | yes                                                 |                                                                                                             | [10]       |
| 11                                                                  | cattle_manure            | compost                            | yes                                                 |                                                                                                             | [11]       |
| 12                                                                  | glycerol                 | acetic_acid                        | no                                                  |                                                                                                             |            |
| 13                                                                  | food_leftovers           | biohydrogen                        | yes                                                 |                                                                                                             | [12]       |
| 14                                                                  | glycerol                 | fatty_acids                        | yes                                                 |                                                                                                             | [13]       |
| 15                                                                  | sugar_beet_melasse       | ethanol/_bioethanol                | yes                                                 |                                                                                                             | [14]       |
| 16                                                                  | glycerol                 | ethylene_glycol                    | yes                                                 |                                                                                                             | [15]       |
| 17                                                                  | rice_straw               | ethanol/_bioethanol                | yes                                                 |                                                                                                             | [16]       |
| 18                                                                  | food_leftovers           | dedicated_combustion/_incineration | yes                                                 |                                                                                                             | [17]       |
| 19                                                                  | organic_housewaste       | ethanol/_bioethanol                | yes                                                 |                                                                                                             | [18]       |
| 20                                                                  | champost                 | compost                            | yes                                                 |                                                                                                             | [19]       |
| 21                                                                  | wheat_straw              | ethanol/_bioethanol                | yes                                                 |                                                                                                             | [20]       |
| Type of validation: co-occurrences happened once                    |                          |                                    |                                                     | 40%                                                                                                         |            |
| 1                                                                   | animal_bloodmeal         | compost                            | no                                                  |                                                                                                             |            |
| 2                                                                   | apple_pomace             | arginine                           | no                                                  |                                                                                                             |            |
| 3                                                                   | barley_straw             | acetic_acid                        | no                                                  |                                                                                                             |            |
| 4                                                                   | cattle_manure            | biofilter                          | yes                                                 |                                                                                                             | [21]       |
| 5                                                                   | champost                 | olefin                             | no                                                  |                                                                                                             |            |
| 6                                                                   | cocoa_shell              | briquette/_pellet_fuel             | yes                                                 |                                                                                                             | [22]       |
| 7                                                                   | distillers_grains        | briquette/_pellet_fuel             | yes                                                 |                                                                                                             | [23]       |
| 8                                                                   | distillers_grains        | valine                             | no                                                  |                                                                                                             |            |
| 9                                                                   | fish_meal                | styrene-butadiene_rubber_(sbr)     | no                                                  |                                                                                                             |            |
| 10                                                                  | food_leftovers           | xylitol                            | no                                                  |                                                                                                             |            |
| 11                                                                  | glycerol                 | hydroxyproline                     | no                                                  |                                                                                                             |            |
| 12                                                                  | glycerol                 | vanillin                           | no                                                  |                                                                                                             |            |
| 13                                                                  | maize_stover             | adipic_acid                        | yes                                                 |                                                                                                             | [24]       |
| 14                                                                  | malt_coffee_marc         | acetic_acid                        | no                                                  |                                                                                                             |            |
| 15                                                                  | meadow_hay               | acetic_acid                        | no                                                  |                                                                                                             |            |
| 16                                                                  | organic_housewaste       | fructose                           | yes                                                 |                                                                                                             | [25]       |
| 17                                                                  | pig_manure               | bio-absorbent                      | yes                                                 |                                                                                                             | [26]       |
| 18                                                                  | potato_peel              | acetone                            | yes                                                 |                                                                                                             | [27]       |
| 19                                                                  | rapeseed_extraction_meal | acetic_acid                        | no                                                  |                                                                                                             |            |
| 20                                                                  | rice_straw               | fatty_acids                        | yes                                                 |                                                                                                             | [28]       |
| Type of validation: unexpected co-occurrences                       |                          |                                    |                                                     | 58%                                                                                                         |            |
| 1                                                                   | animal_feather_meal      | pharmaceutical                     | yes                                                 |                                                                                                             | [29]       |
| 2                                                                   | banana_peel              | biogasoline                        | yes                                                 |                                                                                                             | [30]       |
| 3                                                                   | cattle_manure            | acetone                            | yes                                                 |                                                                                                             | [31]       |
| 4                                                                   | cattle_manure            | ethanol/_bioethanol                | yes                                                 |                                                                                                             | [32]       |
| 5                                                                   | cattle_manure            | methanol                           | no                                                  |                                                                                                             |            |
| 6                                                                   | champost                 | biohydrogen                        | yes                                                 |                                                                                                             | [33]       |
| 7                                                                   | pig_manure               | biodiesel                          | yes                                                 |                                                                                                             | [34]       |
| 8                                                                   | organic_housewaste       | polyamide_(pa)                     | no                                                  |                                                                                                             |            |
| 9                                                                   | organic_housewaste       | polybutylene_terephthalate_(pbt)   | no                                                  |                                                                                                             |            |
| 10                                                                  | organic_housewaste       | polyethylene_(pe)                  | no                                                  |                                                                                                             |            |

|                                                                                                                |                                    |                                   |     |     |      |
|----------------------------------------------------------------------------------------------------------------|------------------------------------|-----------------------------------|-----|-----|------|
| 11                                                                                                             | organic_housewaste                 | polyethylene_tetraphthalate_(pet) | no  |     |      |
| 12                                                                                                             | organic_housewaste                 | polyhydroxy_alkanoate_(pha)       | yes |     | [35] |
| 13                                                                                                             | organic_housewaste                 | polypropylene_(pp)                | no  |     |      |
| 14                                                                                                             | organic_housewaste                 | polystyrene_(ps)                  | no  |     |      |
| 15                                                                                                             | organic_housewaste                 | polyvinylchloride_(pvc)           | no  |     |      |
| 16                                                                                                             | organic_housewaste                 | styrene-butadiene_rubber_(sbr)    | no  |     |      |
| 17                                                                                                             | pig_manure                         | pyrolysis_oil                     | yes |     | [36] |
| 18                                                                                                             | poultry_manure                     | methyl_esters                     | yes |     | [37] |
| 19                                                                                                             | wastewater_sludge                  | pyrolysis_oil                     | yes |     | [38] |
| 20                                                                                                             | vegetable_waste_(general)          | levulinic_acid                    | yes |     | [39] |
| Type of validation: feedstocks with lowest number of co-occurring applications (number of application ∈ [1;3]) |                                    |                                   |     | 66% |      |
| 1                                                                                                              | coconut_extraction_meal            | polyhydroxy_alkanoate_(pha)       | yes |     | [40] |
| 2                                                                                                              | pulp_and_paper_industry_wastewater | styrene-butadiene_rubber_(sbr)    | no  |     |      |
| 3                                                                                                              | brewers_grains                     | compost                           | yes |     | [41] |
| 4                                                                                                              | feeding_beet_leaves                | compost                           | yes |     | [42] |
| 5                                                                                                              | brewers_yeast                      | bioethanol                        | yes |     | [43] |
| 6                                                                                                              | sunflower_peelings                 | furfural                          | yes |     | [44] |
| 7                                                                                                              | meadow_hay                         | acid acetic                       | no  |     |      |
| 8                                                                                                              | animal_bloodmeal                   | compost                           | no  |     |      |
| 9                                                                                                              | natural_grass                      | animal feed                       | yes |     | [45] |
| 10                                                                                                             | roadside_grass                     | animal feed                       | no  |     |      |
| 11                                                                                                             | oilseed_processing_wastewater      | comeric acid                      | no  |     |      |
| 12                                                                                                             | rumen_content                      | lactate                           | no  |     |      |
| 13                                                                                                             | rumen_content                      | methionine                        | no  |     |      |
| 14                                                                                                             | sunflower_extraction_meal          | pyrolysis_oil                     | yes |     | [46] |
| 15                                                                                                             | sunflower_extraction_meal          | soil_improver                     | yes |     | [47] |
| 16                                                                                                             | brewery_industry_wastewaters       | biodiesel                         | yes |     | [48] |
| 17                                                                                                             | brewery_industry_wastewaters       | ethanol / bioethanol              | no  |     |      |
| 18                                                                                                             | rye_straw                          | compost                           | yes |     | [49] |
| 19                                                                                                             | rye_straw                          | levulinic_acid                    | yes |     | [50] |
| 20                                                                                                             | rye_straw                          | substituted_lignins               | yes |     | [51] |
| 21                                                                                                             | cotton_seed_extraction_meal        | biodiesel                         | yes |     | [52] |
| 22                                                                                                             | cotton_seed_extraction_meal        | lactic_acid                       | yes |     | [53] |
| 23                                                                                                             | cotton_seed_extraction_meal        | pyrolysis_oil                     | yes |     | [54] |
| 24                                                                                                             | dairy_industry_wastes_(general)    | lactic_acid                       | yes |     | [55] |
| 25                                                                                                             | dairy_industry_wastes_(general)    | pharmaceutical                    | yes |     | [55] |
| 26                                                                                                             | dairy_industry_wastes_(general)    | polylactic_acid_(pla)             | yes |     | [55] |
| 27                                                                                                             | olive_pulp                         | compost                           | yes |     | [56] |
| 28                                                                                                             | olive_pulp                         | green_solvents                    | no  |     |      |
| 29                                                                                                             | olive_pulp                         | soil_improver                     | yes |     | [57] |
| 30                                                                                                             | cut_flower_wastes                  | ethanol / bioethanol              | yes |     | [58] |
| 31                                                                                                             | cut_flower_wastes                  | biodiesel                         | yes |     | [58] |
| 32                                                                                                             | cut_flower_wastes                  | compost                           | yes |     | [59] |
| 33                                                                                                             | slaughterhouse_wastewater          | biodiesel                         | no  |     |      |
| 34                                                                                                             | slaughterhouse_wastewater          | glycerol                          | no  |     |      |
| 35                                                                                                             | slaughterhouse_wastewater          | polystyrene_(ps)                  | no  |     |      |
| 36                                                                                                             | meat_waste                         | animal_feed                       | yes |     | [60] |
| 37                                                                                                             | meat_waste                         | biohydrogen                       | yes |     | [61] |
| 38                                                                                                             | meat_waste                         | compost                           | yes |     | [62] |
| 39                                                                                                             | ryegrass_straw                     | acetic_acid                       | no  |     |      |
| 40                                                                                                             | ryegrass_straw                     | animal_feed                       | yes |     | [63] |
| 41                                                                                                             | ryegrass_straw                     | citric_acid                       | no  |     |      |
| Total                                                                                                          |                                    |                                   |     | 65% |      |

## References

- Awasthi, M.K.; Pandey, A.K.; Bundela, P.S.; Khan, J. Co-composting of organic fraction of municipal solid waste mixed with different bulking waste: Characterization of physicochemical parameters and microbial enzymatic dynamic. *Bioresour. Technol.* **2015**, *182*, 200–207, doi:10.1016/j.biortech.2015.01.104.
- Vakalis, S.; Sotiropoulos, A.; Moustakas, K.; Malamis, D.; Vekkos, K.; Baratieri, M. Thermochemical valorization and characterization of household biowaste. *J. Environ. Manage.* **2017**, *203*, 648–654, doi:10.1016/j.jenvman.2016.04.017.

3. Katiyar, R.; Gurjar, B.R.; Bharti, R.K.; Kumar, A.; Biswas, S.; Pruthi, V. Heterotrophic cultivation of microalgae in photobioreactor using low cost crude glycerol for enhanced biodiesel production. *Renew. Energy* **2017**, *113*, 1359–1365, doi:10.1016/j.renene.2017.06.100.
4. Kwon, S.H.; Lee, D.H. Evaluation of Korean food waste composting with fed-batch operations I: Using water extractable total organic carbon contents (TOCw). *Process Biochem.* **2004**, *39*, 1183–1194, doi:10.1016/S0032-9592(03)00233-4.
5. Zheng, L.; Zhao, H.; Fu, J.; Lu, X.; Hou, Z. Direct production of ethanol from glycerol over Ni-substituted stichtite derived catalysts. *Appl. Clay Sci.* **2018**, *153*, 54–60, doi:10.1016/j.clay.2017.12.005.
6. Carvalho, L.; Lundgren, J.; Wetterlund, E.; Wolf, J.; Furusjö, E. Methanol production via black liquor co-gasification with expanded raw material base – Techno-economic assessment. *Appl. Energy* **2018**, *225*, 570–584, doi:10.1016/j.apenergy.2018.04.052.
7. Yu, H.; Ren, J.; Liu, L.; Zheng, Z.; Zhu, J.; Yong, Q.; Ouyang, J. A new magnesium bisulfite pretreatment (MBSP) development for bio-ethanol production from corn stover. *Bioresour. Technol.* **2016**, *199*, 188–193, doi:10.1016/j.biortech.2015.08.090.
8. Tiquia, S.M.; Tam, N.F.Y. Fate of nitrogen during composting of chicken litter. *Environ. Pollut.* **2000**, *110*, 535–541, doi:10.1016/S0269-7491(99)00319-X.
9. Tiquia, S.M.; Tam, N.F.Y. Co-composting of spent pig litter and sludge with forced-aeration. *Bioresour. Technol.* **2000**, *72*, 1–7, doi:10.1016/S0960-8524(99)90092-5.
10. Baladincz, P.; Hancsó, J. Fuel from waste animal fats. *Chem. Eng. J.* **2015**, *282*, 152–160, doi:10.1016/j.cej.2015.04.003.
11. Cáceres, R.; Flotats, X.; Marfà, O. Changes in the chemical and physicochemical properties of the solid fraction of cattle slurry during composting using different aeration strategies. *Waste Manag.* **2006**, *26*, 1081–1091, doi:10.1016/j.wasman.2005.06.013.
12. Cheng, J.; Ding, L.; Lin, R.; Yue, L.; Liu, J.; Zhou, J.; Cen, K. Fermentative biohydrogen and biomethane co-production from mixture of food waste and sewage sludge: Effects of physiochemical properties and mix ratios on fermentation performance. *Appl. Energy* **2016**, *184*, 1–8, doi:10.1016/j.apenergy.2016.10.003.
13. Manowattana, A.; Techapun, C.; Watanabe, M.; Chaiyas, T. Bioconversion of biodiesel-derived crude glycerol into lipids and carotenoids by an oleaginous red yeast *Sporidiobolus pararoseus* KM281507 in an airlift bioreactor. *J. Biosci. Bioeng.* **2018**, *125*, 59–66, doi:10.1016/j.jbiosc.2017.07.014.
14. Nguyen, T.L.T.; Hermansen, J.E. System expansion for handling co-products in LCA of sugar cane bio-energy systems: GHG consequences of using molasses for ethanol production. *Appl. Energy* **2012**, *89*, 254–261, doi:10.1016/j.apenergy.2011.07.023.
15. Rajkhowa, T.; Marin, G.B.; Thybaut, J.W. A comprehensive kinetic model for Cu catalyzed liquid phase glycerol hydrogenolysis. *Appl. Catal. B Environ.* **2017**, *205*, 469–480, doi:10.1016/j.apcatb.2016.12.042.
16. Shamba, T.; Kennedy, J.F. Acid and enzymic hydrolysis of chaotropically pretreated millet stalk, acha and rice straws and conversion of the products to ethanol. *Enzyme Microb. Technol.* **1985**, *7*, 115–120, doi:10.1016/0141-0229(85)90140-1.
17. Tong, H.; Shen, Y.; Zhang, J.; Wang, C.H.; Ge, T.S.; Tong, Y.W. A comparative life cycle assessment on four waste-to-energy scenarios for food waste generated in eateries. *Appl. Energy* **2018**, *225*, 1143–1157, doi:10.1016/j.apenergy.2018.05.062.
18. Mahmoodi, P.; Karimi, K.; Taherzadeh, M.J. Hydrothermal processing as pretreatment for efficient production of ethanol and biogas from municipal solid waste. *Bioresour. Technol.* **2018**, *261*, 166–175, doi:10.1016/j.biortech.2018.03.115.
19. Meng, L.; Li, W.; Zhang, S.; Wu, C.; Lv, L. Feasibility of co-composting of sewage sludge, spent mushroom substrate and wheat straw. *Bioresour. Technol.* **2017**, *226*, 39–45, doi:10.1016/j.biortech.2016.11.054.
20. Bhutto, A.W.; Harijan, K.; Qureshi, K.; Bazmi, A.A.; Bahadori, A. Perspectives for the production of ethanol from lignocellulosic feedstock - A case study. *J. Clean. Prod.* **2015**, *95*, 184–193, doi:10.1016/j.jclepro.2015.02.091.
21. Kitamura, R.; Ishii, K.; Maeda, I.; Kozaki, T.; Iwabuchi, K.; Saito, T. Evaluation of bacterial communities by bacteriome analysis targeting 16S rRNA genes and quantitative analysis of ammonia monooxygenase gene in different types of compost. *J. Biosci. Bioeng.* **2016**, *121*, 57–65, doi:10.1016/j.jbiosc.2015.05.005.
22. García, R.; González-Vázquez, M.P.; Pevida, C.; Rubiera, F. Pelletization properties of raw and torrefied pine sawdust: Effect of co-pelletization, temperature, moisture content and glycerol addition. *Fuel* **2018**, *215*, 290–297, doi:10.1016/j.fuel.2017.11.027.
23. Kallis, K.X.; Pellegrini Susini, G.A.; Oakey, J.E. A comparison between Miscanthus and bioethanol waste pellets and their performance in a downdraft gasifier. *Appl. Energy* **2013**, *101*, 333–340, doi:10.1016/j.apenergy.2012.01.037.
24. Han, J. A bio-based 'green' process for catalytic adipic acid production from lignocellulosic biomass using cellulose and hemicellulose derived  $\gamma$ -valerolactone. *Energy Convers. Manag.* **2016**, *129*, 75–80, doi:10.1016/j.enconman.2016.10.019.
25. Vavouraki, A.I.; Angelis, E.M.; Kornaros, M. Optimization of thermo-chemical hydrolysis of kitchen wastes. *Waste Manag.* **2013**, *33*, 740–745, doi:10.1016/j.wasman.2012.07.012.
26. Lonappan, L.; Rouissi, T.; Das, R.K.; Brar, S.K.; Ramirez, A.A.; Verma, M.; Surampalli, R.Y.; Valero, J.R. Adsorption of methylene blue on biochar microparticles derived from different waste materials. *Waste Manag.* **2016**, *49*, 537–544, doi:10.1016/j.wasman.2016.01.015.
27. Abd-Alla, M.H.; Zohri, A.N.A.; El-Enany, A.W.E.; Ali, S.M. Conversion of food processing wastes to biofuel using clostridia. *Anaerobe* **2017**, *48*, 135–143, doi:10.1016/j.anaerobe.2017.08.011.
28. Yao, R. sheng; Zhang, P.; Wang, H.; Deng, S. song; Zhu, H. xia One-step fermentation of pretreated rice straw producing microbial oil by a novel strain of *Mortierella elongata* PFY. *Bioresour. Technol.* **2012**, *124*, 512–515, doi:10.1016/j.biortech.2012.08.142.
29. Ferraro, V.; Anton, M.; Santé-Lhoutellier, V. The “sisters”  $\alpha$ -helices of collagen, elastin and keratin recovered from animal by-products: Functionality, bioactivity and trends of application. *Trends Food Sci. Technol.* **2016**, *51*, 65–75.
30. Guerrero, A.B.; Muñoz, E. Life cycle assessment of second generation ethanol derived from banana agricultural waste: Environmental impacts and energy balance. *J. Clean. Prod.* **2018**, *174*, 710–717, doi:10.1016/j.jclepro.2017.10.298.

31. Theegala, C.S.; Midgett, J.S. Hydrothermal liquefaction of separated dairy manure for production of bio-oils with simultaneous waste treatment. *Bioresour. Technol.* **2012**, *107*, 456–463, doi:10.1016/j.biortech.2011.12.061.
32. Gwak, Y.R.; Kim, Y. Bin; Gwak, I.S.; Lee, S.H. Economic evaluation of synthetic ethanol production by using domestic biowastes and coal mixture. *Fuel* **2018**, *213*, 115–122, doi:10.1016/j.fuel.2017.10.101.
33. Liu, C.M.; Wu, S.Y. From biomass waste to biofuels and biomaterial building blocks. *Renew. Energy* **2016**, *96*, 1056–1062, doi:10.1016/j.renene.2015.12.059.
34. Yang, S.; Li, Q.; Gao, Y.; Zheng, L.; Liu, Z. Biodiesel production from swine manure via housefly larvae (*Musca domestica* L.). *Renew. Energy* **2014**, *66*, 222–227, doi:10.1016/j.renene.2013.11.076.
35. Korkakaki, E.; Mulders, M.; Veeken, A.; Rozendal, R.; van Loosdrecht, M.C.M.; Kleerebezem, R. PHA production from the organic fraction of municipal solid waste (OFMSW): Overcoming the inhibitory matrix. *Water Res.* **2016**, *96*, 74–83, doi:10.1016/j.watres.2016.03.033.
36. Lu, J.; Watson, J.; Zeng, J.; Li, H.; Zhu, Z.; Wang, M.; Zhang, Y.; Liu, Z. Biocrude production and heavy metal migration during hydrothermal liquefaction of swine manure. *Process Saf. Environ. Prot.* **2018**, *115*, 108–115, doi:10.1016/j.psep.2017.11.001.
37. Li, Q.; Zheng, L.; Cai, H.; Garza, E.; Yu, Z.; Zhou, S. From organic waste to biodiesel: Black soldier fly, *Hermetia illucens*, makes it feasible. *Fuel* **2011**, *90*, 1545–1548, doi:10.1016/j.fuel.2010.11.016.
38. Skaggs, R.L.; Coleman, A.M.; Seiple, T.E.; Milbrandt, A.R. Waste-to-Energy biofuel production potential for selected feedstocks in the conterminous United States. *Renew. Sustain. Energy Rev.* **2018**, *82*, 2640–2651.
39. Chen, S.S.; Yu, I.K.M.; Tsang, D.C.W.; Yip, A.C.K.; Khan, E.; Wang, L.; Ok, Y.S.; Poon, C.S. Valorization of cellulosic food waste into levulinic acid catalyzed by heterogeneous Brønsted acids: Temperature and solvent effects. *Chem. Eng. J.* **2017**, *327*, 328–335, doi:10.1016/j.cej.2017.06.108.
40. Ramya, R.; Devi, S.; Manikandan, A.; Kannan, V.R. Standardization of biopolymer production from seaweed associative bacteria. *Int. J. Biol. Macromol.* **2017**, *102*, 550–564, doi:10.1016/j.ijbiomac.2017.04.032.
41. He, Y.; Gu, F.; Xu, C.; Wang, Y. Assessing of the influence of organic and inorganic amendments on the physical-chemical properties of a red soil (Ultisol) quality. *Catena* **2019**, *183*, 104231, doi:10.1016/j.catena.2019.104231.
42. Rihani, M.; Malamis, D.; Bihaoui, B.; Etahiri, S.; Loizidou, M.; Assobhei, O. In-vessel treatment of urban primary sludge by aerobic composting. *Bioresour. Technol.* **2010**, *101*, 5988–5995, doi:10.1016/j.biortech.2010.03.007.
43. Ruanglek, V.; Maneewatthana, D.; Tripetchkul, S. Evaluation of Thai agro-industrial wastes for bio-ethanol production by *Zymomonas mobilis*. *Process Biochem.* **2006**, *41*, 1432–1437, doi:10.1016/j.procbio.2006.01.010.
44. Casoni, A.I.; Hoch, P.M.; Volpe, M.A.; Gutierrez, V.S. Catalytic conversion of furfural from pyrolysis of sunflower seed hulls for producing bio-based furfuryl alcohol. *J. Clean. Prod.* **2018**, *178*, 237–246, doi:10.1016/j.jclepro.2018.01.031.
45. Rawat, L.S.; Maikhuri, R.K.; Dhyani, D.; Bahuguna, Y.M.; Pharswan, D.S. Ecological restoration of village common degraded land through participatory approach for biodiversity conservation and socio-economic development in Indian Himalayan Region. *Acta Ecol. Sin.* **2017**, *37*, 240–252, doi:10.1016/j.chnaes.2017.03.003.
46. Pütün, A.E.; Özcan, A.; Gerçel, H.F.; Pütün, E. Production of biocrudes from biomass in a fixed-bed tubular reactor: Product yields and compositions. *Fuel* **2001**, *80*, 1371–1378, doi:10.1016/S0016-2361(01)00021-7.
47. Zabaniotou, A.; Kamaterou, P.; Kachrimanidou, V.; Vlysidis, A.; Koutinas, A. Taking a reflexive TRL3-4 approach to sustainable use of sunflower meal for the transition from a mono-process pathway to a cascade biorefinery in the context of Circular Bioeconomy. *J. Clean. Prod.* **2018**, *172*, 4119–4129, doi:10.1016/j.jclepro.2017.01.151.
48. Mata, T.M.; Mendes, A.M.; Caetano, N.S.; Martins, A.A. Sustainability and economic evaluation of microalgae grown in brewery wastewater. *Bioresour. Technol.* **2014**, *168*, 151–158, doi:10.1016/j.biortech.2014.04.091.
49. Levi-Minzi, R.; Riffaldi, R.; Saviozzi, A. Carbon mineralization in soil amended with different organic materials. *Agric. Ecosyst. Environ.* **1990**, *31*, 325–335, doi:10.1016/0167-8809(90)90231-2.
50. Filoklis, D.; Pileidis; Maham, T.; Sam, C.; Maria-Magdalena, T. Esterification of levulinic acid into ethyl levulinate catalysed by sulfonated hydrothermal carbons - ScienceDirect. *Chinese J. Catal.* **2014**, *35*, 929–936, doi:10.1016/S1872-2067(14)60125-X.
51. Ingram, T.; Wörmeyer, K.; Lima, J.C.I.; Bockemühl, V.; Antranikian, G.; Brunner, G.; Smirnova, I. Comparison of different pretreatment methods for lignocellulosic materials. Part I: Conversion of rye straw to valuable products. *Bioresour. Technol.* **2011**, *102*, 5221–5228, doi:10.1016/j.biortech.2011.02.005.
52. Panagiotopoulos, I.A.; Pasias, S.; Bakker, R.R.; de Vrije, T.; Papayannakos, N.; Claassen, P.A.M.; Koukios, E.G. Biodiesel and biohydrogen production from cotton-seed cake in a biorefinery concept. *Bioresour. Technol.* **2013**, *136*, 78–86, doi:10.1016/j.biortech.2013.02.061.
53. Grewal, J.; Khare, S.K. One-pot bioprocess for lactic acid production from lignocellulosic agro-wastes by using ionic liquid stable *Lactobacillus brevis*. *Bioresour. Technol.* **2018**, *251*, 268–273, doi:10.1016/j.biortech.2017.12.056.
54. Pütün, E.; Uzun, B.B.; Pütün, A.E. Production of bio-fuels from cottonseed cake by catalytic pyrolysis under steam atmosphere. *Biomass and Bioenergy* **2006**, *30*, 592–598, doi:10.1016/j.biombioe.2005.12.004.
55. Bernardo, M.P.; Coelho, L.F.; Sass, D.C.; Contiero, J. L-(+)-Lactic acid production by *Lactobacillus rhamnosus* B103 from dairy industry waste. *Brazilian J. Microbiol.* **2016**, *47*, 640–646, doi:10.1016/j.bjm.2015.12.001.
56. Galvez-Sola, L.; Moral, R.; Perez-Murcia, M.D.; Perez-Espinosa, A.; Bustamante, M.A.; Martinez-Sabater, E.; Paredes, C. The potential of near infrared reflectance spectroscopy (NIRS) for the estimation of agroindustrial compost quality. *Sci. Total Environ.* **2010**, *408*, 1414–1421, doi:10.1016/j.scitotenv.2009.11.043.

57. Natri, A.; Ramieri, N.A.; Abdayem, R.; Piccaglia, R.; Marzadori, C.; Ciavatta, C. Olive pulp and its effluents suitability for soil amendment. *J. Hazard. Mater.* **2006**, *138*, 211–217, doi:10.1016/j.jhazmat.2006.05.108.
58. Velázquez-Arredondo, H.I.; Ruiz-Colorado, A.A.; De Oliveira, S. Ethanol production process from banana fruit and its lignocellulosic residues: Energy analysis. *Energy* **2010**, *35*, 3081–3087, doi:10.1016/j.energy.2010.03.052.
59. Sharma, D.; Yadav, K.D.; Kumar, S. Biotransformation of flower waste composting: Optimization of waste combinations using response surface methodology. *Bioresour. Technol.* **2018**, *270*, 198–207, doi:10.1016/j.biortech.2018.09.036.
60. García, A.J.; Esteban, M.B.; Márquez, M.C.; Ramos, P. Biodegradable municipal solid waste: Characterization and potential use as animal feedstuffs. *Waste Manag.* **2005**, *25*, 780–787, doi:10.1016/j.wasman.2005.01.006.
61. Boni, M.R.; Sbaiffoni, S.; Tuccinardi, L. The influence of slaughterhouse waste on fermentative H<sub>2</sub> production from food waste: Preliminary results. *Waste Manag.* **2013**, *33*, 1362–1371, doi:10.1016/j.wasman.2013.02.024.
62. Storino, F.; Arizmendiarieta, J.S.; Irigoyen, I.; Muro, J.; Aparicio-Tejo, P.M. Meat waste as feedstock for home composting: Effects on the process and quality of compost. *Waste Manag.* **2016**, *56*, 53–62, doi:10.1016/j.wasman.2016.07.004.
63. Di Francia, A.; Masucci, F.; De Rosa, G.; Varricchio, M.L.; Proto, V. Effects of *Aspergillus oryzae* extract and a *Saccharomyces cerevisiae* fermentation product on intake, body weight gain and digestibility in buffalo calves. *Anim. Feed Sci. Technol.* **2008**, doi:10.1016/j.anifeedsci.2007.02.010.
