# Supplementary material
Source: MDPI journal article supplement (https://www.mdpi.com/1996-1073/13/11/2747)
Supplement: s1 [file s1 › z.Appendix E - List of literature with the co-occurences.xlsx]

## Sheet: Literature_with_Feedstock_Appli
	eid	@_fa	dc:identifier	prism:url	dc:title	dc:creator	dc:description	prism:publicationName	prism:isbn	prism:issn	prism:volume	prism:issueIdentifier	prism:coverDate	prism:coverDisplayDate	prism:startingPage	prism:endingPage	prism:doi	openaccess	openaccessArticle	openArchiveArticle	openaccessUserLicense	prism:aggregationType	prism:copyright	pii	scopus-id	scopus-eid	prism:teaser	pubmed-id	prism:issueName	pubType	authkeywords	prism:edition	term
1	1-s2.0-B9780124076730000047	TRUE	DOI:10.1016/B978-0-12-407673-0.00004-7	https://api.elsevier.com/content/article/pii/B9780124076730000047	Chapter Four Carbon-Rich Wastes as Feedstocks for Biodegradable Polymer (Polyhydroxyalkanoate) Production Using Bacteria	Jasmina, Nikodinovic-Runic	Abstract Research into the production of biodegradable polymers has been driven by vision for the most part from changes in policy, in Europe and America. These policies have their origins in the Brundtland Report of 1987, which provides a platform for a more sustainable society. Biodegradable polymers are part of the emerging portfolio of renewable raw materials seeking to deliver environmental,…	Advances in Applied Microbiology	9780124076730	652164	84	NA	2013-01-01	2013	139	200	10.1016/B978-0-12-407673-0.00004-7	0	FALSE	FALSE	NA	Book Series	Copyright Ã‚Â© 2013 Elsevier Inc. All rights reserved.	B978-0-12-407673-0.00004-7	84878858141	2-s2.0-84878858141	Research into the production of biodegradable polymers has been driven by vision for the most part from changes in policy, in Europe and America. These policies have their origins in the Brundtland...	23763760	NA	NA	Carbon-rich residuals | Carbon-rich waste | Mixed cultures | Polyhydroxyalkanoates (PHAs) | Polymer properties | Productivity | Pure cultures	NA	polyhydroxy_alkanoate_(pha)
2	1-s2.0-B9780124076730000047	TRUE	DOI:10.1016/B978-0-12-407673-0.00004-7	https://api.elsevier.com/content/article/pii/B9780124076730000047	Chapter Four Carbon-Rich Wastes as Feedstocks for Biodegradable Polymer (Polyhydroxyalkanoate) Production Using Bacteria	Jasmina, Nikodinovic-Runic	Abstract Research into the production of biodegradable polymers has been driven by vision for the most part from changes in policy, in Europe and America. These policies have their origins in the Brundtland Report of 1987, which provides a platform for a more sustainable society. Biodegradable polymers are part of the emerging portfolio of renewable raw materials seeking to deliver environmental,…	Advances in Applied Microbiology	9780124076730	652164	84	NA	2013-01-01	2013	139	200	10.1016/B978-0-12-407673-0.00004-7	0	FALSE	FALSE	NA	Book Series	Copyright Ã‚Â© 2013 Elsevier Inc. All rights reserved.	B978-0-12-407673-0.00004-7	84878858141	2-s2.0-84878858141	Research into the production of biodegradable polymers has been driven by vision for the most part from changes in policy, in Europe and America. These policies have their origins in the Brundtland...	23763760	NA	NA	Carbon-rich residuals | Carbon-rich waste | Mixed cultures | Polyhydroxyalkanoates (PHAs) | Polymer properties | Productivity | Pure cultures	NA	polyesters
3	1-s2.0-B9780124076730000047	TRUE	DOI:10.1016/B978-0-12-407673-0.00004-7	https://api.elsevier.com/content/article/pii/B9780124076730000047	Chapter Four Carbon-Rich Wastes as Feedstocks for Biodegradable Polymer (Polyhydroxyalkanoate) Production Using Bacteria	Jasmina, Nikodinovic-Runic	Abstract Research into the production of biodegradable polymers has been driven by vision for the most part from changes in policy, in Europe and America. These policies have their origins in the Brundtland Report of 1987, which provides a platform for a more sustainable society. Biodegradable polymers are part of the emerging portfolio of renewable raw materials seeking to deliver environmental,…	Advances in Applied Microbiology	9780124076730	652164	84	NA	2013-01-01	2013	139	200	10.1016/B978-0-12-407673-0.00004-7	0	FALSE	FALSE	NA	Book Series	Copyright Ã‚Â© 2013 Elsevier Inc. All rights reserved.	B978-0-12-407673-0.00004-7	84878858141	2-s2.0-84878858141	Research into the production of biodegradable polymers has been driven by vision for the most part from changes in policy, in Europe and America. These policies have their origins in the Brundtland...	23763760	NA	NA	Carbon-rich residuals | Carbon-rich waste | Mixed cultures | Polyhydroxyalkanoates (PHAs) | Polymer properties | Productivity | Pure cultures	NA	glycerol
4	1-s2.0-B9780444537287000100	TRUE	DOI:10.1016/B978-0-444-53728-7.00010-0	https://api.elsevier.com/content/article/pii/B9780444537287000100	Chapter 10 Membrane Extraction for Biofuel Production	David L., Grzenia	Abstract Dispersion-free membrane-based solvent extraction has been shown to overcome many of the disadvantages associated with dispersion-based contacting devices used for conventional solvent extraction. Here, we have explored the use of membrane-based solvent extraction for the production of biofuels. Given the nonvolatile nature of most biomass components, it is likely that solvent extraction…	Membrane Science and Technology	9780444537287	9275193	14	NA	2011-01-01	2011	213	233	10.1016/B978-0-444-53728-7.00010-0	0	FALSE	FALSE	NA	Book Series	Copyright Ã‚Â© 2011 Elsevier B.V. All rights reserved.	B978-0-444-53728-7.00010-0	79955603810	2-s2.0-79955603810	Dispersion-free membrane-based solvent extraction has been shown to overcome many of the disadvantages associated with dispersion-based contacting devices used for conventional solvent extraction. Here,...	NA	Inorganic Polymeric and Composite Membranes	NA	Acetic acid | Biodiesel | Bioethanol | Biofuel | Dispersion-free extraction | Glycerol | Hollow fiber | Hydrolysate | Hydroxymethylfurfural | Lignocellulosic biomass | Mass transfer coefficient | Membrane contactor	NA	acetic_acid
5	1-s2.0-B9780444537287000100	TRUE	DOI:10.1016/B978-0-444-53728-7.00010-0	https://api.elsevier.com/content/article/pii/B9780444537287000100	Chapter 10 Membrane Extraction for Biofuel Production	David L., Grzenia	Abstract Dispersion-free membrane-based solvent extraction has been shown to overcome many of the disadvantages associated with dispersion-based contacting devices used for conventional solvent extraction. Here, we have explored the use of membrane-based solvent extraction for the production of biofuels. Given the nonvolatile nature of most biomass components, it is likely that solvent extraction…	Membrane Science and Technology	9780444537287	9275193	14	NA	2011-01-01	2011	213	233	10.1016/B978-0-444-53728-7.00010-0	0	FALSE	FALSE	NA	Book Series	Copyright Ã‚Â© 2011 Elsevier B.V. All rights reserved.	B978-0-444-53728-7.00010-0	79955603810	2-s2.0-79955603810	Dispersion-free membrane-based solvent extraction has been shown to overcome many of the disadvantages associated with dispersion-based contacting devices used for conventional solvent extraction. Here,...	NA	Inorganic Polymeric and Composite Membranes	NA	Acetic acid | Biodiesel | Bioethanol | Biofuel | Dispersion-free extraction | Glycerol | Hollow fiber | Hydrolysate | Hydroxymethylfurfural | Lignocellulosic biomass | Mass transfer coefficient | Membrane contactor	NA	biodiesel
6	1-s2.0-B9780444537287000100	TRUE	DOI:10.1016/B978-0-444-53728-7.00010-0	https://api.elsevier.com/content/article/pii/B9780444537287000100	Chapter 10 Membrane Extraction for Biofuel Production	David L., Grzenia	Abstract Dispersion-free membrane-based solvent extraction has been shown to overcome many of the disadvantages associated with dispersion-based contacting devices used for conventional solvent extraction. Here, we have explored the use of membrane-based solvent extraction for the production of biofuels. Given the nonvolatile nature of most biomass components, it is likely that solvent extraction…	Membrane Science and Technology	9780444537287	9275193	14	NA	2011-01-01	2011	213	233	10.1016/B978-0-444-53728-7.00010-0	0	FALSE	FALSE	NA	Book Series	Copyright Ã‚Â© 2011 Elsevier B.V. All rights reserved.	B978-0-444-53728-7.00010-0	79955603810	2-s2.0-79955603810	Dispersion-free membrane-based solvent extraction has been shown to overcome many of the disadvantages associated with dispersion-based contacting devices used for conventional solvent extraction. Here,...	NA	Inorganic Polymeric and Composite Membranes	NA	Acetic acid | Biodiesel | Bioethanol | Biofuel | Dispersion-free extraction | Glycerol | Hollow fiber | Hydrolysate | Hydroxymethylfurfural | Lignocellulosic biomass | Mass transfer coefficient | Membrane contactor	NA	malt_coffee_marc
7	1-s2.0-B9780444537287000100	TRUE	DOI:10.1016/B978-0-444-53728-7.00010-0	https://api.elsevier.com/content/article/pii/B9780444537287000100	Chapter 10 Membrane Extraction for Biofuel Production	David L., Grzenia	Abstract Dispersion-free membrane-based solvent extraction has been shown to overcome many of the disadvantages associated with dispersion-based contacting devices used for conventional solvent extraction. Here, we have explored the use of membrane-based solvent extraction for the production of biofuels. Given the nonvolatile nature of most biomass components, it is likely that solvent extraction…	Membrane Science and Technology	9780444537287	9275193	14	NA	2011-01-01	2011	213	233	10.1016/B978-0-444-53728-7.00010-0	0	FALSE	FALSE	NA	Book Series	Copyright Ã‚Â© 2011 Elsevier B.V. All rights reserved.	B978-0-444-53728-7.00010-0	79955603810	2-s2.0-79955603810	Dispersion-free membrane-based solvent extraction has been shown to overcome many of the disadvantages associated with dispersion-based contacting devices used for conventional solvent extraction. Here,...	NA	Inorganic Polymeric and Composite Membranes	NA	Acetic acid | Biodiesel | Bioethanol | Biofuel | Dispersion-free extraction | Glycerol | Hollow fiber | Hydrolysate | Hydroxymethylfurfural | Lignocellulosic biomass | Mass transfer coefficient | Membrane contactor	NA	butanol
8	1-s2.0-B9780444537287000100	TRUE	DOI:10.1016/B978-0-444-53728-7.00010-0	https://api.elsevier.com/content/article/pii/B9780444537287000100	Chapter 10 Membrane Extraction for Biofuel Production	David L., Grzenia	Abstract Dispersion-free membrane-based solvent extraction has been shown to overcome many of the disadvantages associated with dispersion-based contacting devices used for conventional solvent extraction. Here, we have explored the use of membrane-based solvent extraction for the production of biofuels. Given the nonvolatile nature of most biomass components, it is likely that solvent extraction…	Membrane Science and Technology	9780444537287	9275193	14	NA	2011-01-01	2011	213	233	10.1016/B978-0-444-53728-7.00010-0	0	FALSE	FALSE	NA	Book Series	Copyright Ã‚Â© 2011 Elsevier B.V. All rights reserved.	B978-0-444-53728-7.00010-0	79955603810	2-s2.0-79955603810	Dispersion-free membrane-based solvent extraction has been shown to overcome many of the disadvantages associated with dispersion-based contacting devices used for conventional solvent extraction. Here,...	NA	Inorganic Polymeric and Composite Membranes	NA	Acetic acid | Biodiesel | Bioethanol | Biofuel | Dispersion-free extraction | Glycerol | Hollow fiber | Hydrolysate | Hydroxymethylfurfural | Lignocellulosic biomass | Mass transfer coefficient | Membrane contactor	NA	ethanol_/_bioethanol
9	1-s2.0-B9780444537287000100	TRUE	DOI:10.1016/B978-0-444-53728-7.00010-0	https://api.elsevier.com/content/article/pii/B9780444537287000100	Chapter 10 Membrane Extraction for Biofuel Production	David L., Grzenia	Abstract Dispersion-free membrane-based solvent extraction has been shown to overcome many of the disadvantages associated with dispersion-based contacting devices used for conventional solvent extraction. Here, we have explored the use of membrane-based solvent extraction for the production of biofuels. Given the nonvolatile nature of most biomass components, it is likely that solvent extraction…	Membrane Science and Technology	9780444537287	9275193	14	NA	2011-01-01	2011	213	233	10.1016/B978-0-444-53728-7.00010-0	0	FALSE	FALSE	NA	Book Series	Copyright Ã‚Â© 2011 Elsevier B.V. All rights reserved.	B978-0-444-53728-7.00010-0	79955603810	2-s2.0-79955603810	Dispersion-free membrane-based solvent extraction has been shown to overcome many of the disadvantages associated with dispersion-based contacting devices used for conventional solvent extraction. Here,...	NA	Inorganic Polymeric and Composite Membranes	NA	Acetic acid | Biodiesel | Bioethanol | Biofuel | Dispersion-free extraction | Glycerol | Hollow fiber | Hydrolysate | Hydroxymethylfurfural | Lignocellulosic biomass | Mass transfer coefficient | Membrane contactor	NA	glycerol
10	1-s2.0-B9780444542984501550	TRUE	DOI:10.1016/B978-0-444-54298-4.50155-0	https://api.elsevier.com/content/article/pii/B9780444542984501550	Co-production of ethanol, hydrogen and biogas using agro-wastes. Conceptual plant design and NPV analysis for mid-size agricultural sectors	Arturo, Sanchez	Abstract A parametric cost analysis is presented for the co-production of ethanol, hydrogen and biogas considering financial and operational conditions of mid-size agricultural sectors. A hypothetical feedstock based on wheat straw is employed whose price is related to its polysaccharides content. Production costs are calculated using the Net Present Value (NPV) technique for a given process flow…	Computer Aided Chemical Engineering	9780444538956	15707946	29	NA	2011-01-01	2011	1884	1888	10.1016/B978-0-444-54298-4.50155-0	0	FALSE	FALSE	NA	Book Series	Copyright Ã‚Â© 2011 Elsevier B.V. All rights reserved.	B978-0-444-54298-4.50155-0	79958776978	2-s2.0-79958776978	A parametric cost analysis is presented for the co-production of ethanol, hydrogen and biogas considering financial and operational conditions of mid-size agricultural sectors. A hypothetical feedstock...	NA	21st European Symposium on Computer Aided Process Engineering	NA	multipurpose plant | biofuels | bio-refinery | conceptual design | NPV	NA	ethanol_/_bioethanol
11	1-s2.0-B9780444542984501550	TRUE	DOI:10.1016/B978-0-444-54298-4.50155-0	https://api.elsevier.com/content/article/pii/B9780444542984501550	Co-production of ethanol, hydrogen and biogas using agro-wastes. Conceptual plant design and NPV analysis for mid-size agricultural sectors	Arturo, Sanchez	Abstract A parametric cost analysis is presented for the co-production of ethanol, hydrogen and biogas considering financial and operational conditions of mid-size agricultural sectors. A hypothetical feedstock based on wheat straw is employed whose price is related to its polysaccharides content. Production costs are calculated using the Net Present Value (NPV) technique for a given process flow…	Computer Aided Chemical Engineering	9780444538956	15707946	29	NA	2011-01-01	2011	1884	1888	10.1016/B978-0-444-54298-4.50155-0	0	FALSE	FALSE	NA	Book Series	Copyright Ã‚Â© 2011 Elsevier B.V. All rights reserved.	B978-0-444-54298-4.50155-0	79958776978	2-s2.0-79958776978	A parametric cost analysis is presented for the co-production of ethanol, hydrogen and biogas considering financial and operational conditions of mid-size agricultural sectors. A hypothetical feedstock...	NA	21st European Symposium on Computer Aided Process Engineering	NA	multipurpose plant | biofuels | bio-refinery | conceptual design | NPV	NA	wheat_straw
12	1-s2.0-B9780444595065500390	TRUE	DOI:10.1016/B978-0-444-59506-5.50039-0	https://api.elsevier.com/content/article/pii/B9780444595065500390	Supply Chain Optimization of Biomass Production Improvement	Mingyen, Yu	Abstract Renewable energy, especially biofuels, is seen as a viable solution to replace the depleting fossil fuels. Moreover, tighter environmental regulations across the world force many countries to develop strategic approaches to target and screen relevant replacement of resources and technologies. Because there are significant variations in types of biomass and conversion methods, determining…	Computer Aided Chemical Engineering	9780444595058	15707946	31	NA	2012-01-01	2012	1040	1044	10.1016/B978-0-444-59506-5.50039-0	0	FALSE	FALSE	NA	Book Series	Copyright Ã‚Â© 2012 Elsevier B.V. All rights reserved.	B978-0-444-59506-5.50039-0	84864526780	2-s2.0-84864526780	Renewable energy, especially biofuels, is seen as a viable solution to replace the depleting fossil fuels. Moreover, tighter environmental regulations across the world force many countries to develop...	NA	11th International Symposium on Process Systems Engineering	NA	Supply chain management | Optimization | Renewable energy	NA	distillers_grains
13	1-s2.0-B9780444595065500390	TRUE	DOI:10.1016/B978-0-444-59506-5.50039-0	https://api.elsevier.com/content/article/pii/B9780444595065500390	Supply Chain Optimization of Biomass Production Improvement	Mingyen, Yu	Abstract Renewable energy, especially biofuels, is seen as a viable solution to replace the depleting fossil fuels. Moreover, tighter environmental regulations across the world force many countries to develop strategic approaches to target and screen relevant replacement of resources and technologies. Because there are significant variations in types of biomass and conversion methods, determining…	Computer Aided Chemical Engineering	9780444595058	15707946	31	NA	2012-01-01	2012	1040	1044	10.1016/B978-0-444-59506-5.50039-0	0	FALSE	FALSE	NA	Book Series	Copyright Ã‚Â© 2012 Elsevier B.V. All rights reserved.	B978-0-444-59506-5.50039-0	84864526780	2-s2.0-84864526780	Renewable energy, especially biofuels, is seen as a viable solution to replace the depleting fossil fuels. Moreover, tighter environmental regulations across the world force many countries to develop...	NA	11th International Symposium on Process Systems Engineering	NA	Supply chain management | Optimization | Renewable energy	NA	maize_stover
14	1-s2.0-B9780444595065500390	TRUE	DOI:10.1016/B978-0-444-59506-5.50039-0	https://api.elsevier.com/content/article/pii/B9780444595065500390	Supply Chain Optimization of Biomass Production Improvement	Mingyen, Yu	Abstract Renewable energy, especially biofuels, is seen as a viable solution to replace the depleting fossil fuels. Moreover, tighter environmental regulations across the world force many countries to develop strategic approaches to target and screen relevant replacement of resources and technologies. Because there are significant variations in types of biomass and conversion methods, determining…	Computer Aided Chemical Engineering	9780444595058	15707946	31	NA	2012-01-01	2012	1040	1044	10.1016/B978-0-444-59506-5.50039-0	0	FALSE	FALSE	NA	Book Series	Copyright Ã‚Â© 2012 Elsevier B.V. All rights reserved.	B978-0-444-59506-5.50039-0	84864526780	2-s2.0-84864526780	Renewable energy, especially biofuels, is seen as a viable solution to replace the depleting fossil fuels. Moreover, tighter environmental regulations across the world force many countries to develop...	NA	11th International Symposium on Process Systems Engineering	NA	Supply chain management | Optimization | Renewable energy	NA	ethanol_/_bioethanol
15	1-s2.0-B9780444634283501119	TRUE	DOI:10.1016/B978-0-444-63428-3.50111-9	https://api.elsevier.com/content/article/pii/B9780444634283501119	Novel plant-wide process design of dichlorohydrin production by glycerol hydrochlorination	San-Jang, Wang	Abstract Dichlorohydrin is an important intermediate for synthesizing epichlorohydrin, a high volume of commodity chemical largely utilized in the production of epoxy resins. It is commonly manufactured from propylene and chlorine as primary raw materials. However, this synthesis process suffers from some drawbacks such as low chlorine atom efficiency and formation of unwanted chlorinated organic…	Computer Aided Chemical Engineering	9780444634283	15707946	38	NA	2016-01-01	2016	637	642	10.1016/B978-0-444-63428-3.50111-9	0	FALSE	FALSE	NA	Book Series	Copyright Ã‚Â© 2016 Elsevier B.V. All rights reserved.	B978-0-444-63428-3.50111-9	NA	NA	Dichlorohydrin is an important intermediate for synthesizing epichlorohydrin, a high volume of commodity chemical largely utilized in the production of epoxy resins. It is commonly manufactured from...	NA	26th European Symposium on Computer Aided Process Engineering	NA	Glycerol | Reactive distillation | Plant-wide process design | Dichlorohydrin | Thermal coupling	NA	epichlorohydrin
16	1-s2.0-B9780444634283501119	TRUE	DOI:10.1016/B978-0-444-63428-3.50111-9	https://api.elsevier.com/content/article/pii/B9780444634283501119	Novel plant-wide process design of dichlorohydrin production by glycerol hydrochlorination	San-Jang, Wang	Abstract Dichlorohydrin is an important intermediate for synthesizing epichlorohydrin, a high volume of commodity chemical largely utilized in the production of epoxy resins. It is commonly manufactured from propylene and chlorine as primary raw materials. However, this synthesis process suffers from some drawbacks such as low chlorine atom efficiency and formation of unwanted chlorinated organic…	Computer Aided Chemical Engineering	9780444634283	15707946	38	NA	2016-01-01	2016	637	642	10.1016/B978-0-444-63428-3.50111-9	0	FALSE	FALSE	NA	Book Series	Copyright Ã‚Â© 2016 Elsevier B.V. All rights reserved.	B978-0-444-63428-3.50111-9	NA	NA	Dichlorohydrin is an important intermediate for synthesizing epichlorohydrin, a high volume of commodity chemical largely utilized in the production of epoxy resins. It is commonly manufactured from...	NA	26th European Symposium on Computer Aided Process Engineering	NA	Glycerol | Reactive distillation | Plant-wide process design | Dichlorohydrin | Thermal coupling	NA	epoxies_(ep)
17	1-s2.0-B9780444634283501119	TRUE	DOI:10.1016/B978-0-444-63428-3.50111-9	https://api.elsevier.com/content/article/pii/B9780444634283501119	Novel plant-wide process design of dichlorohydrin production by glycerol hydrochlorination	San-Jang, Wang	Abstract Dichlorohydrin is an important intermediate for synthesizing epichlorohydrin, a high volume of commodity chemical largely utilized in the production of epoxy resins. It is commonly manufactured from propylene and chlorine as primary raw materials. However, this synthesis process suffers from some drawbacks such as low chlorine atom efficiency and formation of unwanted chlorinated organic…	Computer Aided Chemical Engineering	9780444634283	15707946	38	NA	2016-01-01	2016	637	642	10.1016/B978-0-444-63428-3.50111-9	0	FALSE	FALSE	NA	Book Series	Copyright Ã‚Â© 2016 Elsevier B.V. All rights reserved.	B978-0-444-63428-3.50111-9	NA	NA	Dichlorohydrin is an important intermediate for synthesizing epichlorohydrin, a high volume of commodity chemical largely utilized in the production of epoxy resins. It is commonly manufactured from...	NA	26th European Symposium on Computer Aided Process Engineering	NA	Glycerol | Reactive distillation | Plant-wide process design | Dichlorohydrin | Thermal coupling	NA	glycerol
18	1-s2.0-B9780444634283501119	TRUE	DOI:10.1016/B978-0-444-63428-3.50111-9	https://api.elsevier.com/content/article/pii/B9780444634283501119	Novel plant-wide process design of dichlorohydrin production by glycerol hydrochlorination	San-Jang, Wang	Abstract Dichlorohydrin is an important intermediate for synthesizing epichlorohydrin, a high volume of commodity chemical largely utilized in the production of epoxy resins. It is commonly manufactured from propylene and chlorine as primary raw materials. However, this synthesis process suffers from some drawbacks such as low chlorine atom efficiency and formation of unwanted chlorinated organic…	Computer Aided Chemical Engineering	9780444634283	15707946	38	NA	2016-01-01	2016	637	642	10.1016/B978-0-444-63428-3.50111-9	0	FALSE	FALSE	NA	Book Series	Copyright Ã‚Â© 2016 Elsevier B.V. All rights reserved.	B978-0-444-63428-3.50111-9	NA	NA	Dichlorohydrin is an important intermediate for synthesizing epichlorohydrin, a high volume of commodity chemical largely utilized in the production of epoxy resins. It is commonly manufactured from...	NA	26th European Symposium on Computer Aided Process Engineering	NA	Glycerol | Reactive distillation | Plant-wide process design | Dichlorohydrin | Thermal coupling	NA	acetic_acid
19	1-s2.0-B9780444634283503428	TRUE	DOI:10.1016/B978-0-444-63428-3.50342-8	https://api.elsevier.com/content/article/pii/B9780444634283503428	A Comparative Study of Fischer-Tropsch Synthesis for Liquid Transportation Fuels Production from Biomass	Pengcheng, Li	Abstract Biomass is widely recognized as one of the promising renewable sources for the production of liquid fuels (gasoline, diesel, and kerosene) and chemicals. Fischer-Tropsch Synthesis (FTS) coupled with gasification is an efficient pathway for biomass conversion. In this work, biomass conversion processes for liquid transportation fuels production is simulated in ASPEN Plus. Given the same b…	Computer Aided Chemical Engineering	9780444634283	15707946	38	NA	2016-01-01	2016	2025	2030	10.1016/B978-0-444-63428-3.50342-8	0	FALSE	FALSE	NA	Book Series	Copyright Ã‚Â© 2016 Elsevier B.V. All rights reserved.	B978-0-444-63428-3.50342-8	NA	NA	Biomass is widely recognized as one of the promising renewable sources for the production of liquid fuels (gasoline, diesel, and kerosene) and chemicals. Fischer-Tropsch Synthesis (FTS) coupled with...	NA	26th European Symposium on Computer Aided Process Engineering	NA	Biomass conversion process | Fischer-Tropsch synthesis	NA	biogasoline
20	1-s2.0-B9780444634283503428	TRUE	DOI:10.1016/B978-0-444-63428-3.50342-8	https://api.elsevier.com/content/article/pii/B9780444634283503428	A Comparative Study of Fischer-Tropsch Synthesis for Liquid Transportation Fuels Production from Biomass	Pengcheng, Li	Abstract Biomass is widely recognized as one of the promising renewable sources for the production of liquid fuels (gasoline, diesel, and kerosene) and chemicals. Fischer-Tropsch Synthesis (FTS) coupled with gasification is an efficient pathway for biomass conversion. In this work, biomass conversion processes for liquid transportation fuels production is simulated in ASPEN Plus. Given the same b…	Computer Aided Chemical Engineering	9780444634283	15707946	38	NA	2016-01-01	2016	2025	2030	10.1016/B978-0-444-63428-3.50342-8	0	FALSE	FALSE	NA	Book Series	Copyright Ã‚Â© 2016 Elsevier B.V. All rights reserved.	B978-0-444-63428-3.50342-8	NA	NA	Biomass is widely recognized as one of the promising renewable sources for the production of liquid fuels (gasoline, diesel, and kerosene) and chemicals. Fischer-Tropsch Synthesis (FTS) coupled with...	NA	26th European Symposium on Computer Aided Process Engineering	NA	Biomass conversion process | Fischer-Tropsch synthesis	NA	maize_stover
21	1-s2.0-B9780444634283503519	TRUE	DOI:10.1016/B978-0-444-63428-3.50351-9	https://api.elsevier.com/content/article/pii/B9780444634283503519	Discovering Valorisation Paths in Waste Biorefineries using an Ontology Engineering Approach	Foteini, Barla	Abstract Pectin and D-limonene from citrus peel, hydrogen gas from pulp and paper industrial by-products, peptides from dairy residues, lactic acid and biosurfactant from grape stalks, methane from MSW and biodiesel from waste cooking oil are only few paradigms exhibiting successful valorisation of waste resources. With the shortage of fossil fuels putting pressure to find alternative and sustain…	Computer Aided Chemical Engineering	9780444634283	15707946	38	NA	2016-01-01	2016	2079	2084	10.1016/B978-0-444-63428-3.50351-9	0	FALSE	FALSE	NA	Book Series	Copyright Ã‚Â© 2016 Elsevier B.V. All rights reserved.	B978-0-444-63428-3.50351-9	84994235603	2-s2.0-84994235603	Pectin and D-limonene from citrus peel, hydrogen gas from pulp and paper industrial by-products, peptides from dairy residues, lactic acid and biosurfactant from grape stalks, methane from MSW and biodiesel...	NA	26th European Symposium on Computer Aided Process Engineering	NA	ontology | waste | valorisation | synthesis | biorefinery	NA	lactic_acid
22	1-s2.0-B9780444634283503519	TRUE	DOI:10.1016/B978-0-444-63428-3.50351-9	https://api.elsevier.com/content/article/pii/B9780444634283503519	Discovering Valorisation Paths in Waste Biorefineries using an Ontology Engineering Approach	Foteini, Barla	Abstract Pectin and D-limonene from citrus peel, hydrogen gas from pulp and paper industrial by-products, peptides from dairy residues, lactic acid and biosurfactant from grape stalks, methane from MSW and biodiesel from waste cooking oil are only few paradigms exhibiting successful valorisation of waste resources. With the shortage of fossil fuels putting pressure to find alternative and sustain…	Computer Aided Chemical Engineering	9780444634283	15707946	38	NA	2016-01-01	2016	2079	2084	10.1016/B978-0-444-63428-3.50351-9	0	FALSE	FALSE	NA	Book Series	Copyright Ã‚Â© 2016 Elsevier B.V. All rights reserved.	B978-0-444-63428-3.50351-9	84994235603	2-s2.0-84994235603	Pectin and D-limonene from citrus peel, hydrogen gas from pulp and paper industrial by-products, peptides from dairy residues, lactic acid and biosurfactant from grape stalks, methane from MSW and biodiesel...	NA	26th European Symposium on Computer Aided Process Engineering	NA	ontology | waste | valorisation | synthesis | biorefinery	NA	organic_housewaste
23	1-s2.0-B9780444634283503519	TRUE	DOI:10.1016/B978-0-444-63428-3.50351-9	https://api.elsevier.com/content/article/pii/B9780444634283503519	Discovering Valorisation Paths in Waste Biorefineries using an Ontology Engineering Approach	Foteini, Barla	Abstract Pectin and D-limonene from citrus peel, hydrogen gas from pulp and paper industrial by-products, peptides from dairy residues, lactic acid and biosurfactant from grape stalks, methane from MSW and biodiesel from waste cooking oil are only few paradigms exhibiting successful valorisation of waste resources. With the shortage of fossil fuels putting pressure to find alternative and sustain…	Computer Aided Chemical Engineering	9780444634283	15707946	38	NA	2016-01-01	2016	2079	2084	10.1016/B978-0-444-63428-3.50351-9	0	FALSE	FALSE	NA	Book Series	Copyright Ã‚Â© 2016 Elsevier B.V. All rights reserved.	B978-0-444-63428-3.50351-9	84994235603	2-s2.0-84994235603	Pectin and D-limonene from citrus peel, hydrogen gas from pulp and paper industrial by-products, peptides from dairy residues, lactic acid and biosurfactant from grape stalks, methane from MSW and biodiesel...	NA	26th European Symposium on Computer Aided Process Engineering	NA	ontology | waste | valorisation | synthesis | biorefinery	NA	biodiesel
24	1-s2.0-B9780444634283503519	TRUE	DOI:10.1016/B978-0-444-63428-3.50351-9	https://api.elsevier.com/content/article/pii/B9780444634283503519	Discovering Valorisation Paths in Waste Biorefineries using an Ontology Engineering Approach	Foteini, Barla	Abstract Pectin and D-limonene from citrus peel, hydrogen gas from pulp and paper industrial by-products, peptides from dairy residues, lactic acid and biosurfactant from grape stalks, methane from MSW and biodiesel from waste cooking oil are only few paradigms exhibiting successful valorisation of waste resources. With the shortage of fossil fuels putting pressure to find alternative and sustain…	Computer Aided Chemical Engineering	9780444634283	15707946	38	NA	2016-01-01	2016	2079	2084	10.1016/B978-0-444-63428-3.50351-9	0	FALSE	FALSE	NA	Book Series	Copyright Ã‚Â© 2016 Elsevier B.V. All rights reserved.	B978-0-444-63428-3.50351-9	84994235603	2-s2.0-84994235603	Pectin and D-limonene from citrus peel, hydrogen gas from pulp and paper industrial by-products, peptides from dairy residues, lactic acid and biosurfactant from grape stalks, methane from MSW and biodiesel...	NA	26th European Symposium on Computer Aided Process Engineering	NA	ontology | waste | valorisation | synthesis | biorefinery	NA	citrus_bagasse
25	1-s2.0-B978044463428350374X	TRUE	DOI:10.1016/B978-0-444-63428-3.50374-X	https://api.elsevier.com/content/article/pii/B978044463428350374X	Dynamic Metabolic Modelling of Cupriavidus necator DSM 545 in PHB Production from Glycerol	Chenhao, Sun	Abstract Utilisation of glycerol from the ever-expanding biodiesel industry (Heming, 2005) is deemed as a promising solution for the sustainable manufacturing of value-added chemicals. In one such novel process, glycerol is utilised by bacterial strain Cupriavidus necator DSM 545 to synthesis poly(3-hydroxybutyric acid), a bioplastic with potential to replace its petrochemical counterparts in man…	Computer Aided Chemical Engineering	9780444634283	15707946	38	NA	2016-01-01	2016	2217	2222	10.1016/B978-0-444-63428-3.50374-X	0	FALSE	FALSE	NA	Book Series	Copyright Ã‚Â© 2016 Elsevier B.V. All rights reserved.	B978-0-444-63428-3.50374-X	84994314284	2-s2.0-84994314284	Utilisation of glycerol from the ever-expanding biodiesel industry (Heming, 2005) is deemed as a promising solution for the sustainable manufacturing of value-added chemicals. In one such novel process,...	NA	26th European Symposium on Computer Aided Process Engineering	NA	Cupriavidus necator | PHB | Glycerol | Dynamic Metabolic Modelling | Flux Balance Analysis	NA	glycerol
26	1-s2.0-B978044463433750016X	TRUE	DOI:10.1016/B978-0-444-63433-7.50016-X	https://api.elsevier.com/content/article/pii/B978044463433750016X	Viable Alternatives for Biofuels using Biochemical Pathways	Jonathan P., Raftery	Abstract Little research has been done regarding the effect of biomass feed composition and process pretreatment type on the economic viability of the conversion of biomass to ethanol via biochemical pathways. In this study, a mixed-integer nonlinear program consisting of mass balances and cost correlations is proposed and used to find the optimal feedstock composition and pretreatment method req…	Computer Aided Chemical Engineering	9780444634337	15707946	34	NA	2014-01-01	2014	150	162	10.1016/B978-0-444-63433-7.50016-X	0	FALSE	FALSE	NA	Book Series	Copyright Ã‚Â© 2014 Elsevier B.V. All rights reserved.	B978-0-444-63433-7.50016-X	84904278760	2-s2.0-84904278760	Little research has been done regarding the effect of biomass feed composition and process pretreatment type on the economic viability of the conversion of biomass to ethanol via biochemical pathways....	NA	Proceedings of the 8th International Conference on Foundations of Computer-Aided Process Design	NA	bioethanol | biochemical processing | optimization | biomass to biofuel | mixed-integer nonlinear programming	NA	ethanol_/_bioethanol
27	1-s2.0-B978044463433750016X	TRUE	DOI:10.1016/B978-0-444-63433-7.50016-X	https://api.elsevier.com/content/article/pii/B978044463433750016X	Viable Alternatives for Biofuels using Biochemical Pathways	Jonathan P., Raftery	Abstract Little research has been done regarding the effect of biomass feed composition and process pretreatment type on the economic viability of the conversion of biomass to ethanol via biochemical pathways. In this study, a mixed-integer nonlinear program consisting of mass balances and cost correlations is proposed and used to find the optimal feedstock composition and pretreatment method req…	Computer Aided Chemical Engineering	9780444634337	15707946	34	NA	2014-01-01	2014	150	162	10.1016/B978-0-444-63433-7.50016-X	0	FALSE	FALSE	NA	Book Series	Copyright Ã‚Â© 2014 Elsevier B.V. All rights reserved.	B978-0-444-63433-7.50016-X	84904278760	2-s2.0-84904278760	Little research has been done regarding the effect of biomass feed composition and process pretreatment type on the economic viability of the conversion of biomass to ethanol via biochemical pathways....	NA	Proceedings of the 8th International Conference on Foundations of Computer-Aided Process Design	NA	bioethanol | biochemical processing | optimization | biomass to biofuel | mixed-integer nonlinear programming	NA	maize_stover
28	1-s2.0-B9780444635761500480	TRUE	DOI:10.1016/B978-0-444-63576-1.50048-0	https://api.elsevier.com/content/article/pii/B9780444635761500480	Exploring Opportunities for the Production of Chemicals from Municipal Solid Wastes within the Framework of a Biorefinery	Fabian, Bonk	Abstract Technological advances in catalytic and biological engineering have created opportunities for the production of high value chemicals from biomolecules such as glucose. Yet, production of such chemicals from real, complex biomass requires the integration with biomass pre-treatment. This study exemplifies the use of a computer aided collaborative environment that integrates biomass pre- an…	Computer Aided Chemical Engineering	9780444634290	15707946	37	NA	2015-01-01	2015	2123	2128	10.1016/B978-0-444-63576-1.50048-0	0	FALSE	FALSE	NA	Book Series	Copyright Ã‚Â© 2015 Elsevier B.V. All rights reserved.	B978-0-444-63576-1.50048-0	84940496872	2-s2.0-84940496872	Technological advances in catalytic and biological engineering have created opportunities for the production of high value chemicals from biomolecules such as glucose. Yet, production of such chemicals...	NA	12th International Symposium on Process Systems Engineering and 25th European Symposium on Computer Aided Process Engineering	NA	biorefinery | computer aided collaborative environment | organic fraction of municipal solid waste | enzymatic hydrolysis | dark fermentation	NA	biohydrogen
29	1-s2.0-B9780444635761500480	TRUE	DOI:10.1016/B978-0-444-63576-1.50048-0	https://api.elsevier.com/content/article/pii/B9780444635761500480	Exploring Opportunities for the Production of Chemicals from Municipal Solid Wastes within the Framework of a Biorefinery	Fabian, Bonk	Abstract Technological advances in catalytic and biological engineering have created opportunities for the production of high value chemicals from biomolecules such as glucose. Yet, production of such chemicals from real, complex biomass requires the integration with biomass pre-treatment. This study exemplifies the use of a computer aided collaborative environment that integrates biomass pre- an…	Computer Aided Chemical Engineering	9780444634290	15707946	37	NA	2015-01-01	2015	2123	2128	10.1016/B978-0-444-63576-1.50048-0	0	FALSE	FALSE	NA	Book Series	Copyright Ã‚Â© 2015 Elsevier B.V. All rights reserved.	B978-0-444-63576-1.50048-0	84940496872	2-s2.0-84940496872	Technological advances in catalytic and biological engineering have created opportunities for the production of high value chemicals from biomolecules such as glucose. Yet, production of such chemicals...	NA	12th International Symposium on Process Systems Engineering and 25th European Symposium on Computer Aided Process Engineering	NA	biorefinery | computer aided collaborative environment | organic fraction of municipal solid waste | enzymatic hydrolysis | dark fermentation	NA	organic_housewaste
30	1-s2.0-B9780444635778501510	TRUE	DOI:10.1016/B978-0-444-63577-8.50151-0	https://api.elsevier.com/content/article/pii/B9780444635778501510	Risk Analysis Applied to Bioethanol Dehydration Processes: Azeotropic Distillation versus Extractive Distillation	Adriana, AvilÃƒÂ©s-MartÃƒÂ­nez	Abstract Production of anhydrous ethanol in large scale has been made by extractive distillation using solvents such as ethylene-glycol or glycerol. In this work, azeotropic distillation is studied to dehydrate bioethanol using n-octane as entrainer. We use a procedure to account for risk and safety, in addition to economic evaluations, in the process design. A probabilistic methodology is applie…	Computer Aided Chemical Engineering	9780444634290	15707946	37	NA	2015-01-01	2015	1835	1840	10.1016/B978-0-444-63577-8.50151-0	0	FALSE	FALSE	NA	Book Series	Copyright Ã‚Â© 2015 Elsevier B.V. All rights reserved.	B978-0-444-63577-8.50151-0	84940496335	2-s2.0-84940496335	Production of anhydrous ethanol in large scale has been made by extractive distillation using solvents such as ethylene-glycol or glycerol. In this work, azeotropic distillation is studied to dehydrate...	NA	12th International Symposium on Process Systems Engineering and 25th European Symposium on Computer Aided Process Engineering	NA	Safety | Anhydrous ethanol | Azeotropic distillation | Bio-ethanol	NA	green_solvents
31	1-s2.0-B9780444635778501510	TRUE	DOI:10.1016/B978-0-444-63577-8.50151-0	https://api.elsevier.com/content/article/pii/B9780444635778501510	Risk Analysis Applied to Bioethanol Dehydration Processes: Azeotropic Distillation versus Extractive Distillation	Adriana, AvilÃƒÂ©s-MartÃƒÂ­nez	Abstract Production of anhydrous ethanol in large scale has been made by extractive distillation using solvents such as ethylene-glycol or glycerol. In this work, azeotropic distillation is studied to dehydrate bioethanol using n-octane as entrainer. We use a procedure to account for risk and safety, in addition to economic evaluations, in the process design. A probabilistic methodology is applie…	Computer Aided Chemical Engineering	9780444634290	15707946	37	NA	2015-01-01	2015	1835	1840	10.1016/B978-0-444-63577-8.50151-0	0	FALSE	FALSE	NA	Book Series	Copyright Ã‚Â© 2015 Elsevier B.V. All rights reserved.	B978-0-444-63577-8.50151-0	84940496335	2-s2.0-84940496335	Production of anhydrous ethanol in large scale has been made by extractive distillation using solvents such as ethylene-glycol or glycerol. In this work, azeotropic distillation is studied to dehydrate...	NA	12th International Symposium on Process Systems Engineering and 25th European Symposium on Computer Aided Process Engineering	NA	Safety | Anhydrous ethanol | Azeotropic distillation | Bio-ethanol	NA	glycerol
32	1-s2.0-B9780444635778501510	TRUE	DOI:10.1016/B978-0-444-63577-8.50151-0	https://api.elsevier.com/content/article/pii/B9780444635778501510	Risk Analysis Applied to Bioethanol Dehydration Processes: Azeotropic Distillation versus Extractive Distillation	Adriana, AvilÃƒÂ©s-MartÃƒÂ­nez	Abstract Production of anhydrous ethanol in large scale has been made by extractive distillation using solvents such as ethylene-glycol or glycerol. In this work, azeotropic distillation is studied to dehydrate bioethanol using n-octane as entrainer. We use a procedure to account for risk and safety, in addition to economic evaluations, in the process design. A probabilistic methodology is applie…	Computer Aided Chemical Engineering	9780444634290	15707946	37	NA	2015-01-01	2015	1835	1840	10.1016/B978-0-444-63577-8.50151-0	0	FALSE	FALSE	NA	Book Series	Copyright Ã‚Â© 2015 Elsevier B.V. All rights reserved.	B978-0-444-63577-8.50151-0	84940496335	2-s2.0-84940496335	Production of anhydrous ethanol in large scale has been made by extractive distillation using solvents such as ethylene-glycol or glycerol. In this work, azeotropic distillation is studied to dehydrate...	NA	12th International Symposium on Process Systems Engineering and 25th European Symposium on Computer Aided Process Engineering	NA	Safety | Anhydrous ethanol | Azeotropic distillation | Bio-ethanol	NA	ethylene_glycol
33	1-s2.0-B9780444635778501510	TRUE	DOI:10.1016/B978-0-444-63577-8.50151-0	https://api.elsevier.com/content/article/pii/B9780444635778501510	Risk Analysis Applied to Bioethanol Dehydration Processes: Azeotropic Distillation versus Extractive Distillation	Adriana, AvilÃƒÂ©s-MartÃƒÂ­nez	Abstract Production of anhydrous ethanol in large scale has been made by extractive distillation using solvents such as ethylene-glycol or glycerol. In this work, azeotropic distillation is studied to dehydrate bioethanol using n-octane as entrainer. We use a procedure to account for risk and safety, in addition to economic evaluations, in the process design. A probabilistic methodology is applie…	Computer Aided Chemical Engineering	9780444634290	15707946	37	NA	2015-01-01	2015	1835	1840	10.1016/B978-0-444-63577-8.50151-0	0	FALSE	FALSE	NA	Book Series	Copyright Ã‚Â© 2015 Elsevier B.V. All rights reserved.	B978-0-444-63577-8.50151-0	84940496335	2-s2.0-84940496335	Production of anhydrous ethanol in large scale has been made by extractive distillation using solvents such as ethylene-glycol or glycerol. In this work, azeotropic distillation is studied to dehydrate...	NA	12th International Symposium on Process Systems Engineering and 25th European Symposium on Computer Aided Process Engineering	NA	Safety | Anhydrous ethanol | Azeotropic distillation | Bio-ethanol	NA	ethanol_/_bioethanol
34	1-s2.0-B9780444639653501136	TRUE	DOI:10.1016/B978-0-444-63965-3.50113-6	https://api.elsevier.com/content/article/pii/B9780444639653501136	Methodology for biomass blending for the production of power and fuels from biogas	Borja, HernÃƒÂ¡ndez	Abstract In this work a mathematical formulation is proposed to evaluate the optimal use of waste among cattle and pig slurry, cattle and pig manure, sludge, urban food waste and urban green waste for the production of chemicals, i.e. methanol, dimethyl ether and fuels, ethanol, methane or FT fuels, via anaerobic digestion and hybrid reforming. Detailed models for the process are developed to det…	Computer Aided Chemical Engineering	9780444639653	15707946	40	NA	2017-01-01	2017	667	672	10.1016/B978-0-444-63965-3.50113-6	0	FALSE	FALSE	NA	Book Series	Copyright Ã‚Â© 2017 Elsevier B.V. All rights reserved.	B978-0-444-63965-3.50113-6	85041412171	2-s2.0-85041412171	In this work a mathematical formulation is proposed to evaluate the optimal use of waste among cattle and pig slurry, cattle and pig manure, sludge, urban food waste and urban green waste for the production...	NA	27th European Symposium on Computer Aided Process Engineering	NA	Biogas | waste blending | mathematical optimization	NA	ethanol_/_bioethanol
35	1-s2.0-B9780444639653501136	TRUE	DOI:10.1016/B978-0-444-63965-3.50113-6	https://api.elsevier.com/content/article/pii/B9780444639653501136	Methodology for biomass blending for the production of power and fuels from biogas	Borja, HernÃƒÂ¡ndez	Abstract In this work a mathematical formulation is proposed to evaluate the optimal use of waste among cattle and pig slurry, cattle and pig manure, sludge, urban food waste and urban green waste for the production of chemicals, i.e. methanol, dimethyl ether and fuels, ethanol, methane or FT fuels, via anaerobic digestion and hybrid reforming. Detailed models for the process are developed to det…	Computer Aided Chemical Engineering	9780444639653	15707946	40	NA	2017-01-01	2017	667	672	10.1016/B978-0-444-63965-3.50113-6	0	FALSE	FALSE	NA	Book Series	Copyright Ã‚Â© 2017 Elsevier B.V. All rights reserved.	B978-0-444-63965-3.50113-6	85041412171	2-s2.0-85041412171	In this work a mathematical formulation is proposed to evaluate the optimal use of waste among cattle and pig slurry, cattle and pig manure, sludge, urban food waste and urban green waste for the production...	NA	27th European Symposium on Computer Aided Process Engineering	NA	Biogas | waste blending | mathematical optimization	NA	cattle_manure
36	1-s2.0-B9780444639653501136	TRUE	DOI:10.1016/B978-0-444-63965-3.50113-6	https://api.elsevier.com/content/article/pii/B9780444639653501136	Methodology for biomass blending for the production of power and fuels from biogas	Borja, HernÃƒÂ¡ndez	Abstract In this work a mathematical formulation is proposed to evaluate the optimal use of waste among cattle and pig slurry, cattle and pig manure, sludge, urban food waste and urban green waste for the production of chemicals, i.e. methanol, dimethyl ether and fuels, ethanol, methane or FT fuels, via anaerobic digestion and hybrid reforming. Detailed models for the process are developed to det…	Computer Aided Chemical Engineering	9780444639653	15707946	40	NA	2017-01-01	2017	667	672	10.1016/B978-0-444-63965-3.50113-6	0	FALSE	FALSE	NA	Book Series	Copyright Ã‚Â© 2017 Elsevier B.V. All rights reserved.	B978-0-444-63965-3.50113-6	85041412171	2-s2.0-85041412171	In this work a mathematical formulation is proposed to evaluate the optimal use of waste among cattle and pig slurry, cattle and pig manure, sludge, urban food waste and urban green waste for the production...	NA	27th European Symposium on Computer Aided Process Engineering	NA	Biogas | waste blending | mathematical optimization	NA	dimethylether_(dme)
37	1-s2.0-B9780444639653501446	TRUE	DOI:10.1016/B978-0-444-63965-3.50144-6	https://api.elsevier.com/content/article/pii/B9780444639653501446	Integrated Process Design Optimization Accounting for Co-Digestion of Sludge and Municipal Solid Waste	Betzabet, Morero	Abstract This work presents an optimization model for the integrated design of waste treatment facilities, accounting for co-digestion of sludge and municipal solid waste. The superstructure of alternatives includes anaerobic digestion under mesophilic or thermophilic conditions, composting, recycling, and final disposal in a landfill. Anaerobic digesters can be fed with different mixing ratios o…	Computer Aided Chemical Engineering	9780444639653	15707946	40	NA	2017-01-01	2017	853	858	10.1016/B978-0-444-63965-3.50144-6	0	FALSE	FALSE	NA	Book Series	Copyright Ã‚Â© 2017 Elsevier B.V. All rights reserved.	B978-0-444-63965-3.50144-6	85041384082	2-s2.0-85041384082	This work presents an optimization model for the integrated design of waste treatment facilities, accounting for co-digestion of sludge and municipal solid waste. The superstructure of alternatives...	NA	27th European Symposium on Computer Aided Process Engineering	NA	Co-digestion | Waste | Optimization | Superstructure | Process Design	NA	fertilizer
38	1-s2.0-B9780444639653501446	TRUE	DOI:10.1016/B978-0-444-63965-3.50144-6	https://api.elsevier.com/content/article/pii/B9780444639653501446	Integrated Process Design Optimization Accounting for Co-Digestion of Sludge and Municipal Solid Waste	Betzabet, Morero	Abstract This work presents an optimization model for the integrated design of waste treatment facilities, accounting for co-digestion of sludge and municipal solid waste. The superstructure of alternatives includes anaerobic digestion under mesophilic or thermophilic conditions, composting, recycling, and final disposal in a landfill. Anaerobic digesters can be fed with different mixing ratios o…	Computer Aided Chemical Engineering	9780444639653	15707946	40	NA	2017-01-01	2017	853	858	10.1016/B978-0-444-63965-3.50144-6	0	FALSE	FALSE	NA	Book Series	Copyright Ã‚Â© 2017 Elsevier B.V. All rights reserved.	B978-0-444-63965-3.50144-6	85041384082	2-s2.0-85041384082	This work presents an optimization model for the integrated design of waste treatment facilities, accounting for co-digestion of sludge and municipal solid waste. The superstructure of alternatives...	NA	27th European Symposium on Computer Aided Process Engineering	NA	Co-digestion | Waste | Optimization | Superstructure | Process Design	NA	compost
39	1-s2.0-B9780444639653501446	TRUE	DOI:10.1016/B978-0-444-63965-3.50144-6	https://api.elsevier.com/content/article/pii/B9780444639653501446	Integrated Process Design Optimization Accounting for Co-Digestion of Sludge and Municipal Solid Waste	Betzabet, Morero	Abstract This work presents an optimization model for the integrated design of waste treatment facilities, accounting for co-digestion of sludge and municipal solid waste. The superstructure of alternatives includes anaerobic digestion under mesophilic or thermophilic conditions, composting, recycling, and final disposal in a landfill. Anaerobic digesters can be fed with different mixing ratios o…	Computer Aided Chemical Engineering	9780444639653	15707946	40	NA	2017-01-01	2017	853	858	10.1016/B978-0-444-63965-3.50144-6	0	FALSE	FALSE	NA	Book Series	Copyright Ã‚Â© 2017 Elsevier B.V. All rights reserved.	B978-0-444-63965-3.50144-6	85041384082	2-s2.0-85041384082	This work presents an optimization model for the integrated design of waste treatment facilities, accounting for co-digestion of sludge and municipal solid waste. The superstructure of alternatives...	NA	27th European Symposium on Computer Aided Process Engineering	NA	Co-digestion | Waste | Optimization | Superstructure | Process Design	NA	organic_housewaste
40	1-s2.0-B9780444639653503366	TRUE	DOI:10.1016/B978-0-444-63965-3.50336-6	https://api.elsevier.com/content/article/pii/B9780444639653503366	Optimal Global Land Use, Cultivation, Transportation, and Production Strategies to Minimise Life Cycle Greenhouse Gas Emissions of Ethanol	Daniel J., Garcia	Abstract Greenhouse gas (GHG) emissions throughout the biofuels life cycle stem from many sources, such as feedstock cultivation, transportation, production, and land use change (LUC). No work has identified biomass sourcing and ethanol productions strategies with state-of-the-art LUC models to minimise life cycle GHG emissions of biofuels including emissions from LUC. We integrate state-of-the-a…	Computer Aided Chemical Engineering	9780444639653	15707946	40	NA	2017-01-01	2017	2005	2010	10.1016/B978-0-444-63965-3.50336-6	0	FALSE	FALSE	NA	Book Series	Copyright Ã‚Â© 2017 Elsevier B.V. All rights reserved.	B978-0-444-63965-3.50336-6	85041392005	2-s2.0-85041392005	Greenhouse gas (GHG) emissions throughout the biofuels life cycle stem from many sources, such as feedstock cultivation, transportation, production, and land use change (LUC). No work has identified...	NA	27th European Symposium on Computer Aided Process Engineering	NA	Biofuels | sustainability | computable general equilibrium modelling	NA	ethanol_/_bioethanol
41	1-s2.0-B9780444639653503366	TRUE	DOI:10.1016/B978-0-444-63965-3.50336-6	https://api.elsevier.com/content/article/pii/B9780444639653503366	Optimal Global Land Use, Cultivation, Transportation, and Production Strategies to Minimise Life Cycle Greenhouse Gas Emissions of Ethanol	Daniel J., Garcia	Abstract Greenhouse gas (GHG) emissions throughout the biofuels life cycle stem from many sources, such as feedstock cultivation, transportation, production, and land use change (LUC). No work has identified biomass sourcing and ethanol productions strategies with state-of-the-art LUC models to minimise life cycle GHG emissions of biofuels including emissions from LUC. We integrate state-of-the-a…	Computer Aided Chemical Engineering	9780444639653	15707946	40	NA	2017-01-01	2017	2005	2010	10.1016/B978-0-444-63965-3.50336-6	0	FALSE	FALSE	NA	Book Series	Copyright Ã‚Â© 2017 Elsevier B.V. All rights reserved.	B978-0-444-63965-3.50336-6	85041392005	2-s2.0-85041392005	Greenhouse gas (GHG) emissions throughout the biofuels life cycle stem from many sources, such as feedstock cultivation, transportation, production, and land use change (LUC). No work has identified...	NA	27th European Symposium on Computer Aided Process Engineering	NA	Biofuels | sustainability | computable general equilibrium modelling	NA	maize_stover
42	1-s2.0-B9780444642417502639	TRUE	DOI:10.1016/B978-0-444-64241-7.50263-9	https://api.elsevier.com/content/article/pii/B9780444642417502639	Optimal planning of a waste management supply chain	Maryam, Mohammadi	Abstract In this paper, a mixed integer linear programming (MILP) model for the optimization of a municipal solid waste (MSW) system in a supply chain (SC) network is presented with the aim of maximizing the total net profit over a specified time horizon. The proposed model covers waste collection at sites, separation at dumps, and processing for waste recycling and waste to energy (WtE) producti…	Computer Aided Chemical Engineering	9780444642417	15707946	44	NA	2018-01-01	2018	1609	1614	10.1016/B978-0-444-64241-7.50263-9	0	FALSE	FALSE	NA	Book Series	Copyright Ã‚Â© 2018 Elsevier B.V. All rights reserved.	B978-0-444-64241-7.50263-9	85050597116	2-s2.0-85050597116	In this paper, a mixed integer linear programming (MILP) model for the optimization of a municipal solid waste (MSW) system in a supply chain (SC) network is presented with the aim of maximizing the...	NA	13th International Symposium on Process Systems Engineering (PSE 2018)	NA	municipal solid waste | supply chain | mixed integer linear programming	NA	organic_housewaste
43	1-s2.0-B9780444642417502639	TRUE	DOI:10.1016/B978-0-444-64241-7.50263-9	https://api.elsevier.com/content/article/pii/B9780444642417502639	Optimal planning of a waste management supply chain	Maryam, Mohammadi	Abstract In this paper, a mixed integer linear programming (MILP) model for the optimization of a municipal solid waste (MSW) system in a supply chain (SC) network is presented with the aim of maximizing the total net profit over a specified time horizon. The proposed model covers waste collection at sites, separation at dumps, and processing for waste recycling and waste to energy (WtE) producti…	Computer Aided Chemical Engineering	9780444642417	15707946	44	NA	2018-01-01	2018	1609	1614	10.1016/B978-0-444-64241-7.50263-9	0	FALSE	FALSE	NA	Book Series	Copyright Ã‚Â© 2018 Elsevier B.V. All rights reserved.	B978-0-444-64241-7.50263-9	85050597116	2-s2.0-85050597116	In this paper, a mixed integer linear programming (MILP) model for the optimization of a municipal solid waste (MSW) system in a supply chain (SC) network is presented with the aim of maximizing the...	NA	13th International Symposium on Process Systems Engineering (PSE 2018)	NA	municipal solid waste | supply chain | mixed integer linear programming	NA	dedicated_combustion_/_incineration
44	1-s2.0-B9780444642417502779	TRUE	DOI:10.1016/B978-0-444-64241-7.50277-9	https://api.elsevier.com/content/article/pii/B9780444642417502779	Life cycle assessment of bio-based sustainable polylimonene carbonate production processes	Dongda, Zhang	Abstract Biomass derived polymers are considered as promising candidates to replace petroleum based polymers due to their potential environmental friendliness. To facilitate their application, in this study, a newly proposed biopolymer, polylimonene carbonate, was chosen as the representative to investigate the environmental impacts of the biopolymer production process. Different feedstocks (citr…	Computer Aided Chemical Engineering	9780444642417	15707946	44	NA	2018-01-01	2018	1693	1698	10.1016/B978-0-444-64241-7.50277-9	0	FALSE	FALSE	NA	Book Series	Copyright Ã‚Â© 2018 Elsevier B.V. All rights reserved.	B978-0-444-64241-7.50277-9	85050633023	2-s2.0-85050633023	Biomass derived polymers are considered as promising candidates to replace petroleum based polymers due to their potential environmental friendliness. To facilitate their application, in this study,...	NA	13th International Symposium on Process Systems Engineering (PSE 2018)	NA	biomass | life cycle assessment | polylimonene carbonate | process simulation | economic analysis	NA	polystyrene_(ps)
45	1-s2.0-B9780444642417502779	TRUE	DOI:10.1016/B978-0-444-64241-7.50277-9	https://api.elsevier.com/content/article/pii/B9780444642417502779	Life cycle assessment of bio-based sustainable polylimonene carbonate production processes	Dongda, Zhang	Abstract Biomass derived polymers are considered as promising candidates to replace petroleum based polymers due to their potential environmental friendliness. To facilitate their application, in this study, a newly proposed biopolymer, polylimonene carbonate, was chosen as the representative to investigate the environmental impacts of the biopolymer production process. Different feedstocks (citr…	Computer Aided Chemical Engineering	9780444642417	15707946	44	NA	2018-01-01	2018	1693	1698	10.1016/B978-0-444-64241-7.50277-9	0	FALSE	FALSE	NA	Book Series	Copyright Ã‚Â© 2018 Elsevier B.V. All rights reserved.	B978-0-444-64241-7.50277-9	85050633023	2-s2.0-85050633023	Biomass derived polymers are considered as promising candidates to replace petroleum based polymers due to their potential environmental friendliness. To facilitate their application, in this study,...	NA	13th International Symposium on Process Systems Engineering (PSE 2018)	NA	biomass | life cycle assessment | polylimonene carbonate | process simulation | economic analysis	NA	green_solvents
46	1-s2.0-B9780444642417502779	TRUE	DOI:10.1016/B978-0-444-64241-7.50277-9	https://api.elsevier.com/content/article/pii/B9780444642417502779	Life cycle assessment of bio-based sustainable polylimonene carbonate production processes	Dongda, Zhang	Abstract Biomass derived polymers are considered as promising candidates to replace petroleum based polymers due to their potential environmental friendliness. To facilitate their application, in this study, a newly proposed biopolymer, polylimonene carbonate, was chosen as the representative to investigate the environmental impacts of the biopolymer production process. Different feedstocks (citr…	Computer Aided Chemical Engineering	9780444642417	15707946	44	NA	2018-01-01	2018	1693	1698	10.1016/B978-0-444-64241-7.50277-9	0	FALSE	FALSE	NA	Book Series	Copyright Ã‚Â© 2018 Elsevier B.V. All rights reserved.	B978-0-444-64241-7.50277-9	85050633023	2-s2.0-85050633023	Biomass derived polymers are considered as promising candidates to replace petroleum based polymers due to their potential environmental friendliness. To facilitate their application, in this study,...	NA	13th International Symposium on Process Systems Engineering (PSE 2018)	NA	biomass | life cycle assessment | polylimonene carbonate | process simulation | economic analysis	NA	citrus_bagasse
47	1-s2.0-S0003267006024627	TRUE	DOI:10.1016/j.aca.2006.12.051	https://api.elsevier.com/content/article/pii/S0003267006024627	Simultaneous determination of glycerol and clavulanic acid in an antibiotic bioprocess using attenuated total reflectance mid infrared spectroscopy	Payal, Roychoudhury	Abstract Attenuated total reflectance mid infrared (ATR-MIR) spectroscopy is a potential technique for the near real-time monitoring of filamentous bioprocesses. Here we investigate the utility of ATR-MIR to monitor and predict concentrations of glycerol and product (clavulanic acid) in a complex antibiotic bioprocess. Streptomyces clavuligerus exhibits filamentous growth, thus, as biomass accumu…	Analytica Chimica Acta	NA	32670	585	2	2007-03-07	2007-03-07	246	252	10.1016/j.aca.2006.12.051	0	FALSE	FALSE	NA	Journal	Copyright Ã‚Â© 2007 Elsevier B.V. All rights reserved.	S0003-2670(06)02462-7	33846572945	2-s2.0-33846572945	Attenuated total reflectance mid infrared (ATR-MIR) spectroscopy is a potential technique for the near real-time monitoring of filamentous bioprocesses. Here we investigate the utility of ATR-MIR to...	17386672	NA	NA	Attenuated total reflectance mid infrared spectroscopy | Streptomyces | Multivariate statistical technique | Partial least square	NA	glycerol
48	1-s2.0-S0003269704006852	TRUE	DOI:10.1016/j.ab.2004.08.022	https://api.elsevier.com/content/article/pii/S0003269704006852	N-[3H]Benzoylglycylglycylglycine as a probe for hydroxyl radicals	Janice G., Miller	Abstract N-[4-3H]Benzoylglycylglycylglycine ([3H]BzG3) was tested as a probe for detecting hydroxyl radicals (OH). Aerated solutions of l-ascorbate generated OH, which oxidized [3H]BzG3, yielding hydrophilic (probably hydroxylated) derivatives plus tritiated water. The 3H2O was separated from organic products and remaining [3H]BzG3 on Dowex-1. 3H2O production was much greater with OH than with ot…	Analytical Biochemistry	NA	32697	335	1	2004-12-01	2004-12-01	126	134	10.1016/j.ab.2004.08.022	0	FALSE	FALSE	NA	Journal	Copyright Ã‚Â© 2004 Elsevier Inc. All rights reserved.	S0003-2697(04)00685-2	7444238978	2-s2.0-7444238978	N-[4-3H]Benzoylglycylglycylglycine ([3H]BzG3) was tested as a probe for detecting hydroxyl radicals (OH). Aerated solutions of l-ascorbate generated OH, which oxidized [3H]BzG3, yielding hydrophilic...	15519580	NA	NA	Hydroxyl radical | Polysaccharide scission | Tritium | Apoplast | Scavengers | Hydrogen peroxide | Superoxide | Xyloglucan | Pectin | Cell wall (plants) | Arthritis	NA	glycerol
49	1-s2.0-S0009250900003845	TRUE	DOI:10.1016/S0009-2509(00)00384-5	https://api.elsevier.com/content/article/pii/S0009250900003845	Electrolytic abatement of biorefractory organics by combining bulk and electrode oxidation processes	Guido, Saracco	Abstract Electrochemical oxidation is a promising abatement process for organic substances which are recalcitrant to biological degradation. The anodic oxidation of coumaric acid, a pollutant of olive oil manufacturing waste waters, was evaluated on several electrode materials: PtÃ¢â‚¬â€œTi, PbO2, RuÃ¢â‚¬â€œTi. The effect of the applied current density, pH, temperature, the electrolyte (Na2SO4) c…	Chemical Engineering Science	NA	92509	56	4	2001-02-01	2001-02-01	1571	1578	10.1016/S0009-2509(00)00384-5	0	FALSE	FALSE	NA	Journal	Copyright Ã‚Â© 2001 Elsevier Science Ltd. All rights reserved.	S0009-2509(00)00384-5	35911599	2-s2.0-0035911599	Electrochemical oxidation is a promising abatement process for organic substances which are recalcitrant to biological degradation. The anodic oxidation of coumaric acid, a pollutant of olive oil manufacturing...	NA	16th International Conference on Chemical Reactor Engineering	NA	p-hydroxy coumaric acid | Electrochemical oxidation | Fenton reactant | PtÃ¢â‚¬â€œTi | PbO2 | RuÃ¢â‚¬â€œTi anode | Hydrogen peroxide	NA	comeric_acid
50	1-s2.0-S0009250900003845	TRUE	DOI:10.1016/S0009-2509(00)00384-5	https://api.elsevier.com/content/article/pii/S0009250900003845	Electrolytic abatement of biorefractory organics by combining bulk and electrode oxidation processes	Guido, Saracco	Abstract Electrochemical oxidation is a promising abatement process for organic substances which are recalcitrant to biological degradation. The anodic oxidation of coumaric acid, a pollutant of olive oil manufacturing waste waters, was evaluated on several electrode materials: PtÃ¢â‚¬â€œTi, PbO2, RuÃ¢â‚¬â€œTi. The effect of the applied current density, pH, temperature, the electrolyte (Na2SO4) c…	Chemical Engineering Science	NA	92509	56	4	2001-02-01	2001-02-01	1571	1578	10.1016/S0009-2509(00)00384-5	0	FALSE	FALSE	NA	Journal	Copyright Ã‚Â© 2001 Elsevier Science Ltd. All rights reserved.	S0009-2509(00)00384-5	35911599	2-s2.0-0035911599	Electrochemical oxidation is a promising abatement process for organic substances which are recalcitrant to biological degradation. The anodic oxidation of coumaric acid, a pollutant of olive oil manufacturing...	NA	16th International Conference on Chemical Reactor Engineering	NA	p-hydroxy coumaric acid | Electrochemical oxidation | Fenton reactant | PtÃ¢â‚¬â€œTi | PbO2 | RuÃ¢â‚¬â€œTi anode | Hydrogen peroxide	NA	oilseed_processing_wastewater
51	1-s2.0-S0009250914003807	TRUE	DOI:10.1016/j.ces.2014.07.035	https://api.elsevier.com/content/article/pii/S0009250914003807	Integrating first, second, and third generation biorefineries: Incorporating microalgae into the sugarcane biorefinery	Jonathan, Moncada	Abstract In this study, it was discussed the possibilities of integrating biorefineries based on different generations of feedstock. The potential of using CO2-rich streams was analyzed for the cultivation and harvesting of microalgae biomass. In addition, the extraction of microalgae oil and its further transformation into biodiesel was considered. To achieve this, a techno-economic and environm…	Chemical Engineering Science	NA	92509	118	NA	2014-10-18	2014-10-18	126	140	10.1016/j.ces.2014.07.035	0	FALSE	FALSE	NA	Journal	Copyright Ã‚Â© 2014 Elsevier Ltd. All rights reserved.	S0009-2509(14)00380-7	84905679301	2-s2.0-84905679301	In this study, it was discussed the possibilities of integrating biorefineries based on different generations of feedstock. The potential of using CO2-rich streams was analyzed for the cultivation and...	NA	NA	NA	Integrated biorefinery | Hierarchy | Integration | Microalgae | Sequence | Sugarcane	NA	biodiesel
52	1-s2.0-S0009250914003807	TRUE	DOI:10.1016/j.ces.2014.07.035	https://api.elsevier.com/content/article/pii/S0009250914003807	Integrating first, second, and third generation biorefineries: Incorporating microalgae into the sugarcane biorefinery	Jonathan, Moncada	Abstract In this study, it was discussed the possibilities of integrating biorefineries based on different generations of feedstock. The potential of using CO2-rich streams was analyzed for the cultivation and harvesting of microalgae biomass. In addition, the extraction of microalgae oil and its further transformation into biodiesel was considered. To achieve this, a techno-economic and environm…	Chemical Engineering Science	NA	92509	118	NA	2014-10-18	2014-10-18	126	140	10.1016/j.ces.2014.07.035	0	FALSE	FALSE	NA	Journal	Copyright Ã‚Â© 2014 Elsevier Ltd. All rights reserved.	S0009-2509(14)00380-7	84905679301	2-s2.0-84905679301	In this study, it was discussed the possibilities of integrating biorefineries based on different generations of feedstock. The potential of using CO2-rich streams was analyzed for the cultivation and...	NA	NA	NA	Integrated biorefinery | Hierarchy | Integration | Microalgae | Sequence | Sugarcane	NA	glycerol
53	1-s2.0-S0009250914003807	TRUE	DOI:10.1016/j.ces.2014.07.035	https://api.elsevier.com/content/article/pii/S0009250914003807	Integrating first, second, and third generation biorefineries: Incorporating microalgae into the sugarcane biorefinery	Jonathan, Moncada	Abstract In this study, it was discussed the possibilities of integrating biorefineries based on different generations of feedstock. The potential of using CO2-rich streams was analyzed for the cultivation and harvesting of microalgae biomass. In addition, the extraction of microalgae oil and its further transformation into biodiesel was considered. To achieve this, a techno-economic and environm…	Chemical Engineering Science	NA	92509	118	NA	2014-10-18	2014-10-18	126	140	10.1016/j.ces.2014.07.035	0	FALSE	FALSE	NA	Journal	Copyright Ã‚Â© 2014 Elsevier Ltd. All rights reserved.	S0009-2509(14)00380-7	84905679301	2-s2.0-84905679301	In this study, it was discussed the possibilities of integrating biorefineries based on different generations of feedstock. The potential of using CO2-rich streams was analyzed for the cultivation and...	NA	NA	NA	Integrated biorefinery | Hierarchy | Integration | Microalgae | Sequence | Sugarcane	NA	ethanol_/_bioethanol
54	1-s2.0-S0009250915002493	TRUE	DOI:10.1016/j.ces.2015.03.065	https://api.elsevier.com/content/article/pii/S0009250915002493	Stability evaluation of fast pyrolysis oil from rice straw	Hao, Li	Abstract Because of the shortage of oil resources and the deteriorating environmental problems, the biomass fast pyrolysis oil deservedly offers an opportunity as alternatives to replace fossil fuels due to its renewable characteristics. However, pyrolysis oil is an unstable product and the physical and chemical properties are changing during storage, which limit its application. In this work, th…	Chemical Engineering Science	NA	92509	135	NA	2015-10-02	2015-10-02	258	265	10.1016/j.ces.2015.03.065	0	FALSE	FALSE	NA	Journal	Copyright Ã‚Â© 2015 Elsevier Ltd. All rights reserved.	S0009-2509(15)00249-3	84948719338	2-s2.0-84948719338	Because of the shortage of oil resources and the deteriorating environmental problems, the biomass fast pyrolysis oil deservedly offers an opportunity as alternatives to replace fossil fuels due to...	NA	SI:TJU 120th anniversary	NA	Pyrolysis oil | Atmospheric distillation | Stability | Volatiles	NA	pyrolysis_oil
55	1-s2.0-S0009250915002493	TRUE	DOI:10.1016/j.ces.2015.03.065	https://api.elsevier.com/content/article/pii/S0009250915002493	Stability evaluation of fast pyrolysis oil from rice straw	Hao, Li	Abstract Because of the shortage of oil resources and the deteriorating environmental problems, the biomass fast pyrolysis oil deservedly offers an opportunity as alternatives to replace fossil fuels due to its renewable characteristics. However, pyrolysis oil is an unstable product and the physical and chemical properties are changing during storage, which limit its application. In this work, th…	Chemical Engineering Science	NA	92509	135	NA	2015-10-02	2015-10-02	258	265	10.1016/j.ces.2015.03.065	0	FALSE	FALSE	NA	Journal	Copyright Ã‚Â© 2015 Elsevier Ltd. All rights reserved.	S0009-2509(15)00249-3	84948719338	2-s2.0-84948719338	Because of the shortage of oil resources and the deteriorating environmental problems, the biomass fast pyrolysis oil deservedly offers an opportunity as alternatives to replace fossil fuels due to...	NA	SI:TJU 120th anniversary	NA	Pyrolysis oil | Atmospheric distillation | Stability | Volatiles	NA	rice_straw	rice_straw
56	1-s2.0-S0011224015001698	TRUE	DOI:10.1016/j.cryobiol.2015.05.063	https://api.elsevier.com/content/article/pii/S0011224015001698	57. A transmembrane mega highway for cryoprotective agent delivery via self-assembling organic nanopores with tunable function	Xiaoxi, Wei	Cryoprotective agents (CPAs) are critical additives that improve the post-thaw viability of cryopreserved biological systems by preventing ice crystal nucleation and growth. Membrane permeable CPAs also prevent osmotic shrinkage of the cells and reduce the volume of available water by penetrating and equilibrating across the cell membrane. All known CPAs exhibit various levels of cytotoxicity at …	Cryobiology	NA	112240	71	1	2015-08-01	2015-08-01	179	NA	10.1016/j.cryobiol.2015.05.063	0	FALSE	FALSE	NA	Journal	NA	S0011-2240(15)00169-8	NA	NA	Cryoprotective agents (CPAs) are critical additives that improve the post-thaw viability of cryopreserved biological systems by preventing ice crystal nucleation and growth. Membrane permeable CPAs...	NA	NA	NA	NA	NA	glycerol
57	1-s2.0-S0011916411002530	TRUE	DOI:10.1016/j.desal.2011.03.035	https://api.elsevier.com/content/article/pii/S0011916411002530	Utilization of silica gel waste for adsorption of cationic surfactant and adsolubilization of organics from textile wastewater: A case study	Suman, Koner	Abstract The use of silica gel waste (SGW) as an adsorbent was found to be a very attractive alternative for removal of cationic surfactant (CS) from industrial (textile) wastewater. In the present work, the actual textile wastewater containing 362mg/l CS (in terms of CTAB) was treated by SGW in both batch and continuous modes. In batch mode, the optimum adsorbent dose and equilibrium time were f…	Desalination	NA	119164	276	1	2011-08-02	2011-08-02	142	147	10.1016/j.desal.2011.03.035	0	FALSE	FALSE	NA	Journal	Copyright Ã‚Â© 2011 Elsevier B.V. All rights reserved.	S0011-9164(11)00253-0	79959511005	2-s2.0-79959511005	The use of silica gel waste (SGW) as an adsorbent was found to be a very attractive alternative for removal of cationic surfactant (CS) from industrial (textile) wastewater. In the present work, the...	NA	NA	NA	Adsorption | Cationic surfactant | Silica gel waste | Textile wastewater | Adsolubilization	NA	bio-absorbent
58	1-s2.0-S0011916411002530	TRUE	DOI:10.1016/j.desal.2011.03.035	https://api.elsevier.com/content/article/pii/S0011916411002530	Utilization of silica gel waste for adsorption of cationic surfactant and adsolubilization of organics from textile wastewater: A case study	Suman, Koner	Abstract The use of silica gel waste (SGW) as an adsorbent was found to be a very attractive alternative for removal of cationic surfactant (CS) from industrial (textile) wastewater. In the present work, the actual textile wastewater containing 362mg/l CS (in terms of CTAB) was treated by SGW in both batch and continuous modes. In batch mode, the optimum adsorbent dose and equilibrium time were f…	Desalination	NA	119164	276	1	2011-08-02	2011-08-02	142	147	10.1016/j.desal.2011.03.035	0	FALSE	FALSE	NA	Journal	Copyright Ã‚Â© 2011 Elsevier B.V. All rights reserved.	S0011-9164(11)00253-0	79959511005	2-s2.0-79959511005	The use of silica gel waste (SGW) as an adsorbent was found to be a very attractive alternative for removal of cationic surfactant (CS) from industrial (textile) wastewater. In the present work, the...	NA	NA	NA	Adsorption | Cationic surfactant | Silica gel waste | Textile wastewater | Adsolubilization	NA	textile_industry_wastewater
59	1-s2.0-S0011916411002530	TRUE	DOI:10.1016/j.desal.2011.03.035	https://api.elsevier.com/content/article/pii/S0011916411002530	Utilization of silica gel waste for adsorption of cationic surfactant and adsolubilization of organics from textile wastewater: A case study	Suman, Koner	Abstract The use of silica gel waste (SGW) as an adsorbent was found to be a very attractive alternative for removal of cationic surfactant (CS) from industrial (textile) wastewater. In the present work, the actual textile wastewater containing 362mg/l CS (in terms of CTAB) was treated by SGW in both batch and continuous modes. In batch mode, the optimum adsorbent dose and equilibrium time were f…	Desalination	NA	119164	276	1	2011-08-02	2011-08-02	142	147	10.1016/j.desal.2011.03.035	0	FALSE	FALSE	NA	Journal	Copyright Ã‚Â© 2011 Elsevier B.V. All rights reserved.	S0011-9164(11)00253-0	79959511005	2-s2.0-79959511005	The use of silica gel waste (SGW) as an adsorbent was found to be a very attractive alternative for removal of cationic surfactant (CS) from industrial (textile) wastewater. In the present work, the...	NA	NA	NA	Adsorption | Cationic surfactant | Silica gel waste | Textile wastewater | Adsolubilization	NA	bio_surfactant
60	1-s2.0-S0013468600005946	TRUE	DOI:10.1016/S0013-4686(00)00594-6	https://api.elsevier.com/content/article/pii/S0013468600005946	Electrochemical oxidation of organic pollutants at low electrolyte concentrations	Guido, Saracco	Abstract The electrochemical oxidation of organic pollutants is a promising process for substances which are recalcitrant to biological degradation. The anodic oxidation of coumaric acid, which is a biorefractory organic pollutant of olive oil manufacturing waste waters, was evaluated on a PtÃ¢â‚¬â€œTi electrode. The operating test conditions were compatible with direct discharge of the after-tre…	Electrochimica Acta	NA	134686	46	2	2000-11-01	2000-11-01	373	380	10.1016/S0013-4686(00)00594-6	0	FALSE	FALSE	NA	Journal	Copyright Ã‚Â© 2000 Elsevier Science Ltd. All rights reserved.	S0013-4686(00)00594-6	34317651	2-s2.0-0034317651	The electrochemical oxidation of organic pollutants is a promising process for substances which are recalcitrant to biological degradation. The anodic oxidation of coumaric acid, which is a biorefractory...	NA	NA	NA	p-Hydroxy coumaric acid | Electrochemical oxidation | Fenton reactant | PtÃ¢â‚¬â€œTi electrode | Hydrogen peroxide	NA	oilseed_processing_wastewater
61	1-s2.0-S0013468600005946	TRUE	DOI:10.1016/S0013-4686(00)00594-6	https://api.elsevier.com/content/article/pii/S0013468600005946	Electrochemical oxidation of organic pollutants at low electrolyte concentrations	Guido, Saracco	Abstract The electrochemical oxidation of organic pollutants is a promising process for substances which are recalcitrant to biological degradation. The anodic oxidation of coumaric acid, which is a biorefractory organic pollutant of olive oil manufacturing waste waters, was evaluated on a PtÃ¢â‚¬â€œTi electrode. The operating test conditions were compatible with direct discharge of the after-tre…	Electrochimica Acta	NA	134686	46	2	2000-11-01	2000-11-01	373	380	10.1016/S0013-4686(00)00594-6	0	FALSE	FALSE	NA	Journal	Copyright Ã‚Â© 2000 Elsevier Science Ltd. All rights reserved.	S0013-4686(00)00594-6	34317651	2-s2.0-0034317651	The electrochemical oxidation of organic pollutants is a promising process for substances which are recalcitrant to biological degradation. The anodic oxidation of coumaric acid, which is a biorefractory...	NA	NA	NA	p-Hydroxy coumaric acid | Electrochemical oxidation | Fenton reactant | PtÃ¢â‚¬â€œTi electrode | Hydrogen peroxide	NA	comeric_acid
62	1-s2.0-S0013468606010097	TRUE	DOI:10.1016/j.electacta.2006.06.048	https://api.elsevier.com/content/article/pii/S0013468606010097	Screening the possibility for removing cadmium and other heavy metals from wastewater sludge and bio-ashes by an electrodialytic method	Lisbeth M., Ottosen	Abstract Both wastewater sludge and fly ash from combustion of biomass (bio-ash) have traditionally been applied to agricultural land in Denmark. However, Cd concentrations often exceed limiting values. The present study is a preliminary investigation of the possibility for reducing the Cd concentration in wastewater sludge and bio-ashes (straw and wood) using an electrodialytic method. The waste…	Electrochimica Acta	NA	134686	52	10	2007-02-25	2007-02-25	3420	3426	10.1016/j.electacta.2006.06.048	0	FALSE	FALSE	NA	Journal	Copyright Ã‚Â© 2006 Elsevier Ltd. All rights reserved.	S0013-4686(06)01009-7	33846871720	2-s2.0-33846871720	Both wastewater sludge and fly ash from combustion of biomass (bio-ash) have traditionally been applied to agricultural land in Denmark. However, Cd concentrations often exceed limiting values. The...	NA	ELECTROKINETIC REMEDIATION METHODS OF REMEDIATION OF SOILS AND GROUND WATERS	NA	Electrokinetics | Bio-ash | Wastewater sludge | Heavy metal | Cadmium	NA	dedicated_combustion_/_incineration
63	1-s2.0-S0013468606010097	TRUE	DOI:10.1016/j.electacta.2006.06.048	https://api.elsevier.com/content/article/pii/S0013468606010097	Screening the possibility for removing cadmium and other heavy metals from wastewater sludge and bio-ashes by an electrodialytic method	Lisbeth M., Ottosen	Abstract Both wastewater sludge and fly ash from combustion of biomass (bio-ash) have traditionally been applied to agricultural land in Denmark. However, Cd concentrations often exceed limiting values. The present study is a preliminary investigation of the possibility for reducing the Cd concentration in wastewater sludge and bio-ashes (straw and wood) using an electrodialytic method. The waste…	Electrochimica Acta	NA	134686	52	10	2007-02-25	2007-02-25	3420	3426	10.1016/j.electacta.2006.06.048	0	FALSE	FALSE	NA	Journal	Copyright Ã‚Â© 2006 Elsevier Ltd. All rights reserved.	S0013-4686(06)01009-7	33846871720	2-s2.0-33846871720	Both wastewater sludge and fly ash from combustion of biomass (bio-ash) have traditionally been applied to agricultural land in Denmark. However, Cd concentrations often exceed limiting values. The...	NA	ELECTROKINETIC REMEDIATION METHODS OF REMEDIATION OF SOILS AND GROUND WATERS	NA	Electrokinetics | Bio-ash | Wastewater sludge | Heavy metal | Cadmium	NA	wastewaster_sludge
64	1-s2.0-S0013468614022804	TRUE	DOI:10.1016/j.electacta.2014.11.072	https://api.elsevier.com/content/article/pii/S0013468614022804	Electrocatalytic properties of nanomaterials synthesized from Ã¢â‚¬Å“Bromide Anion ExchangeÃ¢â‚¬Â method - Investigations of glucose and glycerol oxidation	Yaovi, Holade	Abstract In this work, different experimental parameters influencing the straightforward nanoparticles synthesis method, so-called Bromide Anion Exchange (BAE) were scrutinized. It was found that a bromide ion to metal(s) molar ratio of 1.5 gave the best electrochemical activity of the obtained catalysts toward the organics oxidation. The revisited BAE synthesis approach allows the preparation of…	Electrochimica Acta	NA	134686	162	NA	2015-04-20	2015-04-20	205	214	10.1016/j.electacta.2014.11.072	0	FALSE	FALSE	NA	Journal	Copyright Ã‚Â© 2014 Elsevier Ltd. All rights reserved.	S0013-4686(14)02280-4	84927929459	2-s2.0-84927929459	In this work, different experimental parameters influencing the straightforward nanoparticles synthesis method, so-called Bromide Anion Exchange (BAE) were scrutinized. It was found that a bromide ion...	NA	Interfacial electrochemistry at atomic, molecular, and nanoscale domains	NA	bromide anion exchange | glucose | glycerol | spectroelectrochemistry | chromatography analysis	NA	glycerol
65	1-s2.0-S001346861731143X	TRUE	DOI:10.1016/j.electacta.2017.05.146	https://api.elsevier.com/content/article/pii/S001346861731143X	Ultrasonic-assisted synthesis of N-doped graphene-supported binary PdAu nanoflowers for enhanced electro-oxidation of ethylene glycol and glycerol	Hui, Xu	Abstract The design of cost-efficient catalysts for the electrooxidation of small organic molecules are highly desirable for the commercial application of direct fuel cells. Shape-controlled PdAu alloys with N-doped graphene support are highly efficient electrocatalysts for the electrooxidation of ethylene glycol and glycerol in the alkaline media. Impressively, the newly generated Pd1Au1-NF/NG c…	Electrochimica Acta	NA	134686	245	NA	2017-08-10	2017-08-10	227	236	10.1016/j.electacta.2017.05.146	0	FALSE	FALSE	NA	Journal	Ã‚Â© 2017 Elsevier Ltd. All rights reserved.	S0013-4686(17)31143-X	85021307183	2-s2.0-85021307183	The design of cost-efficient catalysts for the electrooxidation of small organic molecules are highly desirable for the commercial application of direct fuel cells. Shape-controlled PdAu alloys with...	NA	NA	NA	Ultrasonic | N-doped graphene | PdAu nano-flower | Ethylene glycol and glycerol	NA	glycerol
66	1-s2.0-S001346861731143X	TRUE	DOI:10.1016/j.electacta.2017.05.146	https://api.elsevier.com/content/article/pii/S001346861731143X	Ultrasonic-assisted synthesis of N-doped graphene-supported binary PdAu nanoflowers for enhanced electro-oxidation of ethylene glycol and glycerol	Hui, Xu	Abstract The design of cost-efficient catalysts for the electrooxidation of small organic molecules are highly desirable for the commercial application of direct fuel cells. Shape-controlled PdAu alloys with N-doped graphene support are highly efficient electrocatalysts for the electrooxidation of ethylene glycol and glycerol in the alkaline media. Impressively, the newly generated Pd1Au1-NF/NG c…	Electrochimica Acta	NA	134686	245	NA	2017-08-10	2017-08-10	227	236	10.1016/j.electacta.2017.05.146	0	FALSE	FALSE	NA	Journal	Ã‚Â© 2017 Elsevier Ltd. All rights reserved.	S0013-4686(17)31143-X	85021307183	2-s2.0-85021307183	The design of cost-efficient catalysts for the electrooxidation of small organic molecules are highly desirable for the commercial application of direct fuel cells. Shape-controlled PdAu alloys with...	NA	NA	NA	Ultrasonic | N-doped graphene | PdAu nano-flower | Ethylene glycol and glycerol	NA	ethylene_glycol
67	1-s2.0-S0013935114001601	TRUE	DOI:10.1016/j.envres.2014.04.041	https://api.elsevier.com/content/article/pii/S0013935114001601	Formaldehyde: A chemical of concern in the vicinity of MBT plants of municipal solid waste	Lolita, Vilavert	Abstract The mechanicalÃ¢â‚¬â€œbiological treatment (MBT) of municipal solid waste (MSW) has a number of advantages in comparison to other MSW management possibilities. However, adverse health effects related to this practice are not well known yet, as a varied typology of microbiological and chemical agents may be generated and released. In 2010, we initiated an environmental monitoring program …	Environmental Research	NA	139351	133	NA	2014-08-01	2014-08-01	27	35	10.1016/j.envres.2014.04.041	0	FALSE	FALSE	NA	Journal	Copyright Ã‚Â© 2014 Elsevier Inc. All rights reserved.	S0013-9351(14)00160-1	84901772458	2-s2.0-84901772458	The mechanicalÃ¢â‚¬â€œbiological treatment (MBT) of municipal solid waste (MSW) has a number of advantages in comparison to other MSW management possibilities. However, adverse health effects related to this...	24906065	NA	NA	MechanicalÃ¢â‚¬â€œbiological treatment plant | Volatile organic compounds (VOCs) | Formaldehyde | Bioaerosols | Human health risks	NA	formaldehyde
68	1-s2.0-S0013935114001601	TRUE	DOI:10.1016/j.envres.2014.04.041	https://api.elsevier.com/content/article/pii/S0013935114001601	Formaldehyde: A chemical of concern in the vicinity of MBT plants of municipal solid waste	Lolita, Vilavert	Abstract The mechanicalÃ¢â‚¬â€œbiological treatment (MBT) of municipal solid waste (MSW) has a number of advantages in comparison to other MSW management possibilities. However, adverse health effects related to this practice are not well known yet, as a varied typology of microbiological and chemical agents may be generated and released. In 2010, we initiated an environmental monitoring program …	Environmental Research	NA	139351	133	NA	2014-08-01	2014-08-01	27	35	10.1016/j.envres.2014.04.041	0	FALSE	FALSE	NA	Journal	Copyright Ã‚Â© 2014 Elsevier Inc. All rights reserved.	S0013-9351(14)00160-1	84901772458	2-s2.0-84901772458	The mechanicalÃ¢â‚¬â€œbiological treatment (MBT) of municipal solid waste (MSW) has a number of advantages in comparison to other MSW management possibilities. However, adverse health effects related to this...	24906065	NA	NA	MechanicalÃ¢â‚¬â€œbiological treatment plant | Volatile organic compounds (VOCs) | Formaldehyde | Bioaerosols | Human health risks	NA	organic_housewaste
69	1-s2.0-S0014305716304116	TRUE	DOI:10.1016/j.eurpolymj.2016.10.012	https://api.elsevier.com/content/article/pii/S0014305716304116	Production and characterization of polyurethane foams from a simple mixture of castor oil, crude glycerol and untreated lignin as bio-based polyols	Camila S., CarriÃƒÂ§o	Abstract Polyurethane foams from bio-based polyols have been studied to produce sustainable and eco-friendly materials from biomass industrial wastes. Semi-rigid polyurethane foams were synthesized from physical mixtures of kraft lignin, castor oil and residual glycerol. The influence of different lignin contents (10, 12.5, 15, 17.5, 20, 25, 30 and 40%) on the foam properties was evaluated. An in…	European Polymer Journal	NA	143057	85	NA	2016-12-01	2016-12-01	53	61	10.1016/j.eurpolymj.2016.10.012	0	FALSE	FALSE	NA	Journal	Ã‚Â© 2016 Elsevier Ltd. All rights reserved.	S0014-3057(16)30411-6	84991660321	2-s2.0-84991660321	Polyurethane foams from bio-based polyols have been studied to produce sustainable and eco-friendly materials from biomass industrial wastes. Semi-rigid polyurethane foams were synthesized from physical...	NA	NA	Macromolecular Nanotechnology	Polyurethane foams | Lignin | Crude glycerol | Castor oil	NA	polyurethane_(pu/pur)
70	1-s2.0-S0014305716304116	TRUE	DOI:10.1016/j.eurpolymj.2016.10.012	https://api.elsevier.com/content/article/pii/S0014305716304116	Production and characterization of polyurethane foams from a simple mixture of castor oil, crude glycerol and untreated lignin as bio-based polyols	Camila S., CarriÃƒÂ§o	Abstract Polyurethane foams from bio-based polyols have been studied to produce sustainable and eco-friendly materials from biomass industrial wastes. Semi-rigid polyurethane foams were synthesized from physical mixtures of kraft lignin, castor oil and residual glycerol. The influence of different lignin contents (10, 12.5, 15, 17.5, 20, 25, 30 and 40%) on the foam properties was evaluated. An in…	European Polymer Journal	NA	143057	85	NA	2016-12-01	2016-12-01	53	61	10.1016/j.eurpolymj.2016.10.012	0	FALSE	FALSE	NA	Journal	Ã‚Â© 2016 Elsevier Ltd. All rights reserved.	S0014-3057(16)30411-6	84991660321	2-s2.0-84991660321	Polyurethane foams from bio-based polyols have been studied to produce sustainable and eco-friendly materials from biomass industrial wastes. Semi-rigid polyurethane foams were synthesized from physical...	NA	NA	Macromolecular Nanotechnology	Polyurethane foams | Lignin | Crude glycerol | Castor oil	NA	glycerol
71	1-s2.0-S0014305716304116	TRUE	DOI:10.1016/j.eurpolymj.2016.10.012	https://api.elsevier.com/content/article/pii/S0014305716304116	Production and characterization of polyurethane foams from a simple mixture of castor oil, crude glycerol and untreated lignin as bio-based polyols	Camila S., CarriÃƒÂ§o	Abstract Polyurethane foams from bio-based polyols have been studied to produce sustainable and eco-friendly materials from biomass industrial wastes. Semi-rigid polyurethane foams were synthesized from physical mixtures of kraft lignin, castor oil and residual glycerol. The influence of different lignin contents (10, 12.5, 15, 17.5, 20, 25, 30 and 40%) on the foam properties was evaluated. An in…	European Polymer Journal	NA	143057	85	NA	2016-12-01	2016-12-01	53	61	10.1016/j.eurpolymj.2016.10.012	0	FALSE	FALSE	NA	Journal	Ã‚Â© 2016 Elsevier Ltd. All rights reserved.	S0014-3057(16)30411-6	84991660321	2-s2.0-84991660321	Polyurethane foams from bio-based polyols have been studied to produce sustainable and eco-friendly materials from biomass industrial wastes. Semi-rigid polyurethane foams were synthesized from physical...	NA	NA	Macromolecular Nanotechnology	Polyurethane foams | Lignin | Crude glycerol | Castor oil	NA	glyrcerol
72	1-s2.0-S0014305716313611	TRUE	DOI:10.1016/j.eurpolymj.2017.01.020	https://api.elsevier.com/content/article/pii/S0014305716313611	Thermally reversible and biodegradable polyglycolic-acid-based networks	Sirine, Mhiri	Abstract The furan-maleimide Diels-Alder (DA) reaction was used to synthesize thermally reversible and biodegradable networks based on functionalized polyglycolic acid precursors. Hydroxyl-telechelic polyglycolic acid (PGA) with a well-controlled molar mass was first obtained by ring-opening polymerization (ROP) of glycolide catalyzed by Sn(Oct)2 and using 1,4-butanediol as initiator. Functional …	European Polymer Journal	NA	143057	88	NA	2017-03-01	2017-03-01	292	310	10.1016/j.eurpolymj.2017.01.020	0	FALSE	FALSE	NA	Journal	Ã‚Â© 2017 Elsevier Ltd. All rights reserved.	S0014-3057(16)31361-1	85012239985	2-s2.0-85012239985	The furan-maleimide Diels-Alder (DA) reaction was used to synthesize thermally reversible and biodegradable networks based on functionalized polyglycolic acid precursors. Hydroxyl-telechelic polyglycolic...	NA	NA	NA	Poly(glycolic acid) | Diels-Alder | Thermo-reversibility | Rheology | Biodegradability	NA	butanediols
73	1-s2.0-S0014305716313611	TRUE	DOI:10.1016/j.eurpolymj.2017.01.020	https://api.elsevier.com/content/article/pii/S0014305716313611	Thermally reversible and biodegradable polyglycolic-acid-based networks	Sirine, Mhiri	Abstract The furan-maleimide Diels-Alder (DA) reaction was used to synthesize thermally reversible and biodegradable networks based on functionalized polyglycolic acid precursors. Hydroxyl-telechelic polyglycolic acid (PGA) with a well-controlled molar mass was first obtained by ring-opening polymerization (ROP) of glycolide catalyzed by Sn(Oct)2 and using 1,4-butanediol as initiator. Functional …	European Polymer Journal	NA	143057	88	NA	2017-03-01	2017-03-01	292	310	10.1016/j.eurpolymj.2017.01.020	0	FALSE	FALSE	NA	Journal	Ã‚Â© 2017 Elsevier Ltd. All rights reserved.	S0014-3057(16)31361-1	85012239985	2-s2.0-85012239985	The furan-maleimide Diels-Alder (DA) reaction was used to synthesize thermally reversible and biodegradable networks based on functionalized polyglycolic acid precursors. Hydroxyl-telechelic polyglycolic...	NA	NA	NA	Poly(glycolic acid) | Diels-Alder | Thermo-reversibility | Rheology | Biodegradability	NA	glycerol
74	1-s2.0-S0014305718308206	TRUE	DOI:10.1016/j.eurpolymj.2018.08.020	https://api.elsevier.com/content/article/pii/S0014305718308206	Application of cider by-products for medium chain length polyhydroxyalkanoate production by Pseudomonas putida KT2440	Leire, Urbina	Abstract In this study the technical feasibility of using cider by-products as a substrate for the production of medium chain length polyhydroxyalkanoates (mcl-PHAs) by Pseudomonas putida KT2440 is demonstrated. The untreated apple pomace was found to be composed of two main residual sugars, glucose and fructose, making it a promising cheap growth substrate. A PHA concentration of 1.1Ã¢â‚¬Â¯gÃ¢â‚…	European Polymer Journal	NA	143057	108	NA	2018-11-01	2018-11-01	1	9	10.1016/j.eurpolymj.2018.08.020	0	FALSE	FALSE	NA	Journal	Ã‚Â© 2018 Elsevier Ltd. All rights reserved.	S0014-3057(18)30820-6	85051729113	2-s2.0-85051729113	In this study the technical feasibility of using cider by-products as a substrate for the production of medium chain length polyhydroxyalkanoates (mcl-PHAs) by Pseudomonas putida KT2440 is demonstrated....	NA	NA	NA	Cider by-products | Waste utilization | Pseudomonas putida KT2440 | mcl-PHA | Elastomeric biopolymer	NA	fructose
75	1-s2.0-S0014305718308206	TRUE	DOI:10.1016/j.eurpolymj.2018.08.020	https://api.elsevier.com/content/article/pii/S0014305718308206	Application of cider by-products for medium chain length polyhydroxyalkanoate production by Pseudomonas putida KT2440	Leire, Urbina	Abstract In this study the technical feasibility of using cider by-products as a substrate for the production of medium chain length polyhydroxyalkanoates (mcl-PHAs) by Pseudomonas putida KT2440 is demonstrated. The untreated apple pomace was found to be composed of two main residual sugars, glucose and fructose, making it a promising cheap growth substrate. A PHA concentration of 1.1Ã¢â‚¬Â¯gÃ¢â‚…	European Polymer Journal	NA	143057	108	NA	2018-11-01	2018-11-01	1	9	10.1016/j.eurpolymj.2018.08.020	0	FALSE	FALSE	NA	Journal	Ã‚Â© 2018 Elsevier Ltd. All rights reserved.	S0014-3057(18)30820-6	85051729113	2-s2.0-85051729113	In this study the technical feasibility of using cider by-products as a substrate for the production of medium chain length polyhydroxyalkanoates (mcl-PHAs) by Pseudomonas putida KT2440 is demonstrated....	NA	NA	NA	Cider by-products | Waste utilization | Pseudomonas putida KT2440 | mcl-PHA | Elastomeric biopolymer	NA	apple_pomace
76	1-s2.0-S0014305718308206	TRUE	DOI:10.1016/j.eurpolymj.2018.08.020	https://api.elsevier.com/content/article/pii/S0014305718308206	Application of cider by-products for medium chain length polyhydroxyalkanoate production by Pseudomonas putida KT2440	Leire, Urbina	Abstract In this study the technical feasibility of using cider by-products as a substrate for the production of medium chain length polyhydroxyalkanoates (mcl-PHAs) by Pseudomonas putida KT2440 is demonstrated. The untreated apple pomace was found to be composed of two main residual sugars, glucose and fructose, making it a promising cheap growth substrate. A PHA concentration of 1.1Ã¢â‚¬Â¯gÃ¢â‚…	European Polymer Journal	NA	143057	108	NA	2018-11-01	2018-11-01	1	9	10.1016/j.eurpolymj.2018.08.020	0	FALSE	FALSE	NA	Journal	Ã‚Â© 2018 Elsevier Ltd. All rights reserved.	S0014-3057(18)30820-6	85051729113	2-s2.0-85051729113	In this study the technical feasibility of using cider by-products as a substrate for the production of medium chain length polyhydroxyalkanoates (mcl-PHAs) by Pseudomonas putida KT2440 is demonstrated....	NA	NA	NA	Cider by-products | Waste utilization | Pseudomonas putida KT2440 | mcl-PHA | Elastomeric biopolymer	NA	pharmaceutical
77	1-s2.0-S0014305718308206	TRUE	DOI:10.1016/j.eurpolymj.2018.08.020	https://api.elsevier.com/content/article/pii/S0014305718308206	Application of cider by-products for medium chain length polyhydroxyalkanoate production by Pseudomonas putida KT2440	Leire, Urbina	Abstract In this study the technical feasibility of using cider by-products as a substrate for the production of medium chain length polyhydroxyalkanoates (mcl-PHAs) by Pseudomonas putida KT2440 is demonstrated. The untreated apple pomace was found to be composed of two main residual sugars, glucose and fructose, making it a promising cheap growth substrate. A PHA concentration of 1.1Ã¢â‚¬Â¯gÃ¢â‚…	European Polymer Journal	NA	143057	108	NA	2018-11-01	2018-11-01	1	9	10.1016/j.eurpolymj.2018.08.020	0	FALSE	FALSE	NA	Journal	Ã‚Â© 2018 Elsevier Ltd. All rights reserved.	S0014-3057(18)30820-6	85051729113	2-s2.0-85051729113	In this study the technical feasibility of using cider by-products as a substrate for the production of medium chain length polyhydroxyalkanoates (mcl-PHAs) by Pseudomonas putida KT2440 is demonstrated....	NA	NA	NA	Cider by-products | Waste utilization | Pseudomonas putida KT2440 | mcl-PHA | Elastomeric biopolymer	NA	polyhydroxy_alkanoate_(pha)
78	1-s2.0-S0016236101000217	TRUE	DOI:10.1016/S0016-2361(01)00021-7	https://api.elsevier.com/content/article/pii/S0016236101000217	Production of biocrudes from biomass in a fixed-bed tubular reactor: product yields and compositions	A.E, PÃƒÂ¼tÃƒÂ¼n	Abstract Fixed-bed pyrolysis in a tubular reactor were conducted on three biomass samples, Euphorbia rigida, sunflower (Helianthus annuus L.) pressed bagasse and hazelnut (Corylus avellana) shells, to determine the possibility of each being a potential source of renewable fuels and chemical feedstocks. The effects of pyrolysis temperature and sweep gas (N2) flow rate on the pyrolysis yields and c…	Fuel	NA	162361	80	10	2001-08-01	2001-08-01	1371	1378	10.1016/S0016-2361(01)00021-7	0	FALSE	FALSE	NA	Journal	Copyright Ã‚Â© 2001 Elsevier Science Ltd. All rights reserved.	S0016-2361(01)00021-7	35419459	2-s2.0-0035419459	Fixed-bed pyrolysis in a tubular reactor were conducted on three biomass samples, Euphorbia rigida, sunflower (Helianthus annuus L.) pressed bagasse and hazelnut (Corylus avellana) shells, to determine...	NA	NA	NA	Euphorbia rigida | Sunflower | Hazelnut shells | Biocrude | Pyrolysis	NA	pyrolysis_oil
79	1-s2.0-S0016236101000217	TRUE	DOI:10.1016/S0016-2361(01)00021-7	https://api.elsevier.com/content/article/pii/S0016236101000217	Production of biocrudes from biomass in a fixed-bed tubular reactor: product yields and compositions	A.E, PÃƒÂ¼tÃƒÂ¼n	Abstract Fixed-bed pyrolysis in a tubular reactor were conducted on three biomass samples, Euphorbia rigida, sunflower (Helianthus annuus L.) pressed bagasse and hazelnut (Corylus avellana) shells, to determine the possibility of each being a potential source of renewable fuels and chemical feedstocks. The effects of pyrolysis temperature and sweep gas (N2) flow rate on the pyrolysis yields and c…	Fuel	NA	162361	80	10	2001-08-01	2001-08-01	1371	1378	10.1016/S0016-2361(01)00021-7	0	FALSE	FALSE	NA	Journal	Copyright Ã‚Â© 2001 Elsevier Science Ltd. All rights reserved.	S0016-2361(01)00021-7	35419459	2-s2.0-0035419459	Fixed-bed pyrolysis in a tubular reactor were conducted on three biomass samples, Euphorbia rigida, sunflower (Helianthus annuus L.) pressed bagasse and hazelnut (Corylus avellana) shells, to determine...	NA	NA	NA	Euphorbia rigida | Sunflower | Hazelnut shells | Biocrude | Pyrolysis	NA	sunflower_extraction_meal
80	1-s2.0-S0016236103000073	TRUE	DOI:10.1016/S0016-2361(03)00007-3	https://api.elsevier.com/content/article/pii/S0016236103000073	Co-firing of coal and cattle feedlot biomass (FB) fuels. Part I. Feedlot biomass (cattle manure) fuel quality and characteristicsÃ¢Ëœâ€	John M., Sweeten	Abstract The use of cattle manure (referred to as feedlot biomass, FB) as a fuel source has the potential to solve both waste disposal problems and reduce fossil fuel based CO2 emissions. Previous attempts to utilize animal waste as a sole fuel source have met with only limited success due to the higher ash, higher moisture, and inconsistent properties of FB. Thus, a co-firing technology is propo…	Fuel	NA	162361	82	10	2003-07-01	2003-07-01	1167	1182	10.1016/S0016-2361(03)00007-3	0	FALSE	FALSE	NA	Journal	Copyright Ã‚Â© 2003 Elsevier Science Ltd. All rights reserved.	S0016-2361(03)00007-3	37411357	2-s2.0-0037411357	The use of cattle manure (referred to as feedlot biomass, FB) as a fuel source has the potential to solve both waste disposal problems and reduce fossil fuel based CO2 emissions. Previous attempts to...	NA	NA	NA	Feedlot biomass | cattle manure, compost | Higher heating value	NA	dedicated_combustion_/_incineration
81	1-s2.0-S0016236103000073	TRUE	DOI:10.1016/S0016-2361(03)00007-3	https://api.elsevier.com/content/article/pii/S0016236103000073	Co-firing of coal and cattle feedlot biomass (FB) fuels. Part I. Feedlot biomass (cattle manure) fuel quality and characteristicsÃ¢Ëœâ€	John M., Sweeten	Abstract The use of cattle manure (referred to as feedlot biomass, FB) as a fuel source has the potential to solve both waste disposal problems and reduce fossil fuel based CO2 emissions. Previous attempts to utilize animal waste as a sole fuel source have met with only limited success due to the higher ash, higher moisture, and inconsistent properties of FB. Thus, a co-firing technology is propo…	Fuel	NA	162361	82	10	2003-07-01	2003-07-01	1167	1182	10.1016/S0016-2361(03)00007-3	0	FALSE	FALSE	NA	Journal	Copyright Ã‚Â© 2003 Elsevier Science Ltd. All rights reserved.	S0016-2361(03)00007-3	37411357	2-s2.0-0037411357	The use of cattle manure (referred to as feedlot biomass, FB) as a fuel source has the potential to solve both waste disposal problems and reduce fossil fuel based CO2 emissions. Previous attempts to...	NA	NA	NA	Feedlot biomass | cattle manure, compost | Higher heating value	NA	cattle_manure
82	1-s2.0-S0016236103000073	TRUE	DOI:10.1016/S0016-2361(03)00007-3	https://api.elsevier.com/content/article/pii/S0016236103000073	Co-firing of coal and cattle feedlot biomass (FB) fuels. Part I. Feedlot biomass (cattle manure) fuel quality and characteristicsÃ¢Ëœâ€	John M., Sweeten	Abstract The use of cattle manure (referred to as feedlot biomass, FB) as a fuel source has the potential to solve both waste disposal problems and reduce fossil fuel based CO2 emissions. Previous attempts to utilize animal waste as a sole fuel source have met with only limited success due to the higher ash, higher moisture, and inconsistent properties of FB. Thus, a co-firing technology is propo…	Fuel	NA	162361	82	10	2003-07-01	2003-07-01	1167	1182	10.1016/S0016-2361(03)00007-3	0	FALSE	FALSE	NA	Journal	Copyright Ã‚Â© 2003 Elsevier Science Ltd. All rights reserved.	S0016-2361(03)00007-3	37411357	2-s2.0-0037411357	The use of cattle manure (referred to as feedlot biomass, FB) as a fuel source has the potential to solve both waste disposal problems and reduce fossil fuel based CO2 emissions. Previous attempts to...	NA	NA	NA	Feedlot biomass | cattle manure, compost | Higher heating value	NA	compost
83	1-s2.0-S0016236103000085	TRUE	DOI:10.1016/S0016-2361(03)00008-5	https://api.elsevier.com/content/article/pii/S0016236103000085	Co-firing of coal and cattle feedlot biomass (FB) fuels. Part II. Performance results from 30kWt (100,000) BTU/h laboratory scale boiler burnerÃ¢Ëœâ€	K., Annamalai	Abstract The use of cattle manure (referred to as feedlot biomass, FB) as a fuel source has the potential to both solve waste disposal problems and reduce fossil fuel based CO2 emissions. A co-firing technology is proposed where FB is ground, mixed with coal, and then fired in existing, pulverized coal-fired boiler burner facilities. A research program was undertaken in order to determine (i) fue…	Fuel	NA	162361	82	10	2003-07-01	2003-07-01	1183	1193	10.1016/S0016-2361(03)00008-5	0	FALSE	FALSE	NA	Journal	Copyright Ã‚Â© 2003 Elsevier Science Ltd. All rights reserved.	S0016-2361(03)00008-5	37411368	2-s2.0-0037411368	The use of cattle manure (referred to as feedlot biomass, FB) as a fuel source has the potential to both solve waste disposal problems and reduce fossil fuel based CO2 emissions. A co-firing technology...	NA	NA	NA	Feedlot biomass | Cattle manure emissions | Boiler burner	NA	cattle_manure
84	1-s2.0-S0016236103000085	TRUE	DOI:10.1016/S0016-2361(03)00008-5	https://api.elsevier.com/content/article/pii/S0016236103000085	Co-firing of coal and cattle feedlot biomass (FB) fuels. Part II. Performance results from 30kWt (100,000) BTU/h laboratory scale boiler burnerÃ¢Ëœâ€	K., Annamalai	Abstract The use of cattle manure (referred to as feedlot biomass, FB) as a fuel source has the potential to both solve waste disposal problems and reduce fossil fuel based CO2 emissions. A co-firing technology is proposed where FB is ground, mixed with coal, and then fired in existing, pulverized coal-fired boiler burner facilities. A research program was undertaken in order to determine (i) fue…	Fuel	NA	162361	82	10	2003-07-01	2003-07-01	1183	1193	10.1016/S0016-2361(03)00008-5	0	FALSE	FALSE	NA	Journal	Copyright Ã‚Â© 2003 Elsevier Science Ltd. All rights reserved.	S0016-2361(03)00008-5	37411368	2-s2.0-0037411368	The use of cattle manure (referred to as feedlot biomass, FB) as a fuel source has the potential to both solve waste disposal problems and reduce fossil fuel based CO2 emissions. A co-firing technology...	NA	NA	NA	Feedlot biomass | Cattle manure emissions | Boiler burner	NA	compost
85	1-s2.0-S0016236103000085	TRUE	DOI:10.1016/S0016-2361(03)00008-5	https://api.elsevier.com/content/article/pii/S0016236103000085	Co-firing of coal and cattle feedlot biomass (FB) fuels. Part II. Performance results from 30kWt (100,000) BTU/h laboratory scale boiler burnerÃ¢Ëœâ€	K., Annamalai	Abstract The use of cattle manure (referred to as feedlot biomass, FB) as a fuel source has the potential to both solve waste disposal problems and reduce fossil fuel based CO2 emissions. A co-firing technology is proposed where FB is ground, mixed with coal, and then fired in existing, pulverized coal-fired boiler burner facilities. A research program was undertaken in order to determine (i) fue…	Fuel	NA	162361	82	10	2003-07-01	2003-07-01	1183	1193	10.1016/S0016-2361(03)00008-5	0	FALSE	FALSE	NA	Journal	Copyright Ã‚Â© 2003 Elsevier Science Ltd. All rights reserved.	S0016-2361(03)00008-5	37411368	2-s2.0-0037411368	The use of cattle manure (referred to as feedlot biomass, FB) as a fuel source has the potential to both solve waste disposal problems and reduce fossil fuel based CO2 emissions. A co-firing technology...	NA	NA	NA	Feedlot biomass | Cattle manure emissions | Boiler burner	NA	dedicated_combustion_/_incineration
86	1-s2.0-S0016236104003680	TRUE	DOI:10.1016/j.fuel.2004.11.024	https://api.elsevier.com/content/article/pii/S0016236104003680	Low-temperature pyrolysis of sewage sludge and putrescible garbage for fuel oil production	Lilly, Shen	Abstract Low-temperature pyrolysis of putrescible garbage (PG) and mixtures of PG with sewage sludge (SS) was investigated with the aim to study the mechanisms and product distribution and to identify optimum process conditions for maximising the fuel oil yield. Experiments were performed in two rotary kiln type reactors in series, where the reaction temperature between 400 and 550Ã‚Â°C and solid…	Fuel	NA	162361	84	7	2005-05-01	2005-05-01	809	815	10.1016/j.fuel.2004.11.024	0	FALSE	FALSE	NA	Journal	Copyright Ã‚Â© 2004 Elsevier Ltd. All rights reserved.	S0016-2361(04)00368-0	13944283385	2-s2.0-13944283385	Low-temperature pyrolysis of putrescible garbage (PG) and mixtures of PG with sewage sludge (SS) was investigated with the aim to study the mechanisms and product distribution and to identify optimum...	NA	NA	NA	Municipal solid waste | Putrescible garbage | Pyrolysis | Sewage sludge | Waste utilisation	NA	organic_housewaste
87	1-s2.0-S0016236104003680	TRUE	DOI:10.1016/j.fuel.2004.11.024	https://api.elsevier.com/content/article/pii/S0016236104003680	Low-temperature pyrolysis of sewage sludge and putrescible garbage for fuel oil production	Lilly, Shen	Abstract Low-temperature pyrolysis of putrescible garbage (PG) and mixtures of PG with sewage sludge (SS) was investigated with the aim to study the mechanisms and product distribution and to identify optimum process conditions for maximising the fuel oil yield. Experiments were performed in two rotary kiln type reactors in series, where the reaction temperature between 400 and 550Ã‚Â°C and solid…	Fuel	NA	162361	84	7	2005-05-01	2005-05-01	809	815	10.1016/j.fuel.2004.11.024	0	FALSE	FALSE	NA	Journal	Copyright Ã‚Â© 2004 Elsevier Ltd. All rights reserved.	S0016-2361(04)00368-0	13944283385	2-s2.0-13944283385	Low-temperature pyrolysis of putrescible garbage (PG) and mixtures of PG with sewage sludge (SS) was investigated with the aim to study the mechanisms and product distribution and to identify optimum...	NA	NA	NA	Municipal solid waste | Putrescible garbage | Pyrolysis | Sewage sludge | Waste utilisation	NA	dedicated_combustion_/_incineration
88	1-s2.0-S0016236107002761	TRUE	DOI:10.1016/j.fuel.2007.05.041	https://api.elsevier.com/content/article/pii/S0016236107002761	Torrefaction of reed canary grass, wheat straw and willow to enhance solid fuel qualities and combustion properties	T.G., Bridgeman	Abstract Torrefaction is a treatment which serves to improve the properties of biomass in relation to thermochemical processing techniques for energy generation; for example, combustion, co-combustion with coal or gasification. The topic has gathered interest in the past two decades but further understanding is required for optimisation of the process thus enhancing economic efficiency, which is …	Fuel	NA	162361	87	6	2008-05-01	2008-05-01	844	856	10.1016/j.fuel.2007.05.041	0	FALSE	FALSE	NA	Journal	Copyright Ã‚Â© 2007 Elsevier Ltd. All rights reserved.	S0016-2361(07)00276-1	38849099635	2-s2.0-38849099635	Torrefaction is a treatment which serves to improve the properties of biomass in relation to thermochemical processing techniques for energy generation; for example, combustion, co-combustion with coal...	NA	NA	NA	Torrefaction | Biomass | Reed canary grass | Pre-treatment | Combustion properties	NA	dedicated_combustion_/_incineration
89	1-s2.0-S0016236107002761	TRUE	DOI:10.1016/j.fuel.2007.05.041	https://api.elsevier.com/content/article/pii/S0016236107002761	Torrefaction of reed canary grass, wheat straw and willow to enhance solid fuel qualities and combustion properties	T.G., Bridgeman	Abstract Torrefaction is a treatment which serves to improve the properties of biomass in relation to thermochemical processing techniques for energy generation; for example, combustion, co-combustion with coal or gasification. The topic has gathered interest in the past two decades but further understanding is required for optimisation of the process thus enhancing economic efficiency, which is …	Fuel	NA	162361	87	6	2008-05-01	2008-05-01	844	856	10.1016/j.fuel.2007.05.041	0	FALSE	FALSE	NA	Journal	Copyright Ã‚Â© 2007 Elsevier Ltd. All rights reserved.	S0016-2361(07)00276-1	38849099635	2-s2.0-38849099635	Torrefaction is a treatment which serves to improve the properties of biomass in relation to thermochemical processing techniques for energy generation; for example, combustion, co-combustion with coal...	NA	NA	NA	Torrefaction | Biomass | Reed canary grass | Pre-treatment | Combustion properties	NA	torrefaction
90	1-s2.0-S0016236107002761	TRUE	DOI:10.1016/j.fuel.2007.05.041	https://api.elsevier.com/content/article/pii/S0016236107002761	Torrefaction of reed canary grass, wheat straw and willow to enhance solid fuel qualities and combustion properties	T.G., Bridgeman	Abstract Torrefaction is a treatment which serves to improve the properties of biomass in relation to thermochemical processing techniques for energy generation; for example, combustion, co-combustion with coal or gasification. The topic has gathered interest in the past two decades but further understanding is required for optimisation of the process thus enhancing economic efficiency, which is …	Fuel	NA	162361	87	6	2008-05-01	2008-05-01	844	856	10.1016/j.fuel.2007.05.041	0	FALSE	FALSE	NA	Journal	Copyright Ã‚Â© 2007 Elsevier Ltd. All rights reserved.	S0016-2361(07)00276-1	38849099635	2-s2.0-38849099635	Torrefaction is a treatment which serves to improve the properties of biomass in relation to thermochemical processing techniques for energy generation; for example, combustion, co-combustion with coal...	NA	NA	NA	Torrefaction | Biomass | Reed canary grass | Pre-treatment | Combustion properties	NA	wheat_straw
91	1-s2.0-S0016236108001737	TRUE	DOI:10.1016/j.fuel.2008.04.024	https://api.elsevier.com/content/article/pii/S0016236108001737	Hydrogen production from glycerol by reforming in supercritical water over Ru/Al2O3 catalyst	Adam J., Byrd	Abstract Supercritical water is a promising medium for the reforming of hydrocarbons and alcohols for the production of hydrogen at high pressures in a short reaction time. Water serves both as a dense solvent as well as a reactant. In this work, hydrogen is produced from glycerol by supercritical water reforming over a Ru/Al2O3 catalyst with low methane and carbon monoxide formation. Experiments…	Fuel	NA	162361	87	13	2008-10-01	2008-10-01	2956	2960	10.1016/j.fuel.2008.04.024	0	FALSE	FALSE	NA	Journal	Copyright Ã‚Â© 2008 Elsevier Ltd. All rights reserved.	S0016-2361(08)00173-7	45949110822	2-s2.0-45949110822	Supercritical water is a promising medium for the reforming of hydrocarbons and alcohols for the production of hydrogen at high pressures in a short reaction time. Water serves both as a dense solvent...	NA	NA	NA	Hydrogen | Supercritical water | Glycerol | Biomass | Biodiesel	NA	glycerol
92	1-s2.0-S0016236109003123	TRUE	DOI:10.1016/j.fuel.2009.06.033	https://api.elsevier.com/content/article/pii/S0016236109003123	Hydrothermal reforming of bio-diesel plant waste: Products distribution and characterization	Jude A., Onwudili	Abstract A viscous waste derived from a bio-diesel production plant, in the form of crude glycerol, was reacted under subcritical and supercritical water conditions and the product composition determined in relation to process conditions. Preliminary analysis of the original sample showed that the main constituent organic compounds were methanol (20.8wt.%), glycerol (42.3wt.%) and fatty acid meth…	Fuel	NA	162361	89	2	2010-02-01	2010-02-01	501	509	10.1016/j.fuel.2009.06.033	0	FALSE	FALSE	NA	Journal	Copyright Ã‚Â© 2009 Elsevier Ltd. All rights reserved.	S0016-2361(09)00312-3	71549140971	2-s2.0-71549140971	A viscous waste derived from a bio-diesel production plant, in the form of crude glycerol, was reacted under subcritical and supercritical water conditions and the product composition determined in...	NA	NA	NA	Waste | Supercritical water | Bio-diesel | Glycerol, gasification	NA	methanol
93	1-s2.0-S0016236109003123	TRUE	DOI:10.1016/j.fuel.2009.06.033	https://api.elsevier.com/content/article/pii/S0016236109003123	Hydrothermal reforming of bio-diesel plant waste: Products distribution and characterization	Jude A., Onwudili	Abstract A viscous waste derived from a bio-diesel production plant, in the form of crude glycerol, was reacted under subcritical and supercritical water conditions and the product composition determined in relation to process conditions. Preliminary analysis of the original sample showed that the main constituent organic compounds were methanol (20.8wt.%), glycerol (42.3wt.%) and fatty acid meth…	Fuel	NA	162361	89	2	2010-02-01	2010-02-01	501	509	10.1016/j.fuel.2009.06.033	0	FALSE	FALSE	NA	Journal	Copyright Ã‚Â© 2009 Elsevier Ltd. All rights reserved.	S0016-2361(09)00312-3	71549140971	2-s2.0-71549140971	A viscous waste derived from a bio-diesel production plant, in the form of crude glycerol, was reacted under subcritical and supercritical water conditions and the product composition determined in...	NA	NA	NA	Waste | Supercritical water | Bio-diesel | Glycerol, gasification	NA	glycerol
94	1-s2.0-S0016236110000025	TRUE	DOI:10.1016/j.fuel.2010.01.001	https://api.elsevier.com/content/article/pii/S0016236110000025	Techno-economic comparison of process technologies for biochemical ethanol production from corn stover	Feroz Kabir, Kazi	Abstract This techno-economic study compares several process technologies for the production of ethanol from lignocellulosic material, based on a 5- to 8-year time frame for implementation. While several previous techno-economic studies have focused on future technology benchmarks, this study examines the short-term commercial viability of biochemical ethanol production. With that goal, yields (w…	Fuel	NA	162361	89	NA	2010-11-01	2010-11-01	S20	S28	10.1016/j.fuel.2010.01.001	0	FALSE	FALSE	NA	Journal	Copyright Ã‚Â© 2010 Elsevier Ltd. Published by Elsevier Ltd. All rights reserved.	S0016-2361(10)00002-5	77957373424	2-s2.0-77957373424	This techno-economic study compares several process technologies for the production of ethanol from lignocellulosic material, based on a 5- to 8-year time frame for implementation. While several previous...	NA	Techno-economic Comparison of Biomass-to-Biofuels Pathways	NA	Techno-economics | Ethanol | Biomass | Pretreatment | Pioneer plant	NA	maize_stover
95	1-s2.0-S0016236110000025	TRUE	DOI:10.1016/j.fuel.2010.01.001	https://api.elsevier.com/content/article/pii/S0016236110000025	Techno-economic comparison of process technologies for biochemical ethanol production from corn stover	Feroz Kabir, Kazi	Abstract This techno-economic study compares several process technologies for the production of ethanol from lignocellulosic material, based on a 5- to 8-year time frame for implementation. While several previous techno-economic studies have focused on future technology benchmarks, this study examines the short-term commercial viability of biochemical ethanol production. With that goal, yields (w…	Fuel	NA	162361	89	NA	2010-11-01	2010-11-01	S20	S28	10.1016/j.fuel.2010.01.001	0	FALSE	FALSE	NA	Journal	Copyright Ã‚Â© 2010 Elsevier Ltd. Published by Elsevier Ltd. All rights reserved.	S0016-2361(10)00002-5	77957373424	2-s2.0-77957373424	This techno-economic study compares several process technologies for the production of ethanol from lignocellulosic material, based on a 5- to 8-year time frame for implementation. While several previous...	NA	Techno-economic Comparison of Biomass-to-Biofuels Pathways	NA	Techno-economics | Ethanol | Biomass | Pretreatment | Pioneer plant	NA	biogasoline
96	1-s2.0-S0016236110000025	TRUE	DOI:10.1016/j.fuel.2010.01.001	https://api.elsevier.com/content/article/pii/S0016236110000025	Techno-economic comparison of process technologies for biochemical ethanol production from corn stover	Feroz Kabir, Kazi	Abstract This techno-economic study compares several process technologies for the production of ethanol from lignocellulosic material, based on a 5- to 8-year time frame for implementation. While several previous techno-economic studies have focused on future technology benchmarks, this study examines the short-term commercial viability of biochemical ethanol production. With that goal, yields (w…	Fuel	NA	162361	89	NA	2010-11-01	2010-11-01	S20	S28	10.1016/j.fuel.2010.01.001	0	FALSE	FALSE	NA	Journal	Copyright Ã‚Â© 2010 Elsevier Ltd. Published by Elsevier Ltd. All rights reserved.	S0016-2361(10)00002-5	77957373424	2-s2.0-77957373424	This techno-economic study compares several process technologies for the production of ethanol from lignocellulosic material, based on a 5- to 8-year time frame for implementation. While several previous...	NA	Techno-economic Comparison of Biomass-to-Biofuels Pathways	NA	Techno-economics | Ethanol | Biomass | Pretreatment | Pioneer plant	NA	ethanol_/_bioethanol
97	1-s2.0-S0016236110003625	TRUE	DOI:10.1016/j.fuel.2010.07.015	https://api.elsevier.com/content/article/pii/S0016236110003625	Techno-economic comparison of biomass-to-transportation fuels via pyrolysis, gasification, and biochemical pathways	Robert P., Anex	Abstract This analysis compares capital and operating cost for six near-term biomass-to-liquid fuels technology scenarios representing three conversion platforms: pyrolysis, gasification, and biochemical. These analyses employed similar assumptions to allow comparisons among the results. Most prominently, the feedstock is assumed to be corn stover and plant capacity was 2000tonne/day for each pla…	Fuel	NA	162361	89	NA	2010-11-01	2010-11-01	S29	S35	10.1016/j.fuel.2010.07.015	0	FALSE	FALSE	NA	Journal	Copyright Ã‚Â© 2010 Elsevier Ltd. Published by Elsevier Ltd. All rights reserved.	S0016-2361(10)00362-5	77957575145	2-s2.0-77957575145	This analysis compares capital and operating cost for six near-term biomass-to-liquid fuels technology scenarios representing three conversion platforms: pyrolysis, gasification, and biochemical. These...	NA	Techno-economic Comparison of Biomass-to-Biofuels Pathways	NA	Techno-economics | Biomass | Pyrolysis | Gasification | Biochemical	NA	maize_stover
98	1-s2.0-S0016236110003625	TRUE	DOI:10.1016/j.fuel.2010.07.015	https://api.elsevier.com/content/article/pii/S0016236110003625	Techno-economic comparison of biomass-to-transportation fuels via pyrolysis, gasification, and biochemical pathways	Robert P., Anex	Abstract This analysis compares capital and operating cost for six near-term biomass-to-liquid fuels technology scenarios representing three conversion platforms: pyrolysis, gasification, and biochemical. These analyses employed similar assumptions to allow comparisons among the results. Most prominently, the feedstock is assumed to be corn stover and plant capacity was 2000tonne/day for each pla…	Fuel	NA	162361	89	NA	2010-11-01	2010-11-01	S29	S35	10.1016/j.fuel.2010.07.015	0	FALSE	FALSE	NA	Journal	Copyright Ã‚Â© 2010 Elsevier Ltd. Published by Elsevier Ltd. All rights reserved.	S0016-2361(10)00362-5	77957575145	2-s2.0-77957575145	This analysis compares capital and operating cost for six near-term biomass-to-liquid fuels technology scenarios representing three conversion platforms: pyrolysis, gasification, and biochemical. These...	NA	Techno-economic Comparison of Biomass-to-Biofuels Pathways	NA	Techno-economics | Biomass | Pyrolysis | Gasification | Biochemical	NA	biogasoline
99	1-s2.0-S0016236110003741	TRUE	DOI:10.1016/j.fuel.2010.07.027	https://api.elsevier.com/content/article/pii/S0016236110003741	Techno-economic analysis of biomass-to-liquids production based on gasification	Ryan M., Swanson	Abstract This study compares capital and production costs of two biomass-to-liquid production plants based on gasification utilizing 2000 dry Mg per day of corn stover. The focus is to produce liquid transportation fuels with electricity as co-product using commercially available technology within the next 5Ã¢â‚¬â€œ8years. The first biorefinery scenario is a low temperature (870Ã‚Â°C, 1598Ã‚Â°F),…	Fuel	NA	162361	89	NA	2010-11-01	2010-11-01	S11	S19	10.1016/j.fuel.2010.07.027	0	FALSE	FALSE	NA	Journal	Copyright Ã‚Â© 2010 Elsevier Ltd. All rights reserved.	S0016-2361(10)00374-1	77957557694	2-s2.0-77957557694	This study compares capital and production costs of two biomass-to-liquid production plants based on gasification utilizing 2000 dry Mg per day of corn stover. The focus is to produce liquid transportation...	NA	Techno-economic Comparison of Biomass-to-Biofuels Pathways	NA	Biofuel | Gasification | Biomass | FischerÃ¢â‚¬â€œTropsch | Techno-economics	NA	biogasoline
100	1-s2.0-S0016236110003741	TRUE	DOI:10.1016/j.fuel.2010.07.027	https://api.elsevier.com/content/article/pii/S0016236110003741	Techno-economic analysis of biomass-to-liquids production based on gasification	Ryan M., Swanson	Abstract This study compares capital and production costs of two biomass-to-liquid production plants based on gasification utilizing 2000 dry Mg per day of corn stover. The focus is to produce liquid transportation fuels with electricity as co-product using commercially available technology within the next 5Ã¢â‚¬â€œ8years. The first biorefinery scenario is a low temperature (870Ã‚Â°C, 1598Ã‚Â°F),…	Fuel	NA	162361	89	NA	2010-11-01	2010-11-01	S11	S19	10.1016/j.fuel.2010.07.027	0	FALSE	FALSE	NA	Journal	Copyright Ã‚Â© 2010 Elsevier Ltd. All rights reserved.	S0016-2361(10)00374-1	77957557694	2-s2.0-77957557694	This study compares capital and production costs of two biomass-to-liquid production plants based on gasification utilizing 2000 dry Mg per day of corn stover. The focus is to produce liquid transportation...	NA	Techno-economic Comparison of Biomass-to-Biofuels Pathways	NA	Biofuel | Gasification | Biomass | FischerÃ¢â‚¬â€œTropsch | Techno-economics	NA	maize_stover
101	1-s2.0-S0016236110003765	TRUE	DOI:10.1016/j.fuel.2010.07.029	https://api.elsevier.com/content/article/pii/S0016236110003765	Techno-economic analysis of biomass fast pyrolysis to transportation fuels	Mark M., Wright	Abstract This techno-economic study examines fast pyrolysis of corn stover to bio-oil with subsequent upgrading of the bio-oil to naphtha and diesel range fuels. Two 2000 dry tonne per day scenarios are developed: the first scenario separates a fraction of the bio-oil to generate hydrogen on-site for fuel upgrading, while the second scenario relies on merchant hydrogen.The modeling effort resulte…	Fuel	NA	162361	89	NA	2010-11-01	2010-11-01	S2	S10	10.1016/j.fuel.2010.07.029	0	FALSE	FALSE	NA	Journal	Copyright Ã‚Â© 2010 Elsevier Ltd. All rights reserved.	S0016-2361(10)00376-5	77957603444	2-s2.0-77957603444	This techno-economic study examines fast pyrolysis of corn stover to bio-oil with subsequent upgrading of the bio-oil to naphtha and diesel range fuels. Two 2000 dry tonne per day scenarios are developed:...	NA	Techno-economic Comparison of Biomass-to-Biofuels Pathways	NA	Pyrolysis | Techno-economics | Biomass to fuels | Bio-oil upgrading	NA	maize_stover
102	1-s2.0-S0016236110003765	TRUE	DOI:10.1016/j.fuel.2010.07.029	https://api.elsevier.com/content/article/pii/S0016236110003765	Techno-economic analysis of biomass fast pyrolysis to transportation fuels	Mark M., Wright	Abstract This techno-economic study examines fast pyrolysis of corn stover to bio-oil with subsequent upgrading of the bio-oil to naphtha and diesel range fuels. Two 2000 dry tonne per day scenarios are developed: the first scenario separates a fraction of the bio-oil to generate hydrogen on-site for fuel upgrading, while the second scenario relies on merchant hydrogen.The modeling effort resulte…	Fuel	NA	162361	89	NA	2010-11-01	2010-11-01	S2	S10	10.1016/j.fuel.2010.07.029	0	FALSE	FALSE	NA	Journal	Copyright Ã‚Â© 2010 Elsevier Ltd. All rights reserved.	S0016-2361(10)00376-5	77957603444	2-s2.0-77957603444	This techno-economic study examines fast pyrolysis of corn stover to bio-oil with subsequent upgrading of the bio-oil to naphtha and diesel range fuels. Two 2000 dry tonne per day scenarios are developed:...	NA	Techno-economic Comparison of Biomass-to-Biofuels Pathways	NA	Pyrolysis | Techno-economics | Biomass to fuels | Bio-oil upgrading	NA	biogasoline
103	1-s2.0-S0016236110006307	TRUE	DOI:10.1016/j.fuel.2010.11.016	https://api.elsevier.com/content/article/pii/S0016236110006307	From organic waste to biodiesel: Black soldier fly, Hermetiaillucens, makes it feasible	Qing, Li	Abstract Biodiesel is a renewable and environmentally friendly liquid fuel. However, the feedstock, predominantly crop oil, is a limited and expensive food resource which prevents large scale application of biodiesel. Development of non-food feedstocks are therefore, needed to fully utilize biodieselÃ¢â‚¬â„¢s potential. In this study, the larvae of a high fat containing insect, black soldier fly …	Fuel	NA	162361	90	4	2011-04-01	2011-04-01	1545	1548	10.1016/j.fuel.2010.11.016	0	FALSE	FALSE	NA	Journal	Copyright Ã‚Â© 2010 Elsevier Ltd. All rights reserved.	S0016-2361(10)00630-7	80053330013	2-s2.0-80053330013	Biodiesel is a renewable and environmentally friendly liquid fuel. However, the feedstock, predominantly crop oil, is a limited and expensive food resource which prevents large scale application of...	NA	NA	NA	Biodiesel | Biofuel | Black soldier fly | Feedstock | Organic waste management	NA	cattle_manure
104	1-s2.0-S0016236110006307	TRUE	DOI:10.1016/j.fuel.2010.11.016	https://api.elsevier.com/content/article/pii/S0016236110006307	From organic waste to biodiesel: Black soldier fly, Hermetiaillucens, makes it feasible	Qing, Li	Abstract Biodiesel is a renewable and environmentally friendly liquid fuel. However, the feedstock, predominantly crop oil, is a limited and expensive food resource which prevents large scale application of biodiesel. Development of non-food feedstocks are therefore, needed to fully utilize biodieselÃ¢â‚¬â„¢s potential. In this study, the larvae of a high fat containing insect, black soldier fly …	Fuel	NA	162361	90	4	2011-04-01	2011-04-01	1545	1548	10.1016/j.fuel.2010.11.016	0	FALSE	FALSE	NA	Journal	Copyright Ã‚Â© 2010 Elsevier Ltd. All rights reserved.	S0016-2361(10)00630-7	80053330013	2-s2.0-80053330013	Biodiesel is a renewable and environmentally friendly liquid fuel. However, the feedstock, predominantly crop oil, is a limited and expensive food resource which prevents large scale application of...	NA	NA	NA	Biodiesel | Biofuel | Black soldier fly | Feedstock | Organic waste management	NA	pig_manure
105	1-s2.0-S0016236110006307	TRUE	DOI:10.1016/j.fuel.2010.11.016	https://api.elsevier.com/content/article/pii/S0016236110006307	From organic waste to biodiesel: Black soldier fly, Hermetiaillucens, makes it feasible	Qing, Li	Abstract Biodiesel is a renewable and environmentally friendly liquid fuel. However, the feedstock, predominantly crop oil, is a limited and expensive food resource which prevents large scale application of biodiesel. Development of non-food feedstocks are therefore, needed to fully utilize biodieselÃ¢â‚¬â„¢s potential. In this study, the larvae of a high fat containing insect, black soldier fly …	Fuel	NA	162361	90	4	2011-04-01	2011-04-01	1545	1548	10.1016/j.fuel.2010.11.016	0	FALSE	FALSE	NA	Journal	Copyright Ã‚Â© 2010 Elsevier Ltd. All rights reserved.	S0016-2361(10)00630-7	80053330013	2-s2.0-80053330013	Biodiesel is a renewable and environmentally friendly liquid fuel. However, the feedstock, predominantly crop oil, is a limited and expensive food resource which prevents large scale application of...	NA	NA	NA	Biodiesel | Biofuel | Black soldier fly | Feedstock | Organic waste management	NA	biodiesel
106	1-s2.0-S0016236110006307	TRUE	DOI:10.1016/j.fuel.2010.11.016	https://api.elsevier.com/content/article/pii/S0016236110006307	From organic waste to biodiesel: Black soldier fly, Hermetiaillucens, makes it feasible	Qing, Li	Abstract Biodiesel is a renewable and environmentally friendly liquid fuel. However, the feedstock, predominantly crop oil, is a limited and expensive food resource which prevents large scale application of biodiesel. Development of non-food feedstocks are therefore, needed to fully utilize biodieselÃ¢â‚¬â„¢s potential. In this study, the larvae of a high fat containing insect, black soldier fly …	Fuel	NA	162361	90	4	2011-04-01	2011-04-01	1545	1548	10.1016/j.fuel.2010.11.016	0	FALSE	FALSE	NA	Journal	Copyright Ã‚Â© 2010 Elsevier Ltd. All rights reserved.	S0016-2361(10)00630-7	80053330013	2-s2.0-80053330013	Biodiesel is a renewable and environmentally friendly liquid fuel. However, the feedstock, predominantly crop oil, is a limited and expensive food resource which prevents large scale application of...	NA	NA	NA	Biodiesel | Biofuel | Black soldier fly | Feedstock | Organic waste management	NA	poultry_manure
107	1-s2.0-S0016236110006307	TRUE	DOI:10.1016/j.fuel.2010.11.016	https://api.elsevier.com/content/article/pii/S0016236110006307	From organic waste to biodiesel: Black soldier fly, Hermetiaillucens, makes it feasible	Qing, Li	Abstract Biodiesel is a renewable and environmentally friendly liquid fuel. However, the feedstock, predominantly crop oil, is a limited and expensive food resource which prevents large scale application of biodiesel. Development of non-food feedstocks are therefore, needed to fully utilize biodieselÃ¢â‚¬â„¢s potential. In this study, the larvae of a high fat containing insect, black soldier fly …	Fuel	NA	162361	90	4	2011-04-01	2011-04-01	1545	1548	10.1016/j.fuel.2010.11.016	0	FALSE	FALSE	NA	Journal	Copyright Ã‚Â© 2010 Elsevier Ltd. All rights reserved.	S0016-2361(10)00630-7	80053330013	2-s2.0-80053330013	Biodiesel is a renewable and environmentally friendly liquid fuel. However, the feedstock, predominantly crop oil, is a limited and expensive food resource which prevents large scale application of...	NA	NA	NA	Biodiesel | Biofuel | Black soldier fly | Feedstock | Organic waste management	NA	methyl_esters
108	1-s2.0-S0016236111003085	TRUE	DOI:10.1016/j.fuel.2011.06.003	https://api.elsevier.com/content/article/pii/S0016236111003085	Gasification of pelletized renewable fuel for clean energy production	A., Lickrastina	Abstract The main aim of the study was to develop and investigate a small-scale experimental gasification technique for the effective thermal decomposition of pelletized renewable fuels (wood sawdust, wheat straw). The technical solution of the biomass gasifier for gasification of renewable fuels presents a downdraft gasifier with controllable additional heat energy supply to the biomass using th…	Fuel	NA	162361	90	11	2011-11-01	2011-11-01	3352	3358	10.1016/j.fuel.2011.06.003	0	FALSE	FALSE	NA	Journal	Copyright Ã‚Â© 2011 Elsevier Ltd. All rights reserved.	S0016-2361(11)00308-5	80052761415	2-s2.0-80052761415	The main aim of the study was to develop and investigate a small-scale experimental gasification technique for the effective thermal decomposition of pelletized renewable fuels (wood sawdust, wheat...	NA	NA	NA	Biomass mixture | Gasifier | Products composition	NA	wheat_straw
109	1-s2.0-S0016236111003085	TRUE	DOI:10.1016/j.fuel.2011.06.003	https://api.elsevier.com/content/article/pii/S0016236111003085	Gasification of pelletized renewable fuel for clean energy production	A., Lickrastina	Abstract The main aim of the study was to develop and investigate a small-scale experimental gasification technique for the effective thermal decomposition of pelletized renewable fuels (wood sawdust, wheat straw). The technical solution of the biomass gasifier for gasification of renewable fuels presents a downdraft gasifier with controllable additional heat energy supply to the biomass using th…	Fuel	NA	162361	90	11	2011-11-01	2011-11-01	3352	3358	10.1016/j.fuel.2011.06.003	0	FALSE	FALSE	NA	Journal	Copyright Ã‚Â© 2011 Elsevier Ltd. All rights reserved.	S0016-2361(11)00308-5	80052761415	2-s2.0-80052761415	The main aim of the study was to develop and investigate a small-scale experimental gasification technique for the effective thermal decomposition of pelletized renewable fuels (wood sawdust, wheat...	NA	NA	NA	Biomass mixture | Gasifier | Products composition	NA	briquette_/_pellet_fuel
110	1-s2.0-S0016236111003498	TRUE	DOI:10.1016/j.fuel.2011.06.031	https://api.elsevier.com/content/article/pii/S0016236111003498	A life cycle assessment of advanced biofuel production from a hectare of corn	Nathan, Kauffman	Abstract Conventional agricultural life cycle assessments (LCAs) measure greenhouse gas (GHG) emissions for biofuel pathways as the amount of carbon dioxide equivalent emitted per unit of energy provided by the pathway (i.e. gCO2e/MJ). This measure of GHG emissions, as computed by the Environmental Protection Agency (EPA) is then used to determine the extent to which the corresponding biofuel pat…	Fuel	NA	162361	90	11	2011-11-01	2011-11-01	3306	3314	10.1016/j.fuel.2011.06.031	0	FALSE	FALSE	NA	Journal	Copyright Ã‚Â© 2011 Elsevier Ltd. All rights reserved.	S0016-2361(11)00349-8	80052692098	2-s2.0-80052692098	Conventional agricultural life cycle assessments (LCAs) measure greenhouse gas (GHG) emissions for biofuel pathways as the amount of carbon dioxide equivalent emitted per unit of energy provided by...	NA	NA	NA	Biofuels | Life cycle assessment | Pyrolysis | Renewable fuel standard	NA	ethanol_/_bioethanol
111	1-s2.0-S0016236111003498	TRUE	DOI:10.1016/j.fuel.2011.06.031	https://api.elsevier.com/content/article/pii/S0016236111003498	A life cycle assessment of advanced biofuel production from a hectare of corn	Nathan, Kauffman	Abstract Conventional agricultural life cycle assessments (LCAs) measure greenhouse gas (GHG) emissions for biofuel pathways as the amount of carbon dioxide equivalent emitted per unit of energy provided by the pathway (i.e. gCO2e/MJ). This measure of GHG emissions, as computed by the Environmental Protection Agency (EPA) is then used to determine the extent to which the corresponding biofuel pat…	Fuel	NA	162361	90	11	2011-11-01	2011-11-01	3306	3314	10.1016/j.fuel.2011.06.031	0	FALSE	FALSE	NA	Journal	Copyright Ã‚Â© 2011 Elsevier Ltd. All rights reserved.	S0016-2361(11)00349-8	80052692098	2-s2.0-80052692098	Conventional agricultural life cycle assessments (LCAs) measure greenhouse gas (GHG) emissions for biofuel pathways as the amount of carbon dioxide equivalent emitted per unit of energy provided by...	NA	NA	NA	Biofuels | Life cycle assessment | Pyrolysis | Renewable fuel standard	NA	maize_stover
112	1-s2.0-S001623611100398X	TRUE	DOI:10.1016/j.fuel.2011.06.073	https://api.elsevier.com/content/article/pii/S001623611100398X	Production and utilization performance of a glycerol derived additive for diesel engines	Diana, HernÃƒÂ¡ndez	Abstract Oxygenated additives have been the subject of much research because they notably improve the fuel characteristics and combustion performance. Moreover, there is a tendency to use oxygenated additives derived from biomass. In the case of glycerol, previous studies have shown that oxygenated compounds are generated by dehydration, decomposition and isomerization reactions from glycerol and…	Fuel	NA	162361	92	1	2012-02-01	2012-02-01	130	136	10.1016/j.fuel.2011.06.073	0	FALSE	FALSE	NA	Journal	Copyright Ã‚Â© 2011 Elsevier Ltd. All rights reserved.	S0016-2361(11)00398-X	80055044766	2-s2.0-80055044766	Oxygenated additives have been the subject of much research because they notably improve the fuel characteristics and combustion performance. Moreover, there is a tendency to use oxygenated additives...	NA	NA	NA	Glycerol | Catalysis | Decomposition | Emissions | Combustion	NA	dedicated_combustion_/_incineration
113	1-s2.0-S001623611100398X	TRUE	DOI:10.1016/j.fuel.2011.06.073	https://api.elsevier.com/content/article/pii/S001623611100398X	Production and utilization performance of a glycerol derived additive for diesel engines	Diana, HernÃƒÂ¡ndez	Abstract Oxygenated additives have been the subject of much research because they notably improve the fuel characteristics and combustion performance. Moreover, there is a tendency to use oxygenated additives derived from biomass. In the case of glycerol, previous studies have shown that oxygenated compounds are generated by dehydration, decomposition and isomerization reactions from glycerol and…	Fuel	NA	162361	92	1	2012-02-01	2012-02-01	130	136	10.1016/j.fuel.2011.06.073	0	FALSE	FALSE	NA	Journal	Copyright Ã‚Â© 2011 Elsevier Ltd. All rights reserved.	S0016-2361(11)00398-X	80055044766	2-s2.0-80055044766	Oxygenated additives have been the subject of much research because they notably improve the fuel characteristics and combustion performance. Moreover, there is a tendency to use oxygenated additives...	NA	NA	NA	Glycerol | Catalysis | Decomposition | Emissions | Combustion	NA	glycerol
114	1-s2.0-S0016236111004091	TRUE	DOI:10.1016/j.fuel.2011.07.012	https://api.elsevier.com/content/article/pii/S0016236111004091	Production of fermentable sugars from enzymatic hydrolysis of pretreated municipal solid waste after autoclave process	Sujing, Li	Abstract A ligno-cellulosic concentrate from municipal solid waste (MSW) obtained after an autoclave separation process was investigated for its potential as a feedstock to produce fermentable sugars for ethanol production. A maximum enzymatic hydrolysis conversion of 53% of the cellulose and hemi-cellulose was found using a particle size range of 150Ã¢â‚¬â€œ300ÃŽÂ¼m hydrolyzed in a 100ml buffer …	Fuel	NA	162361	92	1	2012-02-01	2012-02-01	84	88	10.1016/j.fuel.2011.07.012	0	FALSE	FALSE	NA	Journal	Copyright Ã‚Â© 2011 Elsevier Ltd. Published by Elsevier Ltd. All rights reserved.	S0016-2361(11)00409-1	NA	NA	A ligno-cellulosic concentrate from municipal solid waste (MSW) obtained after an autoclave separation process was investigated for its potential as a feedstock to produce fermentable sugars for ethanol...	NA	NA	NA	Ligno-cellulosic MSW concentrates | Autoclave process | Enzymatic hydrolysis	NA	organic_housewaste
115	1-s2.0-S0016236111004091	TRUE	DOI:10.1016/j.fuel.2011.07.012	https://api.elsevier.com/content/article/pii/S0016236111004091	Production of fermentable sugars from enzymatic hydrolysis of pretreated municipal solid waste after autoclave process	Sujing, Li	Abstract A ligno-cellulosic concentrate from municipal solid waste (MSW) obtained after an autoclave separation process was investigated for its potential as a feedstock to produce fermentable sugars for ethanol production. A maximum enzymatic hydrolysis conversion of 53% of the cellulose and hemi-cellulose was found using a particle size range of 150Ã¢â‚¬â€œ300ÃŽÂ¼m hydrolyzed in a 100ml buffer …	Fuel	NA	162361	92	1	2012-02-01	2012-02-01	84	88	10.1016/j.fuel.2011.07.012	0	FALSE	FALSE	NA	Journal	Copyright Ã‚Â© 2011 Elsevier Ltd. Published by Elsevier Ltd. All rights reserved.	S0016-2361(11)00409-1	NA	NA	A ligno-cellulosic concentrate from municipal solid waste (MSW) obtained after an autoclave separation process was investigated for its potential as a feedstock to produce fermentable sugars for ethanol...	NA	NA	NA	Ligno-cellulosic MSW concentrates | Autoclave process | Enzymatic hydrolysis	NA	animal_feed
116	1-s2.0-S0016236111004091	TRUE	DOI:10.1016/j.fuel.2011.07.012	https://api.elsevier.com/content/article/pii/S0016236111004091	Production of fermentable sugars from enzymatic hydrolysis of pretreated municipal solid waste after autoclave process	Sujing, Li	Abstract A ligno-cellulosic concentrate from municipal solid waste (MSW) obtained after an autoclave separation process was investigated for its potential as a feedstock to produce fermentable sugars for ethanol production. A maximum enzymatic hydrolysis conversion of 53% of the cellulose and hemi-cellulose was found using a particle size range of 150Ã¢â‚¬â€œ300ÃŽÂ¼m hydrolyzed in a 100ml buffer …	Fuel	NA	162361	92	1	2012-02-01	2012-02-01	84	88	10.1016/j.fuel.2011.07.012	0	FALSE	FALSE	NA	Journal	Copyright Ã‚Â© 2011 Elsevier Ltd. Published by Elsevier Ltd. All rights reserved.	S0016-2361(11)00409-1	NA	NA	A ligno-cellulosic concentrate from municipal solid waste (MSW) obtained after an autoclave separation process was investigated for its potential as a feedstock to produce fermentable sugars for ethanol...	NA	NA	NA	Ligno-cellulosic MSW concentrates | Autoclave process | Enzymatic hydrolysis	NA	ethanol_/_bioethanol
117	1-s2.0-S0016236111004169	TRUE	DOI:10.1016/j.fuel.2011.07.019	https://api.elsevier.com/content/article/pii/S0016236111004169	Effects of torrefaction process parameters on biomass feedstock upgrading	D., Medic	Abstract Biomass is a primary source of renewable carbon that can be utilized as a feedstock for biofuels or biochemicals production in order to achieve energy independence. The low bulk density, high moisture content, degradation during storage and low energy density of raw lignocellulosic biomass are all significant challenges in supplying agricultural residues as a cellulosic feedstock. Torref…	Fuel	NA	162361	91	1	2012-01-01	2012-01-01	147	154	10.1016/j.fuel.2011.07.019	0	FALSE	FALSE	NA	Journal	Copyright Ã‚Â© 2011 Elsevier Ltd. All rights reserved.	S0016-2361(11)00416-9	80054996648	2-s2.0-80054996648	Biomass is a primary source of renewable carbon that can be utilized as a feedstock for biofuels or biochemicals production in order to achieve energy independence. The low bulk density, high moisture...	NA	NA	NA	Biomass | Corn stover | Torrefaction | Pretreatment	NA	maize_stover
118	1-s2.0-S0016236111004169	TRUE	DOI:10.1016/j.fuel.2011.07.019	https://api.elsevier.com/content/article/pii/S0016236111004169	Effects of torrefaction process parameters on biomass feedstock upgrading	D., Medic	Abstract Biomass is a primary source of renewable carbon that can be utilized as a feedstock for biofuels or biochemicals production in order to achieve energy independence. The low bulk density, high moisture content, degradation during storage and low energy density of raw lignocellulosic biomass are all significant challenges in supplying agricultural residues as a cellulosic feedstock. Torref…	Fuel	NA	162361	91	1	2012-01-01	2012-01-01	147	154	10.1016/j.fuel.2011.07.019	0	FALSE	FALSE	NA	Journal	Copyright Ã‚Â© 2011 Elsevier Ltd. All rights reserved.	S0016-2361(11)00416-9	80054996648	2-s2.0-80054996648	Biomass is a primary source of renewable carbon that can be utilized as a feedstock for biofuels or biochemicals production in order to achieve energy independence. The low bulk density, high moisture...	NA	NA	NA	Biomass | Corn stover | Torrefaction | Pretreatment	NA	torrefaction
119	1-s2.0-S0016236111005126	TRUE	DOI:10.1016/j.fuel.2011.08.040	https://api.elsevier.com/content/article/pii/S0016236111005126	Production of hydrocarbons from fatty acids and animal fat in the presence of water and sodium carbonate: Reactor performance and fuel properties	Bernd, Weber	Abstract The thermal degradation of free fatty acids and animal fat in a moving bed of sodium carbonate and 5wt% of water were carried out at 430Ã‚Â±20Ã‚Â°C at a pilot scale plant. During start-up the loading rates for a 60:40 mixture of oleic and stearic acids were 10kg/h resulting in a 69Ã‚Â±5% of bio-crude. The acidity index was remarkably low within a range of 0.64Ã¢â‚¬â€œ0.80mg KOH/g during …	Fuel	NA	162361	94	NA	2012-04-01	2012-04-01	262	269	10.1016/j.fuel.2011.08.040	0	FALSE	FALSE	NA	Journal	Copyright Ã‚Â© 2011 Elsevier Ltd. All rights reserved.	S0016-2361(11)00512-6	84856723894	2-s2.0-84856723894	The thermal degradation of free fatty acids and animal fat in a moving bed of sodium carbonate and 5wt% of water were carried out at 430Ã‚Â±20Ã‚Â°C at a pilot scale plant. During start-up the loading rates...	NA	NA	NA	Thermal degradation | Animal fat | Sodium carbonate | Biofuels	NA	fatty_acids		fatty_acids
120	1-s2.0-S0016236111005126	TRUE	DOI:10.1016/j.fuel.2011.08.040	https://api.elsevier.com/content/article/pii/S0016236111005126	Production of hydrocarbons from fatty acids and animal fat in the presence of water and sodium carbonate: Reactor performance and fuel properties	Bernd, Weber	Abstract The thermal degradation of free fatty acids and animal fat in a moving bed of sodium carbonate and 5wt% of water were carried out at 430Ã‚Â±20Ã‚Â°C at a pilot scale plant. During start-up the loading rates for a 60:40 mixture of oleic and stearic acids were 10kg/h resulting in a 69Ã‚Â±5% of bio-crude. The acidity index was remarkably low within a range of 0.64Ã¢â‚¬â€œ0.80mg KOH/g during …	Fuel	NA	162361	94	NA	2012-04-01	2012-04-01	262	269	10.1016/j.fuel.2011.08.040	0	FALSE	FALSE	NA	Journal	Copyright Ã‚Â© 2011 Elsevier Ltd. All rights reserved.	S0016-2361(11)00512-6	84856723894	2-s2.0-84856723894	The thermal degradation of free fatty acids and animal fat in a moving bed of sodium carbonate and 5wt% of water were carried out at 430Ã‚Â±20Ã‚Â°C at a pilot scale plant. During start-up the loading rates...	NA	NA	NA	Thermal degradation | Animal fat | Sodium carbonate | Biofuels	NA	biogasoline
121	1-s2.0-S0016236111005126	TRUE	DOI:10.1016/j.fuel.2011.08.040	https://api.elsevier.com/content/article/pii/S0016236111005126	Production of hydrocarbons from fatty acids and animal fat in the presence of water and sodium carbonate: Reactor performance and fuel properties	Bernd, Weber	Abstract The thermal degradation of free fatty acids and animal fat in a moving bed of sodium carbonate and 5wt% of water were carried out at 430Ã‚Â±20Ã‚Â°C at a pilot scale plant. During start-up the loading rates for a 60:40 mixture of oleic and stearic acids were 10kg/h resulting in a 69Ã‚Â±5% of bio-crude. The acidity index was remarkably low within a range of 0.64Ã¢â‚¬â€œ0.80mg KOH/g during …	Fuel	NA	162361	94	NA	2012-04-01	2012-04-01	262	269	10.1016/j.fuel.2011.08.040	0	FALSE	FALSE	NA	Journal	Copyright Ã‚Â© 2011 Elsevier Ltd. All rights reserved.	S0016-2361(11)00512-6	84856723894	2-s2.0-84856723894	The thermal degradation of free fatty acids and animal fat in a moving bed of sodium carbonate and 5wt% of water were carried out at 430Ã‚Â±20Ã‚Â°C at a pilot scale plant. During start-up the loading rates...	NA	NA	NA	Thermal degradation | Animal fat | Sodium carbonate | Biofuels	NA	animal_fats
122	1-s2.0-S0016236112000221	TRUE	DOI:10.1016/j.fuel.2012.01.011	https://api.elsevier.com/content/article/pii/S0016236112000221	Amphiphilic catalysts based on onion-like carbon over magnetic iron oxide for petrochemical industry use	Wladmir F., Souza	Abstract Composites formed by carbon over magnetite were synthesized by impregnating iron oxide with glycerine. The formation of onion-like carbon was found, presenting concentric turbostratic shells with interplanar spacing of approximately 0.32nm. The composite presented spherical iron oxide particles with magnetic and amphiphilic properties, which is interesting for use as a catalyst in the pe…	Fuel	NA	162361	96	NA	2012-06-01	2012-06-01	604	607	10.1016/j.fuel.2012.01.011	1	TRUE	FALSE	http://www.elsevier.com/open-access/userlicense/1.0/	Journal	Copyright Ã‚Â© 2012 Elsevier Ltd.	S0016-2361(12)00022-1	84858293832	2-s2.0-84858293832	Composites formed by carbon over magnetite were synthesized by impregnating iron oxide with glycerine. The formation of onion-like carbon was found, presenting concentric turbostratic shells with interplanar...	NA	NA	Short communication	Magnetic iron oxide | Amphiphilic catalyst | Oxidation process	NA	glycerol
123	1-s2.0-S0016236112000221	TRUE	DOI:10.1016/j.fuel.2012.01.011	https://api.elsevier.com/content/article/pii/S0016236112000221	Amphiphilic catalysts based on onion-like carbon over magnetic iron oxide for petrochemical industry use	Wladmir F., Souza	Abstract Composites formed by carbon over magnetite were synthesized by impregnating iron oxide with glycerine. The formation of onion-like carbon was found, presenting concentric turbostratic shells with interplanar spacing of approximately 0.32nm. The composite presented spherical iron oxide particles with magnetic and amphiphilic properties, which is interesting for use as a catalyst in the pe…	Fuel	NA	162361	96	NA	2012-06-01	2012-06-01	604	607	10.1016/j.fuel.2012.01.011	1	TRUE	FALSE	http://www.elsevier.com/open-access/userlicense/1.0/	Journal	Copyright Ã‚Â© 2012 Elsevier Ltd.	S0016-2361(12)00022-1	84858293832	2-s2.0-84858293832	Composites formed by carbon over magnetite were synthesized by impregnating iron oxide with glycerine. The formation of onion-like carbon was found, presenting concentric turbostratic shells with interplanar...	NA	NA	Short communication	Magnetic iron oxide | Amphiphilic catalyst | Oxidation process	NA	composites
124	1-s2.0-S0016236112001342	TRUE	DOI:10.1016/j.fuel.2012.02.011	https://api.elsevier.com/content/article/pii/S0016236112001342	Comparison of batch aqueous-phase reforming of glycerol and lignocellulosic biomass hydrolysate	Bahar, Meryemoglu	Abstract The present study was designed to evaluate gasification performance of glycerol, overproduced from biodiesel fuel production, and lignocellulosic biomass hydrolysate for hydrogen gas production by aqueous-phase reforming (APR) process. Lignocellulosic biomass hydrolysate was prepared by solubilization of wheat straw under subcritical water condition. APR experiments were performed in a b…	Fuel	NA	162361	97	NA	2012-07-01	2012-07-01	241	244	10.1016/j.fuel.2012.02.011	0	FALSE	FALSE	NA	Journal	Copyright Ã‚Â© 2012 Elsevier Ltd. All rights reserved.	S0016-2361(12)00134-2	84861200245	2-s2.0-84861200245	The present study was designed to evaluate gasification performance of glycerol, overproduced from biodiesel fuel production, and lignocellulosic biomass hydrolysate for hydrogen gas production by aqueous-phase...	NA	NA	NA	Aqueous-phase reforming | Glycerol | Lignocellulosic biomass | Hydrogen | Catalyst	NA	biodiesel
125	1-s2.0-S0016236112001342	TRUE	DOI:10.1016/j.fuel.2012.02.011	https://api.elsevier.com/content/article/pii/S0016236112001342	Comparison of batch aqueous-phase reforming of glycerol and lignocellulosic biomass hydrolysate	Bahar, Meryemoglu	Abstract The present study was designed to evaluate gasification performance of glycerol, overproduced from biodiesel fuel production, and lignocellulosic biomass hydrolysate for hydrogen gas production by aqueous-phase reforming (APR) process. Lignocellulosic biomass hydrolysate was prepared by solubilization of wheat straw under subcritical water condition. APR experiments were performed in a b…	Fuel	NA	162361	97	NA	2012-07-01	2012-07-01	241	244	10.1016/j.fuel.2012.02.011	0	FALSE	FALSE	NA	Journal	Copyright Ã‚Â© 2012 Elsevier Ltd. All rights reserved.	S0016-2361(12)00134-2	84861200245	2-s2.0-84861200245	The present study was designed to evaluate gasification performance of glycerol, overproduced from biodiesel fuel production, and lignocellulosic biomass hydrolysate for hydrogen gas production by aqueous-phase...	NA	NA	NA	Aqueous-phase reforming | Glycerol | Lignocellulosic biomass | Hydrogen | Catalyst	NA	wheat_straw
126	1-s2.0-S0016236112001342	TRUE	DOI:10.1016/j.fuel.2012.02.011	https://api.elsevier.com/content/article/pii/S0016236112001342	Comparison of batch aqueous-phase reforming of glycerol and lignocellulosic biomass hydrolysate	Bahar, Meryemoglu	Abstract The present study was designed to evaluate gasification performance of glycerol, overproduced from biodiesel fuel production, and lignocellulosic biomass hydrolysate for hydrogen gas production by aqueous-phase reforming (APR) process. Lignocellulosic biomass hydrolysate was prepared by solubilization of wheat straw under subcritical water condition. APR experiments were performed in a b…	Fuel	NA	162361	97	NA	2012-07-01	2012-07-01	241	244	10.1016/j.fuel.2012.02.011	0	FALSE	FALSE	NA	Journal	Copyright Ã‚Â© 2012 Elsevier Ltd. All rights reserved.	S0016-2361(12)00134-2	84861200245	2-s2.0-84861200245	The present study was designed to evaluate gasification performance of glycerol, overproduced from biodiesel fuel production, and lignocellulosic biomass hydrolysate for hydrogen gas production by aqueous-phase...	NA	NA	NA	Aqueous-phase reforming | Glycerol | Lignocellulosic biomass | Hydrogen | Catalyst	NA	glycerol
127	1-s2.0-S0016236112002736	TRUE	DOI:10.1016/j.fuel.2012.04.009	https://api.elsevier.com/content/article/pii/S0016236112002736	Biodiesel production based on heterogeneous process catalyzed by solid waste coral fragment	Wuttichai, Roschat	Abstract We present an environmentally friendly, efficient, simple heterogeneous transesterification process combining palm oil, soybean oil, rice bran oil, and waste cooking oil with methanol to make a biodiesel and glycerol by-product using calcined waste coral fragments in solid form as a catalyst. Under optimum reaction conditions, the coral fragments calcined at 700Ã‚Â°C for 1h; catalyst/oil…	Fuel	NA	162361	98	NA	2012-08-01	2012-08-01	194	202	10.1016/j.fuel.2012.04.009	0	FALSE	FALSE	NA	Journal	Copyright Ã‚Â© 2012 Elsevier Ltd. All rights reserved.	S0016-2361(12)00273-6	84861971747	2-s2.0-84861971747	We present an environmentally friendly, efficient, simple heterogeneous transesterification process combining palm oil, soybean oil, rice bran oil, and waste cooking oil with methanol to make a biodiesel...	NA	NA	NA	Biodiesel | Glycerol | Heterogeneous process | Solid catalyst | Coral fragment	NA	biodiesel
128	1-s2.0-S0016236112002736	TRUE	DOI:10.1016/j.fuel.2012.04.009	https://api.elsevier.com/content/article/pii/S0016236112002736	Biodiesel production based on heterogeneous process catalyzed by solid waste coral fragment	Wuttichai, Roschat	Abstract We present an environmentally friendly, efficient, simple heterogeneous transesterification process combining palm oil, soybean oil, rice bran oil, and waste cooking oil with methanol to make a biodiesel and glycerol by-product using calcined waste coral fragments in solid form as a catalyst. Under optimum reaction conditions, the coral fragments calcined at 700Ã‚Â°C for 1h; catalyst/oil…	Fuel	NA	162361	98	NA	2012-08-01	2012-08-01	194	202	10.1016/j.fuel.2012.04.009	0	FALSE	FALSE	NA	Journal	Copyright Ã‚Â© 2012 Elsevier Ltd. All rights reserved.	S0016-2361(12)00273-6	84861971747	2-s2.0-84861971747	We present an environmentally friendly, efficient, simple heterogeneous transesterification process combining palm oil, soybean oil, rice bran oil, and waste cooking oil with methanol to make a biodiesel...	NA	NA	NA	Biodiesel | Glycerol | Heterogeneous process | Solid catalyst | Coral fragment	NA	glycerol
129	1-s2.0-S0016236112002736	TRUE	DOI:10.1016/j.fuel.2012.04.009	https://api.elsevier.com/content/article/pii/S0016236112002736	Biodiesel production based on heterogeneous process catalyzed by solid waste coral fragment	Wuttichai, Roschat	Abstract We present an environmentally friendly, efficient, simple heterogeneous transesterification process combining palm oil, soybean oil, rice bran oil, and waste cooking oil with methanol to make a biodiesel and glycerol by-product using calcined waste coral fragments in solid form as a catalyst. Under optimum reaction conditions, the coral fragments calcined at 700Ã‚Â°C for 1h; catalyst/oil…	Fuel	NA	162361	98	NA	2012-08-01	2012-08-01	194	202	10.1016/j.fuel.2012.04.009	0	FALSE	FALSE	NA	Journal	Copyright Ã‚Â© 2012 Elsevier Ltd. All rights reserved.	S0016-2361(12)00273-6	84861971747	2-s2.0-84861971747	We present an environmentally friendly, efficient, simple heterogeneous transesterification process combining palm oil, soybean oil, rice bran oil, and waste cooking oil with methanol to make a biodiesel...	NA	NA	NA	Biodiesel | Glycerol | Heterogeneous process | Solid catalyst | Coral fragment	NA	methanol
130	1-s2.0-S0016236112004401	TRUE	DOI:10.1016/j.fuel.2012.06.020	https://api.elsevier.com/content/article/pii/S0016236112004401	Synthesis and characterization of ethylic biodiesel from animal fat wastes	Anildo, Cunha	Abstract This study optimized the conversion of animal fat wastes into ethylic biodiesel by alkali-catalyzed process under mild conditions. A mix of chicken and swine fat residues was used as feedstock for biodiesel production. A full 33 factorial design was used to optimize process parameters for maximum fatty acid ethyl esters yield. Factors were evaluated at three different levels: temperature…	Fuel	NA	162361	105	NA	2013-03-01	2013-03-01	228	234	10.1016/j.fuel.2012.06.020	1	TRUE	FALSE	http://www.elsevier.com/open-access/userlicense/1.0/	Journal	Copyright Ã‚Â© 2012 Elsevier Ltd.	S0016-2361(12)00440-1	84870420478	2-s2.0-84870420478	This study optimized the conversion of animal fat wastes into ethylic biodiesel by alkali-catalyzed process under mild conditions. A mix of chicken and swine fat residues was used as feedstock for biodiesel...	NA	NA	NA	Animal fat | Ethanolysis | Chicken | Fatty acid ethyl esters | Swine	NA	ethanol_/_bioethanol
131	1-s2.0-S0016236112004401	TRUE	DOI:10.1016/j.fuel.2012.06.020	https://api.elsevier.com/content/article/pii/S0016236112004401	Synthesis and characterization of ethylic biodiesel from animal fat wastes	Anildo, Cunha	Abstract This study optimized the conversion of animal fat wastes into ethylic biodiesel by alkali-catalyzed process under mild conditions. A mix of chicken and swine fat residues was used as feedstock for biodiesel production. A full 33 factorial design was used to optimize process parameters for maximum fatty acid ethyl esters yield. Factors were evaluated at three different levels: temperature…	Fuel	NA	162361	105	NA	2013-03-01	2013-03-01	228	234	10.1016/j.fuel.2012.06.020	1	TRUE	FALSE	http://www.elsevier.com/open-access/userlicense/1.0/	Journal	Copyright Ã‚Â© 2012 Elsevier Ltd.	S0016-2361(12)00440-1	84870420478	2-s2.0-84870420478	This study optimized the conversion of animal fat wastes into ethylic biodiesel by alkali-catalyzed process under mild conditions. A mix of chicken and swine fat residues was used as feedstock for biodiesel...	NA	NA	NA	Animal fat | Ethanolysis | Chicken | Fatty acid ethyl esters | Swine	NA	biodiesel
132	1-s2.0-S0016236112004401	TRUE	DOI:10.1016/j.fuel.2012.06.020	https://api.elsevier.com/content/article/pii/S0016236112004401	Synthesis and characterization of ethylic biodiesel from animal fat wastes	Anildo, Cunha	Abstract This study optimized the conversion of animal fat wastes into ethylic biodiesel by alkali-catalyzed process under mild conditions. A mix of chicken and swine fat residues was used as feedstock for biodiesel production. A full 33 factorial design was used to optimize process parameters for maximum fatty acid ethyl esters yield. Factors were evaluated at three different levels: temperature…	Fuel	NA	162361	105	NA	2013-03-01	2013-03-01	228	234	10.1016/j.fuel.2012.06.020	1	TRUE	FALSE	http://www.elsevier.com/open-access/userlicense/1.0/	Journal	Copyright Ã‚Â© 2012 Elsevier Ltd.	S0016-2361(12)00440-1	84870420478	2-s2.0-84870420478	This study optimized the conversion of animal fat wastes into ethylic biodiesel by alkali-catalyzed process under mild conditions. A mix of chicken and swine fat residues was used as feedstock for biodiesel...	NA	NA	NA	Animal fat | Ethanolysis | Chicken | Fatty acid ethyl esters | Swine	NA	glycerol
133	1-s2.0-S0016236112004401	TRUE	DOI:10.1016/j.fuel.2012.06.020	https://api.elsevier.com/content/article/pii/S0016236112004401	Synthesis and characterization of ethylic biodiesel from animal fat wastes	Anildo, Cunha	Abstract This study optimized the conversion of animal fat wastes into ethylic biodiesel by alkali-catalyzed process under mild conditions. A mix of chicken and swine fat residues was used as feedstock for biodiesel production. A full 33 factorial design was used to optimize process parameters for maximum fatty acid ethyl esters yield. Factors were evaluated at three different levels: temperature…	Fuel	NA	162361	105	NA	2013-03-01	2013-03-01	228	234	10.1016/j.fuel.2012.06.020	1	TRUE	FALSE	http://www.elsevier.com/open-access/userlicense/1.0/	Journal	Copyright Ã‚Â© 2012 Elsevier Ltd.	S0016-2361(12)00440-1	84870420478	2-s2.0-84870420478	This study optimized the conversion of animal fat wastes into ethylic biodiesel by alkali-catalyzed process under mild conditions. A mix of chicken and swine fat residues was used as feedstock for biodiesel...	NA	NA	NA	Animal fat | Ethanolysis | Chicken | Fatty acid ethyl esters | Swine	NA	animal_fats
134	1-s2.0-S0016236112006539	TRUE	DOI:10.1016/j.fuel.2012.08.017	https://api.elsevier.com/content/article/pii/S0016236112006539	Mathematical modelling of straw combustion in a moving bed combustor: A two dimensional approach	Biljana, MiljkoviÃ„â€¡	Abstract Combustion of wheat straw in Serbia is a promising way of energy conversion. Straw is renewable and environmentally friendly energy source that can be burned in direct combustion process to provide electricity and heat. Despite its apparent simplicity, direct combustion is a complex process from a technological point of view.Conventional combustion equipment is not designed for burning a…	Fuel	NA	162361	104	NA	2013-02-01	2013-02-01	351	364	10.1016/j.fuel.2012.08.017	0	FALSE	FALSE	NA	Journal	Copyright Ã‚Â© 2012 Elsevier Ltd. All rights reserved.	S0016-2361(12)00653-9	84870428620	2-s2.0-84870428620	Combustion of wheat straw in Serbia is a promising way of energy conversion. Straw is renewable and environmentally friendly energy source that can be burned in direct combustion process to provide...	NA	10th Japan/China Symposium on Coal and C1 Chemistry	NA	Combustion | Biomass | Moving bed | Wheat straw | Mathematical model	NA	dedicated_combustion_/_incineration
135	1-s2.0-S0016236112006539	TRUE	DOI:10.1016/j.fuel.2012.08.017	https://api.elsevier.com/content/article/pii/S0016236112006539	Mathematical modelling of straw combustion in a moving bed combustor: A two dimensional approach	Biljana, MiljkoviÃ„â€¡	Abstract Combustion of wheat straw in Serbia is a promising way of energy conversion. Straw is renewable and environmentally friendly energy source that can be burned in direct combustion process to provide electricity and heat. Despite its apparent simplicity, direct combustion is a complex process from a technological point of view.Conventional combustion equipment is not designed for burning a…	Fuel	NA	162361	104	NA	2013-02-01	2013-02-01	351	364	10.1016/j.fuel.2012.08.017	0	FALSE	FALSE	NA	Journal	Copyright Ã‚Â© 2012 Elsevier Ltd. All rights reserved.	S0016-2361(12)00653-9	84870428620	2-s2.0-84870428620	Combustion of wheat straw in Serbia is a promising way of energy conversion. Straw is renewable and environmentally friendly energy source that can be burned in direct combustion process to provide...	NA	10th Japan/China Symposium on Coal and C1 Chemistry	NA	Combustion | Biomass | Moving bed | Wheat straw | Mathematical model	NA	wheat_straw
136	1-s2.0-S0016236113000847	TRUE	DOI:10.1016/j.fuel.2013.01.075	https://api.elsevier.com/content/article/pii/S0016236113000847	A comparative study of straw, perennial grasses and hardwoods in terms of fast pyrolysis products	C.E., Greenhalf	Abstract The aim of this study is to characterise and compare fast pyrolysis product yields from straw, high yielding perennial grasses and hardwoods. Feedstocks selected for this study include: wheat straw (Triticum aestivum), switch grass (Panicum virgatum), miscanthus (Miscanthus x giganteus), willow short rotation coppice (Salix viminalis) and beech wood (Fagus sylvatica). The experimental wo…	Fuel	NA	162361	108	NA	2013-06-01	2013-06-01	216	230	10.1016/j.fuel.2013.01.075	0	FALSE	FALSE	NA	Journal	Copyright Ã‚Â© 2013 Elsevier Ltd. All rights reserved.	S0016-2361(13)00084-7	84876373496	2-s2.0-84876373496	The aim of this study is to characterise and compare fast pyrolysis product yields from straw, high yielding perennial grasses and hardwoods. Feedstocks selected for this study include: wheat straw...	NA	NA	NA	Biomass | TGA | Py-GCÃ¢â‚¬â€œMS | Fast pyrolysis | Bio-oil	NA	wheat_straw
137	1-s2.0-S0016236113000847	TRUE	DOI:10.1016/j.fuel.2013.01.075	https://api.elsevier.com/content/article/pii/S0016236113000847	A comparative study of straw, perennial grasses and hardwoods in terms of fast pyrolysis products	C.E., Greenhalf	Abstract The aim of this study is to characterise and compare fast pyrolysis product yields from straw, high yielding perennial grasses and hardwoods. Feedstocks selected for this study include: wheat straw (Triticum aestivum), switch grass (Panicum virgatum), miscanthus (Miscanthus x giganteus), willow short rotation coppice (Salix viminalis) and beech wood (Fagus sylvatica). The experimental wo…	Fuel	NA	162361	108	NA	2013-06-01	2013-06-01	216	230	10.1016/j.fuel.2013.01.075	0	FALSE	FALSE	NA	Journal	Copyright Ã‚Â© 2013 Elsevier Ltd. All rights reserved.	S0016-2361(13)00084-7	84876373496	2-s2.0-84876373496	The aim of this study is to characterise and compare fast pyrolysis product yields from straw, high yielding perennial grasses and hardwoods. Feedstocks selected for this study include: wheat straw...	NA	NA	NA	Biomass | TGA | Py-GCÃ¢â‚¬â€œMS | Fast pyrolysis | Bio-oil	NA	furfural
138	1-s2.0-S0016236113000847	TRUE	DOI:10.1016/j.fuel.2013.01.075	https://api.elsevier.com/content/article/pii/S0016236113000847	A comparative study of straw, perennial grasses and hardwoods in terms of fast pyrolysis products	C.E., Greenhalf	Abstract The aim of this study is to characterise and compare fast pyrolysis product yields from straw, high yielding perennial grasses and hardwoods. Feedstocks selected for this study include: wheat straw (Triticum aestivum), switch grass (Panicum virgatum), miscanthus (Miscanthus x giganteus), willow short rotation coppice (Salix viminalis) and beech wood (Fagus sylvatica). The experimental wo…	Fuel	NA	162361	108	NA	2013-06-01	2013-06-01	216	230	10.1016/j.fuel.2013.01.075	0	FALSE	FALSE	NA	Journal	Copyright Ã‚Â© 2013 Elsevier Ltd. All rights reserved.	S0016-2361(13)00084-7	84876373496	2-s2.0-84876373496	The aim of this study is to characterise and compare fast pyrolysis product yields from straw, high yielding perennial grasses and hardwoods. Feedstocks selected for this study include: wheat straw...	NA	NA	NA	Biomass | TGA | Py-GCÃ¢â‚¬â€œMS | Fast pyrolysis | Bio-oil	NA	phenol
139	1-s2.0-S0016236113003700	TRUE	DOI:10.1016/j.fuel.2013.04.069	https://api.elsevier.com/content/article/pii/S0016236113003700	Direct conversion of glycerol into bio-oil via hydrotreatment using supported metal catalysts	Matthew, Tymchyshyn	Abstract Hydrotreatment of glycerol (a byproduct of bio-diesel production) was conducted in the presence of a number of different supported metal catalysts at a temperature of 300Ã‚Â°C under 5MPa initial pressure of H2. The bio-oil products were comprehensively characterized to determine their physical/chemical properties. Experiments with supported catalyst metals revealed a positive correlation…	Fuel	NA	162361	112	NA	2013-10-01	2013-10-01	193	202	10.1016/j.fuel.2013.04.069	0	FALSE	FALSE	NA	Journal	Copyright Ã‚Â© 2013 Elsevier Ltd. All rights reserved.	S0016-2361(13)00370-0	84878873341	2-s2.0-84878873341	Hydrotreatment of glycerol (a byproduct of bio-diesel production) was conducted in the presence of a number of different supported metal catalysts at a temperature of 300Ã‚Â°C under 5MPa initial pressure...	NA	NA	NA	Glycerol | Hydro-treatment | Bio-oil | Supported metal catalysts | Phenol	NA	glycerol
140	1-s2.0-S0016236113003700	TRUE	DOI:10.1016/j.fuel.2013.04.069	https://api.elsevier.com/content/article/pii/S0016236113003700	Direct conversion of glycerol into bio-oil via hydrotreatment using supported metal catalysts	Matthew, Tymchyshyn	Abstract Hydrotreatment of glycerol (a byproduct of bio-diesel production) was conducted in the presence of a number of different supported metal catalysts at a temperature of 300Ã‚Â°C under 5MPa initial pressure of H2. The bio-oil products were comprehensively characterized to determine their physical/chemical properties. Experiments with supported catalyst metals revealed a positive correlation…	Fuel	NA	162361	112	NA	2013-10-01	2013-10-01	193	202	10.1016/j.fuel.2013.04.069	0	FALSE	FALSE	NA	Journal	Copyright Ã‚Â© 2013 Elsevier Ltd. All rights reserved.	S0016-2361(13)00370-0	84878873341	2-s2.0-84878873341	Hydrotreatment of glycerol (a byproduct of bio-diesel production) was conducted in the presence of a number of different supported metal catalysts at a temperature of 300Ã‚Â°C under 5MPa initial pressure...	NA	NA	NA	Glycerol | Hydro-treatment | Bio-oil | Supported metal catalysts | Phenol	NA	substituted_phenols
141	1-s2.0-S0016236113004055	TRUE	DOI:10.1016/j.fuel.2013.05.005	https://api.elsevier.com/content/article/pii/S0016236113004055	Energy valorisation of crude glycerol and corn straw by means of slow co-pyrolysis: Production and characterisation of gas, char and bio-oil	RaÃƒÂºl, Delgado	Abstract In recent years the amount of crude glycerol, by product of the biodiesel production process, has been increasing as a result of the high demand of biodiesel. Developing new processes for crude glycerol revalorization could make the biodiesel production process more profitable. An alternative use of crude glycerol by means of a co-pyrolysis with corn straw is studied at the following rat…	Fuel	NA	162361	112	NA	2013-10-01	2013-10-01	31	37	10.1016/j.fuel.2013.05.005	0	FALSE	FALSE	NA	Journal	Copyright Ã‚Â© 2013 Elsevier Ltd. All rights reserved.	S0016-2361(13)00405-5	84878532181	2-s2.0-84878532181	In recent years the amount of crude glycerol, by product of the biodiesel production process, has been increasing as a result of the high demand of biodiesel. Developing new processes for crude glycerol...	NA	NA	NA	Co-pyrolysis | Glycerol | Corn-straw | Gas | Bio-oil	NA	biodiesel
142	1-s2.0-S0016236113004055	TRUE	DOI:10.1016/j.fuel.2013.05.005	https://api.elsevier.com/content/article/pii/S0016236113004055	Energy valorisation of crude glycerol and corn straw by means of slow co-pyrolysis: Production and characterisation of gas, char and bio-oil	RaÃƒÂºl, Delgado	Abstract In recent years the amount of crude glycerol, by product of the biodiesel production process, has been increasing as a result of the high demand of biodiesel. Developing new processes for crude glycerol revalorization could make the biodiesel production process more profitable. An alternative use of crude glycerol by means of a co-pyrolysis with corn straw is studied at the following rat…	Fuel	NA	162361	112	NA	2013-10-01	2013-10-01	31	37	10.1016/j.fuel.2013.05.005	0	FALSE	FALSE	NA	Journal	Copyright Ã‚Â© 2013 Elsevier Ltd. All rights reserved.	S0016-2361(13)00405-5	84878532181	2-s2.0-84878532181	In recent years the amount of crude glycerol, by product of the biodiesel production process, has been increasing as a result of the high demand of biodiesel. Developing new processes for crude glycerol...	NA	NA	NA	Co-pyrolysis | Glycerol | Corn-straw | Gas | Bio-oil	NA	glycerol
143	1-s2.0-S0016236113009095	TRUE	DOI:10.1016/j.fuel.2013.09.066	https://api.elsevier.com/content/article/pii/S0016236113009095	Thermodynamic and kinetic studies of a catalytic process to convert glycerol into solketal as an oxygenated fuel additive	Malaya R., Nanda	Abstract Glycerol is a byproduct of biodiesel industry and can be converted into high value-added applications. The heterogeneous ketalization of glycerol with acetone was conducted over a solid acid catalyst of Amberlyst-35 in a batch reactor. The thermodynamics and kinetics of the ketalization reaction for the synthesis of solketal were investigated. The reaction equilibrium constants were dete…	Fuel	NA	162361	117	NA	2014-01-30	2014-01-30	470	477	10.1016/j.fuel.2013.09.066	0	FALSE	FALSE	NA	Journal	Copyright Ã‚Â© 2013 Elsevier Ltd. All rights reserved.	S0016-2361(13)00909-5	84886526357	2-s2.0-84886526357	Glycerol is a byproduct of biodiesel industry and can be converted into high value-added applications. The heterogeneous ketalization of glycerol with acetone was conducted over a solid acid catalyst...	NA	NA	NA	Adsorption | Batch reactor | Glycerol | Ion exchange resin | Kinetics	NA	glycerol
144	1-s2.0-S0016236113009095	TRUE	DOI:10.1016/j.fuel.2013.09.066	https://api.elsevier.com/content/article/pii/S0016236113009095	Thermodynamic and kinetic studies of a catalytic process to convert glycerol into solketal as an oxygenated fuel additive	Malaya R., Nanda	Abstract Glycerol is a byproduct of biodiesel industry and can be converted into high value-added applications. The heterogeneous ketalization of glycerol with acetone was conducted over a solid acid catalyst of Amberlyst-35 in a batch reactor. The thermodynamics and kinetics of the ketalization reaction for the synthesis of solketal were investigated. The reaction equilibrium constants were dete…	Fuel	NA	162361	117	NA	2014-01-30	2014-01-30	470	477	10.1016/j.fuel.2013.09.066	0	FALSE	FALSE	NA	Journal	Copyright Ã‚Â© 2013 Elsevier Ltd. All rights reserved.	S0016-2361(13)00909-5	84886526357	2-s2.0-84886526357	Glycerol is a byproduct of biodiesel industry and can be converted into high value-added applications. The heterogeneous ketalization of glycerol with acetone was conducted over a solid acid catalyst...	NA	NA	NA	Adsorption | Batch reactor | Glycerol | Ion exchange resin | Kinetics	NA	pharmaceutical
145	1-s2.0-S0016236113009095	TRUE	DOI:10.1016/j.fuel.2013.09.066	https://api.elsevier.com/content/article/pii/S0016236113009095	Thermodynamic and kinetic studies of a catalytic process to convert glycerol into solketal as an oxygenated fuel additive	Malaya R., Nanda	Abstract Glycerol is a byproduct of biodiesel industry and can be converted into high value-added applications. The heterogeneous ketalization of glycerol with acetone was conducted over a solid acid catalyst of Amberlyst-35 in a batch reactor. The thermodynamics and kinetics of the ketalization reaction for the synthesis of solketal were investigated. The reaction equilibrium constants were dete…	Fuel	NA	162361	117	NA	2014-01-30	2014-01-30	470	477	10.1016/j.fuel.2013.09.066	0	FALSE	FALSE	NA	Journal	Copyright Ã‚Â© 2013 Elsevier Ltd. All rights reserved.	S0016-2361(13)00909-5	84886526357	2-s2.0-84886526357	Glycerol is a byproduct of biodiesel industry and can be converted into high value-added applications. The heterogeneous ketalization of glycerol with acetone was conducted over a solid acid catalyst...	NA	NA	NA	Adsorption | Batch reactor | Glycerol | Ion exchange resin | Kinetics	NA	acetone
146	1-s2.0-S0016236113009095	TRUE	DOI:10.1016/j.fuel.2013.09.066	https://api.elsevier.com/content/article/pii/S0016236113009095	Thermodynamic and kinetic studies of a catalytic process to convert glycerol into solketal as an oxygenated fuel additive	Malaya R., Nanda	Abstract Glycerol is a byproduct of biodiesel industry and can be converted into high value-added applications. The heterogeneous ketalization of glycerol with acetone was conducted over a solid acid catalyst of Amberlyst-35 in a batch reactor. The thermodynamics and kinetics of the ketalization reaction for the synthesis of solketal were investigated. The reaction equilibrium constants were dete…	Fuel	NA	162361	117	NA	2014-01-30	2014-01-30	470	477	10.1016/j.fuel.2013.09.066	0	FALSE	FALSE	NA	Journal	Copyright Ã‚Â© 2013 Elsevier Ltd. All rights reserved.	S0016-2361(13)00909-5	84886526357	2-s2.0-84886526357	Glycerol is a byproduct of biodiesel industry and can be converted into high value-added applications. The heterogeneous ketalization of glycerol with acetone was conducted over a solid acid catalyst...	NA	NA	NA	Adsorption | Batch reactor | Glycerol | Ion exchange resin | Kinetics	NA	solketal
147	1-s2.0-S0016236113009460	TRUE	DOI:10.1016/j.fuel.2013.10.005	https://api.elsevier.com/content/article/pii/S0016236113009460	Occurrence and sources of zinc in fuels	Frida, Jones	Abstract Several studies have shown that the presence of high amounts of Zn, in addition to other elements, in fuels can be a cause of operational difficulties during combustion due to corrosion and slagging and can also cause environmental and health problems due to emissions. In nature, Zn is an essential micronutrient for humans, animals and plants, but in excessive amounts it becomes toxic. T…	Fuel	NA	162361	117	NA	2014-01-30	2014-01-30	763	775	10.1016/j.fuel.2013.10.005	0	FALSE	FALSE	NA	Journal	Copyright Ã‚Â© 2013 Elsevier Ltd. All rights reserved.	S0016-2361(13)00946-0	84887100254	2-s2.0-84887100254	Several studies have shown that the presence of high amounts of Zn, in addition to other elements, in fuels can be a cause of operational difficulties during combustion due to corrosion and slagging...	NA	NA	Review article	Zinc content | Waste | Biomass | Coal | Oil	NA	organic_housewaste
148	1-s2.0-S0016236113009460	TRUE	DOI:10.1016/j.fuel.2013.10.005	https://api.elsevier.com/content/article/pii/S0016236113009460	Occurrence and sources of zinc in fuels	Frida, Jones	Abstract Several studies have shown that the presence of high amounts of Zn, in addition to other elements, in fuels can be a cause of operational difficulties during combustion due to corrosion and slagging and can also cause environmental and health problems due to emissions. In nature, Zn is an essential micronutrient for humans, animals and plants, but in excessive amounts it becomes toxic. T…	Fuel	NA	162361	117	NA	2014-01-30	2014-01-30	763	775	10.1016/j.fuel.2013.10.005	0	FALSE	FALSE	NA	Journal	Copyright Ã‚Â© 2013 Elsevier Ltd. All rights reserved.	S0016-2361(13)00946-0	84887100254	2-s2.0-84887100254	Several studies have shown that the presence of high amounts of Zn, in addition to other elements, in fuels can be a cause of operational difficulties during combustion due to corrosion and slagging...	NA	NA	Review article	Zinc content | Waste | Biomass | Coal | Oil	NA	dedicated_combustion_/_incineration
149	1-s2.0-S0016236113009630	TRUE	DOI:10.1016/j.fuel.2013.10.022	https://api.elsevier.com/content/article/pii/S0016236113009630	Production of the glycerol-impregnated hybrid coal and its characterization	Jong-Soo, Bae	Abstract Biomass recently has been blended with fossil fuels for the environment-friendly aspect such as reduction of carbon dioxide emissions. However, in coal-fired power plants, bituminous coal is blended with only the solid-phase biomass like wood chips for use of the existing coal feeding facility. Furthermore, as coal and biomass individually combust, it is difficult to use the existing coa…	Fuel	NA	162361	118	NA	2014-02-15	2014-02-15	33	40	10.1016/j.fuel.2013.10.022	0	FALSE	FALSE	NA	Journal	Copyright Ã‚Â© 2013 Elsevier Ltd. All rights reserved.	S0016-2361(13)00963-0	84888317126	2-s2.0-84888317126	Biomass recently has been blended with fossil fuels for the environment-friendly aspect such as reduction of carbon dioxide emissions. However, in coal-fired power plants, bituminous coal is blended...	NA	NA	NA	Glycerol | Liquid biomass | Co-combustion | Low rank coal | Glycerol-impregnated hybrid coal	NA	glycerol
150	1-s2.0-S0016236114000477	TRUE	DOI:10.1016/j.fuel.2014.01.037	https://api.elsevier.com/content/article/pii/S0016236114000477	Effects of heterogeneous catalyst in hydrothermal liquefaction of dried distillers grains with solubles	Per Runge, Christensen	Abstract Hydrothermal liquefaction of biomass is a promising technology for production of biofuels. In this work, the catalytic effect of a nanocrystalline zirconia catalyst on hydrothermal liquefaction of dried distillerÃ¢â‚¬â„¢s grains with solubles (DDGS) was investigated using a stop-flow reactor system. Additionally, the catalytic effects originating from the reactor wall were also studied b…	Fuel	NA	162361	123	NA	2014-05-01	2014-05-01	158	166	10.1016/j.fuel.2014.01.037	0	FALSE	FALSE	NA	Journal	Copyright Ã‚Â© 2014 Elsevier Ltd. All rights reserved.	S0016-2361(14)00047-7	84894090583	2-s2.0-84894090583	Hydrothermal liquefaction of biomass is a promising technology for production of biofuels. In this work, the catalytic effect of a nanocrystalline zirconia catalyst on hydrothermal liquefaction of dried...	NA	NA	NA	Hydrothermal liquefaction | Catalytic effect | Zirconia | Biofuel | Distillers grains	NA	pyrolysis_oil
151	1-s2.0-S0016236114000477	TRUE	DOI:10.1016/j.fuel.2014.01.037	https://api.elsevier.com/content/article/pii/S0016236114000477	Effects of heterogeneous catalyst in hydrothermal liquefaction of dried distillers grains with solubles	Per Runge, Christensen	Abstract Hydrothermal liquefaction of biomass is a promising technology for production of biofuels. In this work, the catalytic effect of a nanocrystalline zirconia catalyst on hydrothermal liquefaction of dried distillerÃ¢â‚¬â„¢s grains with solubles (DDGS) was investigated using a stop-flow reactor system. Additionally, the catalytic effects originating from the reactor wall were also studied b…	Fuel	NA	162361	123	NA	2014-05-01	2014-05-01	158	166	10.1016/j.fuel.2014.01.037	0	FALSE	FALSE	NA	Journal	Copyright Ã‚Â© 2014 Elsevier Ltd. All rights reserved.	S0016-2361(14)00047-7	84894090583	2-s2.0-84894090583	Hydrothermal liquefaction of biomass is a promising technology for production of biofuels. In this work, the catalytic effect of a nanocrystalline zirconia catalyst on hydrothermal liquefaction of dried...	NA	NA	NA	Hydrothermal liquefaction | Catalytic effect | Zirconia | Biofuel | Distillers grains	NA	distillers_grains
152	1-s2.0-S0016236114003433	TRUE	DOI:10.1016/j.fuel.2014.04.022	https://api.elsevier.com/content/article/pii/S0016236114003433	Characterization of the physical and chemical properties of the distillate fractions of crude bio-oil produced by the glycerol-assisted liquefaction of swine manure	Dan, Cheng	Abstract The distillation curves of crude bio-oil from glycerol-assisted hydrothermal liquefaction of swine manure were measured. The crude bio-oil had much higher distillation temperature than diesel and gasoline. Ninety percentage of the crude bio-oil was recovered at a distillation temperature of 498.8Ã‚Â°C, compared to 350.4Ã‚Â°C for diesel and 177.8Ã‚Â°C for gasoline. The remaining 10% of th…	Fuel	NA	162361	130	NA	2014-08-15	2014-08-15	251	256	10.1016/j.fuel.2014.04.022	0	FALSE	FALSE	NA	Journal	Copyright Ã‚Â© 2014 Elsevier Ltd. All rights reserved.	S0016-2361(14)00343-3	84899790556	2-s2.0-84899790556	The distillation curves of crude bio-oil from glycerol-assisted hydrothermal liquefaction of swine manure were measured. The crude bio-oil had much higher distillation temperature than diesel and gasoline....	NA	NA	NA	Bio-oil | Glycerol-assisted liquefaction | Swine manure | Distillation curves	NA	maize_stover
153	1-s2.0-S0016236114003433	TRUE	DOI:10.1016/j.fuel.2014.04.022	https://api.elsevier.com/content/article/pii/S0016236114003433	Characterization of the physical and chemical properties of the distillate fractions of crude bio-oil produced by the glycerol-assisted liquefaction of swine manure	Dan, Cheng	Abstract The distillation curves of crude bio-oil from glycerol-assisted hydrothermal liquefaction of swine manure were measured. The crude bio-oil had much higher distillation temperature than diesel and gasoline. Ninety percentage of the crude bio-oil was recovered at a distillation temperature of 498.8Ã‚Â°C, compared to 350.4Ã‚Â°C for diesel and 177.8Ã‚Â°C for gasoline. The remaining 10% of th…	Fuel	NA	162361	130	NA	2014-08-15	2014-08-15	251	256	10.1016/j.fuel.2014.04.022	0	FALSE	FALSE	NA	Journal	Copyright Ã‚Â© 2014 Elsevier Ltd. All rights reserved.	S0016-2361(14)00343-3	84899790556	2-s2.0-84899790556	The distillation curves of crude bio-oil from glycerol-assisted hydrothermal liquefaction of swine manure were measured. The crude bio-oil had much higher distillation temperature than diesel and gasoline....	NA	NA	NA	Bio-oil | Glycerol-assisted liquefaction | Swine manure | Distillation curves	NA	biogasoline
154	1-s2.0-S0016236114003433	TRUE	DOI:10.1016/j.fuel.2014.04.022	https://api.elsevier.com/content/article/pii/S0016236114003433	Characterization of the physical and chemical properties of the distillate fractions of crude bio-oil produced by the glycerol-assisted liquefaction of swine manure	Dan, Cheng	Abstract The distillation curves of crude bio-oil from glycerol-assisted hydrothermal liquefaction of swine manure were measured. The crude bio-oil had much higher distillation temperature than diesel and gasoline. Ninety percentage of the crude bio-oil was recovered at a distillation temperature of 498.8Ã‚Â°C, compared to 350.4Ã‚Â°C for diesel and 177.8Ã‚Â°C for gasoline. The remaining 10% of th…	Fuel	NA	162361	130	NA	2014-08-15	2014-08-15	251	256	10.1016/j.fuel.2014.04.022	0	FALSE	FALSE	NA	Journal	Copyright Ã‚Â© 2014 Elsevier Ltd. All rights reserved.	S0016-2361(14)00343-3	84899790556	2-s2.0-84899790556	The distillation curves of crude bio-oil from glycerol-assisted hydrothermal liquefaction of swine manure were measured. The crude bio-oil had much higher distillation temperature than diesel and gasoline....	NA	NA	NA	Bio-oil | Glycerol-assisted liquefaction | Swine manure | Distillation curves	NA	glycerol
155	1-s2.0-S0016236114003433	TRUE	DOI:10.1016/j.fuel.2014.04.022	https://api.elsevier.com/content/article/pii/S0016236114003433	Characterization of the physical and chemical properties of the distillate fractions of crude bio-oil produced by the glycerol-assisted liquefaction of swine manure	Dan, Cheng	Abstract The distillation curves of crude bio-oil from glycerol-assisted hydrothermal liquefaction of swine manure were measured. The crude bio-oil had much higher distillation temperature than diesel and gasoline. Ninety percentage of the crude bio-oil was recovered at a distillation temperature of 498.8Ã‚Â°C, compared to 350.4Ã‚Â°C for diesel and 177.8Ã‚Â°C for gasoline. The remaining 10% of th…	Fuel	NA	162361	130	NA	2014-08-15	2014-08-15	251	256	10.1016/j.fuel.2014.04.022	0	FALSE	FALSE	NA	Journal	Copyright Ã‚Â© 2014 Elsevier Ltd. All rights reserved.	S0016-2361(14)00343-3	84899790556	2-s2.0-84899790556	The distillation curves of crude bio-oil from glycerol-assisted hydrothermal liquefaction of swine manure were measured. The crude bio-oil had much higher distillation temperature than diesel and gasoline....	NA	NA	NA	Bio-oil | Glycerol-assisted liquefaction | Swine manure | Distillation curves	NA	pig_manure
156	1-s2.0-S0016236114005365	TRUE	DOI:10.1016/j.fuel.2014.05.074	https://api.elsevier.com/content/article/pii/S0016236114005365	Bioconversion of food waste to energy: A review	Esra, UÃƒÂ§kun Kiran	Abstract According to Food and Agricultural Organization (FAO), one third of food produced globally for human consumption is lost along the food supply chain. In many countries food waste are currently landfilled or incinerated together with other combustible municipal wastes for possible recovery of energy. However, these two approaches are facing more and more economic and environmental stresse…	Fuel	NA	162361	134	NA	2014-10-15	2014-10-15	389	399	10.1016/j.fuel.2014.05.074	0	FALSE	FALSE	NA	Journal	Copyright Ã‚Â© 2014 Elsevier Ltd. All rights reserved.	S0016-2361(14)00536-5	84903195551	2-s2.0-84903195551	According to Food and Agricultural Organization (FAO), one third of food produced globally for human consumption is lost along the food supply chain. In many countries food waste are currently landfilled...	NA	NA	Review article	Food waste | Biofuel | Ethanol | Methane | Hydrogen	NA	food_leftovers
157	1-s2.0-S0016236114005365	TRUE	DOI:10.1016/j.fuel.2014.05.074	https://api.elsevier.com/content/article/pii/S0016236114005365	Bioconversion of food waste to energy: A review	Esra, UÃƒÂ§kun Kiran	Abstract According to Food and Agricultural Organization (FAO), one third of food produced globally for human consumption is lost along the food supply chain. In many countries food waste are currently landfilled or incinerated together with other combustible municipal wastes for possible recovery of energy. However, these two approaches are facing more and more economic and environmental stresse…	Fuel	NA	162361	134	NA	2014-10-15	2014-10-15	389	399	10.1016/j.fuel.2014.05.074	0	FALSE	FALSE	NA	Journal	Copyright Ã‚Â© 2014 Elsevier Ltd. All rights reserved.	S0016-2361(14)00536-5	84903195551	2-s2.0-84903195551	According to Food and Agricultural Organization (FAO), one third of food produced globally for human consumption is lost along the food supply chain. In many countries food waste are currently landfilled...	NA	NA	Review article	Food waste | Biofuel | Ethanol | Methane | Hydrogen	NA	ethanol_/_bioethanol
158	1-s2.0-S0016236114005365	TRUE	DOI:10.1016/j.fuel.2014.05.074	https://api.elsevier.com/content/article/pii/S0016236114005365	Bioconversion of food waste to energy: A review	Esra, UÃƒÂ§kun Kiran	Abstract According to Food and Agricultural Organization (FAO), one third of food produced globally for human consumption is lost along the food supply chain. In many countries food waste are currently landfilled or incinerated together with other combustible municipal wastes for possible recovery of energy. However, these two approaches are facing more and more economic and environmental stresse…	Fuel	NA	162361	134	NA	2014-10-15	2014-10-15	389	399	10.1016/j.fuel.2014.05.074	0	FALSE	FALSE	NA	Journal	Copyright Ã‚Â© 2014 Elsevier Ltd. All rights reserved.	S0016-2361(14)00536-5	84903195551	2-s2.0-84903195551	According to Food and Agricultural Organization (FAO), one third of food produced globally for human consumption is lost along the food supply chain. In many countries food waste are currently landfilled...	NA	NA	Review article	Food waste | Biofuel | Ethanol | Methane | Hydrogen	NA	biodiesel
159	1-s2.0-S0016236114005511	TRUE	DOI:10.1016/j.fuel.2014.05.089	https://api.elsevier.com/content/article/pii/S0016236114005511	Lipid production from Trichosporon oleaginosus cultivated with pre-treated secondary wastewater sludge	Xiaolei, Zhang	Abstract Wastewater sludge contains most of the nutrients required for growth of microorganism. In this study, thermal and chemical (acidic and alkaline)-thermal treatments were applied to different sludge suspended solids concentrations (10Ã¢â‚¬â€œ30g/L) and the pre-treated sludge was used as raw material for lipid production by Trichosporon oleaginosus. The results showed that compared to 48h w…	Fuel	NA	162361	134	NA	2014-10-15	2014-10-15	274	282	10.1016/j.fuel.2014.05.089	0	FALSE	FALSE	NA	Journal	Copyright Ã‚Â© 2014 Elsevier Ltd. All rights reserved.	S0016-2361(14)00551-1	84903309439	2-s2.0-84903309439	Wastewater sludge contains most of the nutrients required for growth of microorganism. In this study, thermal and chemical (acidic and alkaline)-thermal treatments were applied to different sludge suspended...	NA	NA	NA	Wastewater sludge | Lipid accumulation | Sludge pre-treatment | Struvite formation	NA	biodiesel
160	1-s2.0-S0016236114005511	TRUE	DOI:10.1016/j.fuel.2014.05.089	https://api.elsevier.com/content/article/pii/S0016236114005511	Lipid production from Trichosporon oleaginosus cultivated with pre-treated secondary wastewater sludge	Xiaolei, Zhang	Abstract Wastewater sludge contains most of the nutrients required for growth of microorganism. In this study, thermal and chemical (acidic and alkaline)-thermal treatments were applied to different sludge suspended solids concentrations (10Ã¢â‚¬â€œ30g/L) and the pre-treated sludge was used as raw material for lipid production by Trichosporon oleaginosus. The results showed that compared to 48h w…	Fuel	NA	162361	134	NA	2014-10-15	2014-10-15	274	282	10.1016/j.fuel.2014.05.089	0	FALSE	FALSE	NA	Journal	Copyright Ã‚Â© 2014 Elsevier Ltd. All rights reserved.	S0016-2361(14)00551-1	84903309439	2-s2.0-84903309439	Wastewater sludge contains most of the nutrients required for growth of microorganism. In this study, thermal and chemical (acidic and alkaline)-thermal treatments were applied to different sludge suspended...	NA	NA	NA	Wastewater sludge | Lipid accumulation | Sludge pre-treatment | Struvite formation	NA	wastewaster_sludge
161	1-s2.0-S0016236114006152	TRUE	DOI:10.1016/j.fuel.2014.06.049	https://api.elsevier.com/content/article/pii/S0016236114006152	New approach of catalyst-free biodiesel production from canola oil in supercritical tert-butyl methyl ether (MTBE)	Obie, Farobie	Abstract This paper reports a novel approach for biodiesel production from canola oil in supercritical tert-butyl methyl ether (MTBE) without the addition of a catalyst. Using this technique, canola oil was reacted with MTBE to generate fatty acid methyl esters (FAMEs) and glycerol tert-butyl ether. No glycerol was obtained as a by-product in this reaction. The effects of temperature, pressure, a…	Fuel	NA	162361	135	NA	2014-11-01	2014-11-01	172	181	10.1016/j.fuel.2014.06.049	0	FALSE	FALSE	NA	Journal	Copyright Ã‚Â© 2014 Elsevier Ltd. All rights reserved.	S0016-2361(14)00615-2	84904325684	2-s2.0-84904325684	This paper reports a novel approach for biodiesel production from canola oil in supercritical tert-butyl methyl ether (MTBE) without the addition of a catalyst. Using this technique, canola oil was...	NA	NA	NA	Biomass | Biodiesel | Canola oil | Supercritical condition | Tert-butyl methyl ether	NA	glycerol
162	1-s2.0-S0016236114006152	TRUE	DOI:10.1016/j.fuel.2014.06.049	https://api.elsevier.com/content/article/pii/S0016236114006152	New approach of catalyst-free biodiesel production from canola oil in supercritical tert-butyl methyl ether (MTBE)	Obie, Farobie	Abstract This paper reports a novel approach for biodiesel production from canola oil in supercritical tert-butyl methyl ether (MTBE) without the addition of a catalyst. Using this technique, canola oil was reacted with MTBE to generate fatty acid methyl esters (FAMEs) and glycerol tert-butyl ether. No glycerol was obtained as a by-product in this reaction. The effects of temperature, pressure, a…	Fuel	NA	162361	135	NA	2014-11-01	2014-11-01	172	181	10.1016/j.fuel.2014.06.049	0	FALSE	FALSE	NA	Journal	Copyright Ã‚Â© 2014 Elsevier Ltd. All rights reserved.	S0016-2361(14)00615-2	84904325684	2-s2.0-84904325684	This paper reports a novel approach for biodiesel production from canola oil in supercritical tert-butyl methyl ether (MTBE) without the addition of a catalyst. Using this technique, canola oil was...	NA	NA	NA	Biomass | Biodiesel | Canola oil | Supercritical condition | Tert-butyl methyl ether	NA	mtbe
163	1-s2.0-S001623611400828X	TRUE	DOI:10.1016/j.fuel.2014.08.050	https://api.elsevier.com/content/article/pii/S001623611400828X	Compact NMR spectroscopy for real-time monitoring of a biodiesel production	M.H.M., Killner	Abstract The use of biodiesel shows innumerous advantages compared to fossil fuels, since biodiesel is a biodegradable and non-toxic fuel. Nowadays, most of the biodiesel commercialized in the world is produced by the transesterification reaction of vegetable oils with methanol and basic catalysis. Understanding the reaction kinetics and controlling its optimum progress for improving the quality …	Fuel	NA	162361	139	NA	2015-01-01	2015-01-01	240	247	10.1016/j.fuel.2014.08.050	1	TRUE	FALSE	http://www.elsevier.com/open-access/userlicense/1.0/	Journal	Copyright Ã‚Â© 2014 Elsevier Ltd.	S0016-2361(14)00828-X	84907191997	2-s2.0-84907191997	The use of biodiesel shows innumerous advantages compared to fossil fuels, since biodiesel is a biodegradable and non-toxic fuel. Nowadays, most of the biodiesel commercialized in the world is produced...	NA	NA	NA	Low-field NMR | Biodiesel | Reaction monitoring | Chemometrics | Transesterification reaction	NA	biodiesel
164	1-s2.0-S001623611400828X	TRUE	DOI:10.1016/j.fuel.2014.08.050	https://api.elsevier.com/content/article/pii/S001623611400828X	Compact NMR spectroscopy for real-time monitoring of a biodiesel production	M.H.M., Killner	Abstract The use of biodiesel shows innumerous advantages compared to fossil fuels, since biodiesel is a biodegradable and non-toxic fuel. Nowadays, most of the biodiesel commercialized in the world is produced by the transesterification reaction of vegetable oils with methanol and basic catalysis. Understanding the reaction kinetics and controlling its optimum progress for improving the quality …	Fuel	NA	162361	139	NA	2015-01-01	2015-01-01	240	247	10.1016/j.fuel.2014.08.050	1	TRUE	FALSE	http://www.elsevier.com/open-access/userlicense/1.0/	Journal	Copyright Ã‚Â© 2014 Elsevier Ltd.	S0016-2361(14)00828-X	84907191997	2-s2.0-84907191997	The use of biodiesel shows innumerous advantages compared to fossil fuels, since biodiesel is a biodegradable and non-toxic fuel. Nowadays, most of the biodiesel commercialized in the world is produced...	NA	NA	NA	Low-field NMR | Biodiesel | Reaction monitoring | Chemometrics | Transesterification reaction	NA	methanol
165	1-s2.0-S001623611400828X	TRUE	DOI:10.1016/j.fuel.2014.08.050	https://api.elsevier.com/content/article/pii/S001623611400828X	Compact NMR spectroscopy for real-time monitoring of a biodiesel production	M.H.M., Killner	Abstract The use of biodiesel shows innumerous advantages compared to fossil fuels, since biodiesel is a biodegradable and non-toxic fuel. Nowadays, most of the biodiesel commercialized in the world is produced by the transesterification reaction of vegetable oils with methanol and basic catalysis. Understanding the reaction kinetics and controlling its optimum progress for improving the quality …	Fuel	NA	162361	139	NA	2015-01-01	2015-01-01	240	247	10.1016/j.fuel.2014.08.050	1	TRUE	FALSE	http://www.elsevier.com/open-access/userlicense/1.0/	Journal	Copyright Ã‚Â© 2014 Elsevier Ltd.	S0016-2361(14)00828-X	84907191997	2-s2.0-84907191997	The use of biodiesel shows innumerous advantages compared to fossil fuels, since biodiesel is a biodegradable and non-toxic fuel. Nowadays, most of the biodiesel commercialized in the world is produced...	NA	NA	NA	Low-field NMR | Biodiesel | Reaction monitoring | Chemometrics | Transesterification reaction	NA	glycerol
166	1-s2.0-S0016236114009144	TRUE	DOI:10.1016/j.fuel.2014.09.045	https://api.elsevier.com/content/article/pii/S0016236114009144	Effects of experimental conditions and of addition of natural minerals on syngas production from lignin by oxy-gasification: Comparison of bench- and pilot scale gasification	Filomena, Pinto	Abstract Gasification of spent lignin pellets was used to obtain a gas suitable for energy production. Spent lignin was obtained from second-generation cellulosic ethanol demo plant using wheat straw as feedstock. Gasification of lignin did not give rise to any feeding problems, thus no significant changes were needed in the existing gasification installation. The rise of temperature and steam fl…	Fuel	NA	162361	140	NA	2015-01-15	2015-01-15	62	72	10.1016/j.fuel.2014.09.045	0	FALSE	FALSE	NA	Journal	Copyright Ã‚Â© 2014 Elsevier Ltd. All rights reserved.	S0016-2361(14)00914-4	84908032688	2-s2.0-84908032688	Gasification of spent lignin pellets was used to obtain a gas suitable for energy production. Spent lignin was obtained from second-generation cellulosic ethanol demo plant using wheat straw as feedstock....	NA	NA	NA	Gasification | Lignin | Tar abatement | Gaseous hydrocarbons abatement	NA	syngas
167	1-s2.0-S0016236114009144	TRUE	DOI:10.1016/j.fuel.2014.09.045	https://api.elsevier.com/content/article/pii/S0016236114009144	Effects of experimental conditions and of addition of natural minerals on syngas production from lignin by oxy-gasification: Comparison of bench- and pilot scale gasification	Filomena, Pinto	Abstract Gasification of spent lignin pellets was used to obtain a gas suitable for energy production. Spent lignin was obtained from second-generation cellulosic ethanol demo plant using wheat straw as feedstock. Gasification of lignin did not give rise to any feeding problems, thus no significant changes were needed in the existing gasification installation. The rise of temperature and steam fl…	Fuel	NA	162361	140	NA	2015-01-15	2015-01-15	62	72	10.1016/j.fuel.2014.09.045	0	FALSE	FALSE	NA	Journal	Copyright Ã‚Â© 2014 Elsevier Ltd. All rights reserved.	S0016-2361(14)00914-4	84908032688	2-s2.0-84908032688	Gasification of spent lignin pellets was used to obtain a gas suitable for energy production. Spent lignin was obtained from second-generation cellulosic ethanol demo plant using wheat straw as feedstock....	NA	NA	NA	Gasification | Lignin | Tar abatement | Gaseous hydrocarbons abatement	NA	wheat_straw
168	1-s2.0-S0016236114009958	TRUE	DOI:10.1016/j.fuel.2014.09.120	https://api.elsevier.com/content/article/pii/S0016236114009958	A study on torrefaction of food waste	Jeeban, Poudel	Abstract Torrefaction of biomass under anoxic condition can produce an energy dense and consistent quality solid biomass fuel for combustion and co-firing applications. This paper investigates the fuel characteristics of food waste at torrefaction temperatures ranging from 150 to 600Ã‚Â°C, for torrefaction residence time varying from 0 to 50min in a horizontal tubular reactor. The torrefied produ…	Fuel	NA	162361	140	NA	2015-01-15	2015-01-15	275	281	10.1016/j.fuel.2014.09.120	0	FALSE	FALSE	NA	Journal	Copyright Ã‚Â© 2014 Elsevier Ltd. All rights reserved.	S0016-2361(14)00995-8	84908577516	2-s2.0-84908577516	Torrefaction of biomass under anoxic condition can produce an energy dense and consistent quality solid biomass fuel for combustion and co-firing applications. This paper investigates the fuel characteristics...	NA	NA	NA	Food wood | Torrefaction | Energy yield | Mass yield | Elemental analysis	NA	dedicated_combustion_/_incineration
169	1-s2.0-S0016236114009958	TRUE	DOI:10.1016/j.fuel.2014.09.120	https://api.elsevier.com/content/article/pii/S0016236114009958	A study on torrefaction of food waste	Jeeban, Poudel	Abstract Torrefaction of biomass under anoxic condition can produce an energy dense and consistent quality solid biomass fuel for combustion and co-firing applications. This paper investigates the fuel characteristics of food waste at torrefaction temperatures ranging from 150 to 600Ã‚Â°C, for torrefaction residence time varying from 0 to 50min in a horizontal tubular reactor. The torrefied produ…	Fuel	NA	162361	140	NA	2015-01-15	2015-01-15	275	281	10.1016/j.fuel.2014.09.120	0	FALSE	FALSE	NA	Journal	Copyright Ã‚Â© 2014 Elsevier Ltd. All rights reserved.	S0016-2361(14)00995-8	84908577516	2-s2.0-84908577516	Torrefaction of biomass under anoxic condition can produce an energy dense and consistent quality solid biomass fuel for combustion and co-firing applications. This paper investigates the fuel characteristics...	NA	NA	NA	Food wood | Torrefaction | Energy yield | Mass yield | Elemental analysis	NA	torrefaction
170	1-s2.0-S0016236114009958	TRUE	DOI:10.1016/j.fuel.2014.09.120	https://api.elsevier.com/content/article/pii/S0016236114009958	A study on torrefaction of food waste	Jeeban, Poudel	Abstract Torrefaction of biomass under anoxic condition can produce an energy dense and consistent quality solid biomass fuel for combustion and co-firing applications. This paper investigates the fuel characteristics of food waste at torrefaction temperatures ranging from 150 to 600Ã‚Â°C, for torrefaction residence time varying from 0 to 50min in a horizontal tubular reactor. The torrefied produ…	Fuel	NA	162361	140	NA	2015-01-15	2015-01-15	275	281	10.1016/j.fuel.2014.09.120	0	FALSE	FALSE	NA	Journal	Copyright Ã‚Â© 2014 Elsevier Ltd. All rights reserved.	S0016-2361(14)00995-8	84908577516	2-s2.0-84908577516	Torrefaction of biomass under anoxic condition can produce an energy dense and consistent quality solid biomass fuel for combustion and co-firing applications. This paper investigates the fuel characteristics...	NA	NA	NA	Food wood | Torrefaction | Energy yield | Mass yield | Elemental analysis	NA	food_leftovers
171	1-s2.0-S001623611401045X	TRUE	DOI:10.1016/j.fuel.2014.10.050	https://api.elsevier.com/content/article/pii/S001623611401045X	Agglomeration of low rank Indian coal fines with an organic binder and the thermal behavior of the agglomerate produced: Part I	Tonkeswar, Das	Abstract In the present investigation, the low rank coal samples from North Eastern Region (NER) of India are nodulized and then carbonized in a beehive-type coke oven for their gainful utilization. Different types of binders (e.g. carboxymethyl cellulose and molasses) and an additive (lime) are used to prepare the nodules for increasing their strength and to reduce the emission of sulfur contain…	Fuel	NA	162361	147	NA	2015-05-01	2015-05-01	269	278	10.1016/j.fuel.2014.10.050	0	FALSE	FALSE	NA	Journal	Copyright Ã‚Â© 2014 Elsevier Ltd. All rights reserved.	S0016-2361(14)01045-X	84925348209	2-s2.0-84925348209	In the present investigation, the low rank coal samples from North Eastern Region (NER) of India are nodulized and then carbonized in a beehive-type coke oven for their gainful utilization. Different...	NA	NA	NA	Nodulization of coal | Indian coal | High sulfur coal | Coke | Thermal analysis	NA	sugar_beet_melasse
172	1-s2.0-S001623611401045X	TRUE	DOI:10.1016/j.fuel.2014.10.050	https://api.elsevier.com/content/article/pii/S001623611401045X	Agglomeration of low rank Indian coal fines with an organic binder and the thermal behavior of the agglomerate produced: Part I	Tonkeswar, Das	Abstract In the present investigation, the low rank coal samples from North Eastern Region (NER) of India are nodulized and then carbonized in a beehive-type coke oven for their gainful utilization. Different types of binders (e.g. carboxymethyl cellulose and molasses) and an additive (lime) are used to prepare the nodules for increasing their strength and to reduce the emission of sulfur contain…	Fuel	NA	162361	147	NA	2015-05-01	2015-05-01	269	278	10.1016/j.fuel.2014.10.050	0	FALSE	FALSE	NA	Journal	Copyright Ã‚Â© 2014 Elsevier Ltd. All rights reserved.	S0016-2361(14)01045-X	84925348209	2-s2.0-84925348209	In the present investigation, the low rank coal samples from North Eastern Region (NER) of India are nodulized and then carbonized in a beehive-type coke oven for their gainful utilization. Different...	NA	NA	NA	Nodulization of coal | Indian coal | High sulfur coal | Coke | Thermal analysis	NA	dedicated_combustion_/_incineration
173	1-s2.0-S0016236114011430	TRUE	DOI:10.1016/j.fuel.2014.11.039	https://api.elsevier.com/content/article/pii/S0016236114011430	Torrefaction of tomato industry residues	G., Toscano	Abstract The standardization is an important aspect for fuel products. Some residual biomass are highly heterogeneous making their energy use rather difficult. Torrefaction can represent an interesting process to improve the standardization and quality of the lignocellulosic biomass. In the present research torrefaction has been applied on tomato peels, an important Italian industry residue. Diff…	Fuel	NA	162361	143	NA	2015-03-01	2015-03-01	89	97	10.1016/j.fuel.2014.11.039	0	FALSE	FALSE	NA	Journal	Copyright Ã‚Â© 2014 Elsevier Ltd. All rights reserved.	S0016-2361(14)01143-0	84914125058	2-s2.0-84914125058	The standardization is an important aspect for fuel products. Some residual biomass are highly heterogeneous making their energy use rather difficult. Torrefaction can represent an interesting process...	NA	NA	NA	Torrefaction | Residues | Biomass | Bioenergy | Thermochemical process	NA	tomato_residues
174	1-s2.0-S0016236114011430	TRUE	DOI:10.1016/j.fuel.2014.11.039	https://api.elsevier.com/content/article/pii/S0016236114011430	Torrefaction of tomato industry residues	G., Toscano	Abstract The standardization is an important aspect for fuel products. Some residual biomass are highly heterogeneous making their energy use rather difficult. Torrefaction can represent an interesting process to improve the standardization and quality of the lignocellulosic biomass. In the present research torrefaction has been applied on tomato peels, an important Italian industry residue. Diff…	Fuel	NA	162361	143	NA	2015-03-01	2015-03-01	89	97	10.1016/j.fuel.2014.11.039	0	FALSE	FALSE	NA	Journal	Copyright Ã‚Â© 2014 Elsevier Ltd. All rights reserved.	S0016-2361(14)01143-0	84914125058	2-s2.0-84914125058	The standardization is an important aspect for fuel products. Some residual biomass are highly heterogeneous making their energy use rather difficult. Torrefaction can represent an interesting process...	NA	NA	NA	Torrefaction | Residues | Biomass | Bioenergy | Thermochemical process	NA	torrefaction
175	1-s2.0-S0016236115000848	TRUE	DOI:10.1016/j.fuel.2015.01.070	https://api.elsevier.com/content/article/pii/S0016236115000848	Evaluation of urban wastes as promising co-fuels for energy production Ã¢â‚¬â€œ A TG/MS study	Despina, Vamvuka	Abstract This work aimed at investigating the potential of using urban wastes and lignite mixtures for energy generation. The objective was to determine the combustion characteristics and the gaseous pollutants of indigenous lignite/urban waste (MSW, RDF, waste paper, sewage sludge, demolition wood) blends, as well as to evaluate the compatibility of each component in the blend. The experiments w…	Fuel	NA	162361	147	NA	2015-05-01	2015-05-01	170	183	10.1016/j.fuel.2015.01.070	0	FALSE	FALSE	NA	Journal	Copyright Ã‚Â© 2015 Elsevier Ltd. All rights reserved.	S0016-2361(15)00084-8	84934964801	2-s2.0-84934964801	This work aimed at investigating the potential of using urban wastes and lignite mixtures for energy generation. The objective was to determine the combustion characteristics and the gaseous pollutants...	NA	NA	NA	Combustion | TGÃ¢â‚¬â€œMS | Wastes | Lignite | Blends	NA	used_paper
176	1-s2.0-S0016236115000848	TRUE	DOI:10.1016/j.fuel.2015.01.070	https://api.elsevier.com/content/article/pii/S0016236115000848	Evaluation of urban wastes as promising co-fuels for energy production Ã¢â‚¬â€œ A TG/MS study	Despina, Vamvuka	Abstract This work aimed at investigating the potential of using urban wastes and lignite mixtures for energy generation. The objective was to determine the combustion characteristics and the gaseous pollutants of indigenous lignite/urban waste (MSW, RDF, waste paper, sewage sludge, demolition wood) blends, as well as to evaluate the compatibility of each component in the blend. The experiments w…	Fuel	NA	162361	147	NA	2015-05-01	2015-05-01	170	183	10.1016/j.fuel.2015.01.070	0	FALSE	FALSE	NA	Journal	Copyright Ã‚Â© 2015 Elsevier Ltd. All rights reserved.	S0016-2361(15)00084-8	84934964801	2-s2.0-84934964801	This work aimed at investigating the potential of using urban wastes and lignite mixtures for energy generation. The objective was to determine the combustion characteristics and the gaseous pollutants...	NA	NA	NA	Combustion | TGÃ¢â‚¬â€œMS | Wastes | Lignite | Blends	NA	dedicated_combustion_/_incineration
177	1-s2.0-S0016236115000848	TRUE	DOI:10.1016/j.fuel.2015.01.070	https://api.elsevier.com/content/article/pii/S0016236115000848	Evaluation of urban wastes as promising co-fuels for energy production Ã¢â‚¬â€œ A TG/MS study	Despina, Vamvuka	Abstract This work aimed at investigating the potential of using urban wastes and lignite mixtures for energy generation. The objective was to determine the combustion characteristics and the gaseous pollutants of indigenous lignite/urban waste (MSW, RDF, waste paper, sewage sludge, demolition wood) blends, as well as to evaluate the compatibility of each component in the blend. The experiments w…	Fuel	NA	162361	147	NA	2015-05-01	2015-05-01	170	183	10.1016/j.fuel.2015.01.070	0	FALSE	FALSE	NA	Journal	Copyright Ã‚Â© 2015 Elsevier Ltd. All rights reserved.	S0016-2361(15)00084-8	84934964801	2-s2.0-84934964801	This work aimed at investigating the potential of using urban wastes and lignite mixtures for energy generation. The objective was to determine the combustion characteristics and the gaseous pollutants...	NA	NA	NA	Combustion | TGÃ¢â‚¬â€œMS | Wastes | Lignite | Blends	NA	organic_housewaste
178	1-s2.0-S0016236115003877	TRUE	DOI:10.1016/j.fuel.2015.04.004	https://api.elsevier.com/content/article/pii/S0016236115003877	Biodiesels: Oxidizing enhancers to improve CI engine performance and emission quality	Vu H., Nguyen	Abstract Biodiesels, renewable fuels derived from biomass, animal fat, algae, wastes or residues, are amongst potential candidates to improve energy security and to reduce greenhouse gas emissions. Different from fossil diesel which mainly consists of hydrocarbons, biodiesels are oxygenated fuels. Oxygen contained in biodiesels, as an oxidizing enhancer, plays a crucial role in improving the auto…	Fuel	NA	162361	154	NA	2015-08-15	2015-08-15	293	300	10.1016/j.fuel.2015.04.004	0	FALSE	FALSE	NA	Journal	Copyright Ã‚Â© 2015 Elsevier Ltd. All rights reserved.	S0016-2361(15)00387-7	84927933955	2-s2.0-84927933955	Biodiesels, renewable fuels derived from biomass, animal fat, algae, wastes or residues, are amongst potential candidates to improve energy security and to reduce greenhouse gas emissions. Different...	NA	NA	NA	Biodiesel | Oxygen content | Ignition delay | Particle | NOx	NA	biodiesel
179	1-s2.0-S0016236115003877	TRUE	DOI:10.1016/j.fuel.2015.04.004	https://api.elsevier.com/content/article/pii/S0016236115003877	Biodiesels: Oxidizing enhancers to improve CI engine performance and emission quality	Vu H., Nguyen	Abstract Biodiesels, renewable fuels derived from biomass, animal fat, algae, wastes or residues, are amongst potential candidates to improve energy security and to reduce greenhouse gas emissions. Different from fossil diesel which mainly consists of hydrocarbons, biodiesels are oxygenated fuels. Oxygen contained in biodiesels, as an oxidizing enhancer, plays a crucial role in improving the auto…	Fuel	NA	162361	154	NA	2015-08-15	2015-08-15	293	300	10.1016/j.fuel.2015.04.004	0	FALSE	FALSE	NA	Journal	Copyright Ã‚Â© 2015 Elsevier Ltd. All rights reserved.	S0016-2361(15)00387-7	84927933955	2-s2.0-84927933955	Biodiesels, renewable fuels derived from biomass, animal fat, algae, wastes or residues, are amongst potential candidates to improve energy security and to reduce greenhouse gas emissions. Different...	NA	NA	NA	Biodiesel | Oxygen content | Ignition delay | Particle | NOx	NA	animal_fats
180	1-s2.0-S0016236115003877	TRUE	DOI:10.1016/j.fuel.2015.04.004	https://api.elsevier.com/content/article/pii/S0016236115003877	Biodiesels: Oxidizing enhancers to improve CI engine performance and emission quality	Vu H., Nguyen	Abstract Biodiesels, renewable fuels derived from biomass, animal fat, algae, wastes or residues, are amongst potential candidates to improve energy security and to reduce greenhouse gas emissions. Different from fossil diesel which mainly consists of hydrocarbons, biodiesels are oxygenated fuels. Oxygen contained in biodiesels, as an oxidizing enhancer, plays a crucial role in improving the auto…	Fuel	NA	162361	154	NA	2015-08-15	2015-08-15	293	300	10.1016/j.fuel.2015.04.004	0	FALSE	FALSE	NA	Journal	Copyright Ã‚Â© 2015 Elsevier Ltd. All rights reserved.	S0016-2361(15)00387-7	84927933955	2-s2.0-84927933955	Biodiesels, renewable fuels derived from biomass, animal fat, algae, wastes or residues, are amongst potential candidates to improve energy security and to reduce greenhouse gas emissions. Different...	NA	NA	NA	Biodiesel | Oxygen content | Ignition delay | Particle | NOx	NA	dedicated_combustion_/_incineration
181	1-s2.0-S0016236115006420	TRUE	DOI:10.1016/j.fuel.2015.06.062	https://api.elsevier.com/content/article/pii/S0016236115006420	Effect of major impurities in crude glycerol on solubility and properties of glycerol/methanol/bio-oil blends	Mingming, Zhang	Abstract This study investigates the effect of major impurities in crude glycerol (water, soap, NaCl and NaOH) on the solubility and fuel properties of glycerol/methanol/bio-oil blends. All the impurities considered are found to worsen the solubility of glycerol in the bio-oil to some degree. The effect of water and soap on glycerol solubility in the bio-oil only becomes significant when the wate…	Fuel	NA	162361	159	NA	2015-11-01	2015-11-01	118	127	10.1016/j.fuel.2015.06.062	0	FALSE	FALSE	NA	Journal	Copyright Ã‚Â© 2015 Elsevier Ltd. All rights reserved.	S0016-2361(15)00642-0	84934294637	2-s2.0-84934294637	This study investigates the effect of major impurities in crude glycerol (water, soap, NaCl and NaOH) on the solubility and fuel properties of glycerol/methanol/bio-oil blends. All the impurities considered...	NA	NA	NA	Bio-oil | Glycerol | Impurity | Solubility | Fuel properties	NA	glycerol
182	1-s2.0-S0016236115006432	TRUE	DOI:10.1016/j.fuel.2015.06.063	https://api.elsevier.com/content/article/pii/S0016236115006432	Solid fuel production from cattle manure by dewatering using liquefied dimethyl ether	Kazuyuki, Oshita	Abstract Livestock manure is an animal waste that is generated worldwide, and is one of the most abundant waste materials generated in Japan. Its excess application as a fertilizer can cause negative environmental problems; i.e., groundwater pollution and greenhouse gas emissions. When livestock manure is used as a solid fuel, a significant amount of energy is required to remove the high water co…	Fuel	NA	162361	159	NA	2015-11-01	2015-11-01	7	14	10.1016/j.fuel.2015.06.063	0	FALSE	FALSE	NA	Journal	Copyright Ã‚Â© 2015 Elsevier Ltd. All rights reserved.	S0016-2361(15)00643-2	84933502783	2-s2.0-84933502783	Livestock manure is an animal waste that is generated worldwide, and is one of the most abundant waste materials generated in Japan. Its excess application as a fertilizer can cause negative environmental...	NA	NA	NA	Cattle manure | Dimethyl ether | Extraction | Dewatering | Self-ignition | Crude fat	NA	fertilizer
183	1-s2.0-S0016236115006432	TRUE	DOI:10.1016/j.fuel.2015.06.063	https://api.elsevier.com/content/article/pii/S0016236115006432	Solid fuel production from cattle manure by dewatering using liquefied dimethyl ether	Kazuyuki, Oshita	Abstract Livestock manure is an animal waste that is generated worldwide, and is one of the most abundant waste materials generated in Japan. Its excess application as a fertilizer can cause negative environmental problems; i.e., groundwater pollution and greenhouse gas emissions. When livestock manure is used as a solid fuel, a significant amount of energy is required to remove the high water co…	Fuel	NA	162361	159	NA	2015-11-01	2015-11-01	7	14	10.1016/j.fuel.2015.06.063	0	FALSE	FALSE	NA	Journal	Copyright Ã‚Â© 2015 Elsevier Ltd. All rights reserved.	S0016-2361(15)00643-2	84933502783	2-s2.0-84933502783	Livestock manure is an animal waste that is generated worldwide, and is one of the most abundant waste materials generated in Japan. Its excess application as a fertilizer can cause negative environmental...	NA	NA	NA	Cattle manure | Dimethyl ether | Extraction | Dewatering | Self-ignition | Crude fat	NA	cattle_manure
184	1-s2.0-S0016236115006432	TRUE	DOI:10.1016/j.fuel.2015.06.063	https://api.elsevier.com/content/article/pii/S0016236115006432	Solid fuel production from cattle manure by dewatering using liquefied dimethyl ether	Kazuyuki, Oshita	Abstract Livestock manure is an animal waste that is generated worldwide, and is one of the most abundant waste materials generated in Japan. Its excess application as a fertilizer can cause negative environmental problems; i.e., groundwater pollution and greenhouse gas emissions. When livestock manure is used as a solid fuel, a significant amount of energy is required to remove the high water co…	Fuel	NA	162361	159	NA	2015-11-01	2015-11-01	7	14	10.1016/j.fuel.2015.06.063	0	FALSE	FALSE	NA	Journal	Copyright Ã‚Â© 2015 Elsevier Ltd. All rights reserved.	S0016-2361(15)00643-2	84933502783	2-s2.0-84933502783	Livestock manure is an animal waste that is generated worldwide, and is one of the most abundant waste materials generated in Japan. Its excess application as a fertilizer can cause negative environmental...	NA	NA	NA	Cattle manure | Dimethyl ether | Extraction | Dewatering | Self-ignition | Crude fat	NA	dimethylether_(dme)
185	1-s2.0-S0016236115012594	TRUE	DOI:10.1016/j.fuel.2015.12.006	https://api.elsevier.com/content/article/pii/S0016236115012594	Fate of inorganic material during hydrothermal carbonisation of biomass: Influence of feedstock on combustion behaviour of hydrochar	Aidan M., Smith	Abstract A series of high moisture content biomass have been processed by hydrothermal carbonisation (HTC) in a batch reactor at two temperatures (200Ã‚Â°C and 250Ã‚Â°C). The feedstocks processed include food waste, secondary sewage sludge, AD press cake, microalgae, macroalgae and a fibre derived from municipal derived wastes. In addition, three lignocellulosic biomass including miscanthus, will…	Fuel	NA	162361	169	NA	2016-04-01	2016-04-01	135	145	10.1016/j.fuel.2015.12.006	0	FALSE	FALSE	NA	Journal	Copyright Ã‚Â© 2015 Published by Elsevier Ltd.	S0016-2361(15)01259-4	84951738182	2-s2.0-84951738182	A series of high moisture content biomass have been processed by hydrothermal carbonisation (HTC) in a batch reactor at two temperatures (200Ã‚Â°C and 250Ã‚Â°C). The feedstocks processed include food waste,...	NA	NA	NA	Biomass pre-treatment | Hydrochar | Ash | Combustion | Inorganic elements | Fouling index	NA	dedicated_combustion_/_incineration
186	1-s2.0-S0016236115012594	TRUE	DOI:10.1016/j.fuel.2015.12.006	https://api.elsevier.com/content/article/pii/S0016236115012594	Fate of inorganic material during hydrothermal carbonisation of biomass: Influence of feedstock on combustion behaviour of hydrochar	Aidan M., Smith	Abstract A series of high moisture content biomass have been processed by hydrothermal carbonisation (HTC) in a batch reactor at two temperatures (200Ã‚Â°C and 250Ã‚Â°C). The feedstocks processed include food waste, secondary sewage sludge, AD press cake, microalgae, macroalgae and a fibre derived from municipal derived wastes. In addition, three lignocellulosic biomass including miscanthus, will…	Fuel	NA	162361	169	NA	2016-04-01	2016-04-01	135	145	10.1016/j.fuel.2015.12.006	0	FALSE	FALSE	NA	Journal	Copyright Ã‚Â© 2015 Published by Elsevier Ltd.	S0016-2361(15)01259-4	84951738182	2-s2.0-84951738182	A series of high moisture content biomass have been processed by hydrothermal carbonisation (HTC) in a batch reactor at two temperatures (200Ã‚Â°C and 250Ã‚Â°C). The feedstocks processed include food waste,...	NA	NA	NA	Biomass pre-treatment | Hydrochar | Ash | Combustion | Inorganic elements | Fouling index	NA	food_leftovers
187	1-s2.0-S0016236116001666	TRUE	DOI:10.1016/j.fuel.2016.02.045	https://api.elsevier.com/content/article/pii/S0016236116001666	Introduction to frictional pyrolysis (FP) Ã¢â‚¬â€œ An alternative method for converting biomass to solid carbonaceous products	S., Vakalis	Abstract In the biomass sector, technologies like carbonization and torrefaction have been utilized for the production of solid carbonaceous biofuels and materials. In the framework of this manuscript a novel method for production of solid carbonaceous materials is introduced and is defined from now on as frictional pyrolysis. It uses only the application of pressure and friction whereas no exter…	Fuel	NA	162361	175	NA	2016-07-01	2016-07-01	49	56	10.1016/j.fuel.2016.02.045	0	FALSE	FALSE	NA	Journal	Copyright Ã‚Â© 2016 Elsevier Ltd. All rights reserved.	S0016-2361(16)00166-6	84958818488	2-s2.0-84958818488	In the biomass sector, technologies like carbonization and torrefaction have been utilized for the production of solid carbonaceous biofuels and materials. In the framework of this manuscript a novel...	NA	NA	NA	Biocoal | Charcoal | Carbonization | Steam explosion | Corn stover | STA	NA	maize_stover
188	1-s2.0-S0016236116001666	TRUE	DOI:10.1016/j.fuel.2016.02.045	https://api.elsevier.com/content/article/pii/S0016236116001666	Introduction to frictional pyrolysis (FP) Ã¢â‚¬â€œ An alternative method for converting biomass to solid carbonaceous products	S., Vakalis	Abstract In the biomass sector, technologies like carbonization and torrefaction have been utilized for the production of solid carbonaceous biofuels and materials. In the framework of this manuscript a novel method for production of solid carbonaceous materials is introduced and is defined from now on as frictional pyrolysis. It uses only the application of pressure and friction whereas no exter…	Fuel	NA	162361	175	NA	2016-07-01	2016-07-01	49	56	10.1016/j.fuel.2016.02.045	0	FALSE	FALSE	NA	Journal	Copyright Ã‚Â© 2016 Elsevier Ltd. All rights reserved.	S0016-2361(16)00166-6	84958818488	2-s2.0-84958818488	In the biomass sector, technologies like carbonization and torrefaction have been utilized for the production of solid carbonaceous biofuels and materials. In the framework of this manuscript a novel...	NA	NA	NA	Biocoal | Charcoal | Carbonization | Steam explosion | Corn stover | STA	NA	torrefaction
189	1-s2.0-S0016236116301119	TRUE	DOI:10.1016/j.fuel.2016.03.074	https://api.elsevier.com/content/article/pii/S0016236116301119	Hydrotreatment of fast pyrolysis oil: Effects of esterification pre-treatment of the oil using alcohol at a small loading	Ehsan, Reyhanitash	Abstract Aiming to retard the self-polymerization of the reaction intermediates during bio-oil upgrading process, a large amount of alcohol (e.g., 50wt% with respect to bio-oil) was used in the stabilization of fast pyrolysis oil by esterification before hydrotreatment by the authors in a previous work. In order to reduce the amount of alcohol use and hence improve the process economy, effects of…	Fuel	NA	162361	179	NA	2016-09-01	2016-09-01	45	51	10.1016/j.fuel.2016.03.074	0	FALSE	FALSE	NA	Journal	Copyright Ã‚Â© 2016 Elsevier Ltd. All rights reserved.	S0016-2361(16)30111-9	84961864420	2-s2.0-84961864420	Aiming to retard the self-polymerization of the reaction intermediates during bio-oil upgrading process, a large amount of alcohol (e.g., 50wt% with respect to bio-oil) was used in the stabilization...	NA	NA	NA	Fast pyrolysis oil | Stabilization | Methanol | Ethanol | Glycerol | Hydrotreatment	NA	methanol
190	1-s2.0-S0016236116301119	TRUE	DOI:10.1016/j.fuel.2016.03.074	https://api.elsevier.com/content/article/pii/S0016236116301119	Hydrotreatment of fast pyrolysis oil: Effects of esterification pre-treatment of the oil using alcohol at a small loading	Ehsan, Reyhanitash	Abstract Aiming to retard the self-polymerization of the reaction intermediates during bio-oil upgrading process, a large amount of alcohol (e.g., 50wt% with respect to bio-oil) was used in the stabilization of fast pyrolysis oil by esterification before hydrotreatment by the authors in a previous work. In order to reduce the amount of alcohol use and hence improve the process economy, effects of…	Fuel	NA	162361	179	NA	2016-09-01	2016-09-01	45	51	10.1016/j.fuel.2016.03.074	0	FALSE	FALSE	NA	Journal	Copyright Ã‚Â© 2016 Elsevier Ltd. All rights reserved.	S0016-2361(16)30111-9	84961864420	2-s2.0-84961864420	Aiming to retard the self-polymerization of the reaction intermediates during bio-oil upgrading process, a large amount of alcohol (e.g., 50wt% with respect to bio-oil) was used in the stabilization...	NA	NA	NA	Fast pyrolysis oil | Stabilization | Methanol | Ethanol | Glycerol | Hydrotreatment	NA	pyrolysis_oil
191	1-s2.0-S0016236116301119	TRUE	DOI:10.1016/j.fuel.2016.03.074	https://api.elsevier.com/content/article/pii/S0016236116301119	Hydrotreatment of fast pyrolysis oil: Effects of esterification pre-treatment of the oil using alcohol at a small loading	Ehsan, Reyhanitash	Abstract Aiming to retard the self-polymerization of the reaction intermediates during bio-oil upgrading process, a large amount of alcohol (e.g., 50wt% with respect to bio-oil) was used in the stabilization of fast pyrolysis oil by esterification before hydrotreatment by the authors in a previous work. In order to reduce the amount of alcohol use and hence improve the process economy, effects of…	Fuel	NA	162361	179	NA	2016-09-01	2016-09-01	45	51	10.1016/j.fuel.2016.03.074	0	FALSE	FALSE	NA	Journal	Copyright Ã‚Â© 2016 Elsevier Ltd. All rights reserved.	S0016-2361(16)30111-9	84961864420	2-s2.0-84961864420	Aiming to retard the self-polymerization of the reaction intermediates during bio-oil upgrading process, a large amount of alcohol (e.g., 50wt% with respect to bio-oil) was used in the stabilization...	NA	NA	NA	Fast pyrolysis oil | Stabilization | Methanol | Ethanol | Glycerol | Hydrotreatment	NA	glycerol
192	1-s2.0-S0016236116301119	TRUE	DOI:10.1016/j.fuel.2016.03.074	https://api.elsevier.com/content/article/pii/S0016236116301119	Hydrotreatment of fast pyrolysis oil: Effects of esterification pre-treatment of the oil using alcohol at a small loading	Ehsan, Reyhanitash	Abstract Aiming to retard the self-polymerization of the reaction intermediates during bio-oil upgrading process, a large amount of alcohol (e.g., 50wt% with respect to bio-oil) was used in the stabilization of fast pyrolysis oil by esterification before hydrotreatment by the authors in a previous work. In order to reduce the amount of alcohol use and hence improve the process economy, effects of…	Fuel	NA	162361	179	NA	2016-09-01	2016-09-01	45	51	10.1016/j.fuel.2016.03.074	0	FALSE	FALSE	NA	Journal	Copyright Ã‚Â© 2016 Elsevier Ltd. All rights reserved.	S0016-2361(16)30111-9	84961864420	2-s2.0-84961864420	Aiming to retard the self-polymerization of the reaction intermediates during bio-oil upgrading process, a large amount of alcohol (e.g., 50wt% with respect to bio-oil) was used in the stabilization...	NA	NA	NA	Fast pyrolysis oil | Stabilization | Methanol | Ethanol | Glycerol | Hydrotreatment	NA	ethanol_/_bioethanol
193	1-s2.0-S0016236116301909	TRUE	DOI:10.1016/j.fuel.2016.04.034	https://api.elsevier.com/content/article/pii/S0016236116301909	Combustion tests of grape marc in a multi-fuel domestic boiler	C., SchÃƒÂ¶nnenbeck	Abstract New sources of renewable energy have to be found in order to cope with possible fossil fuel scarcity. Among the renewable energy mix, biomass burning has an almost neutral CO2 balance, especially when local biomass sourcing is possible. Among the diverse biomass sources, agricultural by-products such as rice husk, corn waste, palm waste, sugarcane, date palm, olive mill wastewaterÃ¢â‚¬Â¦…	Fuel	NA	162361	180	NA	2016-09-15	2016-09-15	324	331	10.1016/j.fuel.2016.04.034	0	FALSE	FALSE	NA	Journal	Ã‚Â© 2016 Elsevier Ltd. All rights reserved.	S0016-2361(16)30190-9	84963537221	2-s2.0-84963537221	New sources of renewable energy have to be found in order to cope with possible fossil fuel scarcity. Among the renewable energy mix, biomass burning has an almost neutral CO2 balance, especially when...	NA	NA	Full Length Article	Grape marc residue | Energy recovery | Biofuel combustion | Domestic boiler | Gaseous emissions | Particle emissions | Total Suspended Particles | Electrical Low Pressure Impactor (ELPI)	NA	dedicated_combustion_/_incineration
194	1-s2.0-S0016236116301909	TRUE	DOI:10.1016/j.fuel.2016.04.034	https://api.elsevier.com/content/article/pii/S0016236116301909	Combustion tests of grape marc in a multi-fuel domestic boiler	C., SchÃƒÂ¶nnenbeck	Abstract New sources of renewable energy have to be found in order to cope with possible fossil fuel scarcity. Among the renewable energy mix, biomass burning has an almost neutral CO2 balance, especially when local biomass sourcing is possible. Among the diverse biomass sources, agricultural by-products such as rice husk, corn waste, palm waste, sugarcane, date palm, olive mill wastewaterÃ¢â‚¬Â¦…	Fuel	NA	162361	180	NA	2016-09-15	2016-09-15	324	331	10.1016/j.fuel.2016.04.034	0	FALSE	FALSE	NA	Journal	Ã‚Â© 2016 Elsevier Ltd. All rights reserved.	S0016-2361(16)30190-9	84963537221	2-s2.0-84963537221	New sources of renewable energy have to be found in order to cope with possible fossil fuel scarcity. Among the renewable energy mix, biomass burning has an almost neutral CO2 balance, especially when...	NA	NA	Full Length Article	Grape marc residue | Energy recovery | Biofuel combustion | Domestic boiler | Gaseous emissions | Particle emissions | Total Suspended Particles | Electrical Low Pressure Impactor (ELPI)	NA	grape_marc
195	1-s2.0-S0016236116303465	TRUE	DOI:10.1016/j.fuel.2016.05.031	https://api.elsevier.com/content/article/pii/S0016236116303465	Combustion, pyrolysis and char CO2-gasification characteristics of hydrothermal carbonization solid fuel from municipal solid wastes	Yousheng, Lin	Abstract Hydrothermal carbonization (HTC) is a promising pretreatment for converting wet biomass waste into a solid fuel. In this paper, the resource utilization of municipal solid wastes (MSW) for energy purposes was studied. Experiments were employed at several temperatures (210, 230, 250 and 280Ã‚Â°C) and residence times (30, 60 and 90min) to investigate the effects on the combustion, pyrolysi…	Fuel	NA	162361	181	NA	2016-10-01	2016-10-01	905	915	10.1016/j.fuel.2016.05.031	0	FALSE	FALSE	NA	Journal	Ã‚Â© 2016 Elsevier Ltd. All rights reserved.	S0016-2361(16)30346-5	84966593272	2-s2.0-84966593272	Hydrothermal carbonization (HTC) is a promising pretreatment for converting wet biomass waste into a solid fuel. In this paper, the resource utilization of municipal solid wastes (MSW) for energy purposes...	NA	NA	Full Length Article	Hydrothermal carbonization | Municipal solid wastes | Combustion | Pyrolysis | CO2-gasification | Kinetics	NA	dedicated_combustion_/_incineration
196	1-s2.0-S0016236116303465	TRUE	DOI:10.1016/j.fuel.2016.05.031	https://api.elsevier.com/content/article/pii/S0016236116303465	Combustion, pyrolysis and char CO2-gasification characteristics of hydrothermal carbonization solid fuel from municipal solid wastes	Yousheng, Lin	Abstract Hydrothermal carbonization (HTC) is a promising pretreatment for converting wet biomass waste into a solid fuel. In this paper, the resource utilization of municipal solid wastes (MSW) for energy purposes was studied. Experiments were employed at several temperatures (210, 230, 250 and 280Ã‚Â°C) and residence times (30, 60 and 90min) to investigate the effects on the combustion, pyrolysi…	Fuel	NA	162361	181	NA	2016-10-01	2016-10-01	905	915	10.1016/j.fuel.2016.05.031	0	FALSE	FALSE	NA	Journal	Ã‚Â© 2016 Elsevier Ltd. All rights reserved.	S0016-2361(16)30346-5	84966593272	2-s2.0-84966593272	Hydrothermal carbonization (HTC) is a promising pretreatment for converting wet biomass waste into a solid fuel. In this paper, the resource utilization of municipal solid wastes (MSW) for energy purposes...	NA	NA	Full Length Article	Hydrothermal carbonization | Municipal solid wastes | Combustion | Pyrolysis | CO2-gasification | Kinetics	NA	organic_housewaste
197	1-s2.0-S0016236116307815	TRUE	DOI:10.1016/j.fuel.2016.08.043	https://api.elsevier.com/content/article/pii/S0016236116307815	Dark fermentative hydrogen and ethanol production from biodiesel waste glycerol using a co-culture of Escherichia coli and Enterobacter sp.	B.T., Maru	Abstract In previous comparative studies, Enterobacter spH1 was selected as the best hydrogen and ethanol producer (Knothe, 2010). Here, glycerol fermentation was compared between three other strains: Escherichia coli CECT432, Escherichia coli CECT434 and Enterobacter cloacae MCM2/1. E. coli CECT432 was found to perform best with a H2 productivity of 69.1mM (1307mL/L). A co-culture of this E. col…	Fuel	NA	162361	186	NA	2016-12-15	2016-12-15	375	384	10.1016/j.fuel.2016.08.043	0	FALSE	FALSE	NA	Journal	Ã‚Â© 2016 Elsevier Ltd. All rights reserved.	S0016-2361(16)30781-5	84989856992	2-s2.0-84989856992	In previous comparative studies, Enterobacter spH1 was selected as the best hydrogen and ethanol producer (Knothe, 2010). Here, glycerol fermentation was compared between three other strains: Escherichia...	NA	NA	Full Length Article	Hydrogen | Dark fermentation | E. coli | Enterobacter | Biodiesel | Glycerol	NA	ethanol_/_bioethanol
198	1-s2.0-S0016236116307815	TRUE	DOI:10.1016/j.fuel.2016.08.043	https://api.elsevier.com/content/article/pii/S0016236116307815	Dark fermentative hydrogen and ethanol production from biodiesel waste glycerol using a co-culture of Escherichia coli and Enterobacter sp.	B.T., Maru	Abstract In previous comparative studies, Enterobacter spH1 was selected as the best hydrogen and ethanol producer (Knothe, 2010). Here, glycerol fermentation was compared between three other strains: Escherichia coli CECT432, Escherichia coli CECT434 and Enterobacter cloacae MCM2/1. E. coli CECT432 was found to perform best with a H2 productivity of 69.1mM (1307mL/L). A co-culture of this E. col…	Fuel	NA	162361	186	NA	2016-12-15	2016-12-15	375	384	10.1016/j.fuel.2016.08.043	0	FALSE	FALSE	NA	Journal	Ã‚Â© 2016 Elsevier Ltd. All rights reserved.	S0016-2361(16)30781-5	84989856992	2-s2.0-84989856992	In previous comparative studies, Enterobacter spH1 was selected as the best hydrogen and ethanol producer (Knothe, 2010). Here, glycerol fermentation was compared between three other strains: Escherichia...	NA	NA	Full Length Article	Hydrogen | Dark fermentation | E. coli | Enterobacter | Biodiesel | Glycerol	NA	glycerol
199	1-s2.0-S0016236116307815	TRUE	DOI:10.1016/j.fuel.2016.08.043	https://api.elsevier.com/content/article/pii/S0016236116307815	Dark fermentative hydrogen and ethanol production from biodiesel waste glycerol using a co-culture of Escherichia coli and Enterobacter sp.	B.T., Maru	Abstract In previous comparative studies, Enterobacter spH1 was selected as the best hydrogen and ethanol producer (Knothe, 2010). Here, glycerol fermentation was compared between three other strains: Escherichia coli CECT432, Escherichia coli CECT434 and Enterobacter cloacae MCM2/1. E. coli CECT432 was found to perform best with a H2 productivity of 69.1mM (1307mL/L). A co-culture of this E. col…	Fuel	NA	162361	186	NA	2016-12-15	2016-12-15	375	384	10.1016/j.fuel.2016.08.043	0	FALSE	FALSE	NA	Journal	Ã‚Â© 2016 Elsevier Ltd. All rights reserved.	S0016-2361(16)30781-5	84989856992	2-s2.0-84989856992	In previous comparative studies, Enterobacter spH1 was selected as the best hydrogen and ethanol producer (Knothe, 2010). Here, glycerol fermentation was compared between three other strains: Escherichia...	NA	NA	Full Length Article	Hydrogen | Dark fermentation | E. coli | Enterobacter | Biodiesel | Glycerol	NA	biodiesel
200	1-s2.0-S0016236116307943	TRUE	DOI:10.1016/j.fuel.2016.08.056	https://api.elsevier.com/content/article/pii/S0016236116307943	Performance assessment of dilute-acid leaching to improve corn stover quality for thermochemical conversion	John E., Aston	Abstract Lignocellulosic biomass is a sustainable energy source that can help meet the demand for biofuels in the United States. However, the quality and availability of such feedstocks greatly affect their suitability for downstream conversion. This work reports the effects of dilute-acid leaching at various aqueous loadings, temperatures and catalyst loadings (sulfuric acid) on the quality of a…	Fuel	NA	162361	186	NA	2016-12-15	2016-12-15	311	319	10.1016/j.fuel.2016.08.056	0	FALSE	FALSE	NA	Journal	Ã‚Â© 2016 Elsevier Ltd. All rights reserved.	S0016-2361(16)30794-3	84989930069	2-s2.0-84989930069	Lignocellulosic biomass is a sustainable energy source that can help meet the demand for biofuels in the United States. However, the quality and availability of such feedstocks greatly affect their...	NA	NA	Full Length Article	Corn stover | Pyrolysis | Hydrothermal liquefaction | Combustion | Leaching | Ash	NA	pyrolysis_oil
201	1-s2.0-S0016236116307943	TRUE	DOI:10.1016/j.fuel.2016.08.056	https://api.elsevier.com/content/article/pii/S0016236116307943	Performance assessment of dilute-acid leaching to improve corn stover quality for thermochemical conversion	John E., Aston	Abstract Lignocellulosic biomass is a sustainable energy source that can help meet the demand for biofuels in the United States. However, the quality and availability of such feedstocks greatly affect their suitability for downstream conversion. This work reports the effects of dilute-acid leaching at various aqueous loadings, temperatures and catalyst loadings (sulfuric acid) on the quality of a…	Fuel	NA	162361	186	NA	2016-12-15	2016-12-15	311	319	10.1016/j.fuel.2016.08.056	0	FALSE	FALSE	NA	Journal	Ã‚Â© 2016 Elsevier Ltd. All rights reserved.	S0016-2361(16)30794-3	84989930069	2-s2.0-84989930069	Lignocellulosic biomass is a sustainable energy source that can help meet the demand for biofuels in the United States. However, the quality and availability of such feedstocks greatly affect their...	NA	NA	Full Length Article	Corn stover | Pyrolysis | Hydrothermal liquefaction | Combustion | Leaching | Ash	NA	maize_stover
202	1-s2.0-S0016236116307943	TRUE	DOI:10.1016/j.fuel.2016.08.056	https://api.elsevier.com/content/article/pii/S0016236116307943	Performance assessment of dilute-acid leaching to improve corn stover quality for thermochemical conversion	John E., Aston	Abstract Lignocellulosic biomass is a sustainable energy source that can help meet the demand for biofuels in the United States. However, the quality and availability of such feedstocks greatly affect their suitability for downstream conversion. This work reports the effects of dilute-acid leaching at various aqueous loadings, temperatures and catalyst loadings (sulfuric acid) on the quality of a…	Fuel	NA	162361	186	NA	2016-12-15	2016-12-15	311	319	10.1016/j.fuel.2016.08.056	0	FALSE	FALSE	NA	Journal	Ã‚Â© 2016 Elsevier Ltd. All rights reserved.	S0016-2361(16)30794-3	84989930069	2-s2.0-84989930069	Lignocellulosic biomass is a sustainable energy source that can help meet the demand for biofuels in the United States. However, the quality and availability of such feedstocks greatly affect their...	NA	NA	Full Length Article	Corn stover | Pyrolysis | Hydrothermal liquefaction | Combustion | Leaching | Ash	NA	dedicated_combustion_/_incineration
203	1-s2.0-S0016236116310523	TRUE	DOI:10.1016/j.fuel.2016.10.089	https://api.elsevier.com/content/article/pii/S0016236116310523	Multi-scale characterisation of chars mineral species for tar cracking	Maxime, Hervy	Abstract Syngas from thermochemical conversion of waste or biomass is a renewable energy carrier that may contain pollutants Ã¢â‚¬â€œ such as tar Ã¢â‚¬â€œ that should be removed before further syngas utilisation. Chars have proved to be promising catalysts for tar cracking, but the influence of the physico-chemical properties on their reactivity is still unclear. This work aimed to better underst…	Fuel	NA	162361	189	NA	2017-02-01	2017-02-01	88	97	10.1016/j.fuel.2016.10.089	0	FALSE	FALSE	NA	Journal	Ã‚Â© 2016 Elsevier Ltd. All rights reserved.	S0016-2361(16)31052-3	84994588971	2-s2.0-84994588971	Syngas from thermochemical conversion of waste or biomass is a renewable energy carrier that may contain pollutants Ã¢â‚¬â€œ such as tar Ã¢â‚¬â€œ that should be removed before further syngas utilisation. Chars have...	NA	NA	Full Length Article	Catalyst | Pyrolysis | Chars | Mineral species | Multi-scale characterisation	NA	food_leftovers
204	1-s2.0-S0016236116310523	TRUE	DOI:10.1016/j.fuel.2016.10.089	https://api.elsevier.com/content/article/pii/S0016236116310523	Multi-scale characterisation of chars mineral species for tar cracking	Maxime, Hervy	Abstract Syngas from thermochemical conversion of waste or biomass is a renewable energy carrier that may contain pollutants Ã¢â‚¬â€œ such as tar Ã¢â‚¬â€œ that should be removed before further syngas utilisation. Chars have proved to be promising catalysts for tar cracking, but the influence of the physico-chemical properties on their reactivity is still unclear. This work aimed to better underst…	Fuel	NA	162361	189	NA	2017-02-01	2017-02-01	88	97	10.1016/j.fuel.2016.10.089	0	FALSE	FALSE	NA	Journal	Ã‚Â© 2016 Elsevier Ltd. All rights reserved.	S0016-2361(16)31052-3	84994588971	2-s2.0-84994588971	Syngas from thermochemical conversion of waste or biomass is a renewable energy carrier that may contain pollutants Ã¢â‚¬â€œ such as tar Ã¢â‚¬â€œ that should be removed before further syngas utilisation. Chars have...	NA	NA	Full Length Article	Catalyst | Pyrolysis | Chars | Mineral species | Multi-scale characterisation	NA	syngas
205	1-s2.0-S0016236116310985	TRUE	DOI:10.1016/j.fuel.2016.11.005	https://api.elsevier.com/content/article/pii/S0016236116310985	Effect of oxygen addition in steam gasification of chicken manure	M.S., Hussein	Abstract The continued increase in the production scale of chicken industry have led to increased use of chicken manure as fertilizers or landfill disposal which leads to land and water pollution by eutrophication from landfills. Thus, although chicken manure is rich in ash and moisture content, thermochemical waste to energy techniques such as gasification of chicken manure makes it an efficient…	Fuel	NA	162361	189	NA	2017-02-01	2017-02-01	428	435	10.1016/j.fuel.2016.11.005	0	FALSE	FALSE	NA	Journal	Ã‚Â© 2016 Elsevier Ltd. All rights reserved.	S0016-2361(16)31098-5	84994624489	2-s2.0-84994624489	The continued increase in the production scale of chicken industry have led to increased use of chicken manure as fertilizers or landfill disposal which leads to land and water pollution by eutrophication...	NA	NA	Full Length Article	Steam/oxygen gasification | Chicken manure | Biomass | Evolved syngas analysis | Renewable energy	NA	poultry_manure
206	1-s2.0-S0016236116310985	TRUE	DOI:10.1016/j.fuel.2016.11.005	https://api.elsevier.com/content/article/pii/S0016236116310985	Effect of oxygen addition in steam gasification of chicken manure	M.S., Hussein	Abstract The continued increase in the production scale of chicken industry have led to increased use of chicken manure as fertilizers or landfill disposal which leads to land and water pollution by eutrophication from landfills. Thus, although chicken manure is rich in ash and moisture content, thermochemical waste to energy techniques such as gasification of chicken manure makes it an efficient…	Fuel	NA	162361	189	NA	2017-02-01	2017-02-01	428	435	10.1016/j.fuel.2016.11.005	0	FALSE	FALSE	NA	Journal	Ã‚Â© 2016 Elsevier Ltd. All rights reserved.	S0016-2361(16)31098-5	84994624489	2-s2.0-84994624489	The continued increase in the production scale of chicken industry have led to increased use of chicken manure as fertilizers or landfill disposal which leads to land and water pollution by eutrophication...	NA	NA	Full Length Article	Steam/oxygen gasification | Chicken manure | Biomass | Evolved syngas analysis | Renewable energy	NA	syngas
207	1-s2.0-S001623611631290X	TRUE	DOI:10.1016/j.fuel.2016.12.053	https://api.elsevier.com/content/article/pii/S001623611631290X	Carbohydrates as binders in biomass densification for biochemical and thermochemical processes	Majid, Soleimani	Abstract This study was conducted to verify the potential application of carbohydrates with low molecular weight (MW) as ash-free as well as nitrogen- and sulfur-free binders in biomass densification for solid biofuels. In the first step, different kinds of carbohydrates including molasses (industrial byproduct), fructose, maltodextrin, sucrose, and glucose alongside lignosulfonate (phenolic bypr…	Fuel	NA	162361	193	NA	2017-04-01	2017-04-01	134	141	10.1016/j.fuel.2016.12.053	0	FALSE	FALSE	NA	Journal	Ã‚Â© 2016 Elsevier Ltd. All rights reserved.	S0016-2361(16)31290-X	85007164361	2-s2.0-85007164361	This study was conducted to verify the potential application of carbohydrates with low molecular weight (MW) as ash-free as well as nitrogen- and sulfur-free binders in biomass densification for solid...	NA	NA	Full Length Article	Lignocellulose | Solid fuel | Biofuel | Pelletization | Binding agent | Sugar | Lubricant	NA	glycerol
208	1-s2.0-S001623611631290X	TRUE	DOI:10.1016/j.fuel.2016.12.053	https://api.elsevier.com/content/article/pii/S001623611631290X	Carbohydrates as binders in biomass densification for biochemical and thermochemical processes	Majid, Soleimani	Abstract This study was conducted to verify the potential application of carbohydrates with low molecular weight (MW) as ash-free as well as nitrogen- and sulfur-free binders in biomass densification for solid biofuels. In the first step, different kinds of carbohydrates including molasses (industrial byproduct), fructose, maltodextrin, sucrose, and glucose alongside lignosulfonate (phenolic bypr…	Fuel	NA	162361	193	NA	2017-04-01	2017-04-01	134	141	10.1016/j.fuel.2016.12.053	0	FALSE	FALSE	NA	Journal	Ã‚Â© 2016 Elsevier Ltd. All rights reserved.	S0016-2361(16)31290-X	85007164361	2-s2.0-85007164361	This study was conducted to verify the potential application of carbohydrates with low molecular weight (MW) as ash-free as well as nitrogen- and sulfur-free binders in biomass densification for solid...	NA	NA	Full Length Article	Lignocellulose | Solid fuel | Biofuel | Pelletization | Binding agent | Sugar | Lubricant	NA	fructose
209	1-s2.0-S001623611631290X	TRUE	DOI:10.1016/j.fuel.2016.12.053	https://api.elsevier.com/content/article/pii/S001623611631290X	Carbohydrates as binders in biomass densification for biochemical and thermochemical processes	Majid, Soleimani	Abstract This study was conducted to verify the potential application of carbohydrates with low molecular weight (MW) as ash-free as well as nitrogen- and sulfur-free binders in biomass densification for solid biofuels. In the first step, different kinds of carbohydrates including molasses (industrial byproduct), fructose, maltodextrin, sucrose, and glucose alongside lignosulfonate (phenolic bypr…	Fuel	NA	162361	193	NA	2017-04-01	2017-04-01	134	141	10.1016/j.fuel.2016.12.053	0	FALSE	FALSE	NA	Journal	Ã‚Â© 2016 Elsevier Ltd. All rights reserved.	S0016-2361(16)31290-X	85007164361	2-s2.0-85007164361	This study was conducted to verify the potential application of carbohydrates with low molecular weight (MW) as ash-free as well as nitrogen- and sulfur-free binders in biomass densification for solid...	NA	NA	Full Length Article	Lignocellulose | Solid fuel | Biofuel | Pelletization | Binding agent | Sugar | Lubricant	NA	wheat_straw
210	1-s2.0-S001623611631290X	TRUE	DOI:10.1016/j.fuel.2016.12.053	https://api.elsevier.com/content/article/pii/S001623611631290X	Carbohydrates as binders in biomass densification for biochemical and thermochemical processes	Majid, Soleimani	Abstract This study was conducted to verify the potential application of carbohydrates with low molecular weight (MW) as ash-free as well as nitrogen- and sulfur-free binders in biomass densification for solid biofuels. In the first step, different kinds of carbohydrates including molasses (industrial byproduct), fructose, maltodextrin, sucrose, and glucose alongside lignosulfonate (phenolic bypr…	Fuel	NA	162361	193	NA	2017-04-01	2017-04-01	134	141	10.1016/j.fuel.2016.12.053	0	FALSE	FALSE	NA	Journal	Ã‚Â© 2016 Elsevier Ltd. All rights reserved.	S0016-2361(16)31290-X	85007164361	2-s2.0-85007164361	This study was conducted to verify the potential application of carbohydrates with low molecular weight (MW) as ash-free as well as nitrogen- and sulfur-free binders in biomass densification for solid...	NA	NA	Full Length Article	Lignocellulose | Solid fuel | Biofuel | Pelletization | Binding agent | Sugar | Lubricant	NA	sugar_beet_melasse
211	1-s2.0-S001623611631290X	TRUE	DOI:10.1016/j.fuel.2016.12.053	https://api.elsevier.com/content/article/pii/S001623611631290X	Carbohydrates as binders in biomass densification for biochemical and thermochemical processes	Majid, Soleimani	Abstract This study was conducted to verify the potential application of carbohydrates with low molecular weight (MW) as ash-free as well as nitrogen- and sulfur-free binders in biomass densification for solid biofuels. In the first step, different kinds of carbohydrates including molasses (industrial byproduct), fructose, maltodextrin, sucrose, and glucose alongside lignosulfonate (phenolic bypr…	Fuel	NA	162361	193	NA	2017-04-01	2017-04-01	134	141	10.1016/j.fuel.2016.12.053	0	FALSE	FALSE	NA	Journal	Ã‚Â© 2016 Elsevier Ltd. All rights reserved.	S0016-2361(16)31290-X	85007164361	2-s2.0-85007164361	This study was conducted to verify the potential application of carbohydrates with low molecular weight (MW) as ash-free as well as nitrogen- and sulfur-free binders in biomass densification for solid...	NA	NA	Full Length Article	Lignocellulose | Solid fuel | Biofuel | Pelletization | Binding agent | Sugar | Lubricant	NA	briquette_/_pellet_fuel
212	1-s2.0-S001623611730073X	TRUE	DOI:10.1016/j.fuel.2017.01.065	https://api.elsevier.com/content/article/pii/S001623611730073X	Non-catalytic conversion of glycerol to syngas at intermediate temperatures: Numerical methods with detailed chemistry	Mohsen, Ayoobi	Abstract Glycerol is available in high volumes and at low costs as a byproduct of bio-diesel production. While combustion characteristics are poor, it is appealing to investigate potential reforming processes to recover its hydrogen and carbon in the form of synthesis gas, i.e. a combustible mixture of hydrogen, carbon monoxide, methane and other small hydrocarbon species. This study pursues a no…	Fuel	NA	162361	195	NA	2017-05-01	2017-05-01	190	200	10.1016/j.fuel.2017.01.065	0	FALSE	FALSE	NA	Journal	Ã‚Â© 2017 Elsevier Ltd. All rights reserved.	S0016-2361(17)30073-X	85010288049	2-s2.0-85010288049	Glycerol is available in high volumes and at low costs as a byproduct of bio-diesel production. While combustion characteristics are poor, it is appealing to investigate potential reforming processes...	NA	NA	Full Length Article	Non-catalytic glycerol reforming | Syngas production | Numerical methods | Detailed chemistry | Partial oxidation | Pyrolysis	NA	methanol
213	1-s2.0-S001623611730073X	TRUE	DOI:10.1016/j.fuel.2017.01.065	https://api.elsevier.com/content/article/pii/S001623611730073X	Non-catalytic conversion of glycerol to syngas at intermediate temperatures: Numerical methods with detailed chemistry	Mohsen, Ayoobi	Abstract Glycerol is available in high volumes and at low costs as a byproduct of bio-diesel production. While combustion characteristics are poor, it is appealing to investigate potential reforming processes to recover its hydrogen and carbon in the form of synthesis gas, i.e. a combustible mixture of hydrogen, carbon monoxide, methane and other small hydrocarbon species. This study pursues a no…	Fuel	NA	162361	195	NA	2017-05-01	2017-05-01	190	200	10.1016/j.fuel.2017.01.065	0	FALSE	FALSE	NA	Journal	Ã‚Â© 2017 Elsevier Ltd. All rights reserved.	S0016-2361(17)30073-X	85010288049	2-s2.0-85010288049	Glycerol is available in high volumes and at low costs as a byproduct of bio-diesel production. While combustion characteristics are poor, it is appealing to investigate potential reforming processes...	NA	NA	Full Length Article	Non-catalytic glycerol reforming | Syngas production | Numerical methods | Detailed chemistry | Partial oxidation | Pyrolysis	NA	glycerol
214	1-s2.0-S001623611730073X	TRUE	DOI:10.1016/j.fuel.2017.01.065	https://api.elsevier.com/content/article/pii/S001623611730073X	Non-catalytic conversion of glycerol to syngas at intermediate temperatures: Numerical methods with detailed chemistry	Mohsen, Ayoobi	Abstract Glycerol is available in high volumes and at low costs as a byproduct of bio-diesel production. While combustion characteristics are poor, it is appealing to investigate potential reforming processes to recover its hydrogen and carbon in the form of synthesis gas, i.e. a combustible mixture of hydrogen, carbon monoxide, methane and other small hydrocarbon species. This study pursues a no…	Fuel	NA	162361	195	NA	2017-05-01	2017-05-01	190	200	10.1016/j.fuel.2017.01.065	0	FALSE	FALSE	NA	Journal	Ã‚Â© 2017 Elsevier Ltd. All rights reserved.	S0016-2361(17)30073-X	85010288049	2-s2.0-85010288049	Glycerol is available in high volumes and at low costs as a byproduct of bio-diesel production. While combustion characteristics are poor, it is appealing to investigate potential reforming processes...	NA	NA	Full Length Article	Non-catalytic glycerol reforming | Syngas production | Numerical methods | Detailed chemistry | Partial oxidation | Pyrolysis	NA	syngas
215	1-s2.0-S0016236117302181	TRUE	DOI:10.1016/j.fuel.2017.02.067	https://api.elsevier.com/content/article/pii/S0016236117302181	Biofuel parameter dependence on waste fatsÃ¢â‚¬â„¢ fatty acids profile	W., Golimowski	Abstract Many studies have focused on biofuel development from non-food biomass. Second generation biofuels (2G) manufactured from waste/recycled greases and animal fats are one of the alternatives to the first generation (1G) plant oil-based biofuels. In this study, the 2G biofuel parameter dependence on waste fatsÃ¢â‚¬â„¢ fatty acids profile was examined. The methyl esters parameters included d…	Fuel	NA	162361	197	NA	2017-06-01	2017-06-01	482	487	10.1016/j.fuel.2017.02.067	0	FALSE	FALSE	NA	Journal	Ã‚Â© 2017 Elsevier Ltd. All rights reserved.	S0016-2361(17)30218-1	85013748825	2-s2.0-85013748825	Many studies have focused on biofuel development from non-food biomass. Second generation biofuels (2G) manufactured from waste/recycled greases and animal fats are one of the alternatives to the first...	NA	NA	Full Length Article	Waste cooking oil | Animal fat biofuel | Density of biofuel | Viscosity of biofuel | Transesterification reaction	NA	animal_fats
216	1-s2.0-S0016236117302181	TRUE	DOI:10.1016/j.fuel.2017.02.067	https://api.elsevier.com/content/article/pii/S0016236117302181	Biofuel parameter dependence on waste fatsÃ¢â‚¬â„¢ fatty acids profile	W., Golimowski	Abstract Many studies have focused on biofuel development from non-food biomass. Second generation biofuels (2G) manufactured from waste/recycled greases and animal fats are one of the alternatives to the first generation (1G) plant oil-based biofuels. In this study, the 2G biofuel parameter dependence on waste fatsÃ¢â‚¬â„¢ fatty acids profile was examined. The methyl esters parameters included d…	Fuel	NA	162361	197	NA	2017-06-01	2017-06-01	482	487	10.1016/j.fuel.2017.02.067	0	FALSE	FALSE	NA	Journal	Ã‚Â© 2017 Elsevier Ltd. All rights reserved.	S0016-2361(17)30218-1	85013748825	2-s2.0-85013748825	Many studies have focused on biofuel development from non-food biomass. Second generation biofuels (2G) manufactured from waste/recycled greases and animal fats are one of the alternatives to the first...	NA	NA	Full Length Article	Waste cooking oil | Animal fat biofuel | Density of biofuel | Viscosity of biofuel | Transesterification reaction	NA	methanol
217	1-s2.0-S0016236117303976	TRUE	DOI:10.1016/j.fuel.2017.04.017	https://api.elsevier.com/content/article/pii/S0016236117303976	Temperature and gasifying media effects on chicken manure pyrolysis and gasification	M.S., Hussein	Abstract Continuous increase in chicken meat consumption calls for the chicken industry for unpreceded dense chicken production and associated waste production. The chicken farms produce large amounts of chicken manure that can no longer be directly used as a fertilizer due to concerns of land pollution and water bodies eutrophication. The gasification of chicken manure can convert the negative e…	Fuel	NA	162361	202	NA	2017-08-15	2017-08-15	36	45	10.1016/j.fuel.2017.04.017	0	FALSE	FALSE	NA	Journal	Ã‚Â© 2017 Elsevier Ltd. All rights reserved.	S0016-2361(17)30397-6	85017314700	2-s2.0-85017314700	Continuous increase in chicken meat consumption calls for the chicken industry for unpreceded dense chicken production and associated waste production. The chicken farms produce large amounts of chicken...	NA	NA	NA	Steam and CO2 gasification | Chicken manure | Biomass | Evolved syngas analysis | Renewable energy | Pyrolysis and air gasification	NA	poultry_manure
218	1-s2.0-S0016236117303976	TRUE	DOI:10.1016/j.fuel.2017.04.017	https://api.elsevier.com/content/article/pii/S0016236117303976	Temperature and gasifying media effects on chicken manure pyrolysis and gasification	M.S., Hussein	Abstract Continuous increase in chicken meat consumption calls for the chicken industry for unpreceded dense chicken production and associated waste production. The chicken farms produce large amounts of chicken manure that can no longer be directly used as a fertilizer due to concerns of land pollution and water bodies eutrophication. The gasification of chicken manure can convert the negative e…	Fuel	NA	162361	202	NA	2017-08-15	2017-08-15	36	45	10.1016/j.fuel.2017.04.017	0	FALSE	FALSE	NA	Journal	Ã‚Â© 2017 Elsevier Ltd. All rights reserved.	S0016-2361(17)30397-6	85017314700	2-s2.0-85017314700	Continuous increase in chicken meat consumption calls for the chicken industry for unpreceded dense chicken production and associated waste production. The chicken farms produce large amounts of chicken...	NA	NA	NA	Steam and CO2 gasification | Chicken manure | Biomass | Evolved syngas analysis | Renewable energy | Pyrolysis and air gasification	NA	fertilizer
219	1-s2.0-S0016236117303976	TRUE	DOI:10.1016/j.fuel.2017.04.017	https://api.elsevier.com/content/article/pii/S0016236117303976	Temperature and gasifying media effects on chicken manure pyrolysis and gasification	M.S., Hussein	Abstract Continuous increase in chicken meat consumption calls for the chicken industry for unpreceded dense chicken production and associated waste production. The chicken farms produce large amounts of chicken manure that can no longer be directly used as a fertilizer due to concerns of land pollution and water bodies eutrophication. The gasification of chicken manure can convert the negative e…	Fuel	NA	162361	202	NA	2017-08-15	2017-08-15	36	45	10.1016/j.fuel.2017.04.017	0	FALSE	FALSE	NA	Journal	Ã‚Â© 2017 Elsevier Ltd. All rights reserved.	S0016-2361(17)30397-6	85017314700	2-s2.0-85017314700	Continuous increase in chicken meat consumption calls for the chicken industry for unpreceded dense chicken production and associated waste production. The chicken farms produce large amounts of chicken...	NA	NA	NA	Steam and CO2 gasification | Chicken manure | Biomass | Evolved syngas analysis | Renewable energy | Pyrolysis and air gasification	NA	syngas
220	1-s2.0-S0016236117306385	TRUE	DOI:10.1016/j.fuel.2017.05.063	https://api.elsevier.com/content/article/pii/S0016236117306385	Evaluation of straw with absorbed glycerol thermal degradation during pyrolysis and combustion by TG-FTIR and TG-GC/MS	Nerijus, StriÃ…Â«gas	Abstract Despite the interest in second generation biofuels produced from straw, an increased attention on the by-products (glycerol) of the biodiesel production still remains. With the increase of biodiesel production year by year, new possibilities for glycerol utilization attract more attention. One possible use of glycerol is as a binder material for straw or other biomass pellets production.…	Fuel	NA	162361	204	NA	2017-09-15	2017-09-15	227	235	10.1016/j.fuel.2017.05.063	0	FALSE	FALSE	NA	Journal	Ã‚Â© 2017 Elsevier Ltd. All rights reserved.	S0016-2361(17)30638-5	85019858956	2-s2.0-85019858956	Despite the interest in second generation biofuels produced from straw, an increased attention on the by-products (glycerol) of the biodiesel production still remains. With the increase of biodiesel...	NA	NA	Full Length Article	Glycerol | Evolved gas | TG-FTIR | TG-GC/MS | Pyrolysis | Combustion	NA	acrolein
221	1-s2.0-S0016236117306385	TRUE	DOI:10.1016/j.fuel.2017.05.063	https://api.elsevier.com/content/article/pii/S0016236117306385	Evaluation of straw with absorbed glycerol thermal degradation during pyrolysis and combustion by TG-FTIR and TG-GC/MS	Nerijus, StriÃ…Â«gas	Abstract Despite the interest in second generation biofuels produced from straw, an increased attention on the by-products (glycerol) of the biodiesel production still remains. With the increase of biodiesel production year by year, new possibilities for glycerol utilization attract more attention. One possible use of glycerol is as a binder material for straw or other biomass pellets production.…	Fuel	NA	162361	204	NA	2017-09-15	2017-09-15	227	235	10.1016/j.fuel.2017.05.063	0	FALSE	FALSE	NA	Journal	Ã‚Â© 2017 Elsevier Ltd. All rights reserved.	S0016-2361(17)30638-5	85019858956	2-s2.0-85019858956	Despite the interest in second generation biofuels produced from straw, an increased attention on the by-products (glycerol) of the biodiesel production still remains. With the increase of biodiesel...	NA	NA	Full Length Article	Glycerol | Evolved gas | TG-FTIR | TG-GC/MS | Pyrolysis | Combustion	NA	aldehydes
222	1-s2.0-S0016236117306385	TRUE	DOI:10.1016/j.fuel.2017.05.063	https://api.elsevier.com/content/article/pii/S0016236117306385	Evaluation of straw with absorbed glycerol thermal degradation during pyrolysis and combustion by TG-FTIR and TG-GC/MS	Nerijus, StriÃ…Â«gas	Abstract Despite the interest in second generation biofuels produced from straw, an increased attention on the by-products (glycerol) of the biodiesel production still remains. With the increase of biodiesel production year by year, new possibilities for glycerol utilization attract more attention. One possible use of glycerol is as a binder material for straw or other biomass pellets production.…	Fuel	NA	162361	204	NA	2017-09-15	2017-09-15	227	235	10.1016/j.fuel.2017.05.063	0	FALSE	FALSE	NA	Journal	Ã‚Â© 2017 Elsevier Ltd. All rights reserved.	S0016-2361(17)30638-5	85019858956	2-s2.0-85019858956	Despite the interest in second generation biofuels produced from straw, an increased attention on the by-products (glycerol) of the biodiesel production still remains. With the increase of biodiesel...	NA	NA	Full Length Article	Glycerol | Evolved gas | TG-FTIR | TG-GC/MS | Pyrolysis | Combustion	NA	glycerol
223	1-s2.0-S0016236117306385	TRUE	DOI:10.1016/j.fuel.2017.05.063	https://api.elsevier.com/content/article/pii/S0016236117306385	Evaluation of straw with absorbed glycerol thermal degradation during pyrolysis and combustion by TG-FTIR and TG-GC/MS	Nerijus, StriÃ…Â«gas	Abstract Despite the interest in second generation biofuels produced from straw, an increased attention on the by-products (glycerol) of the biodiesel production still remains. With the increase of biodiesel production year by year, new possibilities for glycerol utilization attract more attention. One possible use of glycerol is as a binder material for straw or other biomass pellets production.…	Fuel	NA	162361	204	NA	2017-09-15	2017-09-15	227	235	10.1016/j.fuel.2017.05.063	0	FALSE	FALSE	NA	Journal	Ã‚Â© 2017 Elsevier Ltd. All rights reserved.	S0016-2361(17)30638-5	85019858956	2-s2.0-85019858956	Despite the interest in second generation biofuels produced from straw, an increased attention on the by-products (glycerol) of the biodiesel production still remains. With the increase of biodiesel...	NA	NA	Full Length Article	Glycerol | Evolved gas | TG-FTIR | TG-GC/MS | Pyrolysis | Combustion	NA	dedicated_combustion_/_incineration
224	1-s2.0-S0016236117306385	TRUE	DOI:10.1016/j.fuel.2017.05.063	https://api.elsevier.com/content/article/pii/S0016236117306385	Evaluation of straw with absorbed glycerol thermal degradation during pyrolysis and combustion by TG-FTIR and TG-GC/MS	Nerijus, StriÃ…Â«gas	Abstract Despite the interest in second generation biofuels produced from straw, an increased attention on the by-products (glycerol) of the biodiesel production still remains. With the increase of biodiesel production year by year, new possibilities for glycerol utilization attract more attention. One possible use of glycerol is as a binder material for straw or other biomass pellets production.…	Fuel	NA	162361	204	NA	2017-09-15	2017-09-15	227	235	10.1016/j.fuel.2017.05.063	0	FALSE	FALSE	NA	Journal	Ã‚Â© 2017 Elsevier Ltd. All rights reserved.	S0016-2361(17)30638-5	85019858956	2-s2.0-85019858956	Despite the interest in second generation biofuels produced from straw, an increased attention on the by-products (glycerol) of the biodiesel production still remains. With the increase of biodiesel...	NA	NA	Full Length Article	Glycerol | Evolved gas | TG-FTIR | TG-GC/MS | Pyrolysis | Combustion	NA	formaldehyde
225	1-s2.0-S0016236117306385	TRUE	DOI:10.1016/j.fuel.2017.05.063	https://api.elsevier.com/content/article/pii/S0016236117306385	Evaluation of straw with absorbed glycerol thermal degradation during pyrolysis and combustion by TG-FTIR and TG-GC/MS	Nerijus, StriÃ…Â«gas	Abstract Despite the interest in second generation biofuels produced from straw, an increased attention on the by-products (glycerol) of the biodiesel production still remains. With the increase of biodiesel production year by year, new possibilities for glycerol utilization attract more attention. One possible use of glycerol is as a binder material for straw or other biomass pellets production.…	Fuel	NA	162361	204	NA	2017-09-15	2017-09-15	227	235	10.1016/j.fuel.2017.05.063	0	FALSE	FALSE	NA	Journal	Ã‚Â© 2017 Elsevier Ltd. All rights reserved.	S0016-2361(17)30638-5	85019858956	2-s2.0-85019858956	Despite the interest in second generation biofuels produced from straw, an increased attention on the by-products (glycerol) of the biodiesel production still remains. With the increase of biodiesel...	NA	NA	Full Length Article	Glycerol | Evolved gas | TG-FTIR | TG-GC/MS | Pyrolysis | Combustion	NA	acetaldehyde
226	1-s2.0-S0016236117310074	TRUE	DOI:10.1016/j.fuel.2017.08.024	https://api.elsevier.com/content/article/pii/S0016236117310074	Synthesis of oxygenated fuel additives via glycerol esterification with acetic acid over bio-derived carbon catalyst	P.U., Okoye	Abstract Glycerol derived from biodiesel (BD) production is oversupplied and requires urgent utilization. Hence, crude bio-derived glycerol was utilized as a carbon precursor for heterogeneous solid acid catalyst synthesis via partial sulphonation and carbonization in a single step. The as-synthesized catalyst was utilized to catalyze glycerol acetylation reaction with acetic acid to produce oxyg…	Fuel	NA	162361	209	NA	2017-12-01	2017-12-01	538	544	10.1016/j.fuel.2017.08.024	0	FALSE	FALSE	NA	Journal	Ã‚Â© 2017 Elsevier Ltd. All rights reserved.	S0016-2361(17)31007-4	85026899165	2-s2.0-85026899165	Glycerol derived from biodiesel (BD) production is oversupplied and requires urgent utilization. Hence, crude bio-derived glycerol was utilized as a carbon precursor for heterogeneous solid acid catalyst...	NA	NA	Full Length Article	Glycerol | Acetylation | Sulphonation | Deactivation | Heterogeneous | Catalyst	NA	fuel_oxygenate
227	1-s2.0-S0016236117310074	TRUE	DOI:10.1016/j.fuel.2017.08.024	https://api.elsevier.com/content/article/pii/S0016236117310074	Synthesis of oxygenated fuel additives via glycerol esterification with acetic acid over bio-derived carbon catalyst	P.U., Okoye	Abstract Glycerol derived from biodiesel (BD) production is oversupplied and requires urgent utilization. Hence, crude bio-derived glycerol was utilized as a carbon precursor for heterogeneous solid acid catalyst synthesis via partial sulphonation and carbonization in a single step. The as-synthesized catalyst was utilized to catalyze glycerol acetylation reaction with acetic acid to produce oxyg…	Fuel	NA	162361	209	NA	2017-12-01	2017-12-01	538	544	10.1016/j.fuel.2017.08.024	0	FALSE	FALSE	NA	Journal	Ã‚Â© 2017 Elsevier Ltd. All rights reserved.	S0016-2361(17)31007-4	85026899165	2-s2.0-85026899165	Glycerol derived from biodiesel (BD) production is oversupplied and requires urgent utilization. Hence, crude bio-derived glycerol was utilized as a carbon precursor for heterogeneous solid acid catalyst...	NA	NA	Full Length Article	Glycerol | Acetylation | Sulphonation | Deactivation | Heterogeneous | Catalyst	NA	acetic_acid
228	1-s2.0-S0016236117310074	TRUE	DOI:10.1016/j.fuel.2017.08.024	https://api.elsevier.com/content/article/pii/S0016236117310074	Synthesis of oxygenated fuel additives via glycerol esterification with acetic acid over bio-derived carbon catalyst	P.U., Okoye	Abstract Glycerol derived from biodiesel (BD) production is oversupplied and requires urgent utilization. Hence, crude bio-derived glycerol was utilized as a carbon precursor for heterogeneous solid acid catalyst synthesis via partial sulphonation and carbonization in a single step. The as-synthesized catalyst was utilized to catalyze glycerol acetylation reaction with acetic acid to produce oxyg…	Fuel	NA	162361	209	NA	2017-12-01	2017-12-01	538	544	10.1016/j.fuel.2017.08.024	0	FALSE	FALSE	NA	Journal	Ã‚Â© 2017 Elsevier Ltd. All rights reserved.	S0016-2361(17)31007-4	85026899165	2-s2.0-85026899165	Glycerol derived from biodiesel (BD) production is oversupplied and requires urgent utilization. Hence, crude bio-derived glycerol was utilized as a carbon precursor for heterogeneous solid acid catalyst...	NA	NA	Full Length Article	Glycerol | Acetylation | Sulphonation | Deactivation | Heterogeneous | Catalyst	NA	glycerol
229	1-s2.0-S0016236117310189	TRUE	DOI:10.1016/j.fuel.2017.08.033	https://api.elsevier.com/content/article/pii/S0016236117310189	Effect of operation temperature on anaerobic digestion of food waste: Performance and microbial analysis	Mi-Sun, Kim	Abstract Temperature is one of the crucial parameters on anaerobic digestion (AD); however, key differences in the microbial community found in AD remain poorly understood. In this work, thermophilic and mesophilic AD fed with food waste were compared examining the relationship between the structure of the microbial community and methane (CH4) production. The maximum CH4 yield, 0.23LCH4Ã‚Â·gCODad…	Fuel	NA	162361	209	NA	2017-12-01	2017-12-01	598	605	10.1016/j.fuel.2017.08.033	0	FALSE	FALSE	NA	Journal	Ã‚Â© 2017 Elsevier Ltd. All rights reserved.	S0016-2361(17)31018-9	85028436299	2-s2.0-85028436299	Temperature is one of the crucial parameters on anaerobic digestion (AD); however, key differences in the microbial community found in AD remain poorly understood. In this work, thermophilic and mesophilic...	NA	NA	Full Length Article	Anaerobic digestion | Food waste | Microbial community | Organic loading rate | Step feeding | Temperature	NA	lactate
230	1-s2.0-S0016236117310189	TRUE	DOI:10.1016/j.fuel.2017.08.033	https://api.elsevier.com/content/article/pii/S0016236117310189	Effect of operation temperature on anaerobic digestion of food waste: Performance and microbial analysis	Mi-Sun, Kim	Abstract Temperature is one of the crucial parameters on anaerobic digestion (AD); however, key differences in the microbial community found in AD remain poorly understood. In this work, thermophilic and mesophilic AD fed with food waste were compared examining the relationship between the structure of the microbial community and methane (CH4) production. The maximum CH4 yield, 0.23LCH4Ã‚Â·gCODad…	Fuel	NA	162361	209	NA	2017-12-01	2017-12-01	598	605	10.1016/j.fuel.2017.08.033	0	FALSE	FALSE	NA	Journal	Ã‚Â© 2017 Elsevier Ltd. All rights reserved.	S0016-2361(17)31018-9	85028436299	2-s2.0-85028436299	Temperature is one of the crucial parameters on anaerobic digestion (AD); however, key differences in the microbial community found in AD remain poorly understood. In this work, thermophilic and mesophilic...	NA	NA	Full Length Article	Anaerobic digestion | Food waste | Microbial community | Organic loading rate | Step feeding | Temperature	NA	food_leftovers
231	1-s2.0-S0016236117310293	TRUE	DOI:10.1016/j.fuel.2017.08.043	https://api.elsevier.com/content/article/pii/S0016236117310293	Investigation of glycerol-derived binary and ternary systems in CO2 capture process	Zhaohe, Huang	Abstract Glycerol, an abundant byproduct in biodiesel industry process, has received a lot of attention in recent years. In this work, a series of glycerol-derived binary and ternary CO2 binding organic liquids (CO2BOLs), were proposed for carbon capture. Physical properties, 1H NMR spectra and FT-IR spectra of these systems were studied to describe the multiple interactions between constituents.…	Fuel	NA	162361	210	NA	2017-12-15	2017-12-15	836	843	10.1016/j.fuel.2017.08.043	0	FALSE	FALSE	NA	Journal	Ã‚Â© 2017 Elsevier Ltd. All rights reserved.	S0016-2361(17)31029-3	85029855828	2-s2.0-85029855828	Glycerol, an abundant byproduct in biodiesel industry process, has received a lot of attention in recent years. In this work, a series of glycerol-derived binary and ternary CO2 binding organic liquids...	NA	NA	Full Length Article	Carbon dioxide capture | Deep eutectic solvents | CO2BOLs | Glycerol	NA	glycerol
232	1-s2.0-S001623611731030X	TRUE	DOI:10.1016/j.fuel.2017.08.045	https://api.elsevier.com/content/article/pii/S001623611731030X	Effects of potassium and calcium on the early stages of combustion of single biomass particles	A., Carvalho	Abstract The main objective of this work is to evaluate the effects of potassium (K) and calcium (Ca) on the early stages of combustion of single biomass particles. The biomass used was grape pomace, sieved in the size range of 200Ã¢â‚¬â€œ250Ã‚Âµm. With the pre-treatments of demineralization and impregnation, a total of 12 different samples were obtained: raw grape pomace, demineralized grape pom…	Fuel	NA	162361	209	NA	2017-12-01	2017-12-01	787	794	10.1016/j.fuel.2017.08.045	0	FALSE	FALSE	NA	Journal	Ã‚Â© 2017 Elsevier Ltd. All rights reserved.	S0016-2361(17)31030-X	85027503910	2-s2.0-85027503910	The main objective of this work is to evaluate the effects of potassium (K) and calcium (Ca) on the early stages of combustion of single biomass particles. The biomass used was grape pomace, sieved...	NA	NA	Full length article	Single particle | Biomass | Potassium | Calcium | Ignition delay time | Volatiles combustion time	NA	dedicated_combustion_/_incineration
233	1-s2.0-S001623611731030X	TRUE	DOI:10.1016/j.fuel.2017.08.045	https://api.elsevier.com/content/article/pii/S001623611731030X	Effects of potassium and calcium on the early stages of combustion of single biomass particles	A., Carvalho	Abstract The main objective of this work is to evaluate the effects of potassium (K) and calcium (Ca) on the early stages of combustion of single biomass particles. The biomass used was grape pomace, sieved in the size range of 200Ã¢â‚¬â€œ250Ã‚Âµm. With the pre-treatments of demineralization and impregnation, a total of 12 different samples were obtained: raw grape pomace, demineralized grape pom…	Fuel	NA	162361	209	NA	2017-12-01	2017-12-01	787	794	10.1016/j.fuel.2017.08.045	0	FALSE	FALSE	NA	Journal	Ã‚Â© 2017 Elsevier Ltd. All rights reserved.	S0016-2361(17)31030-X	85027503910	2-s2.0-85027503910	The main objective of this work is to evaluate the effects of potassium (K) and calcium (Ca) on the early stages of combustion of single biomass particles. The biomass used was grape pomace, sieved...	NA	NA	Full length article	Single particle | Biomass | Potassium | Calcium | Ignition delay time | Volatiles combustion time	NA	grape_marc
234	1-s2.0-S0016236117312371	TRUE	DOI:10.1016/j.fuel.2017.09.118	https://api.elsevier.com/content/article/pii/S0016236117312371	Evaluation of the combustion characteristics of raw and torrefied grape pomace in a thermogravimetric analyzer and in a drop tube furnace	TomÃƒÂ¡s, Botelho	Abstract Grape pomace is a by-product of the wine making industry with great availability and energetic potential. Torrefaction is a pre-treatment that may enhance the biomass quality as a fuel, and consists in exposing the biomass to an inert atmosphere at a temperature between 200Ã¢â‚¬Â¯Ã‚Â°C and 300Ã¢â‚¬Â¯Ã‚Â°C. This study evaluates the combustion characteristics of raw and torrefied grape pom…	Fuel	NA	162361	212	NA	2018-01-15	2018-01-15	95	100	10.1016/j.fuel.2017.09.118	0	FALSE	FALSE	NA	Journal	Ã‚Â© 2017 Elsevier Ltd. All rights reserved.	S0016-2361(17)31237-1	85031113665	2-s2.0-85031113665	Grape pomace is a by-product of the wine making industry with great availability and energetic potential. Torrefaction is a pre-treatment that may enhance the biomass quality as a fuel, and consists...	NA	NA	Full Length Article	Grape pomace | Torrefaction | Thermogravimetric analyzer | Drop tube furnace	NA	grape_marc
235	1-s2.0-S0016236117312371	TRUE	DOI:10.1016/j.fuel.2017.09.118	https://api.elsevier.com/content/article/pii/S0016236117312371	Evaluation of the combustion characteristics of raw and torrefied grape pomace in a thermogravimetric analyzer and in a drop tube furnace	TomÃƒÂ¡s, Botelho	Abstract Grape pomace is a by-product of the wine making industry with great availability and energetic potential. Torrefaction is a pre-treatment that may enhance the biomass quality as a fuel, and consists in exposing the biomass to an inert atmosphere at a temperature between 200Ã¢â‚¬Â¯Ã‚Â°C and 300Ã¢â‚¬Â¯Ã‚Â°C. This study evaluates the combustion characteristics of raw and torrefied grape pom…	Fuel	NA	162361	212	NA	2018-01-15	2018-01-15	95	100	10.1016/j.fuel.2017.09.118	0	FALSE	FALSE	NA	Journal	Ã‚Â© 2017 Elsevier Ltd. All rights reserved.	S0016-2361(17)31237-1	85031113665	2-s2.0-85031113665	Grape pomace is a by-product of the wine making industry with great availability and energetic potential. Torrefaction is a pre-treatment that may enhance the biomass quality as a fuel, and consists...	NA	NA	Full Length Article	Grape pomace | Torrefaction | Thermogravimetric analyzer | Drop tube furnace	NA	torrefaction
236	1-s2.0-S0016236117312371	TRUE	DOI:10.1016/j.fuel.2017.09.118	https://api.elsevier.com/content/article/pii/S0016236117312371	Evaluation of the combustion characteristics of raw and torrefied grape pomace in a thermogravimetric analyzer and in a drop tube furnace	TomÃƒÂ¡s, Botelho	Abstract Grape pomace is a by-product of the wine making industry with great availability and energetic potential. Torrefaction is a pre-treatment that may enhance the biomass quality as a fuel, and consists in exposing the biomass to an inert atmosphere at a temperature between 200Ã¢â‚¬Â¯Ã‚Â°C and 300Ã¢â‚¬Â¯Ã‚Â°C. This study evaluates the combustion characteristics of raw and torrefied grape pom…	Fuel	NA	162361	212	NA	2018-01-15	2018-01-15	95	100	10.1016/j.fuel.2017.09.118	0	FALSE	FALSE	NA	Journal	Ã‚Â© 2017 Elsevier Ltd. All rights reserved.	S0016-2361(17)31237-1	85031113665	2-s2.0-85031113665	Grape pomace is a by-product of the wine making industry with great availability and energetic potential. Torrefaction is a pre-treatment that may enhance the biomass quality as a fuel, and consists...	NA	NA	Full Length Article	Grape pomace | Torrefaction | Thermogravimetric analyzer | Drop tube furnace	NA	dedicated_combustion_/_incineration
237	1-s2.0-S0016236117313315	TRUE	DOI:10.1016/j.fuel.2017.10.080	https://api.elsevier.com/content/article/pii/S0016236117313315	Novel in situ tribo-catalysis for improved tribological properties of bio-oil model compound	Yubin, Peng	Abstract A novel in situ tribocatalytic esterification reaction has been developed driven by frictional processes, to alleviate the corrosion wear induced by the high content of organic acid in bio-oil. Solid superacid (SO42Ã¢Ë†â€™/ÃŽÂ³-Al2O3) was formulated and prepared as the catalyst. Acetic acid was as the base for the bio-oil, and glycerol was used as a modifying agent. The tribological prop…	Fuel	NA	162361	212	NA	2018-01-15	2018-01-15	546	553	10.1016/j.fuel.2017.10.080	0	FALSE	FALSE	NA	Journal	Ã‚Â© 2017 Elsevier Ltd. All rights reserved.	S0016-2361(17)31331-5	85032261826	2-s2.0-85032261826	A novel in situ tribocatalytic esterification reaction has been developed driven by frictional processes, to alleviate the corrosion wear induced by the high content of organic acid in bio-oil. Solid...	NA	NA	Full Length Article	Bio-oil | Solid superacid | Esterification | Tribo-catalysis	NA	glycerol
238	1-s2.0-S0016236117313315	TRUE	DOI:10.1016/j.fuel.2017.10.080	https://api.elsevier.com/content/article/pii/S0016236117313315	Novel in situ tribo-catalysis for improved tribological properties of bio-oil model compound	Yubin, Peng	Abstract A novel in situ tribocatalytic esterification reaction has been developed driven by frictional processes, to alleviate the corrosion wear induced by the high content of organic acid in bio-oil. Solid superacid (SO42Ã¢Ë†â€™/ÃŽÂ³-Al2O3) was formulated and prepared as the catalyst. Acetic acid was as the base for the bio-oil, and glycerol was used as a modifying agent. The tribological prop…	Fuel	NA	162361	212	NA	2018-01-15	2018-01-15	546	553	10.1016/j.fuel.2017.10.080	0	FALSE	FALSE	NA	Journal	Ã‚Â© 2017 Elsevier Ltd. All rights reserved.	S0016-2361(17)31331-5	85032261826	2-s2.0-85032261826	A novel in situ tribocatalytic esterification reaction has been developed driven by frictional processes, to alleviate the corrosion wear induced by the high content of organic acid in bio-oil. Solid...	NA	NA	Full Length Article	Bio-oil | Solid superacid | Esterification | Tribo-catalysis	NA	acetic_acid
239	1-s2.0-S0016236117313595	TRUE	DOI:10.1016/j.fuel.2017.10.101	https://api.elsevier.com/content/article/pii/S0016236117313595	Economic evaluation of synthetic ethanol production by using domestic biowastes and coal mixture	You Ra, Gwak	Abstract Biowastes, such as cow manure, waste paper, and wood waste, are recognized as an essential source of renewable energy, and their importance increased significantly over time. However, the insufficient supply of biowastes for commercial thermochemical conversion processes is a major problem that needs to be addressed. Therefore, the co-utilization of biowastes and coal has been developed …	Fuel	NA	162361	213	NA	2018-02-01	2018-02-01	115	122	10.1016/j.fuel.2017.10.101	0	FALSE	FALSE	NA	Journal	Ã‚Â© 2017 Elsevier Ltd. All rights reserved.	S0016-2361(17)31359-5	85032508126	2-s2.0-85032508126	Biowastes, such as cow manure, waste paper, and wood waste, are recognized as an essential source of renewable energy, and their importance increased significantly over time. However, the insufficient...	NA	NA	Full Length Article	Biomass waste | Conversion | Alcohol | Feasibility study | Sensitivity analysis	NA	cattle_manure
240	1-s2.0-S0016236117313595	TRUE	DOI:10.1016/j.fuel.2017.10.101	https://api.elsevier.com/content/article/pii/S0016236117313595	Economic evaluation of synthetic ethanol production by using domestic biowastes and coal mixture	You Ra, Gwak	Abstract Biowastes, such as cow manure, waste paper, and wood waste, are recognized as an essential source of renewable energy, and their importance increased significantly over time. However, the insufficient supply of biowastes for commercial thermochemical conversion processes is a major problem that needs to be addressed. Therefore, the co-utilization of biowastes and coal has been developed …	Fuel	NA	162361	213	NA	2018-02-01	2018-02-01	115	122	10.1016/j.fuel.2017.10.101	0	FALSE	FALSE	NA	Journal	Ã‚Â© 2017 Elsevier Ltd. All rights reserved.	S0016-2361(17)31359-5	85032508126	2-s2.0-85032508126	Biowastes, such as cow manure, waste paper, and wood waste, are recognized as an essential source of renewable energy, and their importance increased significantly over time. However, the insufficient...	NA	NA	Full Length Article	Biomass waste | Conversion | Alcohol | Feasibility study | Sensitivity analysis	NA	ethanol_/_bioethanol
241	1-s2.0-S0016236117313595	TRUE	DOI:10.1016/j.fuel.2017.10.101	https://api.elsevier.com/content/article/pii/S0016236117313595	Economic evaluation of synthetic ethanol production by using domestic biowastes and coal mixture	You Ra, Gwak	Abstract Biowastes, such as cow manure, waste paper, and wood waste, are recognized as an essential source of renewable energy, and their importance increased significantly over time. However, the insufficient supply of biowastes for commercial thermochemical conversion processes is a major problem that needs to be addressed. Therefore, the co-utilization of biowastes and coal has been developed …	Fuel	NA	162361	213	NA	2018-02-01	2018-02-01	115	122	10.1016/j.fuel.2017.10.101	0	FALSE	FALSE	NA	Journal	Ã‚Â© 2017 Elsevier Ltd. All rights reserved.	S0016-2361(17)31359-5	85032508126	2-s2.0-85032508126	Biowastes, such as cow manure, waste paper, and wood waste, are recognized as an essential source of renewable energy, and their importance increased significantly over time. However, the insufficient...	NA	NA	Full Length Article	Biomass waste | Conversion | Alcohol | Feasibility study | Sensitivity analysis	NA	used_paper
242	1-s2.0-S0016236117313960	TRUE	DOI:10.1016/j.fuel.2017.11.007	https://api.elsevier.com/content/article/pii/S0016236117313960	Mesophilic anaerobic co-digestion of sewage sludge with glycerine: Effect of solids retention time	S., Zahedi	Abstract The main objective of this paper is to examine the effect of the increase in organic loading rates (OLRs), by reducing the solids retention time (SRT) from 20Ã¢â‚¬Â¯d to 5Ã¢â‚¬Â¯d, in single-phase mesophilic anaerobic co-digestion of sewage sludge with glycerine (1%Ã¢â‚¬Â¯v/v). It was experimentally confirmed that anaerobic co-digestion of these biowastes under steady-state conditions ca…	Fuel	NA	162361	215	NA	2018-03-01	2018-03-01	285	289	10.1016/j.fuel.2017.11.007	0	FALSE	FALSE	NA	Journal	Ã‚Â© 2017 Elsevier Ltd. All rights reserved.	S0016-2361(17)31396-0	85034065337	2-s2.0-85034065337	The main objective of this paper is to examine the effect of the increase in organic loading rates (OLRs), by reducing the solids retention time (SRT) from 20Ã¢â‚¬Â¯d to 5Ã¢â‚¬Â¯d, in single-phase mesophilic anaerobic...	NA	NA	Full Length Article	Anaerobic co-digestion | Biogas | SRT | Mesophilic | Sewage sludge | Glycerine	NA	glycerol
243	1-s2.0-S0016236117314291	TRUE	DOI:10.1016/j.fuel.2017.11.027	https://api.elsevier.com/content/article/pii/S0016236117314291	Pelletization properties of raw and torrefied pine sawdust: Effect of co-pelletization, temperature, moisture content and glycerol addition	Roberto, GarcÃƒÂ­a	Abstract Biomass shows characteristics that makes it a promising feedstock for complementing traditional fossil fuels as main energy source. It is somewhat limited by its generally poor physical properties, but these can be enhanced by densification processes like torrefaction and pelletization.The aim of the present work is to evaluate the influence of different solid biomass additives (almond s…	Fuel	NA	162361	215	NA	2018-03-01	2018-03-01	290	297	10.1016/j.fuel.2017.11.027	0	FALSE	FALSE	NA	Journal	Ã‚Â© 2017 Elsevier Ltd. All rights reserved.	S0016-2361(17)31429-1	85034067955	2-s2.0-85034067955	Biomass shows characteristics that makes it a promising feedstock for complementing traditional fossil fuels as main energy source. It is somewhat limited by its generally poor physical properties,...	NA	NA	Full Length Article	Biomass | Torrefaction | Pelletization | Combustion | Energy density	NA	torrefaction
244	1-s2.0-S0016236117314291	TRUE	DOI:10.1016/j.fuel.2017.11.027	https://api.elsevier.com/content/article/pii/S0016236117314291	Pelletization properties of raw and torrefied pine sawdust: Effect of co-pelletization, temperature, moisture content and glycerol addition	Roberto, GarcÃƒÂ­a	Abstract Biomass shows characteristics that makes it a promising feedstock for complementing traditional fossil fuels as main energy source. It is somewhat limited by its generally poor physical properties, but these can be enhanced by densification processes like torrefaction and pelletization.The aim of the present work is to evaluate the influence of different solid biomass additives (almond s…	Fuel	NA	162361	215	NA	2018-03-01	2018-03-01	290	297	10.1016/j.fuel.2017.11.027	0	FALSE	FALSE	NA	Journal	Ã‚Â© 2017 Elsevier Ltd. All rights reserved.	S0016-2361(17)31429-1	85034067955	2-s2.0-85034067955	Biomass shows characteristics that makes it a promising feedstock for complementing traditional fossil fuels as main energy source. It is somewhat limited by its generally poor physical properties,...	NA	NA	Full Length Article	Biomass | Torrefaction | Pelletization | Combustion | Energy density	NA	cocoa_shell
245	1-s2.0-S0016236117314291	TRUE	DOI:10.1016/j.fuel.2017.11.027	https://api.elsevier.com/content/article/pii/S0016236117314291	Pelletization properties of raw and torrefied pine sawdust: Effect of co-pelletization, temperature, moisture content and glycerol addition	Roberto, GarcÃƒÂ­a	Abstract Biomass shows characteristics that makes it a promising feedstock for complementing traditional fossil fuels as main energy source. It is somewhat limited by its generally poor physical properties, but these can be enhanced by densification processes like torrefaction and pelletization.The aim of the present work is to evaluate the influence of different solid biomass additives (almond s…	Fuel	NA	162361	215	NA	2018-03-01	2018-03-01	290	297	10.1016/j.fuel.2017.11.027	0	FALSE	FALSE	NA	Journal	Ã‚Â© 2017 Elsevier Ltd. All rights reserved.	S0016-2361(17)31429-1	85034067955	2-s2.0-85034067955	Biomass shows characteristics that makes it a promising feedstock for complementing traditional fossil fuels as main energy source. It is somewhat limited by its generally poor physical properties,...	NA	NA	Full Length Article	Biomass | Torrefaction | Pelletization | Combustion | Energy density	NA	grape_marc
246	1-s2.0-S0016236117314291	TRUE	DOI:10.1016/j.fuel.2017.11.027	https://api.elsevier.com/content/article/pii/S0016236117314291	Pelletization properties of raw and torrefied pine sawdust: Effect of co-pelletization, temperature, moisture content and glycerol addition	Roberto, GarcÃƒÂ­a	Abstract Biomass shows characteristics that makes it a promising feedstock for complementing traditional fossil fuels as main energy source. It is somewhat limited by its generally poor physical properties, but these can be enhanced by densification processes like torrefaction and pelletization.The aim of the present work is to evaluate the influence of different solid biomass additives (almond s…	Fuel	NA	162361	215	NA	2018-03-01	2018-03-01	290	297	10.1016/j.fuel.2017.11.027	0	FALSE	FALSE	NA	Journal	Ã‚Â© 2017 Elsevier Ltd. All rights reserved.	S0016-2361(17)31429-1	85034067955	2-s2.0-85034067955	Biomass shows characteristics that makes it a promising feedstock for complementing traditional fossil fuels as main energy source. It is somewhat limited by its generally poor physical properties,...	NA	NA	Full Length Article	Biomass | Torrefaction | Pelletization | Combustion | Energy density	NA	briquette_/_pellet_fuel
247	1-s2.0-S0016236117314424	TRUE	DOI:10.1016/j.fuel.2017.11.040	https://api.elsevier.com/content/article/pii/S0016236117314424	The effects of an additive on the release of potassium in biomass combustion	Diarmaid S., Clery	Abstract This study focuses on the effects of an aluminosilicate additive on the fate of potassium during biomass combustion. Such additives have shown some success in mitigating slagging and fouling problems in boilers and furnaces, and the mobility of potassium in combustion systems is one of the key factors dictating ash behaviour. To investigate this, a flame emission spectroscopy technique w…	Fuel	NA	162361	214	NA	2018-02-15	2018-02-15	647	655	10.1016/j.fuel.2017.11.040	1	TRUE	FALSE	http://creativecommons.org/licenses/by/4.0/	Journal	Ã‚Â© 2017 The Authors. Published by Elsevier Ltd.	S0016-2361(17)31442-4	85034842056	2-s2.0-85034842056	This study focuses on the effects of an aluminosilicate additive on the fate of potassium during biomass combustion. Such additives have shown some success in mitigating slagging and fouling problems...	NA	NA	Full Length Article	Biomass combustion | Fouling | Potassium | Ash | Additives	NA	dedicated_combustion_/_incineration
248	1-s2.0-S0016236117314424	TRUE	DOI:10.1016/j.fuel.2017.11.040	https://api.elsevier.com/content/article/pii/S0016236117314424	The effects of an additive on the release of potassium in biomass combustion	Diarmaid S., Clery	Abstract This study focuses on the effects of an aluminosilicate additive on the fate of potassium during biomass combustion. Such additives have shown some success in mitigating slagging and fouling problems in boilers and furnaces, and the mobility of potassium in combustion systems is one of the key factors dictating ash behaviour. To investigate this, a flame emission spectroscopy technique w…	Fuel	NA	162361	214	NA	2018-02-15	2018-02-15	647	655	10.1016/j.fuel.2017.11.040	1	TRUE	FALSE	http://creativecommons.org/licenses/by/4.0/	Journal	Ã‚Â© 2017 The Authors. Published by Elsevier Ltd.	S0016-2361(17)31442-4	85034842056	2-s2.0-85034842056	This study focuses on the effects of an aluminosilicate additive on the fate of potassium during biomass combustion. Such additives have shown some success in mitigating slagging and fouling problems...	NA	NA	Full Length Article	Biomass combustion | Fouling | Potassium | Ash | Additives	NA	wheat_straw
249	1-s2.0-S0016236117315867	TRUE	DOI:10.1016/j.fuel.2017.12.018	https://api.elsevier.com/content/article/pii/S0016236117315867	Catalytic valorization of biomass derived glycerol under methane: Effect of catalyst synthesis method	Danielle, Austin	Abstract The feasibility of upgrading glycerol using Zn, Cu and Ga modified ZSM-5 was investigated. Different catalyst synthesis techniques were compared for their performance on the aromatization of glycerol under a methane environment at 400Ã¢â‚¬Â¯Ã‚Â°C and initial pressure of 5Ã¢â‚¬Â¯bar. GCÃ¢â‚¬â€œMS analysis showed that the catalyst synthesized using deposition precipitation (DP) resulted in…	Fuel	NA	162361	216	NA	2018-03-15	2018-03-15	218	226	10.1016/j.fuel.2017.12.018	0	FALSE	FALSE	NA	Journal	Ã‚Â© 2017 Elsevier Ltd. All rights reserved.	S0016-2361(17)31586-7	85037689700	2-s2.0-85037689700	The feasibility of upgrading glycerol using Zn, Cu and Ga modified ZSM-5 was investigated. Different catalyst synthesis techniques were compared for their performance on the aromatization of glycerol...	NA	NA	Full Length Article	Glycerol | Catalyst | Aromatization | ZSM-5	NA	glycerol
250	1-s2.0-S0016236117315867	TRUE	DOI:10.1016/j.fuel.2017.12.018	https://api.elsevier.com/content/article/pii/S0016236117315867	Catalytic valorization of biomass derived glycerol under methane: Effect of catalyst synthesis method	Danielle, Austin	Abstract The feasibility of upgrading glycerol using Zn, Cu and Ga modified ZSM-5 was investigated. Different catalyst synthesis techniques were compared for their performance on the aromatization of glycerol under a methane environment at 400Ã¢â‚¬Â¯Ã‚Â°C and initial pressure of 5Ã¢â‚¬Â¯bar. GCÃ¢â‚¬â€œMS analysis showed that the catalyst synthesized using deposition precipitation (DP) resulted in…	Fuel	NA	162361	216	NA	2018-03-15	2018-03-15	218	226	10.1016/j.fuel.2017.12.018	0	FALSE	FALSE	NA	Journal	Ã‚Â© 2017 Elsevier Ltd. All rights reserved.	S0016-2361(17)31586-7	85037689700	2-s2.0-85037689700	The feasibility of upgrading glycerol using Zn, Cu and Ga modified ZSM-5 was investigated. Different catalyst synthesis techniques were compared for their performance on the aromatization of glycerol...	NA	NA	Full Length Article	Glycerol | Catalyst | Aromatization | ZSM-5	NA	biodiesel
251	1-s2.0-S0016236117316915	TRUE	DOI:10.1016/j.fuel.2017.12.108	https://api.elsevier.com/content/article/pii/S0016236117316915	Enhanced production of microbial lipids from waste office paper by the oleaginous yeast Cryptococcus curvatus	Neelamegam, Annamalai	Abstract Waste paper has a potential to serve as renewable feedstock for the biorefineries of fuels, chemicals and materials due to rich in cellulose and its abundance at low cost. In the present study, pretreated waste office paper (WOP) was enzymatically hydrolysed and used for lipid production by Cryptococcus curvatus. The results suggested that the WOP hydrolysate supplemented with ammonium s…	Fuel	NA	162361	217	NA	2018-04-01	2018-04-01	420	426	10.1016/j.fuel.2017.12.108	0	FALSE	FALSE	NA	Journal	Ã‚Â© 2017 Elsevier Ltd. All rights reserved.	S0016-2361(17)31691-5	85039867993	2-s2.0-85039867993	Waste paper has a potential to serve as renewable feedstock for the biorefineries of fuels, chemicals and materials due to rich in cellulose and its abundance at low cost. In the present study, pretreated...	NA	NA	Full Length Article	Biodiesel | Waste office paper | Hydrolysate | Oleaginous yeast | Microbial lipids | Feedstock	NA	used_paper
252	1-s2.0-S0016236117316915	TRUE	DOI:10.1016/j.fuel.2017.12.108	https://api.elsevier.com/content/article/pii/S0016236117316915	Enhanced production of microbial lipids from waste office paper by the oleaginous yeast Cryptococcus curvatus	Neelamegam, Annamalai	Abstract Waste paper has a potential to serve as renewable feedstock for the biorefineries of fuels, chemicals and materials due to rich in cellulose and its abundance at low cost. In the present study, pretreated waste office paper (WOP) was enzymatically hydrolysed and used for lipid production by Cryptococcus curvatus. The results suggested that the WOP hydrolysate supplemented with ammonium s…	Fuel	NA	162361	217	NA	2018-04-01	2018-04-01	420	426	10.1016/j.fuel.2017.12.108	0	FALSE	FALSE	NA	Journal	Ã‚Â© 2017 Elsevier Ltd. All rights reserved.	S0016-2361(17)31691-5	85039867993	2-s2.0-85039867993	Waste paper has a potential to serve as renewable feedstock for the biorefineries of fuels, chemicals and materials due to rich in cellulose and its abundance at low cost. In the present study, pretreated...	NA	NA	Full Length Article	Biodiesel | Waste office paper | Hydrolysate | Oleaginous yeast | Microbial lipids | Feedstock	NA	biodiesel
253	1-s2.0-S0016236118306367	TRUE	DOI:10.1016/j.fuel.2018.04.013	https://api.elsevier.com/content/article/pii/S0016236118306367	Lipid accumulation from Trichosporon oleaginosus with co-fermentation of washed wastewater sludge and crude glycerol	Xiaolei, Zhang	Abstract In this study, two types of organic waste including sludge and crude glycerol were employed for lipid production from oleaginous yeast Trichosporon oleaginosus. As wastewater sludge contains metals and other substances, which could inhibit growth of the microorganisms, sludge washing was performed to reduce/remove the substance in order to enhance the lipid production in this study. The …	Fuel	NA	162361	226	NA	2018-08-15	2018-08-15	93	102	10.1016/j.fuel.2018.04.013	0	FALSE	FALSE	NA	Journal	Ã‚Â© 2018 Elsevier Ltd. All rights reserved.	S0016-2361(18)30636-7	85044970959	2-s2.0-85044970959	In this study, two types of organic waste including sludge and crude glycerol were employed for lipid production from oleaginous yeast Trichosporon oleaginosus. As wastewater sludge contains metals...	NA	NA	Full Length Article	Lipid | Biodiesel | Sludge | Crude glycerol | Sludge washing | Inhibition	NA	wastewaster_sludge
254	1-s2.0-S0016236118306367	TRUE	DOI:10.1016/j.fuel.2018.04.013	https://api.elsevier.com/content/article/pii/S0016236118306367	Lipid accumulation from Trichosporon oleaginosus with co-fermentation of washed wastewater sludge and crude glycerol	Xiaolei, Zhang	Abstract In this study, two types of organic waste including sludge and crude glycerol were employed for lipid production from oleaginous yeast Trichosporon oleaginosus. As wastewater sludge contains metals and other substances, which could inhibit growth of the microorganisms, sludge washing was performed to reduce/remove the substance in order to enhance the lipid production in this study. The …	Fuel	NA	162361	226	NA	2018-08-15	2018-08-15	93	102	10.1016/j.fuel.2018.04.013	0	FALSE	FALSE	NA	Journal	Ã‚Â© 2018 Elsevier Ltd. All rights reserved.	S0016-2361(18)30636-7	85044970959	2-s2.0-85044970959	In this study, two types of organic waste including sludge and crude glycerol were employed for lipid production from oleaginous yeast Trichosporon oleaginosus. As wastewater sludge contains metals...	NA	NA	Full Length Article	Lipid | Biodiesel | Sludge | Crude glycerol | Sludge washing | Inhibition	NA	glycerol
255	1-s2.0-S0016236118309219	TRUE	DOI:10.1016/j.fuel.2018.05.097	https://api.elsevier.com/content/article/pii/S0016236118309219	Influence of the temperature in the yield and composition of the bio-oil from the pyrolysis of spent coffee grounds: Characterization by comprehensive two dimensional gas chromatography	Carmem T., Primaz	Abstract Coffee is an important agricultural product being one of the most consumed beverages in the world. The goal of this work is to apply the pyrolysis to this residue for the production of bio-oil. The pyrolysis of the biomass (SCG) was done in a fixed bed reactor and varying the final temperature (400, 450, 500, 550 and 600Ã¢â‚¬Â¯Ã‚Â°C). The higher crude bio-oil yield was obtained at 500Ã¢â…	Fuel	NA	162361	232	NA	2018-11-15	2018-11-15	572	580	10.1016/j.fuel.2018.05.097	0	FALSE	FALSE	NA	Journal	Ã‚Â© 2018 Elsevier Ltd. All rights reserved.	S0016-2361(18)30921-9	85048593637	2-s2.0-85048593637	Coffee is an important agricultural product being one of the most consumed beverages in the world. The goal of this work is to apply the pyrolysis to this residue for the production of bio-oil. The...	NA	NA	Full Length Article	Bio-oil | Pyrolysis | GCÃ¢â‚¬Â¯Ãƒâ€”Ã¢â‚¬Â¯GC-TOFMS	NA	malt_coffee_marc
256	1-s2.0-S0016236118309219	TRUE	DOI:10.1016/j.fuel.2018.05.097	https://api.elsevier.com/content/article/pii/S0016236118309219	Influence of the temperature in the yield and composition of the bio-oil from the pyrolysis of spent coffee grounds: Characterization by comprehensive two dimensional gas chromatography	Carmem T., Primaz	Abstract Coffee is an important agricultural product being one of the most consumed beverages in the world. The goal of this work is to apply the pyrolysis to this residue for the production of bio-oil. The pyrolysis of the biomass (SCG) was done in a fixed bed reactor and varying the final temperature (400, 450, 500, 550 and 600Ã¢â‚¬Â¯Ã‚Â°C). The higher crude bio-oil yield was obtained at 500Ã¢â…	Fuel	NA	162361	232	NA	2018-11-15	2018-11-15	572	580	10.1016/j.fuel.2018.05.097	0	FALSE	FALSE	NA	Journal	Ã‚Â© 2018 Elsevier Ltd. All rights reserved.	S0016-2361(18)30921-9	85048593637	2-s2.0-85048593637	Coffee is an important agricultural product being one of the most consumed beverages in the world. The goal of this work is to apply the pyrolysis to this residue for the production of bio-oil. The...	NA	NA	Full Length Article	Bio-oil | Pyrolysis | GCÃ¢â‚¬Â¯Ãƒâ€”Ã¢â‚¬Â¯GC-TOFMS	NA	fatty_acids		fatty_acids
257	1-s2.0-S0016236118312274	TRUE	DOI:10.1016/j.fuel.2018.07.029	https://api.elsevier.com/content/article/pii/S0016236118312274	Direct transesterification of Mucor circinelloides biomass for biodiesel production: Effect of carbon sources on the accumulation of fungal lipids and biofuel properties	Ana Karine F., Carvalho	Abstract The wild strain of Mucor circinelloides URM 4182 from a Brazilian culture collection was previously recognized as potential oleaginous microorganism that supplied single cell oil (SCO) with suitable properties for biodiesel synthesis. This work focused on assessing the accumulation of storage lipid by this strain grown in various media containing different carbon sources and the subseque…	Fuel	NA	162361	234	NA	2018-12-15	2018-12-15	789	796	10.1016/j.fuel.2018.07.029	0	FALSE	FALSE	NA	Journal	Ã‚Â© 2018 Elsevier Ltd. All rights reserved.	S0016-2361(18)31227-4	85050382397	2-s2.0-85050382397	The wild strain of Mucor circinelloides URM 4182 from a Brazilian culture collection was previously recognized as potential oleaginous microorganism that supplied single cell oil (SCO) with suitable...	NA	NA	Full Length Article	Carbon sources | Lipid | Fatty acid profile | Transesterification | Ethyl esters | Heteropolyacid	NA	biodiesel
258	1-s2.0-S0016236118312274	TRUE	DOI:10.1016/j.fuel.2018.07.029	https://api.elsevier.com/content/article/pii/S0016236118312274	Direct transesterification of Mucor circinelloides biomass for biodiesel production: Effect of carbon sources on the accumulation of fungal lipids and biofuel properties	Ana Karine F., Carvalho	Abstract The wild strain of Mucor circinelloides URM 4182 from a Brazilian culture collection was previously recognized as potential oleaginous microorganism that supplied single cell oil (SCO) with suitable properties for biodiesel synthesis. This work focused on assessing the accumulation of storage lipid by this strain grown in various media containing different carbon sources and the subseque…	Fuel	NA	162361	234	NA	2018-12-15	2018-12-15	789	796	10.1016/j.fuel.2018.07.029	0	FALSE	FALSE	NA	Journal	Ã‚Â© 2018 Elsevier Ltd. All rights reserved.	S0016-2361(18)31227-4	85050382397	2-s2.0-85050382397	The wild strain of Mucor circinelloides URM 4182 from a Brazilian culture collection was previously recognized as potential oleaginous microorganism that supplied single cell oil (SCO) with suitable...	NA	NA	Full Length Article	Carbon sources | Lipid | Fatty acid profile | Transesterification | Ethyl esters | Heteropolyacid	NA	fatty_acids		fatty_acids
259	1-s2.0-S0016236118312274	TRUE	DOI:10.1016/j.fuel.2018.07.029	https://api.elsevier.com/content/article/pii/S0016236118312274	Direct transesterification of Mucor circinelloides biomass for biodiesel production: Effect of carbon sources on the accumulation of fungal lipids and biofuel properties	Ana Karine F., Carvalho	Abstract The wild strain of Mucor circinelloides URM 4182 from a Brazilian culture collection was previously recognized as potential oleaginous microorganism that supplied single cell oil (SCO) with suitable properties for biodiesel synthesis. This work focused on assessing the accumulation of storage lipid by this strain grown in various media containing different carbon sources and the subseque…	Fuel	NA	162361	234	NA	2018-12-15	2018-12-15	789	796	10.1016/j.fuel.2018.07.029	0	FALSE	FALSE	NA	Journal	Ã‚Â© 2018 Elsevier Ltd. All rights reserved.	S0016-2361(18)31227-4	85050382397	2-s2.0-85050382397	The wild strain of Mucor circinelloides URM 4182 from a Brazilian culture collection was previously recognized as potential oleaginous microorganism that supplied single cell oil (SCO) with suitable...	NA	NA	Full Length Article	Carbon sources | Lipid | Fatty acid profile | Transesterification | Ethyl esters | Heteropolyacid	NA	fructose
260	1-s2.0-S0016236118312274	TRUE	DOI:10.1016/j.fuel.2018.07.029	https://api.elsevier.com/content/article/pii/S0016236118312274	Direct transesterification of Mucor circinelloides biomass for biodiesel production: Effect of carbon sources on the accumulation of fungal lipids and biofuel properties	Ana Karine F., Carvalho	Abstract The wild strain of Mucor circinelloides URM 4182 from a Brazilian culture collection was previously recognized as potential oleaginous microorganism that supplied single cell oil (SCO) with suitable properties for biodiesel synthesis. This work focused on assessing the accumulation of storage lipid by this strain grown in various media containing different carbon sources and the subseque…	Fuel	NA	162361	234	NA	2018-12-15	2018-12-15	789	796	10.1016/j.fuel.2018.07.029	0	FALSE	FALSE	NA	Journal	Ã‚Â© 2018 Elsevier Ltd. All rights reserved.	S0016-2361(18)31227-4	85050382397	2-s2.0-85050382397	The wild strain of Mucor circinelloides URM 4182 from a Brazilian culture collection was previously recognized as potential oleaginous microorganism that supplied single cell oil (SCO) with suitable...	NA	NA	Full Length Article	Carbon sources | Lipid | Fatty acid profile | Transesterification | Ethyl esters | Heteropolyacid	NA	ethanol_/_bioethanol
261	1-s2.0-S0016236118312274	TRUE	DOI:10.1016/j.fuel.2018.07.029	https://api.elsevier.com/content/article/pii/S0016236118312274	Direct transesterification of Mucor circinelloides biomass for biodiesel production: Effect of carbon sources on the accumulation of fungal lipids and biofuel properties	Ana Karine F., Carvalho	Abstract The wild strain of Mucor circinelloides URM 4182 from a Brazilian culture collection was previously recognized as potential oleaginous microorganism that supplied single cell oil (SCO) with suitable properties for biodiesel synthesis. This work focused on assessing the accumulation of storage lipid by this strain grown in various media containing different carbon sources and the subseque…	Fuel	NA	162361	234	NA	2018-12-15	2018-12-15	789	796	10.1016/j.fuel.2018.07.029	0	FALSE	FALSE	NA	Journal	Ã‚Â© 2018 Elsevier Ltd. All rights reserved.	S0016-2361(18)31227-4	85050382397	2-s2.0-85050382397	The wild strain of Mucor circinelloides URM 4182 from a Brazilian culture collection was previously recognized as potential oleaginous microorganism that supplied single cell oil (SCO) with suitable...	NA	NA	Full Length Article	Carbon sources | Lipid | Fatty acid profile | Transesterification | Ethyl esters | Heteropolyacid	NA	glycerol
262	1-s2.0-S0016236199002471	TRUE	DOI:10.1016/S0016-2361(99)00247-1	https://api.elsevier.com/content/article/pii/S0016236199002471	A study of chlorine behavior in a simulated fluidized bed combustion system	K., Liu	Abstract Fluidized bed combustion techniques have been widely used throughout the world in an effort to reduce sulfur oxide emissions, especially from burning high-sulfur coal. However, in the utilization of FBC systems for co-firing high chlorine coals with municipal solid waste (MSW) there are some concerns about the possible emission of polychlorinated dibenzodioxins (PCDDs) and polychlorinate…	Fuel	NA	162361	79	9	2000-07-01	2000-07-01	1115	1124	10.1016/S0016-2361(99)00247-1	0	FALSE	FALSE	NA	Journal	Copyright Ã‚Â© 1999 Elsevier Science Ltd. All rights reserved.	S0016-2361(99)00247-1	33742741	2-s2.0-0033742741	Fluidized bed combustion techniques have been widely used throughout the world in an effort to reduce sulfur oxide emissions, especially from burning high-sulfur coal. However, in the utilization of...	NA	NA	NA	Chlorine behavior | Fluidized bed combustion system	NA	organic_housewaste
263	1-s2.0-S0016236199002471	TRUE	DOI:10.1016/S0016-2361(99)00247-1	https://api.elsevier.com/content/article/pii/S0016236199002471	A study of chlorine behavior in a simulated fluidized bed combustion system	K., Liu	Abstract Fluidized bed combustion techniques have been widely used throughout the world in an effort to reduce sulfur oxide emissions, especially from burning high-sulfur coal. However, in the utilization of FBC systems for co-firing high chlorine coals with municipal solid waste (MSW) there are some concerns about the possible emission of polychlorinated dibenzodioxins (PCDDs) and polychlorinate…	Fuel	NA	162361	79	9	2000-07-01	2000-07-01	1115	1124	10.1016/S0016-2361(99)00247-1	0	FALSE	FALSE	NA	Journal	Copyright Ã‚Â© 1999 Elsevier Science Ltd. All rights reserved.	S0016-2361(99)00247-1	33742741	2-s2.0-0033742741	Fluidized bed combustion techniques have been widely used throughout the world in an effort to reduce sulfur oxide emissions, especially from burning high-sulfur coal. However, in the utilization of...	NA	NA	NA	Chlorine behavior | Fluidized bed combustion system	NA	dedicated_combustion_/_incineration
264	1-s2.0-S0016703711006909	TRUE	DOI:10.1016/j.gca.2011.11.025	https://api.elsevier.com/content/article/pii/S0016703711006909	A re-evaluation of the use of branched GDGTs as terrestrial biomarkers: Implications for the BIT Index	Richard W., Smith	Abstract This study examines estimates of soil organic matter content (%OMsoil) in marine sediments based on the branched/isoprenoid tetraether (BIT) Index, and suggests a new calculation method based on branched GDGT (brGDGT) concentrations. Four sediment cores were collected in 2008 at the 20m isobath of the Louisiana Continental Shelf. Glycerol dialkyl glycerol tetraether (GDGTs) and cupric ox…	Geochimica et Cosmochimica Acta	NA	167037	80	NA	2012-03-01	2012-03-01	14	29	10.1016/j.gca.2011.11.025	0	FALSE	FALSE	NA	Journal	Copyright Ã‚Â© 2011 Elsevier Ltd. All rights reserved.	S0016-7037(11)00690-9	84855182524	2-s2.0-84855182524	This study examines estimates of soil organic matter content (%OMsoil) in marine sediments based on the branched/isoprenoid tetraether (BIT) Index, and suggests a new calculation method based on branched...	NA	NA	NA	NA	NA	glycerol
265	1-s2.0-S0016706104000205	TRUE	DOI:10.1016/j.geoderma.2004.01.016	https://api.elsevier.com/content/article/pii/S0016706104000205	Effect of organic wastes on the extractability of cadmium, copper, nickel, and zinc in soil	Ayten, Karaca	Abstract A soil incubation experiment lasting 6 months was carried out to ascertain the effects of tobacco dust, mushroom compost, and grape marc, which contain high organic matter, on the extractable cadmium, copper, nickel, and zinc in soil. The rates of organic wastes in its moist state added were 0%, 2%, 4%, and 8% of the air-dried soil on mass basis. Soil pH was decreased significantly in so…	Geoderma	NA	167061	122	2	2004-10-01	2004-10-01	297	303	10.1016/j.geoderma.2004.01.016	0	FALSE	FALSE	NA	Journal	Copyright Ã‚Â© 2004 Elsevier B.V. All rights reserved.	S0016-7061(04)00020-5	4444342940	2-s2.0-4444342940	A soil incubation experiment lasting 6 months was carried out to ascertain the effects of tobacco dust, mushroom compost, and grape marc, which contain high organic matter, on the extractable cadmium,...	NA	Biogeochemical processes and the role of heavy metals in the soil environment	NA	Organic wastes | Heavy metals | pH | Organic matter	NA	champost
266	1-s2.0-S0016706104000205	TRUE	DOI:10.1016/j.geoderma.2004.01.016	https://api.elsevier.com/content/article/pii/S0016706104000205	Effect of organic wastes on the extractability of cadmium, copper, nickel, and zinc in soil	Ayten, Karaca	Abstract A soil incubation experiment lasting 6 months was carried out to ascertain the effects of tobacco dust, mushroom compost, and grape marc, which contain high organic matter, on the extractable cadmium, copper, nickel, and zinc in soil. The rates of organic wastes in its moist state added were 0%, 2%, 4%, and 8% of the air-dried soil on mass basis. Soil pH was decreased significantly in so…	Geoderma	NA	167061	122	2	2004-10-01	2004-10-01	297	303	10.1016/j.geoderma.2004.01.016	0	FALSE	FALSE	NA	Journal	Copyright Ã‚Â© 2004 Elsevier B.V. All rights reserved.	S0016-7061(04)00020-5	4444342940	2-s2.0-4444342940	A soil incubation experiment lasting 6 months was carried out to ascertain the effects of tobacco dust, mushroom compost, and grape marc, which contain high organic matter, on the extractable cadmium,...	NA	Biogeochemical processes and the role of heavy metals in the soil environment	NA	Organic wastes | Heavy metals | pH | Organic matter	NA	compost
267	1-s2.0-S0016706104000205	TRUE	DOI:10.1016/j.geoderma.2004.01.016	https://api.elsevier.com/content/article/pii/S0016706104000205	Effect of organic wastes on the extractability of cadmium, copper, nickel, and zinc in soil	Ayten, Karaca	Abstract A soil incubation experiment lasting 6 months was carried out to ascertain the effects of tobacco dust, mushroom compost, and grape marc, which contain high organic matter, on the extractable cadmium, copper, nickel, and zinc in soil. The rates of organic wastes in its moist state added were 0%, 2%, 4%, and 8% of the air-dried soil on mass basis. Soil pH was decreased significantly in so…	Geoderma	NA	167061	122	2	2004-10-01	2004-10-01	297	303	10.1016/j.geoderma.2004.01.016	0	FALSE	FALSE	NA	Journal	Copyright Ã‚Â© 2004 Elsevier B.V. All rights reserved.	S0016-7061(04)00020-5	4444342940	2-s2.0-4444342940	A soil incubation experiment lasting 6 months was carried out to ascertain the effects of tobacco dust, mushroom compost, and grape marc, which contain high organic matter, on the extractable cadmium,...	NA	Biogeochemical processes and the role of heavy metals in the soil environment	NA	Organic wastes | Heavy metals | pH | Organic matter	NA	grape_marc
268	1-s2.0-S0016706108000955	TRUE	DOI:10.1016/j.geoderma.2008.03.020	https://api.elsevier.com/content/article/pii/S0016706108000955	Influence of two organic amendments on the soil physical properties, soil losses, sediments and runoff water quality	M., Tejada	Abstract Organic soil amendments are increasingly being examined for their potential use in preventing soil losses. The influence of two organic wastes (cotton gin crushed compost, CC, and poultry manure, PM) applied during a period of four years on a Xerollic Calciorthid under dryland conditions near to Seville (Guadalquivir Valley, Andalusia, Spain) on soil physical properties (structural insta…	Geoderma	NA	167061	145	3	2008-06-15	2008-06-15	325	334	10.1016/j.geoderma.2008.03.020	0	FALSE	FALSE	NA	Journal	Copyright Ã‚Â© 2008 Elsevier B.V. All rights reserved.	S0016-7061(08)00095-5	45449110383	2-s2.0-45449110383	Organic soil amendments are increasingly being examined for their potential use in preventing soil losses. The influence of two organic wastes (cotton gin crushed compost, CC, and poultry manure, PM)...	NA	Modelling Pedogenesis	NA	Crushed cotton gin compost | Poultry manure | Soil erosion | Runoff water quality	NA	poultry_manure
269	1-s2.0-S0016706108000955	TRUE	DOI:10.1016/j.geoderma.2008.03.020	https://api.elsevier.com/content/article/pii/S0016706108000955	Influence of two organic amendments on the soil physical properties, soil losses, sediments and runoff water quality	M., Tejada	Abstract Organic soil amendments are increasingly being examined for their potential use in preventing soil losses. The influence of two organic wastes (cotton gin crushed compost, CC, and poultry manure, PM) applied during a period of four years on a Xerollic Calciorthid under dryland conditions near to Seville (Guadalquivir Valley, Andalusia, Spain) on soil physical properties (structural insta…	Geoderma	NA	167061	145	3	2008-06-15	2008-06-15	325	334	10.1016/j.geoderma.2008.03.020	0	FALSE	FALSE	NA	Journal	Copyright Ã‚Â© 2008 Elsevier B.V. All rights reserved.	S0016-7061(08)00095-5	45449110383	2-s2.0-45449110383	Organic soil amendments are increasingly being examined for their potential use in preventing soil losses. The influence of two organic wastes (cotton gin crushed compost, CC, and poultry manure, PM)...	NA	Modelling Pedogenesis	NA	Crushed cotton gin compost | Poultry manure | Soil erosion | Runoff water quality	NA	compost
270	1-s2.0-S0016706110003988	TRUE	DOI:10.1016/j.geoderma.2010.12.019	https://api.elsevier.com/content/article/pii/S0016706110003988	Phosphorus leaching in a sandy soil as affected by organic and inorganic fertilizer sources	Jihoon, Kang	Abstract Long-term application of phosphorus (P) to soils as fertilizer or manure can increase the potential for P loss to ground and surface waters. Vertical P transport was investigated in a sandy soil material receiving seven different P fertilizer sources: poultry compost, poultry litter, triple superphosphate [Ca(H2PO4)2Ã‚Â·H2O], dairy lagoon liquid, swine lagoon liquid, swine lagoon sludge,…	Geoderma	NA	167061	161	3	2011-03-15	2011-03-15	194	201	10.1016/j.geoderma.2010.12.019	0	FALSE	FALSE	NA	Journal	Copyright Ã‚Â© 2011 Elsevier B.V. Published by Elsevier B.V. All rights reserved.	S0016-7061(10)00398-8	79951581004	2-s2.0-79951581004	Long-term application of phosphorus (P) to soils as fertilizer or manure can increase the potential for P loss to ground and surface waters. Vertical P transport was investigated in a sandy soil material...	NA	NA	NA	Adsorption | Leaching | Organic carbon | Phosphorus | Water quality	NA	poultry_manure
271	1-s2.0-S0016706110003988	TRUE	DOI:10.1016/j.geoderma.2010.12.019	https://api.elsevier.com/content/article/pii/S0016706110003988	Phosphorus leaching in a sandy soil as affected by organic and inorganic fertilizer sources	Jihoon, Kang	Abstract Long-term application of phosphorus (P) to soils as fertilizer or manure can increase the potential for P loss to ground and surface waters. Vertical P transport was investigated in a sandy soil material receiving seven different P fertilizer sources: poultry compost, poultry litter, triple superphosphate [Ca(H2PO4)2Ã‚Â·H2O], dairy lagoon liquid, swine lagoon liquid, swine lagoon sludge,…	Geoderma	NA	167061	161	3	2011-03-15	2011-03-15	194	201	10.1016/j.geoderma.2010.12.019	0	FALSE	FALSE	NA	Journal	Copyright Ã‚Â© 2011 Elsevier B.V. Published by Elsevier B.V. All rights reserved.	S0016-7061(10)00398-8	79951581004	2-s2.0-79951581004	Long-term application of phosphorus (P) to soils as fertilizer or manure can increase the potential for P loss to ground and surface waters. Vertical P transport was investigated in a sandy soil material...	NA	NA	NA	Adsorption | Leaching | Organic carbon | Phosphorus | Water quality	NA	fertilizer
272	1-s2.0-S0016706112004053	TRUE	DOI:10.1016/j.geoderma.2012.11.010	https://api.elsevier.com/content/article/pii/S0016706112004053	Nutrient release from composts into the surrounding soil	Tra T.T., Duong	Abstract Improved understanding of the effect of compost application on soil properties is critical for optimizing the desired effects of compost application. However there are no studies on the effect of composts on soil properties within the first centimetres of the compost layer. In this microcosm study three composts from different feedstocks, namely C1 (from animal manures) and C2 and C3 (fr…	Geoderma	NA	167061	195Ã¢â‚¬â€œ196	NA	2013-03-01	2013-03-01	42	47	10.1016/j.geoderma.2012.11.010	0	FALSE	FALSE	NA	Journal	Copyright Ã‚Â© 2012 Elsevier B.V. All rights reserved.	S0016-7061(12)00405-3	84871487503	2-s2.0-84871487503	Improved understanding of the effect of compost application on soil properties is critical for optimizing the desired effects of compost application. However there are no studies on the effect of composts...	NA	NA	NA	Microbial C | Microbial respiration | Nutrient release | Nutrient movement | Soil layer	NA	compost
273	1-s2.0-S0016706112004053	TRUE	DOI:10.1016/j.geoderma.2012.11.010	https://api.elsevier.com/content/article/pii/S0016706112004053	Nutrient release from composts into the surrounding soil	Tra T.T., Duong	Abstract Improved understanding of the effect of compost application on soil properties is critical for optimizing the desired effects of compost application. However there are no studies on the effect of composts on soil properties within the first centimetres of the compost layer. In this microcosm study three composts from different feedstocks, namely C1 (from animal manures) and C2 and C3 (fr…	Geoderma	NA	167061	195Ã¢â‚¬â€œ196	NA	2013-03-01	2013-03-01	42	47	10.1016/j.geoderma.2012.11.010	0	FALSE	FALSE	NA	Journal	Copyright Ã‚Â© 2012 Elsevier B.V. All rights reserved.	S0016-7061(12)00405-3	84871487503	2-s2.0-84871487503	Improved understanding of the effect of compost application on soil properties is critical for optimizing the desired effects of compost application. However there are no studies on the effect of composts...	NA	NA	NA	Microbial C | Microbial respiration | Nutrient release | Nutrient movement | Soil layer	NA	organic_housewaste
274	1-s2.0-S0016706113001432	TRUE	DOI:10.1016/j.geoderma.2013.04.025	https://api.elsevier.com/content/article/pii/S0016706113001432	Seasonal changes in microbial activity in a semiarid soil after application of a high dose of different organic amendments	Ignacio, Jorge-Mardomingo	Abstract The application of organic wastes as amendments to improve soil properties has become a very common practice, especially under Mediterranean semiarid conditions. We investigated changes in soil microbial activity under field conditions over a one-year period after the application of a single high dose (160MghaÃ¢Ë†â€™1 dry mass) of three organic amendments subjected to different stabiliza…	Geoderma	NA	167061	206	NA	2013-09-01	2013-09-01	40	48	10.1016/j.geoderma.2013.04.025	0	FALSE	FALSE	NA	Journal	Copyright Ã‚Â© 2013 Elsevier B.V. All rights reserved.	S0016-7061(13)00143-2	84878592306	2-s2.0-84878592306	The application of organic wastes as amendments to improve soil properties has become a very common practice, especially under Mediterranean semiarid conditions. We investigated changes in soil microbial...	NA	NA	NA	MSW compost | Sewage sludge | Soil microbial biomass | Soil respiration | Soil enzyme activity	NA	polyhydroxy_alkanoate_(pha)
275	1-s2.0-S0016706113001432	TRUE	DOI:10.1016/j.geoderma.2013.04.025	https://api.elsevier.com/content/article/pii/S0016706113001432	Seasonal changes in microbial activity in a semiarid soil after application of a high dose of different organic amendments	Ignacio, Jorge-Mardomingo	Abstract The application of organic wastes as amendments to improve soil properties has become a very common practice, especially under Mediterranean semiarid conditions. We investigated changes in soil microbial activity under field conditions over a one-year period after the application of a single high dose (160MghaÃ¢Ë†â€™1 dry mass) of three organic amendments subjected to different stabiliza…	Geoderma	NA	167061	206	NA	2013-09-01	2013-09-01	40	48	10.1016/j.geoderma.2013.04.025	0	FALSE	FALSE	NA	Journal	Copyright Ã‚Â© 2013 Elsevier B.V. All rights reserved.	S0016-7061(13)00143-2	84878592306	2-s2.0-84878592306	The application of organic wastes as amendments to improve soil properties has become a very common practice, especially under Mediterranean semiarid conditions. We investigated changes in soil microbial...	NA	NA	NA	MSW compost | Sewage sludge | Soil microbial biomass | Soil respiration | Soil enzyme activity	NA	compost
276	1-s2.0-S0016706113001432	TRUE	DOI:10.1016/j.geoderma.2013.04.025	https://api.elsevier.com/content/article/pii/S0016706113001432	Seasonal changes in microbial activity in a semiarid soil after application of a high dose of different organic amendments	Ignacio, Jorge-Mardomingo	Abstract The application of organic wastes as amendments to improve soil properties has become a very common practice, especially under Mediterranean semiarid conditions. We investigated changes in soil microbial activity under field conditions over a one-year period after the application of a single high dose (160MghaÃ¢Ë†â€™1 dry mass) of three organic amendments subjected to different stabiliza…	Geoderma	NA	167061	206	NA	2013-09-01	2013-09-01	40	48	10.1016/j.geoderma.2013.04.025	0	FALSE	FALSE	NA	Journal	Copyright Ã‚Â© 2013 Elsevier B.V. All rights reserved.	S0016-7061(13)00143-2	84878592306	2-s2.0-84878592306	The application of organic wastes as amendments to improve soil properties has become a very common practice, especially under Mediterranean semiarid conditions. We investigated changes in soil microbial...	NA	NA	NA	MSW compost | Sewage sludge | Soil microbial biomass | Soil respiration | Soil enzyme activity	NA	organic_housewaste
277	1-s2.0-S001670611500021X	TRUE	DOI:10.1016/j.geoderma.2015.01.014	https://api.elsevier.com/content/article/pii/S001670611500021X	Long-term addition of organic fertilizers has little effect on soil organic phosphorus as characterized by 31P NMR spectroscopy and enzyme additions	K.E., Annaheim	Abstract Organic fertilizers are important in agroecosystems, but the fate of specific forms of added phosphorus (P) in the long-term is not well understood. We studied the effects of 62years of application of three organic fertilizers (dairy manure, compost and dried sewage sludge) on organic P forms in the topsoil as characterized by solution 31P NMR spectroscopy and enzyme additions in a field…	Geoderma	NA	167061	257Ã¢â‚¬â€œ258	NA	2015-11-01	2015-11-01	67	77	10.1016/j.geoderma.2015.01.014	0	FALSE	FALSE	NA	Journal	Copyright Ã‚Â© 2015 Elsevier B.V. All rights reserved.	S0016-7061(15)00021-X	84937568329	2-s2.0-84937568329	Organic fertilizers are important in agroecosystems, but the fate of specific forms of added phosphorus (P) in the long-term is not well understood. We studied the effects of 62years of application...	NA	Special issue on developments in soil organic phosphorus cycling in natural and agricultural ecosystems	NA	Soil organic phosphorus | Organic fertilizer | Long-term field experiment | 31P nuclear magnetic resonance spectroscopy | Enzyme additions	NA	compost
278	1-s2.0-S001670611500021X	TRUE	DOI:10.1016/j.geoderma.2015.01.014	https://api.elsevier.com/content/article/pii/S001670611500021X	Long-term addition of organic fertilizers has little effect on soil organic phosphorus as characterized by 31P NMR spectroscopy and enzyme additions	K.E., Annaheim	Abstract Organic fertilizers are important in agroecosystems, but the fate of specific forms of added phosphorus (P) in the long-term is not well understood. We studied the effects of 62years of application of three organic fertilizers (dairy manure, compost and dried sewage sludge) on organic P forms in the topsoil as characterized by solution 31P NMR spectroscopy and enzyme additions in a field…	Geoderma	NA	167061	257Ã¢â‚¬â€œ258	NA	2015-11-01	2015-11-01	67	77	10.1016/j.geoderma.2015.01.014	0	FALSE	FALSE	NA	Journal	Copyright Ã‚Â© 2015 Elsevier B.V. All rights reserved.	S0016-7061(15)00021-X	84937568329	2-s2.0-84937568329	Organic fertilizers are important in agroecosystems, but the fate of specific forms of added phosphorus (P) in the long-term is not well understood. We studied the effects of 62years of application...	NA	Special issue on developments in soil organic phosphorus cycling in natural and agricultural ecosystems	NA	Soil organic phosphorus | Organic fertilizer | Long-term field experiment | 31P nuclear magnetic resonance spectroscopy | Enzyme additions	NA	cattle_manure
279	1-s2.0-S0016706115001780	TRUE	DOI:10.1016/j.geoderma.2015.06.006	https://api.elsevier.com/content/article/pii/S0016706115001780	Engineering soil organic matter quality: Biodiesel Co-Product (BCP) stimulates exudation of nitrogenous microbial biopolymers	Marc A., Redmile-Gordon	Abstract Biodiesel Co-Product (BCP) is a complex organic material formed during the transesterification of lipids. We investigated the effect of BCP on the extracellular microbial matrix or Ã¢â‚¬Ëœextracellular polymeric substanceÃ¢â‚¬â„¢ (EPS) in soil which is suspected to be a highly influential fraction of soil organic matter (SOM). It was hypothesised that more N would be transferred to EPS i…	Geoderma	NA	167061	259Ã¢â‚¬â€œ260	NA	2015-12-01	2015-12-01	205	212	10.1016/j.geoderma.2015.06.006	1	TRUE	FALSE	http://creativecommons.org/licenses/by/4.0/	Journal	Copyright Ã‚Â© 2015 The Authors. Published by Elsevier B.V.	S0016-7061(15)00178-0	84935031947	2-s2.0-84935031947	Biodiesel Co-Product (BCP) is a complex organic material formed during the transesterification of lipids. We investigated the effect of BCP on the extracellular microbial matrix or Ã¢â‚¬Ëœextracellular polymeric...	NA	NA	NA	Extracellular polymeric substances | EPS matrix | Exocellular amino acids | Exopolysaccharide | Exopeptide | Protein dynamics | Nitrate | Glycerol	NA	glutamic_acid
280	1-s2.0-S0016706115001780	TRUE	DOI:10.1016/j.geoderma.2015.06.006	https://api.elsevier.com/content/article/pii/S0016706115001780	Engineering soil organic matter quality: Biodiesel Co-Product (BCP) stimulates exudation of nitrogenous microbial biopolymers	Marc A., Redmile-Gordon	Abstract Biodiesel Co-Product (BCP) is a complex organic material formed during the transesterification of lipids. We investigated the effect of BCP on the extracellular microbial matrix or Ã¢â‚¬Ëœextracellular polymeric substanceÃ¢â‚¬â„¢ (EPS) in soil which is suspected to be a highly influential fraction of soil organic matter (SOM). It was hypothesised that more N would be transferred to EPS i…	Geoderma	NA	167061	259Ã¢â‚¬â€œ260	NA	2015-12-01	2015-12-01	205	212	10.1016/j.geoderma.2015.06.006	1	TRUE	FALSE	http://creativecommons.org/licenses/by/4.0/	Journal	Copyright Ã‚Â© 2015 The Authors. Published by Elsevier B.V.	S0016-7061(15)00178-0	84935031947	2-s2.0-84935031947	Biodiesel Co-Product (BCP) is a complex organic material formed during the transesterification of lipids. We investigated the effect of BCP on the extracellular microbial matrix or Ã¢â‚¬Ëœextracellular polymeric...	NA	NA	NA	Extracellular polymeric substances | EPS matrix | Exocellular amino acids | Exopolysaccharide | Exopeptide | Protein dynamics | Nitrate | Glycerol	NA	glycerol
281	1-s2.0-S0016706115001780	TRUE	DOI:10.1016/j.geoderma.2015.06.006	https://api.elsevier.com/content/article/pii/S0016706115001780	Engineering soil organic matter quality: Biodiesel Co-Product (BCP) stimulates exudation of nitrogenous microbial biopolymers	Marc A., Redmile-Gordon	Abstract Biodiesel Co-Product (BCP) is a complex organic material formed during the transesterification of lipids. We investigated the effect of BCP on the extracellular microbial matrix or Ã¢â‚¬Ëœextracellular polymeric substanceÃ¢â‚¬â„¢ (EPS) in soil which is suspected to be a highly influential fraction of soil organic matter (SOM). It was hypothesised that more N would be transferred to EPS i…	Geoderma	NA	167061	259Ã¢â‚¬â€œ260	NA	2015-12-01	2015-12-01	205	212	10.1016/j.geoderma.2015.06.006	1	TRUE	FALSE	http://creativecommons.org/licenses/by/4.0/	Journal	Copyright Ã‚Â© 2015 The Authors. Published by Elsevier B.V.	S0016-7061(15)00178-0	84935031947	2-s2.0-84935031947	Biodiesel Co-Product (BCP) is a complex organic material formed during the transesterification of lipids. We investigated the effect of BCP on the extracellular microbial matrix or Ã¢â‚¬Ëœextracellular polymeric...	NA	NA	NA	Extracellular polymeric substances | EPS matrix | Exocellular amino acids | Exopolysaccharide | Exopeptide | Protein dynamics | Nitrate | Glycerol	NA	glutamine
282	1-s2.0-S0016706115301476	TRUE	DOI:10.1016/j.geoderma.2015.11.032	https://api.elsevier.com/content/article/pii/S0016706115301476	The impact of organic amendments on soil hydrology, structure and microbial respiration in semiarid lands	Najme, Yazdanpanah	Abstract Few studies have considered the effect of organic amendments on soil microbial activity and its contributions to hydraulic conductivity under field conditions in semiarid region soils with different textures and degrees of aggregate stability. This study was performed to investigate the relationship between selected soil properties and hydraulic conductivity in response to different type…	Geoderma	NA	167061	266	NA	2016-03-15	2016-03-15	58	65	10.1016/j.geoderma.2015.11.032	0	FALSE	FALSE	NA	Journal	Copyright Ã‚Â© 2015 Elsevier B.V. All rights reserved.	S0016-7061(15)30147-6	84951155074	2-s2.0-84951155074	Few studies have considered the effect of organic amendments on soil microbial activity and its contributions to hydraulic conductivity under field conditions in semiarid region soils with different...	NA	NA	NA	Hydraulic conductivity | Microbial respiration | Organic amendments | Semiarid regions	NA	organic_housewaste
283	1-s2.0-S0016706115301476	TRUE	DOI:10.1016/j.geoderma.2015.11.032	https://api.elsevier.com/content/article/pii/S0016706115301476	The impact of organic amendments on soil hydrology, structure and microbial respiration in semiarid lands	Najme, Yazdanpanah	Abstract Few studies have considered the effect of organic amendments on soil microbial activity and its contributions to hydraulic conductivity under field conditions in semiarid region soils with different textures and degrees of aggregate stability. This study was performed to investigate the relationship between selected soil properties and hydraulic conductivity in response to different type…	Geoderma	NA	167061	266	NA	2016-03-15	2016-03-15	58	65	10.1016/j.geoderma.2015.11.032	0	FALSE	FALSE	NA	Journal	Copyright Ã‚Â© 2015 Elsevier B.V. All rights reserved.	S0016-7061(15)30147-6	84951155074	2-s2.0-84951155074	Few studies have considered the effect of organic amendments on soil microbial activity and its contributions to hydraulic conductivity under field conditions in semiarid region soils with different...	NA	NA	NA	Hydraulic conductivity | Microbial respiration | Organic amendments | Semiarid regions	NA	compost
284	1-s2.0-S0016706116301057	TRUE	DOI:10.1016/j.geoderma.2016.03.007	https://api.elsevier.com/content/article/pii/S0016706116301057	Microbial growth and community structure in acid mine soils after addition of different amendments for soil reclamation	R., Zornoza	Abstract The extreme soil conditions in metalliferous mine soils have a negative influence on soil biological activity. Therefore, amendments are often used to improve soil quality and activate microbial communities. In order to elucidate some of the factors controlling microbial growth and community structure after application of amendments in acid mine soils, we performed an incubation experime…	Geoderma	NA	167061	272	NA	2016-06-15	2016-06-15	64	72	10.1016/j.geoderma.2016.03.007	0	FALSE	FALSE	NA	Journal	Copyright Ã‚Â© 2016 Elsevier B.V. All rights reserved.	S0016-7061(16)30105-7	84960849916	2-s2.0-84960849916	The extreme soil conditions in metalliferous mine soils have a negative influence on soil biological activity. Therefore, amendments are often used to improve soil quality and activate microbial communities....	NA	NA	NA	Phospholipid fatty acids | pH | Soil reclamation | Bacterial growth | Fungal growth | Pyrogenic carbonaceous material	NA	pig_manure
285	1-s2.0-S0016706116301057	TRUE	DOI:10.1016/j.geoderma.2016.03.007	https://api.elsevier.com/content/article/pii/S0016706116301057	Microbial growth and community structure in acid mine soils after addition of different amendments for soil reclamation	R., Zornoza	Abstract The extreme soil conditions in metalliferous mine soils have a negative influence on soil biological activity. Therefore, amendments are often used to improve soil quality and activate microbial communities. In order to elucidate some of the factors controlling microbial growth and community structure after application of amendments in acid mine soils, we performed an incubation experime…	Geoderma	NA	167061	272	NA	2016-06-15	2016-06-15	64	72	10.1016/j.geoderma.2016.03.007	0	FALSE	FALSE	NA	Journal	Copyright Ã‚Â© 2016 Elsevier B.V. All rights reserved.	S0016-7061(16)30105-7	84960849916	2-s2.0-84960849916	The extreme soil conditions in metalliferous mine soils have a negative influence on soil biological activity. Therefore, amendments are often used to improve soil quality and activate microbial communities....	NA	NA	NA	Phospholipid fatty acids | pH | Soil reclamation | Bacterial growth | Fungal growth | Pyrogenic carbonaceous material	NA	polystyrene_(ps)
286	1-s2.0-S0016706116306516	TRUE	DOI:10.1016/j.geoderma.2017.08.002	https://api.elsevier.com/content/article/pii/S0016706116306516	Digested bioenergy byproduct with low concentration of nutrients increased greenhouse gas emissions from soil	Lucas Pecci, Canisares	Abstract This research measured greenhouse gas emissions (GHG) from well-drained soil after using two forms of vinasse (in natura and digested) as fertilizer and the interaction of both with urea. Although carbon (C) and nitrogen (N) content in digested vinasse was two times less than in the normal vinasse (part of the N was lost during filtration and used by cellular synthesis of reactor biomass…	Geoderma	NA	167061	307	NA	2017-12-01	2017-12-01	81	90	10.1016/j.geoderma.2017.08.002	0	FALSE	FALSE	NA	Journal	Ã‚Â© 2017 Elsevier B.V. All rights reserved.	S0016-7061(16)30651-6	85026770273	2-s2.0-85026770273	This research measured greenhouse gas emissions (GHG) from well-drained soil after using two forms of vinasse (in natura and digested) as fertilizer and the interaction of both with urea. Although carbon...	NA	NA	NA	Vinasse | Anaerobic digestion | Organic fertilizers	NA	fertilizer
287	1-s2.0-S0016706116306516	TRUE	DOI:10.1016/j.geoderma.2017.08.002	https://api.elsevier.com/content/article/pii/S0016706116306516	Digested bioenergy byproduct with low concentration of nutrients increased greenhouse gas emissions from soil	Lucas Pecci, Canisares	Abstract This research measured greenhouse gas emissions (GHG) from well-drained soil after using two forms of vinasse (in natura and digested) as fertilizer and the interaction of both with urea. Although carbon (C) and nitrogen (N) content in digested vinasse was two times less than in the normal vinasse (part of the N was lost during filtration and used by cellular synthesis of reactor biomass…	Geoderma	NA	167061	307	NA	2017-12-01	2017-12-01	81	90	10.1016/j.geoderma.2017.08.002	0	FALSE	FALSE	NA	Journal	Ã‚Â© 2017 Elsevier B.V. All rights reserved.	S0016-7061(16)30651-6	85026770273	2-s2.0-85026770273	This research measured greenhouse gas emissions (GHG) from well-drained soil after using two forms of vinasse (in natura and digested) as fertilizer and the interaction of both with urea. Although carbon...	NA	NA	NA	Vinasse | Anaerobic digestion | Organic fertilizers	NA	vinasses
288	1-s2.0-S0016706117303154	TRUE	DOI:10.1016/j.geoderma.2017.11.034	https://api.elsevier.com/content/article/pii/S0016706117303154	Effects of co-composted maize, sewage sludge, and biochar mixtures on hydrological and physical qualities of sandy soil	Tomasz, GÃ…â€šÃ„â€¦b	Abstract The agronomic utilization of compost has some benefits to soil. Compost increase soil nutrients, and soil organic matter content; thus, it has a positive effect on biological, physical, and chemical properties of the soil. During the composting process, different feedstocks such as plant wastes, sewage sludge, and biochar are used. Biochar has great potential to improve the quality of co…	Geoderma	NA	167061	315	NA	2018-04-01	2018-04-01	27	35	10.1016/j.geoderma.2017.11.034	0	FALSE	FALSE	NA	Journal	Ã‚Â© 2017 Elsevier B.V. All rights reserved.	S0016-7061(17)30315-4	85037535299	2-s2.0-85037535299	The agronomic utilization of compost has some benefits to soil. Compost increase soil nutrients, and soil organic matter content; thus, it has a positive effect on biological, physical, and chemical...	NA	NA	NA	Compost | Sewage sludge | Biochar | Sandy soil | Soil quality | Soil water retention	NA	maize_stover
289	1-s2.0-S0016706117303154	TRUE	DOI:10.1016/j.geoderma.2017.11.034	https://api.elsevier.com/content/article/pii/S0016706117303154	Effects of co-composted maize, sewage sludge, and biochar mixtures on hydrological and physical qualities of sandy soil	Tomasz, GÃ…â€šÃ„â€¦b	Abstract The agronomic utilization of compost has some benefits to soil. Compost increase soil nutrients, and soil organic matter content; thus, it has a positive effect on biological, physical, and chemical properties of the soil. During the composting process, different feedstocks such as plant wastes, sewage sludge, and biochar are used. Biochar has great potential to improve the quality of co…	Geoderma	NA	167061	315	NA	2018-04-01	2018-04-01	27	35	10.1016/j.geoderma.2017.11.034	0	FALSE	FALSE	NA	Journal	Ã‚Â© 2017 Elsevier B.V. All rights reserved.	S0016-7061(17)30315-4	85037535299	2-s2.0-85037535299	The agronomic utilization of compost has some benefits to soil. Compost increase soil nutrients, and soil organic matter content; thus, it has a positive effect on biological, physical, and chemical...	NA	NA	NA	Compost | Sewage sludge | Biochar | Sandy soil | Soil quality | Soil water retention	NA	compost
290	1-s2.0-S0016706117311941	TRUE	DOI:10.1016/j.geoderma.2017.10.040	https://api.elsevier.com/content/article/pii/S0016706117311941	Mutual effect of Phragmites australis, Arundo donax and immobilization agents on arsenic and trace metals phytostabilization in polluted soils	Paola, Castaldi	Abstract This study assessed the suitability of Phragmites australis and Arundo donax for the aided phytostabilization of metal(loid)s in polluted soils treated with an iron-rich water treatment residue (Fe-WTR), a municipal solid waste compost (MSW-C) and their combination (Fe-WTR+MSW-C). The three soils under study (S1, S2, S3) showed very high total concentrations of As (from 371 to 22,661mgÃ‚…	Geoderma	NA	167061	314	NA	2018-03-15	2018-03-15	63	72	10.1016/j.geoderma.2017.10.040	0	FALSE	FALSE	NA	Journal	Ã‚Â© 2017 Elsevier B.V. All rights reserved.	S0016-7061(17)31194-1	85033561062	2-s2.0-85033561062	This study assessed the suitability of Phragmites australis and Arundo donax for the aided phytostabilization of metal(loid)s in polluted soils treated with an iron-rich water treatment residue (Fe-WTR),...	NA	NA	NA	Helophytes | Metal(loid)s | Bioaccumulation factor | Translocation factor | Municipal solid waste compost | Iron-rich water treatment residues	NA	compost
291	1-s2.0-S0016706117311941	TRUE	DOI:10.1016/j.geoderma.2017.10.040	https://api.elsevier.com/content/article/pii/S0016706117311941	Mutual effect of Phragmites australis, Arundo donax and immobilization agents on arsenic and trace metals phytostabilization in polluted soils	Paola, Castaldi	Abstract This study assessed the suitability of Phragmites australis and Arundo donax for the aided phytostabilization of metal(loid)s in polluted soils treated with an iron-rich water treatment residue (Fe-WTR), a municipal solid waste compost (MSW-C) and their combination (Fe-WTR+MSW-C). The three soils under study (S1, S2, S3) showed very high total concentrations of As (from 371 to 22,661mgÃ‚…	Geoderma	NA	167061	314	NA	2018-03-15	2018-03-15	63	72	10.1016/j.geoderma.2017.10.040	0	FALSE	FALSE	NA	Journal	Ã‚Â© 2017 Elsevier B.V. All rights reserved.	S0016-7061(17)31194-1	85033561062	2-s2.0-85033561062	This study assessed the suitability of Phragmites australis and Arundo donax for the aided phytostabilization of metal(loid)s in polluted soils treated with an iron-rich water treatment residue (Fe-WTR),...	NA	NA	NA	Helophytes | Metal(loid)s | Bioaccumulation factor | Translocation factor | Municipal solid waste compost | Iron-rich water treatment residues	NA	organic_housewaste
292	1-s2.0-S0016706117312181	TRUE	DOI:10.1016/j.geoderma.2017.07.033	https://api.elsevier.com/content/article/pii/S0016706117312181	Composition variability of spent mushroom substrates during continuous cultivation, composting process and their effects on mineral nitrogen transformation in soil	Zimo, Lou	Abstract Spent mushroom substrates (SMSs) are a typical by-product of mushroom production, which is rich in nutrient like nitrogen. The reuse of SMSs as soil amendments has become the focus of attention. Due to its nutrient content, SMSs could contribute to reduce the use of non-renewable resources, such as peat. Recently, a SMSs recycling strategy was adopted in an edible mushroom industry Ltd.,…	Geoderma	NA	167061	307	NA	2017-12-01	2017-12-01	30	37	10.1016/j.geoderma.2017.07.033	0	FALSE	FALSE	NA	Journal	Ã‚Â© 2017 Elsevier B.V. All rights reserved.	S0016-7061(17)31218-1	85026508046	2-s2.0-85026508046	Spent mushroom substrates (SMSs) are a typical by-product of mushroom production, which is rich in nutrient like nitrogen. The reuse of SMSs as soil amendments has become the focus of attention. Due...	NA	NA	NA	Spent mushroom substrates | Compositional analysis | Soil amendment | Mineral nitrogen	NA	champost
293	1-s2.0-S0016706117312181	TRUE	DOI:10.1016/j.geoderma.2017.07.033	https://api.elsevier.com/content/article/pii/S0016706117312181	Composition variability of spent mushroom substrates during continuous cultivation, composting process and their effects on mineral nitrogen transformation in soil	Zimo, Lou	Abstract Spent mushroom substrates (SMSs) are a typical by-product of mushroom production, which is rich in nutrient like nitrogen. The reuse of SMSs as soil amendments has become the focus of attention. Due to its nutrient content, SMSs could contribute to reduce the use of non-renewable resources, such as peat. Recently, a SMSs recycling strategy was adopted in an edible mushroom industry Ltd.,…	Geoderma	NA	167061	307	NA	2017-12-01	2017-12-01	30	37	10.1016/j.geoderma.2017.07.033	0	FALSE	FALSE	NA	Journal	Ã‚Â© 2017 Elsevier B.V. All rights reserved.	S0016-7061(17)31218-1	85026508046	2-s2.0-85026508046	Spent mushroom substrates (SMSs) are a typical by-product of mushroom production, which is rich in nutrient like nitrogen. The reuse of SMSs as soil amendments has become the focus of attention. Due...	NA	NA	NA	Spent mushroom substrates | Compositional analysis | Soil amendment | Mineral nitrogen	NA	compost
294	1-s2.0-S0020169315001991	TRUE	DOI:10.1016/j.ica.2015.04.011	https://api.elsevier.com/content/article/pii/S0020169315001991	Metal-containing TUD-1 mesoporous silicates as versatile solid acid catalysts for the conversion of bio-based compounds into valuable chemicals	Li, Li	Abstract Three-dimensional mesoporous silicates of the TUD-1 family were synthesised with different metals (Zr, Hf and Sn) incorporated in the framework of the material. The mesoporosity of the prepared TUD-1s was confirmed by X-ray diffraction (XRD), nitrogen physisorption and TEM. The incorporation of the metals in the silicate structure was investigated by FT-IR and UVÃ¢â‚¬â€œVis spectroscopy.…	Inorganica Chimica Acta	NA	201693	431	NA	2015-05-24	2015-05-24	289	296	10.1016/j.ica.2015.04.011	0	FALSE	FALSE	NA	Journal	Copyright Ã‚Â© 2015 Elsevier B.V. All rights reserved.	S0020-1693(15)00199-1	NA	NA	Three-dimensional mesoporous silicates of the TUD-1 family were synthesised with different metals (Zr, Hf and Sn) incorporated in the framework of the material. The mesoporosity of the prepared TUD-1s...	NA	Advances in Transition Metal Catalysis	NA	TUD-1 | Metal-containing mesoporous silicates | Heterogeneous catalysis | Bio-based feedstock	NA	dihydroxyacetone
295	1-s2.0-S0020169315001991	TRUE	DOI:10.1016/j.ica.2015.04.011	https://api.elsevier.com/content/article/pii/S0020169315001991	Metal-containing TUD-1 mesoporous silicates as versatile solid acid catalysts for the conversion of bio-based compounds into valuable chemicals	Li, Li	Abstract Three-dimensional mesoporous silicates of the TUD-1 family were synthesised with different metals (Zr, Hf and Sn) incorporated in the framework of the material. The mesoporosity of the prepared TUD-1s was confirmed by X-ray diffraction (XRD), nitrogen physisorption and TEM. The incorporation of the metals in the silicate structure was investigated by FT-IR and UVÃ¢â‚¬â€œVis spectroscopy.…	Inorganica Chimica Acta	NA	201693	431	NA	2015-05-24	2015-05-24	289	296	10.1016/j.ica.2015.04.011	0	FALSE	FALSE	NA	Journal	Copyright Ã‚Â© 2015 Elsevier B.V. All rights reserved.	S0020-1693(15)00199-1	NA	NA	Three-dimensional mesoporous silicates of the TUD-1 family were synthesised with different metals (Zr, Hf and Sn) incorporated in the framework of the material. The mesoporosity of the prepared TUD-1s...	NA	Advances in Transition Metal Catalysis	NA	TUD-1 | Metal-containing mesoporous silicates | Heterogeneous catalysis | Bio-based feedstock	NA	solketal
296	1-s2.0-S0020169315001991	TRUE	DOI:10.1016/j.ica.2015.04.011	https://api.elsevier.com/content/article/pii/S0020169315001991	Metal-containing TUD-1 mesoporous silicates as versatile solid acid catalysts for the conversion of bio-based compounds into valuable chemicals	Li, Li	Abstract Three-dimensional mesoporous silicates of the TUD-1 family were synthesised with different metals (Zr, Hf and Sn) incorporated in the framework of the material. The mesoporosity of the prepared TUD-1s was confirmed by X-ray diffraction (XRD), nitrogen physisorption and TEM. The incorporation of the metals in the silicate structure was investigated by FT-IR and UVÃ¢â‚¬â€œVis spectroscopy.…	Inorganica Chimica Acta	NA	201693	431	NA	2015-05-24	2015-05-24	289	296	10.1016/j.ica.2015.04.011	0	FALSE	FALSE	NA	Journal	Copyright Ã‚Â© 2015 Elsevier B.V. All rights reserved.	S0020-1693(15)00199-1	NA	NA	Three-dimensional mesoporous silicates of the TUD-1 family were synthesised with different metals (Zr, Hf and Sn) incorporated in the framework of the material. The mesoporosity of the prepared TUD-1s...	NA	Advances in Transition Metal Catalysis	NA	TUD-1 | Metal-containing mesoporous silicates | Heterogeneous catalysis | Bio-based feedstock	NA	acetone
297	1-s2.0-S0020169315001991	TRUE	DOI:10.1016/j.ica.2015.04.011	https://api.elsevier.com/content/article/pii/S0020169315001991	Metal-containing TUD-1 mesoporous silicates as versatile solid acid catalysts for the conversion of bio-based compounds into valuable chemicals	Li, Li	Abstract Three-dimensional mesoporous silicates of the TUD-1 family were synthesised with different metals (Zr, Hf and Sn) incorporated in the framework of the material. The mesoporosity of the prepared TUD-1s was confirmed by X-ray diffraction (XRD), nitrogen physisorption and TEM. The incorporation of the metals in the silicate structure was investigated by FT-IR and UVÃ¢â‚¬â€œVis spectroscopy.…	Inorganica Chimica Acta	NA	201693	431	NA	2015-05-24	2015-05-24	289	296	10.1016/j.ica.2015.04.011	0	FALSE	FALSE	NA	Journal	Copyright Ã‚Â© 2015 Elsevier B.V. All rights reserved.	S0020-1693(15)00199-1	NA	NA	Three-dimensional mesoporous silicates of the TUD-1 family were synthesised with different metals (Zr, Hf and Sn) incorporated in the framework of the material. The mesoporosity of the prepared TUD-1s...	NA	Advances in Transition Metal Catalysis	NA	TUD-1 | Metal-containing mesoporous silicates | Heterogeneous catalysis | Bio-based feedstock	NA	glycerol
298	1-s2.0-S0020169315001991	TRUE	DOI:10.1016/j.ica.2015.04.011	https://api.elsevier.com/content/article/pii/S0020169315001991	Metal-containing TUD-1 mesoporous silicates as versatile solid acid catalysts for the conversion of bio-based compounds into valuable chemicals	Li, Li	Abstract Three-dimensional mesoporous silicates of the TUD-1 family were synthesised with different metals (Zr, Hf and Sn) incorporated in the framework of the material. The mesoporosity of the prepared TUD-1s was confirmed by X-ray diffraction (XRD), nitrogen physisorption and TEM. The incorporation of the metals in the silicate structure was investigated by FT-IR and UVÃ¢â‚¬â€œVis spectroscopy.…	Inorganica Chimica Acta	NA	201693	431	NA	2015-05-24	2015-05-24	289	296	10.1016/j.ica.2015.04.011	0	FALSE	FALSE	NA	Journal	Copyright Ã‚Â© 2015 Elsevier B.V. All rights reserved.	S0020-1693(15)00199-1	NA	NA	Three-dimensional mesoporous silicates of the TUD-1 family were synthesised with different metals (Zr, Hf and Sn) incorporated in the framework of the material. The mesoporosity of the prepared TUD-1s...	NA	Advances in Transition Metal Catalysis	NA	TUD-1 | Metal-containing mesoporous silicates | Heterogeneous catalysis | Bio-based feedstock	NA	vanillin
299	1-s2.0-S0021863400906620	TRUE	DOI:10.1006/jaer.2000.0662	https://api.elsevier.com/content/article/pii/S0021863400906620	SEÃ¢â‚¬â€Structures and Environment Gaseous Emissions of Carbon Dioxide, Ammonia and Nitrous Oxide from Organic Household Waste in a Compost Reactor under Different Temperature Regimes	B., Beck-Friis	Abstract Gaseous emissions and the biological turnover of organic household wastes were studied under controlled conditions in a compost reactor (55Ã‚Â°C, moisture content 65% w/w, O2concentration 16% in compost off-gas). During the first experiments, the temperature was increased to 55Ã‚Â°C within 6 h using external heating. These experiments resulted in low emissions of CO2indicating a low biol…	Journal of Agricultural Engineering Research	NA	218634	78	4	2001-04-01	2001-04-01	423	430	10.1006/jaer.2000.0662	0	FALSE	FALSE	NA	Journal	Copyright Ã‚Â© 2001 Silsoe Research Institute. Published by Elsevier Ltd. All rights reserved.	S0021-8634(00)90662-0	337721	2-s2.0-0000337721	Gaseous emissions and the biological turnover of organic household wastes were studied under controlled conditions in a compost reactor (55Ã‚Â°C, moisture content 65% w/w, O2concentration 16% in compost...	NA	NA	Regular Article	NA	NA	fatty_acids		fatty_acids
300	1-s2.0-S0021863400906620	TRUE	DOI:10.1006/jaer.2000.0662	https://api.elsevier.com/content/article/pii/S0021863400906620	SEÃ¢â‚¬â€Structures and Environment Gaseous Emissions of Carbon Dioxide, Ammonia and Nitrous Oxide from Organic Household Waste in a Compost Reactor under Different Temperature Regimes	B., Beck-Friis	Abstract Gaseous emissions and the biological turnover of organic household wastes were studied under controlled conditions in a compost reactor (55Ã‚Â°C, moisture content 65% w/w, O2concentration 16% in compost off-gas). During the first experiments, the temperature was increased to 55Ã‚Â°C within 6 h using external heating. These experiments resulted in low emissions of CO2indicating a low biol…	Journal of Agricultural Engineering Research	NA	218634	78	4	2001-04-01	2001-04-01	423	430	10.1006/jaer.2000.0662	0	FALSE	FALSE	NA	Journal	Copyright Ã‚Â© 2001 Silsoe Research Institute. Published by Elsevier Ltd. All rights reserved.	S0021-8634(00)90662-0	337721	2-s2.0-0000337721	Gaseous emissions and the biological turnover of organic household wastes were studied under controlled conditions in a compost reactor (55Ã‚Â°C, moisture content 65% w/w, O2concentration 16% in compost...	NA	NA	Regular Article	NA	NA	compost
301	1-s2.0-S0021863400906620	TRUE	DOI:10.1006/jaer.2000.0662	https://api.elsevier.com/content/article/pii/S0021863400906620	SEÃ¢â‚¬â€Structures and Environment Gaseous Emissions of Carbon Dioxide, Ammonia and Nitrous Oxide from Organic Household Waste in a Compost Reactor under Different Temperature Regimes	B., Beck-Friis	Abstract Gaseous emissions and the biological turnover of organic household wastes were studied under controlled conditions in a compost reactor (55Ã‚Â°C, moisture content 65% w/w, O2concentration 16% in compost off-gas). During the first experiments, the temperature was increased to 55Ã‚Â°C within 6 h using external heating. These experiments resulted in low emissions of CO2indicating a low biol…	Journal of Agricultural Engineering Research	NA	218634	78	4	2001-04-01	2001-04-01	423	430	10.1006/jaer.2000.0662	0	FALSE	FALSE	NA	Journal	Copyright Ã‚Â© 2001 Silsoe Research Institute. Published by Elsevier Ltd. All rights reserved.	S0021-8634(00)90662-0	337721	2-s2.0-0000337721	Gaseous emissions and the biological turnover of organic household wastes were studied under controlled conditions in a compost reactor (55Ã‚Â°C, moisture content 65% w/w, O2concentration 16% in compost...	NA	NA	Regular Article	NA	NA	organic_housewaste
302	1-s2.0-S0021951707000097	TRUE	DOI:10.1016/j.jcat.2007.01.006	https://api.elsevier.com/content/article/pii/S0021951707000097	Transesterification of triacetin using solid BrÃƒÂ¸nsted bases	Yijun, Liu	Abstract This paper reports the results of an investigation into the use of solid BrÃƒÂ¸nsted base catalysts as a potential alternative to homogeneous base catalysts in the transesterification of triacetin with small alcohols carried out under mild reaction conditions. Two catalysts with organic quaternary ammonium functionality (QN+OHÃ¢Ë†â€™), a resin (A26), and a functionalized silica gel (QN+O…	Journal of Catalysis	NA	219517	246	2	2007-03-10	2007-03-10	428	433	10.1016/j.jcat.2007.01.006	0	FALSE	FALSE	NA	Journal	Copyright Ã‚Â© 2007 Elsevier Inc. All rights reserved.	S0021-9517(07)00009-7	50249109575	2-s2.0-50249109575	This paper reports the results of an investigation into the use of solid BrÃƒÂ¸nsted base catalysts as a potential alternative to homogeneous base catalysts in the transesterification of triacetin with...	NA	NA	NA	Transesterification | Triacetin | Solid base catalyst | BrÃƒÂ¸nsted base | Quarternary ammonium hydroxide | Support effect	NA	glycerol
303	1-s2.0-S0021951707000097	TRUE	DOI:10.1016/j.jcat.2007.01.006	https://api.elsevier.com/content/article/pii/S0021951707000097	Transesterification of triacetin using solid BrÃƒÂ¸nsted bases	Yijun, Liu	Abstract This paper reports the results of an investigation into the use of solid BrÃƒÂ¸nsted base catalysts as a potential alternative to homogeneous base catalysts in the transesterification of triacetin with small alcohols carried out under mild reaction conditions. Two catalysts with organic quaternary ammonium functionality (QN+OHÃ¢Ë†â€™), a resin (A26), and a functionalized silica gel (QN+O…	Journal of Catalysis	NA	219517	246	2	2007-03-10	2007-03-10	428	433	10.1016/j.jcat.2007.01.006	0	FALSE	FALSE	NA	Journal	Copyright Ã‚Â© 2007 Elsevier Inc. All rights reserved.	S0021-9517(07)00009-7	50249109575	2-s2.0-50249109575	This paper reports the results of an investigation into the use of solid BrÃƒÂ¸nsted base catalysts as a potential alternative to homogeneous base catalysts in the transesterification of triacetin with...	NA	NA	NA	Transesterification | Triacetin | Solid base catalyst | BrÃƒÂ¸nsted base | Quarternary ammonium hydroxide | Support effect	NA	methanol
304	1-s2.0-S0021951707000371	TRUE	DOI:10.1016/j.jcat.2007.01.023	https://api.elsevier.com/content/article/pii/S0021951707000371	Processing biomass-derived oxygenates in the oil refinery: Catalytic cracking (FCC) reaction pathways and role of catalyst	Avelino, Corma	Abstract The catalytic cracking of glycerol and sorbitol, as representative of biomass-derived oxygenates, was studied at 500Ã¢â‚¬â€œ700Ã¢â‚¬â€°Ã‚Â°C with six different catalysts, including a fresh fluid catalytic cracking (FCC) catalyst (FCC1), an equilibrium FCC catalyst with metal impurities (ECat), a mesoporous Al2O3, a USY zeolite (Y), a ZSM5-based FCC additive (ZSM5), and an inert silicon c…	Journal of Catalysis	NA	219517	247	2	2007-04-25	2007-04-25	307	327	10.1016/j.jcat.2007.01.023	0	FALSE	FALSE	NA	Journal	Copyright Ã‚Â© 2007 Elsevier Inc. All rights reserved.	S0021-9517(07)00037-1	33947706728	2-s2.0-33947706728	The catalytic cracking of glycerol and sorbitol, as representative of biomass-derived oxygenates, was studied at 500Ã¢â‚¬â€œ700Ã¢â‚¬â€°Ã‚Â°C with six different catalysts, including a fresh fluid catalytic cracking (FCC)...	NA	NA	NA	Biomass | Catalytic cracking | Glycerol | Zeolites | Biofuels | Biochemicals	NA	glycerol
305	1-s2.0-S0021951707000371	TRUE	DOI:10.1016/j.jcat.2007.01.023	https://api.elsevier.com/content/article/pii/S0021951707000371	Processing biomass-derived oxygenates in the oil refinery: Catalytic cracking (FCC) reaction pathways and role of catalyst	Avelino, Corma	Abstract The catalytic cracking of glycerol and sorbitol, as representative of biomass-derived oxygenates, was studied at 500Ã¢â‚¬â€œ700Ã¢â‚¬â€°Ã‚Â°C with six different catalysts, including a fresh fluid catalytic cracking (FCC) catalyst (FCC1), an equilibrium FCC catalyst with metal impurities (ECat), a mesoporous Al2O3, a USY zeolite (Y), a ZSM5-based FCC additive (ZSM5), and an inert silicon c…	Journal of Catalysis	NA	219517	247	2	2007-04-25	2007-04-25	307	327	10.1016/j.jcat.2007.01.023	0	FALSE	FALSE	NA	Journal	Copyright Ã‚Â© 2007 Elsevier Inc. All rights reserved.	S0021-9517(07)00037-1	33947706728	2-s2.0-33947706728	The catalytic cracking of glycerol and sorbitol, as representative of biomass-derived oxygenates, was studied at 500Ã¢â‚¬â€œ700Ã¢â‚¬â€°Ã‚Â°C with six different catalysts, including a fresh fluid catalytic cracking (FCC)...	NA	NA	NA	Biomass | Catalytic cracking | Glycerol | Zeolites | Biofuels | Biochemicals	NA	sorbitol
306	1-s2.0-S0021951707000371	TRUE	DOI:10.1016/j.jcat.2007.01.023	https://api.elsevier.com/content/article/pii/S0021951707000371	Processing biomass-derived oxygenates in the oil refinery: Catalytic cracking (FCC) reaction pathways and role of catalyst	Avelino, Corma	Abstract The catalytic cracking of glycerol and sorbitol, as representative of biomass-derived oxygenates, was studied at 500Ã¢â‚¬â€œ700Ã¢â‚¬â€°Ã‚Â°C with six different catalysts, including a fresh fluid catalytic cracking (FCC) catalyst (FCC1), an equilibrium FCC catalyst with metal impurities (ECat), a mesoporous Al2O3, a USY zeolite (Y), a ZSM5-based FCC additive (ZSM5), and an inert silicon c…	Journal of Catalysis	NA	219517	247	2	2007-04-25	2007-04-25	307	327	10.1016/j.jcat.2007.01.023	0	FALSE	FALSE	NA	Journal	Copyright Ã‚Â© 2007 Elsevier Inc. All rights reserved.	S0021-9517(07)00037-1	33947706728	2-s2.0-33947706728	The catalytic cracking of glycerol and sorbitol, as representative of biomass-derived oxygenates, was studied at 500Ã¢â‚¬â€œ700Ã¢â‚¬â€°Ã‚Â°C with six different catalysts, including a fresh fluid catalytic cracking (FCC)...	NA	NA	NA	Biomass | Catalytic cracking | Glycerol | Zeolites | Biofuels | Biochemicals	NA	olefin
307	1-s2.0-S0021951708001644	TRUE	DOI:10.1016/j.jcat.2008.04.016	https://api.elsevier.com/content/article/pii/S0021951708001644	Biomass to chemicals: Catalytic conversion of glycerol/water mixtures into acrolein, reaction network	Avelino, Corma	Abstract Acrolein was obtained by reacting gas-phase glycerol/water mixtures with zeolite catalysts. Glycerol was converted through a series of reactions involving dehydration, cracking, and hydrogen transfer and catalyzed by the acid sites of the zeolite. Acrolein was the major product; short olefins, aromatics, acetaldehyde, hydroxyacetone, acids, and acetone also were formed through a complex …	Journal of Catalysis	NA	219517	257	1	2008-07-01	2008-07-01	163	171	10.1016/j.jcat.2008.04.016	0	FALSE	FALSE	NA	Journal	Copyright Ã‚Â© 2008 Elsevier Inc. All rights reserved.	S0021-9517(08)00164-4	44749085034	2-s2.0-44749085034	Acrolein was obtained by reacting gas-phase glycerol/water mixtures with zeolite catalysts. Glycerol was converted through a series of reactions involving dehydration, cracking, and hydrogen transfer...	NA	NA	NA	Catalytic cracking | Glycerol | Olefins | Acrolein | Biomass | Biochemicals | Zeolites	NA	acetaldehyde
308	1-s2.0-S0021951708001644	TRUE	DOI:10.1016/j.jcat.2008.04.016	https://api.elsevier.com/content/article/pii/S0021951708001644	Biomass to chemicals: Catalytic conversion of glycerol/water mixtures into acrolein, reaction network	Avelino, Corma	Abstract Acrolein was obtained by reacting gas-phase glycerol/water mixtures with zeolite catalysts. Glycerol was converted through a series of reactions involving dehydration, cracking, and hydrogen transfer and catalyzed by the acid sites of the zeolite. Acrolein was the major product; short olefins, aromatics, acetaldehyde, hydroxyacetone, acids, and acetone also were formed through a complex …	Journal of Catalysis	NA	219517	257	1	2008-07-01	2008-07-01	163	171	10.1016/j.jcat.2008.04.016	0	FALSE	FALSE	NA	Journal	Copyright Ã‚Â© 2008 Elsevier Inc. All rights reserved.	S0021-9517(08)00164-4	44749085034	2-s2.0-44749085034	Acrolein was obtained by reacting gas-phase glycerol/water mixtures with zeolite catalysts. Glycerol was converted through a series of reactions involving dehydration, cracking, and hydrogen transfer...	NA	NA	NA	Catalytic cracking | Glycerol | Olefins | Acrolein | Biomass | Biochemicals | Zeolites	NA	glycerol
309	1-s2.0-S0021951708001644	TRUE	DOI:10.1016/j.jcat.2008.04.016	https://api.elsevier.com/content/article/pii/S0021951708001644	Biomass to chemicals: Catalytic conversion of glycerol/water mixtures into acrolein, reaction network	Avelino, Corma	Abstract Acrolein was obtained by reacting gas-phase glycerol/water mixtures with zeolite catalysts. Glycerol was converted through a series of reactions involving dehydration, cracking, and hydrogen transfer and catalyzed by the acid sites of the zeolite. Acrolein was the major product; short olefins, aromatics, acetaldehyde, hydroxyacetone, acids, and acetone also were formed through a complex …	Journal of Catalysis	NA	219517	257	1	2008-07-01	2008-07-01	163	171	10.1016/j.jcat.2008.04.016	0	FALSE	FALSE	NA	Journal	Copyright Ã‚Â© 2008 Elsevier Inc. All rights reserved.	S0021-9517(08)00164-4	44749085034	2-s2.0-44749085034	Acrolein was obtained by reacting gas-phase glycerol/water mixtures with zeolite catalysts. Glycerol was converted through a series of reactions involving dehydration, cracking, and hydrogen transfer...	NA	NA	NA	Catalytic cracking | Glycerol | Olefins | Acrolein | Biomass | Biochemicals | Zeolites	NA	acrolein
310	1-s2.0-S0021951708001644	TRUE	DOI:10.1016/j.jcat.2008.04.016	https://api.elsevier.com/content/article/pii/S0021951708001644	Biomass to chemicals: Catalytic conversion of glycerol/water mixtures into acrolein, reaction network	Avelino, Corma	Abstract Acrolein was obtained by reacting gas-phase glycerol/water mixtures with zeolite catalysts. Glycerol was converted through a series of reactions involving dehydration, cracking, and hydrogen transfer and catalyzed by the acid sites of the zeolite. Acrolein was the major product; short olefins, aromatics, acetaldehyde, hydroxyacetone, acids, and acetone also were formed through a complex …	Journal of Catalysis	NA	219517	257	1	2008-07-01	2008-07-01	163	171	10.1016/j.jcat.2008.04.016	0	FALSE	FALSE	NA	Journal	Copyright Ã‚Â© 2008 Elsevier Inc. All rights reserved.	S0021-9517(08)00164-4	44749085034	2-s2.0-44749085034	Acrolein was obtained by reacting gas-phase glycerol/water mixtures with zeolite catalysts. Glycerol was converted through a series of reactions involving dehydration, cracking, and hydrogen transfer...	NA	NA	NA	Catalytic cracking | Glycerol | Olefins | Acrolein | Biomass | Biochemicals | Zeolites	NA	acetone
311	1-s2.0-S0021951709003017	TRUE	DOI:10.1016/j.jcat.2009.09.008	https://api.elsevier.com/content/article/pii/S0021951709003017	Valorization of bio-glycerol: New catalytic materials for the synthesis of glycerol carbonate via glycerolysis of urea	Michele, Aresta	Abstract The glycerolysis of urea plays an important role in the conversion of glycerol into glycerol carbonate because it is a phosgene-free process that uses easily available and low-cost raw materials that have a low toxicity. ÃŽÂ³-Zirconium phosphate shows a good activity as catalyst as it affords 80% of conversion of glycerol under mild reaction conditions. The catalyst is easily recoverable…	Journal of Catalysis	NA	219517	268	1	2009-11-15	2009-11-15	106	114	10.1016/j.jcat.2009.09.008	0	FALSE	FALSE	NA	Journal	Copyright Ã‚Â© 2009 Elsevier Inc. All rights reserved.	S0021-9517(09)00301-7	71549157810	2-s2.0-71549157810	The glycerolysis of urea plays an important role in the conversion of glycerol into glycerol carbonate because it is a phosgene-free process that uses easily available and low-cost raw materials that...	NA	NA	NA	Glycerolysis of urea | Reaction mechanism | Glycerol carbonate | Heterogeneous catalysis	NA	glycerol_carbonate
312	1-s2.0-S0021951709003017	TRUE	DOI:10.1016/j.jcat.2009.09.008	https://api.elsevier.com/content/article/pii/S0021951709003017	Valorization of bio-glycerol: New catalytic materials for the synthesis of glycerol carbonate via glycerolysis of urea	Michele, Aresta	Abstract The glycerolysis of urea plays an important role in the conversion of glycerol into glycerol carbonate because it is a phosgene-free process that uses easily available and low-cost raw materials that have a low toxicity. ÃŽÂ³-Zirconium phosphate shows a good activity as catalyst as it affords 80% of conversion of glycerol under mild reaction conditions. The catalyst is easily recoverable…	Journal of Catalysis	NA	219517	268	1	2009-11-15	2009-11-15	106	114	10.1016/j.jcat.2009.09.008	0	FALSE	FALSE	NA	Journal	Copyright Ã‚Â© 2009 Elsevier Inc. All rights reserved.	S0021-9517(09)00301-7	71549157810	2-s2.0-71549157810	The glycerolysis of urea plays an important role in the conversion of glycerol into glycerol carbonate because it is a phosgene-free process that uses easily available and low-cost raw materials that...	NA	NA	NA	Glycerolysis of urea | Reaction mechanism | Glycerol carbonate | Heterogeneous catalysis	NA	glycerol
313	1-s2.0-S0021951709003273	TRUE	DOI:10.1016/j.jcat.2009.09.023	https://api.elsevier.com/content/article/pii/S0021951709003273	Synthesis of long alkyl chain ethers through direct etherification of biomass-based alcohols with 1-octene over heterogeneous acid catalysts	Agnieszka M., Ruppert	Abstract Heterogeneous etherification of various biomass-based alcohols with 1-octene was investigated as a direct route for the synthesis of long alkyl chain ethers. Several acid catalyst materials including Amberlyst resins and various zeolites were screened as etherification catalysts in a solventless system. It was found that H-Beta zeolites are the most selective catalysts for the etherifica…	Journal of Catalysis	NA	219517	268	2	2009-12-10	2009-12-10	251	259	10.1016/j.jcat.2009.09.023	0	FALSE	FALSE	NA	Journal	Copyright Ã‚Â© 2009 Elsevier Inc. All rights reserved.	S0021-9517(09)00327-3	72449196290	2-s2.0-72449196290	Heterogeneous etherification of various biomass-based alcohols with 1-octene was investigated as a direct route for the synthesis of long alkyl chain ethers. Several acid catalyst materials including...	NA	NA	NA	Etherification | Zeolites | Biomass | Glycerol | Glycols | Octyl-ethers | Alkenes	NA	ethylene_glycol
314	1-s2.0-S0021951709003273	TRUE	DOI:10.1016/j.jcat.2009.09.023	https://api.elsevier.com/content/article/pii/S0021951709003273	Synthesis of long alkyl chain ethers through direct etherification of biomass-based alcohols with 1-octene over heterogeneous acid catalysts	Agnieszka M., Ruppert	Abstract Heterogeneous etherification of various biomass-based alcohols with 1-octene was investigated as a direct route for the synthesis of long alkyl chain ethers. Several acid catalyst materials including Amberlyst resins and various zeolites were screened as etherification catalysts in a solventless system. It was found that H-Beta zeolites are the most selective catalysts for the etherifica…	Journal of Catalysis	NA	219517	268	2	2009-12-10	2009-12-10	251	259	10.1016/j.jcat.2009.09.023	0	FALSE	FALSE	NA	Journal	Copyright Ã‚Â© 2009 Elsevier Inc. All rights reserved.	S0021-9517(09)00327-3	72449196290	2-s2.0-72449196290	Heterogeneous etherification of various biomass-based alcohols with 1-octene was investigated as a direct route for the synthesis of long alkyl chain ethers. Several acid catalyst materials including...	NA	NA	NA	Etherification | Zeolites | Biomass | Glycerol | Glycols | Octyl-ethers | Alkenes	NA	glycerol
315	1-s2.0-S0021951709003704	TRUE	DOI:10.1016/j.jcat.2009.11.001	https://api.elsevier.com/content/article/pii/S0021951709003704	Chemicals from biomass: Synthesis of glycerol carbonate by transesterification and carbonylation with urea with hydrotalcite catalysts. The role of acidÃ¢â‚¬â€œbase pairs	Maria J., Climent	Abstract Synthesis of glycerol carbonate has been performed by transesterification of ethylene carbonate with glycerol catalyzed by basic oxides (MgO, and CaO), and mixed oxides (Al/Mg, Al/Li) derived from hydrotalcites. The results showed that the optimum catalyst in terms of activity and selectivity is a strong basic Al/Ca-mixed oxide (AlCaMO) which is able to catalyze the reaction at low tempe…	Journal of Catalysis	NA	219517	269	1	2010-01-01	2010-01-01	140	149	10.1016/j.jcat.2009.11.001	0	FALSE	FALSE	NA	Journal	Copyright Ã‚Â© 2009 Elsevier Inc. All rights reserved.	S0021-9517(09)00370-4	73649114938	2-s2.0-73649114938	Synthesis of glycerol carbonate has been performed by transesterification of ethylene carbonate with glycerol catalyzed by basic oxides (MgO, and CaO), and mixed oxides (Al/Mg, Al/Li) derived from hydrotalcites....	NA	NA	NA	Glycerol carbonate | Glycerol transesterification | Urea carbamoilation | Hydrotalcites | Bifunctional acidÃ¢â‚¬â€œbase catalysts	NA	glycerol_carbonate
316	1-s2.0-S0021951709003704	TRUE	DOI:10.1016/j.jcat.2009.11.001	https://api.elsevier.com/content/article/pii/S0021951709003704	Chemicals from biomass: Synthesis of glycerol carbonate by transesterification and carbonylation with urea with hydrotalcite catalysts. The role of acidÃ¢â‚¬â€œbase pairs	Maria J., Climent	Abstract Synthesis of glycerol carbonate has been performed by transesterification of ethylene carbonate with glycerol catalyzed by basic oxides (MgO, and CaO), and mixed oxides (Al/Mg, Al/Li) derived from hydrotalcites. The results showed that the optimum catalyst in terms of activity and selectivity is a strong basic Al/Ca-mixed oxide (AlCaMO) which is able to catalyze the reaction at low tempe…	Journal of Catalysis	NA	219517	269	1	2010-01-01	2010-01-01	140	149	10.1016/j.jcat.2009.11.001	0	FALSE	FALSE	NA	Journal	Copyright Ã‚Â© 2009 Elsevier Inc. All rights reserved.	S0021-9517(09)00370-4	73649114938	2-s2.0-73649114938	Synthesis of glycerol carbonate has been performed by transesterification of ethylene carbonate with glycerol catalyzed by basic oxides (MgO, and CaO), and mixed oxides (Al/Mg, Al/Li) derived from hydrotalcites....	NA	NA	NA	Glycerol carbonate | Glycerol transesterification | Urea carbamoilation | Hydrotalcites | Bifunctional acidÃ¢â‚¬â€œbase catalysts	NA	glycerol
317	1-s2.0-S0021951712000760	TRUE	DOI:10.1016/j.jcat.2012.03.004	https://api.elsevier.com/content/article/pii/S0021951712000760	Liquid-phase glycerol hydrogenolysis by formic acid over NiÃ¢â‚¬â€œCu/Al2O3 catalysts	I., Gandarias	Abstract Two series of NiÃ¢â‚¬â€œCu/Al2O3 catalysts with different Cu/Ni ratio and different total metal contents were prepared and tested in the glycerol hydrogenolysis to 1,2-propanediol under N2 pressure and using formic acid as hydrogen donor molecule. The results from the deep characterization of the catalysts by N2-physisorption, transmission electron microscopy (TEM), temperature-programed…	Journal of Catalysis	NA	219517	290	NA	2012-06-01	2012-06-01	79	89	10.1016/j.jcat.2012.03.004	0	FALSE	FALSE	NA	Journal	Copyright Ã‚Â© 2012 Elsevier Inc. All rights reserved.	S0021-9517(12)00076-0	84861195495	2-s2.0-84861195495	Two series of NiÃ¢â‚¬â€œCu/Al2O3 catalysts with different Cu/Ni ratio and different total metal contents were prepared and tested in the glycerol hydrogenolysis to 1,2-propanediol under N2 pressure and using...	NA	NA	NA	Biomass | Hydrogenolysis | 1,2-Propanediol | Transfer hydrogenation | Formic acid	NA	glycerol
318	1-s2.0-S0021951713001073	TRUE	DOI:10.1016/j.jcat.2013.03.022	https://api.elsevier.com/content/article/pii/S0021951713001073	Aqueous-phase hydrodeoxygenation of sorbitol: A comparative study of Pt/Zr phosphate and PtReOx/C	Yong Tae, Kim	Abstract In this paper, we have studied the aqueous-phase hydrodeoxygenation of sorbitol over two fundamentally different types of bifunctional catalysts: Pt/Zr-P and PtReOx/C in a continuous flow reactor. During the reaction, the Pt/Zr-P catalyst undergoes phase transformations of amorphous into crystalline Zr-P having a rhombohedral framework along with a 97% loss of surface area, 86% loss of P…	Journal of Catalysis	NA	219517	304	NA	2013-08-01	2013-08-01	72	85	10.1016/j.jcat.2013.03.022	0	FALSE	FALSE	NA	Journal	Copyright Ã‚Â© 2013 Elsevier Inc. All rights reserved.	S0021-9517(13)00107-3	84877639649	2-s2.0-84877639649	In this paper, we have studied the aqueous-phase hydrodeoxygenation of sorbitol over two fundamentally different types of bifunctional catalysts: Pt/Zr-P and PtReOx/C in a continuous flow reactor. During...	NA	NA	NA	Biofuels | Biomass conversion | Hydrodeoxygenation | Bifunctional catalysis	NA	sorbitol
319	1-s2.0-S0021951713001073	TRUE	DOI:10.1016/j.jcat.2013.03.022	https://api.elsevier.com/content/article/pii/S0021951713001073	Aqueous-phase hydrodeoxygenation of sorbitol: A comparative study of Pt/Zr phosphate and PtReOx/C	Yong Tae, Kim	Abstract In this paper, we have studied the aqueous-phase hydrodeoxygenation of sorbitol over two fundamentally different types of bifunctional catalysts: Pt/Zr-P and PtReOx/C in a continuous flow reactor. During the reaction, the Pt/Zr-P catalyst undergoes phase transformations of amorphous into crystalline Zr-P having a rhombohedral framework along with a 97% loss of surface area, 86% loss of P…	Journal of Catalysis	NA	219517	304	NA	2013-08-01	2013-08-01	72	85	10.1016/j.jcat.2013.03.022	0	FALSE	FALSE	NA	Journal	Copyright Ã‚Â© 2013 Elsevier Inc. All rights reserved.	S0021-9517(13)00107-3	84877639649	2-s2.0-84877639649	In this paper, we have studied the aqueous-phase hydrodeoxygenation of sorbitol over two fundamentally different types of bifunctional catalysts: Pt/Zr-P and PtReOx/C in a continuous flow reactor. During...	NA	NA	NA	Biofuels | Biomass conversion | Hydrodeoxygenation | Bifunctional catalysis	NA	methanol
320	1-s2.0-S0021951713001073	TRUE	DOI:10.1016/j.jcat.2013.03.022	https://api.elsevier.com/content/article/pii/S0021951713001073	Aqueous-phase hydrodeoxygenation of sorbitol: A comparative study of Pt/Zr phosphate and PtReOx/C	Yong Tae, Kim	Abstract In this paper, we have studied the aqueous-phase hydrodeoxygenation of sorbitol over two fundamentally different types of bifunctional catalysts: Pt/Zr-P and PtReOx/C in a continuous flow reactor. During the reaction, the Pt/Zr-P catalyst undergoes phase transformations of amorphous into crystalline Zr-P having a rhombohedral framework along with a 97% loss of surface area, 86% loss of P…	Journal of Catalysis	NA	219517	304	NA	2013-08-01	2013-08-01	72	85	10.1016/j.jcat.2013.03.022	0	FALSE	FALSE	NA	Journal	Copyright Ã‚Â© 2013 Elsevier Inc. All rights reserved.	S0021-9517(13)00107-3	84877639649	2-s2.0-84877639649	In this paper, we have studied the aqueous-phase hydrodeoxygenation of sorbitol over two fundamentally different types of bifunctional catalysts: Pt/Zr-P and PtReOx/C in a continuous flow reactor. During...	NA	NA	NA	Biofuels | Biomass conversion | Hydrodeoxygenation | Bifunctional catalysis	NA	thf
321	1-s2.0-S0021951713001073	TRUE	DOI:10.1016/j.jcat.2013.03.022	https://api.elsevier.com/content/article/pii/S0021951713001073	Aqueous-phase hydrodeoxygenation of sorbitol: A comparative study of Pt/Zr phosphate and PtReOx/C	Yong Tae, Kim	Abstract In this paper, we have studied the aqueous-phase hydrodeoxygenation of sorbitol over two fundamentally different types of bifunctional catalysts: Pt/Zr-P and PtReOx/C in a continuous flow reactor. During the reaction, the Pt/Zr-P catalyst undergoes phase transformations of amorphous into crystalline Zr-P having a rhombohedral framework along with a 97% loss of surface area, 86% loss of P…	Journal of Catalysis	NA	219517	304	NA	2013-08-01	2013-08-01	72	85	10.1016/j.jcat.2013.03.022	0	FALSE	FALSE	NA	Journal	Copyright Ã‚Â© 2013 Elsevier Inc. All rights reserved.	S0021-9517(13)00107-3	84877639649	2-s2.0-84877639649	In this paper, we have studied the aqueous-phase hydrodeoxygenation of sorbitol over two fundamentally different types of bifunctional catalysts: Pt/Zr-P and PtReOx/C in a continuous flow reactor. During...	NA	NA	NA	Biofuels | Biomass conversion | Hydrodeoxygenation | Bifunctional catalysis	NA	isosorbide
322	1-s2.0-S0021951713001073	TRUE	DOI:10.1016/j.jcat.2013.03.022	https://api.elsevier.com/content/article/pii/S0021951713001073	Aqueous-phase hydrodeoxygenation of sorbitol: A comparative study of Pt/Zr phosphate and PtReOx/C	Yong Tae, Kim	Abstract In this paper, we have studied the aqueous-phase hydrodeoxygenation of sorbitol over two fundamentally different types of bifunctional catalysts: Pt/Zr-P and PtReOx/C in a continuous flow reactor. During the reaction, the Pt/Zr-P catalyst undergoes phase transformations of amorphous into crystalline Zr-P having a rhombohedral framework along with a 97% loss of surface area, 86% loss of P…	Journal of Catalysis	NA	219517	304	NA	2013-08-01	2013-08-01	72	85	10.1016/j.jcat.2013.03.022	0	FALSE	FALSE	NA	Journal	Copyright Ã‚Â© 2013 Elsevier Inc. All rights reserved.	S0021-9517(13)00107-3	84877639649	2-s2.0-84877639649	In this paper, we have studied the aqueous-phase hydrodeoxygenation of sorbitol over two fundamentally different types of bifunctional catalysts: Pt/Zr-P and PtReOx/C in a continuous flow reactor. During...	NA	NA	NA	Biofuels | Biomass conversion | Hydrodeoxygenation | Bifunctional catalysis	NA	glycerol
323	1-s2.0-S002195171300242X	TRUE	DOI:10.1016/j.jcat.2013.06.026	https://api.elsevier.com/content/article/pii/S002195171300242X	Design of a highly active silver-exchanged phosphotungstic acid catalyst for glycerol esterification with acetic acid	Shanhui, Zhu	Abstract A series of highly active, selective, and stable silver-exchanged phosphotungstic acid (AgPW) catalysts were prepared, characterized, and evaluated for bio-derived glycerol esterification with acetic acid to produce valuable biofuel additives. The structures, morphologies, acidities, and water tolerance of these samples were determined by FTIR, Raman, XRD, SEM-EDX, FT-IR of pyridine adso…	Journal of Catalysis	NA	219517	306	NA	2013-10-01	2013-10-01	155	163	10.1016/j.jcat.2013.06.026	0	FALSE	FALSE	NA	Journal	Copyright Ã‚Â© 2013 Elsevier Inc. All rights reserved.	S0021-9517(13)00242-X	84881145438	2-s2.0-84881145438	A series of highly active, selective, and stable silver-exchanged phosphotungstic acid (AgPW) catalysts were prepared, characterized, and evaluated for bio-derived glycerol esterification with acetic...	NA	NA	NA	Glycerol | Esterification | Biofuels | Ag | Phosphotungstic acid	NA	acetic_acid
324	1-s2.0-S002195171300242X	TRUE	DOI:10.1016/j.jcat.2013.06.026	https://api.elsevier.com/content/article/pii/S002195171300242X	Design of a highly active silver-exchanged phosphotungstic acid catalyst for glycerol esterification with acetic acid	Shanhui, Zhu	Abstract A series of highly active, selective, and stable silver-exchanged phosphotungstic acid (AgPW) catalysts were prepared, characterized, and evaluated for bio-derived glycerol esterification with acetic acid to produce valuable biofuel additives. The structures, morphologies, acidities, and water tolerance of these samples were determined by FTIR, Raman, XRD, SEM-EDX, FT-IR of pyridine adso…	Journal of Catalysis	NA	219517	306	NA	2013-10-01	2013-10-01	155	163	10.1016/j.jcat.2013.06.026	0	FALSE	FALSE	NA	Journal	Copyright Ã‚Â© 2013 Elsevier Inc. All rights reserved.	S0021-9517(13)00242-X	84881145438	2-s2.0-84881145438	A series of highly active, selective, and stable silver-exchanged phosphotungstic acid (AgPW) catalysts were prepared, characterized, and evaluated for bio-derived glycerol esterification with acetic...	NA	NA	NA	Glycerol | Esterification | Biofuels | Ag | Phosphotungstic acid	NA	glycerol
325	1-s2.0-S0021951714002735	TRUE	DOI:10.1016/j.jcat.2014.09.022	https://api.elsevier.com/content/article/pii/S0021951714002735	Heteropolyacid-based ionic liquids as efficient homogeneous catalysts for acetylation of glycerol	Ming-Yu, Huang	Abstract A series of homogeneous catalysts consisting of pyridinium propyl sulfobetaine (PPS), tungstophosphoric acid (TPA), and acetic acid (HOAc) have been synthesized and exploited for catalytic acetylation of glycerol (GL). Their acid properties were characterized by 31P NMR of trimethylphosphine oxide (TMPO) as the probe molecule, and the effects of acidic strength, PPS/TPA, TPA/GL, and HOAc…	Journal of Catalysis	NA	219517	320	NA	2014-12-01	2014-12-01	42	51	10.1016/j.jcat.2014.09.022	0	FALSE	FALSE	NA	Journal	Copyright Ã‚Â© 2014 Elsevier Inc. All rights reserved.	S0021-9517(14)00273-5	84909629664	2-s2.0-84909629664	A series of homogeneous catalysts consisting of pyridinium propyl sulfobetaine (PPS), tungstophosphoric acid (TPA), and acetic acid (HOAc) have been synthesized and exploited for catalytic acetylation...	NA	NA	NA	Homogeneous catalysis | Heteropolyacid | Ionic liquid | Acetylation reaction | Glycerol | Glycerol triacetate | Acidity | 31P-TMPO NMR	NA	acetic_acid
326	1-s2.0-S0021951714002735	TRUE	DOI:10.1016/j.jcat.2014.09.022	https://api.elsevier.com/content/article/pii/S0021951714002735	Heteropolyacid-based ionic liquids as efficient homogeneous catalysts for acetylation of glycerol	Ming-Yu, Huang	Abstract A series of homogeneous catalysts consisting of pyridinium propyl sulfobetaine (PPS), tungstophosphoric acid (TPA), and acetic acid (HOAc) have been synthesized and exploited for catalytic acetylation of glycerol (GL). Their acid properties were characterized by 31P NMR of trimethylphosphine oxide (TMPO) as the probe molecule, and the effects of acidic strength, PPS/TPA, TPA/GL, and HOAc…	Journal of Catalysis	NA	219517	320	NA	2014-12-01	2014-12-01	42	51	10.1016/j.jcat.2014.09.022	0	FALSE	FALSE	NA	Journal	Copyright Ã‚Â© 2014 Elsevier Inc. All rights reserved.	S0021-9517(14)00273-5	84909629664	2-s2.0-84909629664	A series of homogeneous catalysts consisting of pyridinium propyl sulfobetaine (PPS), tungstophosphoric acid (TPA), and acetic acid (HOAc) have been synthesized and exploited for catalytic acetylation...	NA	NA	NA	Homogeneous catalysis | Heteropolyacid | Ionic liquid | Acetylation reaction | Glycerol | Glycerol triacetate | Acidity | 31P-TMPO NMR	NA	glycerol
[truncated: 5,837 more rows]
