# Supplementary material
Source: MDPI journal article supplement (https://www.mdpi.com/1996-1073/13/11/2747)

**Link to the source codes:** <https://github.com/cbdavis/Biogas-Feedstock-Application-Cooccurrence>

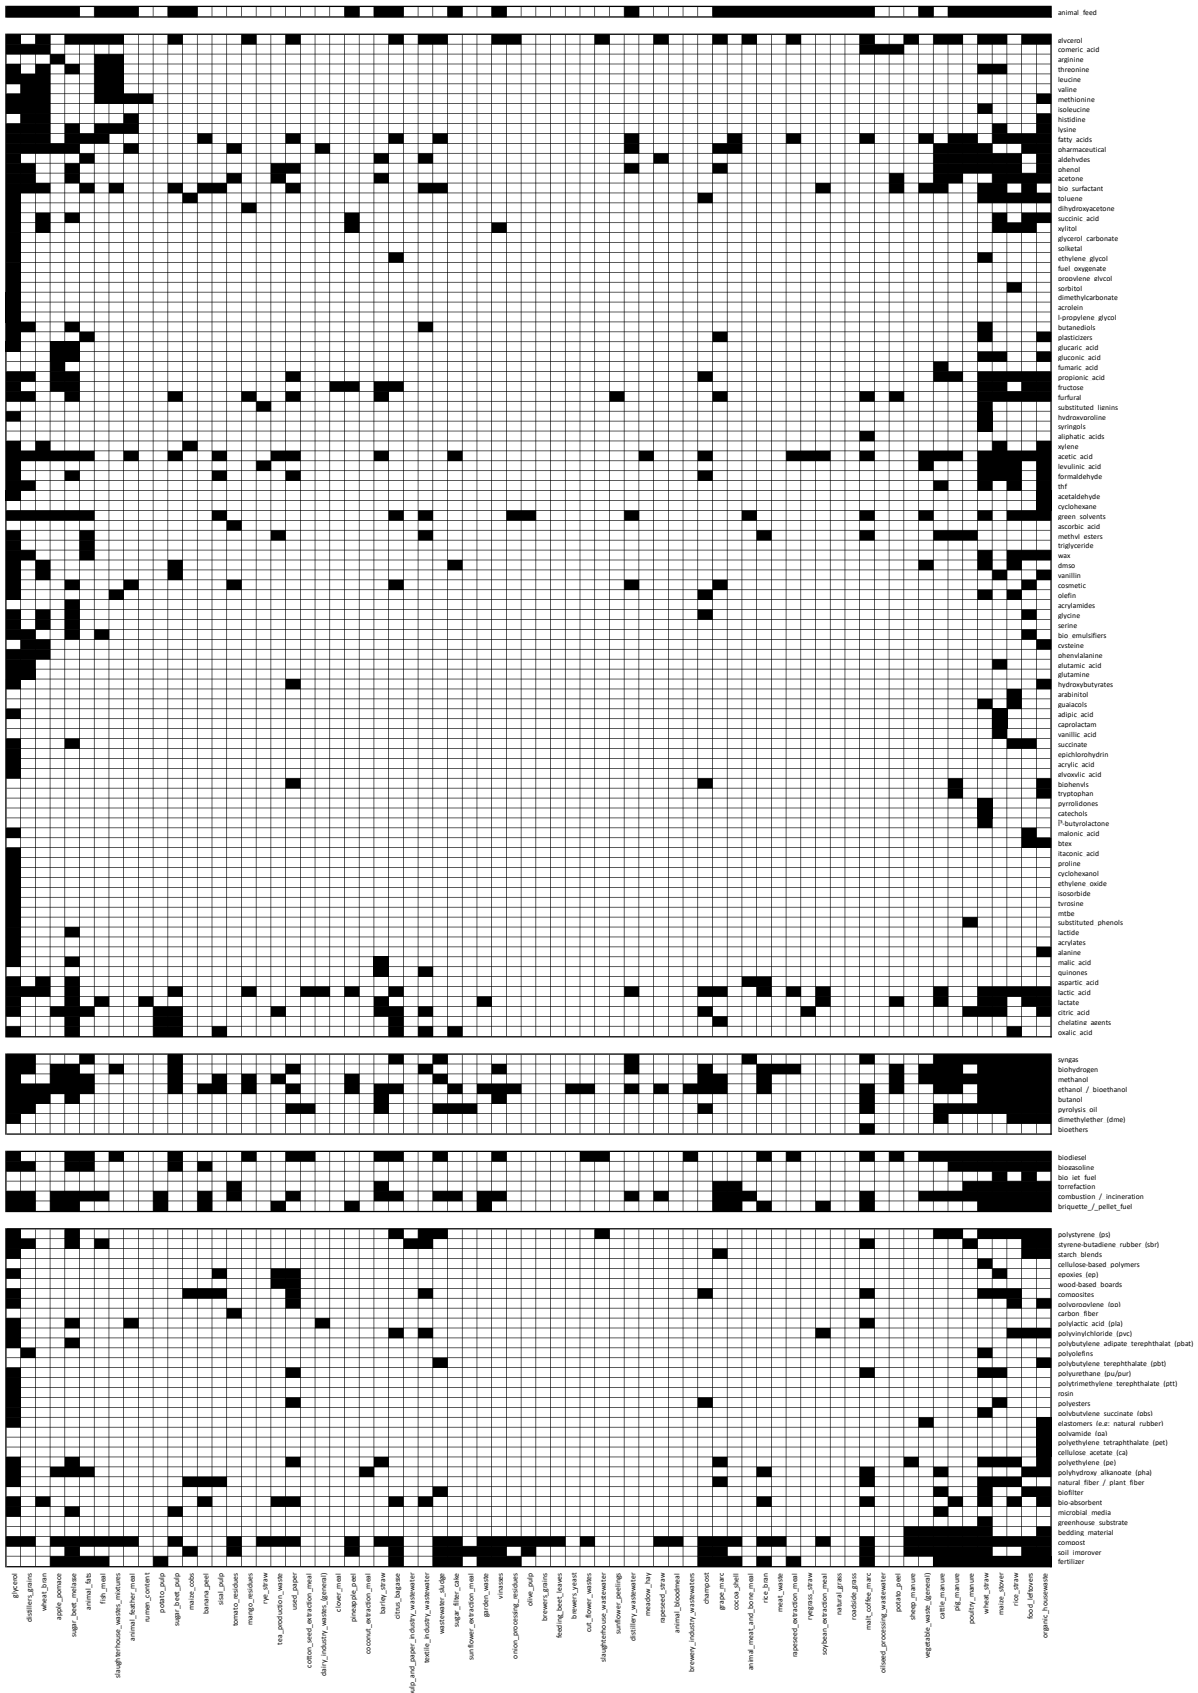

Supplement: s1 [file s1 › z.Appendix D - Co-occurences matrix and link to the source codes.pdf]
